# Supplementary material for: Adolescent Stress Reduces Adult Morphine-Induced Behavioral Sensitization in C57BL/6J Mice
Source: Front Behav Neurosci. 2021 Jun 3;15:678102. doi: 10.3389/fnbeh.2021.678102 (PMC8209305; doi:10.3389/fnbeh.2021.678102)
Supplement: Supplementary file 5 [file Table_5.XLS]

## Sheet: Sheet0
© 2000-2020 QIAGEN. All rights reserved.
Categories	Diseases or Functions Annotation	p-value	Molecules	# Molecules
Cancer,Organismal Injury and Abnormalities	Non-hematological solid tumor	7.44e-208	A4GALT,A4GNT,AAGAB,AAK1,AASDHPPT,AATK,ABAT,ABCA1,ABCA2,ABCA5,ABCA8,ABCB10,ABCB4,ABCC8,ABCD2,ABCE1,ABCG1,ABCG5,ABHD10,ABHD13,ABHD14A-ACY1,ABHD14B,ABHD18,ABHD2,ABI2,ABL1,ABL2,ABRA,ABRAXAS2,ACAA2,ACAD11,ACAD8,ACAP2,ACCS,ACE2,ACER2,ACER3,ACKR3,ACO1,ACO2,ACOT7,ACOXL,ACP3,ACP5,ACSF2,ACSM1,ACSM3,ACSM5,ACSM6,ACTA1,ACTR1A,ACTR2,ACTR5,ACTRT3,ACVR1,ACVR1C,ACVR2B,ACY1,ACY3,ADAM10,ADAM17,ADAM7,ADAM9,ADAMTS18,…	4133
Cancer,Organismal Injury and Abnormalities	Nonhematologic malignant neoplasm	1.25e-204	A4GALT,A4GNT,AAGAB,AAK1,AASDHPPT,AATK,ABAT,ABCA1,ABCA2,ABCA5,ABCA8,ABCB10,ABCB4,ABCC8,ABCD2,ABCE1,ABCG1,ABCG5,ABHD10,ABHD13,ABHD14A-ACY1,ABHD14B,ABHD18,ABHD2,ABI2,ABL1,ABL2,ABRA,ABRAXAS2,ACAA2,ACAD11,ACAD8,ACAP2,ACCS,ACE2,ACER2,ACER3,ACKR3,ACO1,ACO2,ACOT7,ACOXL,ACP3,ACP5,ACSF2,ACSM1,ACSM3,ACSM5,ACSM6,ACTA1,ACTR1A,ACTR2,ACTR5,ACTRT3,ACVR1,ACVR1C,ACVR2B,ACY1,ACY3,ADAM10,ADAM17,ADAM7,ADAM9,ADAMTS18,…	4118
Cancer,Organismal Injury and Abnormalities	Cancer	3.74e-190	A4GALT,A4GNT,AAGAB,AAK1,AASDHPPT,AATK,ABAT,ABCA1,ABCA2,ABCA5,ABCA8,ABCB10,ABCB4,ABCC8,ABCD2,ABCE1,ABCG1,ABCG5,ABHD10,ABHD13,ABHD14A-ACY1,ABHD14B,ABHD18,ABHD2,ABI2,ABL1,ABL2,ABRA,ABRAXAS2,ACAA2,ACAD11,ACAD8,ACAP2,ACCS,ACE2,ACER2,ACER3,ACKR3,ACO1,ACO2,ACOT7,ACOXL,ACP3,ACP5,ACSF2,ACSM1,ACSM3,ACSM5,ACSM6,ACTA1,ACTR1A,ACTR2,ACTR5,ACTRT3,ACVR1,ACVR1C,ACVR2B,ACY1,ACY3,ADAM10,ADAM17,ADAM7,ADAM9,ADAMTS18,…	4164
Cancer,Organismal Injury and Abnormalities	Malignant solid tumor	1.4e-189	A4GALT,A4GNT,AAGAB,AAK1,AASDHPPT,AATK,ABAT,ABCA1,ABCA2,ABCA5,ABCA8,ABCB10,ABCB4,ABCC8,ABCD2,ABCE1,ABCG1,ABCG5,ABHD10,ABHD13,ABHD14A-ACY1,ABHD14B,ABHD18,ABHD2,ABI2,ABL1,ABL2,ABRA,ABRAXAS2,ACAA2,ACAD11,ACAD8,ACAP2,ACCS,ACE2,ACER2,ACER3,ACKR3,ACO1,ACO2,ACOT7,ACOXL,ACP3,ACP5,ACSF2,ACSM1,ACSM3,ACSM5,ACSM6,ACTA1,ACTR1A,ACTR2,ACTR5,ACTRT3,ACVR1,ACVR1C,ACVR2B,ACY1,ACY3,ADAM10,ADAM17,ADAM7,ADAM9,ADAMTS18,…	4151
Cancer,Organismal Injury and Abnormalities	Non-melanoma solid tumor	5.14e-189	A4GNT,AAGAB,AAK1,AASDHPPT,AATK,ABAT,ABCA1,ABCA2,ABCA5,ABCA8,ABCB10,ABCB4,ABCC8,ABCD2,ABCE1,ABCG1,ABCG5,ABHD10,ABHD13,ABHD14A-ACY1,ABHD14B,ABHD18,ABHD2,ABI2,ABL1,ABL2,ABRA,ABRAXAS2,ACAA2,ACAD11,ACAD8,ACAP2,ACCS,ACE2,ACER2,ACER3,ACKR3,ACO1,ACO2,ACOT7,ACOXL,ACP3,ACP5,ACSF2,ACSM1,ACSM3,ACSM5,ACSM6,ACTA1,ACTR1A,ACTR2,ACTR5,ACTRT3,ACVR1,ACVR1C,ACVR2B,ACY1,ACY3,ADAM10,ADAM17,ADAM7,ADAM9,ADAMTS18,ADAMTS3…	4079
Cancer,Organismal Injury and Abnormalities	Solid tumor	2.64e-187	A4GALT,A4GNT,AAGAB,AAK1,AASDHPPT,AATK,ABAT,ABCA1,ABCA2,ABCA5,ABCA8,ABCB10,ABCB4,ABCC8,ABCD2,ABCE1,ABCG1,ABCG5,ABHD10,ABHD13,ABHD14A-ACY1,ABHD14B,ABHD18,ABHD2,ABI2,ABL1,ABL2,ABRA,ABRAXAS2,ACAA2,ACAD11,ACAD8,ACAP2,ACCS,ACE2,ACER2,ACER3,ACKR3,ACO1,ACO2,ACOT7,ACOXL,ACP3,ACP5,ACSF2,ACSM1,ACSM3,ACSM5,ACSM6,ACTA1,ACTR1A,ACTR2,ACTR5,ACTRT3,ACVR1,ACVR1C,ACVR2B,ACY1,ACY3,ADAM10,ADAM17,ADAM7,ADAM9,ADAMTS18,…	4162
Cancer,Organismal Injury and Abnormalities	Extracranial solid tumor	9.29e-187	A4GALT,A4GNT,AAGAB,AAK1,AASDHPPT,AATK,ABAT,ABCA1,ABCA2,ABCA5,ABCA8,ABCB10,ABCB4,ABCC8,ABCD2,ABCE1,ABCG1,ABCG5,ABHD10,ABHD13,ABHD14A-ACY1,ABHD14B,ABHD18,ABHD2,ABI2,ABL1,ABL2,ABRA,ABRAXAS2,ACAA2,ACAD11,ACAD8,ACAP2,ACCS,ACE2,ACER2,ACER3,ACKR3,ACO1,ACO2,ACOT7,ACOXL,ACP3,ACP5,ACSF2,ACSM1,ACSM3,ACSM5,ACSM6,ACTA1,ACTR1A,ACTR2,ACTR5,ACTRT3,ACVR1,ACVR1C,ACVR2B,ACY1,ACY3,ADAM10,ADAM17,ADAM7,ADAM9,ADAMTS18,…	4144
Cancer,Organismal Injury and Abnormalities	Tumorigenesis of tissue	1.45e-186	A4GNT,AAGAB,AAK1,AASDHPPT,AATK,ABAT,ABCA1,ABCA2,ABCA5,ABCA8,ABCB10,ABCB4,ABCC8,ABCD2,ABCE1,ABCG1,ABCG5,ABHD10,ABHD13,ABHD14A-ACY1,ABHD14B,ABHD18,ABHD2,ABI2,ABL1,ABL2,ABRA,ABRAXAS2,ACAA2,ACAD11,ACAD8,ACAP2,ACCS,ACE2,ACER2,ACER3,ACKR3,ACO1,ACO2,ACOT7,ACOXL,ACP3,ACP5,ACSF2,ACSM1,ACSM3,ACSM5,ACSM6,ACTA1,ACTR1A,ACTR2,ACTR5,ACTRT3,ACVR1,ACVR1C,ACVR2B,ACY1,ACY3,ADAM10,ADAM17,ADAM7,ADAM9,ADAMTS18,ADAMTS3…	4063
Cancer,Organismal Injury and Abnormalities	Epithelial neoplasm	5.59e-184	A4GNT,AAGAB,AAK1,AASDHPPT,AATK,ABAT,ABCA1,ABCA2,ABCA5,ABCA8,ABCB10,ABCB4,ABCC8,ABCD2,ABCE1,ABCG1,ABCG5,ABHD10,ABHD13,ABHD14A-ACY1,ABHD14B,ABHD18,ABHD2,ABI2,ABL1,ABL2,ABRA,ABRAXAS2,ACAA2,ACAD11,ACAD8,ACAP2,ACCS,ACE2,ACER2,ACER3,ACKR3,ACO1,ACO2,ACOT7,ACOXL,ACP3,ACP5,ACSF2,ACSM1,ACSM3,ACSM5,ACSM6,ACTA1,ACTR1A,ACTR2,ACTR5,ACTRT3,ACVR1,ACVR1C,ACVR2B,ACY1,ACY3,ADAM10,ADAM17,ADAM7,ADAM9,ADAMTS18,ADAMTS3…	4051
Cancer,Organismal Injury and Abnormalities	Carcinoma	2.89e-183	A4GNT,AAGAB,AAK1,AASDHPPT,AATK,ABAT,ABCA1,ABCA2,ABCA5,ABCA8,ABCB10,ABCB4,ABCC8,ABCD2,ABCE1,ABCG1,ABCG5,ABHD10,ABHD13,ABHD14A-ACY1,ABHD14B,ABHD18,ABHD2,ABI2,ABL1,ABL2,ABRA,ABRAXAS2,ACAA2,ACAD11,ACAD8,ACAP2,ACCS,ACE2,ACER2,ACER3,ACKR3,ACO1,ACO2,ACOT7,ACOXL,ACP3,ACP5,ACSF2,ACSM1,ACSM3,ACSM5,ACSM6,ACTA1,ACTR1A,ACTR2,ACTR5,ACTRT3,ACVR1,ACVR1C,ACVR2B,ACY1,ACY3,ADAM10,ADAM17,ADAM7,ADAM9,ADAMTS18,ADAMTS3…	4045
Cancer,Organismal Injury and Abnormalities	Abdominal carcinoma	1.96e-117	A4GNT,AAGAB,AAK1,AASDHPPT,AATK,ABAT,ABCA1,ABCA2,ABCA5,ABCA8,ABCB10,ABCB4,ABCC8,ABCD2,ABCE1,ABCG1,ABCG5,ABHD13,ABHD14A-ACY1,ABHD14B,ABHD2,ABI2,ABL1,ABL2,ABRA,ACAA2,ACAD11,ACAD8,ACAP2,ACCS,ACE2,ACER3,ACKR3,ACO1,ACO2,ACOT7,ACOXL,ACP3,ACP5,ACSF2,ACSM1,ACSM3,ACSM5,ACSM6,ACTA1,ACTR1A,ACTR2,ACTR5,ACVR1,ACVR1C,ACVR2B,ACY1,ACY3,ADAM10,ADAM17,ADAM7,ADAM9,ADAMTS18,ADAMTS3,ADAMTS4,ADAMTS8,ADCK1,ADCY6,ADCY7,A…	3644
Cancer,Organismal Injury and Abnormalities	Abdominal neoplasm	2.62e-109	A4GNT,AAGAB,AAK1,AASDHPPT,AATK,ABAT,ABCA1,ABCA2,ABCA5,ABCA8,ABCB10,ABCB4,ABCC8,ABCD2,ABCE1,ABCG1,ABCG5,ABHD13,ABHD14A-ACY1,ABHD14B,ABHD2,ABI2,ABL1,ABL2,ABRA,ACAA2,ACAD11,ACAD8,ACAP2,ACCS,ACE2,ACER3,ACKR3,ACO1,ACO2,ACOT7,ACOXL,ACP3,ACP5,ACSF2,ACSM1,ACSM3,ACSM5,ACSM6,ACTA1,ACTR1A,ACTR2,ACTR5,ACVR1,ACVR1C,ACVR2B,ACY1,ACY3,ADAM10,ADAM17,ADAM7,ADAM9,ADAMTS18,ADAMTS3,ADAMTS4,ADAMTS8,ADCK1,ADCY6,ADCY7,A…	3754
Cancer,Organismal Injury and Abnormalities	Abdominal cancer	2.15e-102	A4GNT,AAGAB,AAK1,AASDHPPT,AATK,ABAT,ABCA1,ABCA2,ABCA5,ABCA8,ABCB10,ABCB4,ABCC8,ABCD2,ABCE1,ABCG1,ABCG5,ABHD13,ABHD14A-ACY1,ABHD14B,ABHD2,ABI2,ABL1,ABL2,ABRA,ACAA2,ACAD11,ACAD8,ACAP2,ACCS,ACE2,ACER3,ACKR3,ACO1,ACO2,ACOT7,ACOXL,ACP3,ACP5,ACSF2,ACSM1,ACSM3,ACSM5,ACSM6,ACTA1,ACTR1A,ACTR2,ACTR5,ACVR1,ACVR1C,ACVR2B,ACY1,ACY3,ADAM10,ADAM17,ADAM7,ADAM9,ADAMTS18,ADAMTS3,ADAMTS4,ADAMTS8,ADCK1,ADCY6,ADCY7,A…	3701
Cancer,Organismal Injury and Abnormalities	Abdominal adenocarcinoma	4.94e-101	A4GNT,AAGAB,AAK1,AASDHPPT,AATK,ABCA1,ABCA2,ABCA5,ABCA8,ABCB10,ABCB4,ABCC8,ABCD2,ABCE1,ABCG1,ABCG5,ABHD13,ABHD14A-ACY1,ABHD14B,ABHD2,ABI2,ABL1,ABL2,ABRA,ACAA2,ACAD11,ACAD8,ACAP2,ACCS,ACE2,ACER3,ACKR3,ACO1,ACOT7,ACOXL,ACP3,ACP5,ACSF2,ACSM1,ACSM3,ACSM5,ACSM6,ACTA1,ACTR1A,ACTR2,ACTR5,ACVR1,ACVR1C,ACVR2B,ACY1,ACY3,ADAM10,ADAM17,ADAM7,ADAM9,ADAMTS18,ADAMTS3,ADAMTS4,ADAMTS8,ADCK1,ADCY6,ADCY7,ADCYAP1R1,A…	3431
Cancer,Organismal Injury and Abnormalities	Adenocarcinoma	1.42e-99	A4GNT,AAGAB,AAK1,AASDHPPT,AATK,ABAT,ABCA1,ABCA2,ABCA5,ABCA8,ABCB10,ABCB4,ABCC8,ABCD2,ABCE1,ABCG1,ABCG5,ABHD13,ABHD14A-ACY1,ABHD14B,ABHD2,ABI2,ABL1,ABL2,ABRA,ABRAXAS2,ACAA2,ACAD11,ACAD8,ACAP2,ACCS,ACE2,ACER3,ACKR3,ACO1,ACOT7,ACOXL,ACP3,ACP5,ACSF2,ACSM1,ACSM3,ACSM5,ACSM6,ACTA1,ACTR1A,ACTR2,ACTR5,ACVR1,ACVR1C,ACVR2B,ACY1,ACY3,ADAM10,ADAM17,ADAM7,ADAM9,ADAMTS18,ADAMTS3,ADAMTS4,ADAMTS8,ADCK1,ADCY6,ADC…	3486
Cancer,Organismal Injury and Abnormalities	Head and neck tumor	1.17e-88	AAGAB,AAK1,AASDHPPT,AATK,ABAT,ABCA1,ABCA2,ABCA5,ABCA8,ABCB10,ABCB4,ABCC8,ABCD2,ABCE1,ABCG1,ABCG5,ABHD13,ABHD14A-ACY1,ABHD18,ABHD2,ABI2,ABL1,ABL2,ABRA,ABRAXAS2,ACAA2,ACAD11,ACAD8,ACAP2,ACCS,ACE2,ACER2,ACER3,ACO1,ACO2,ACOT7,ACOXL,ACSF2,ACSM1,ACSM3,ACSM5,ACSM6,ACTA1,ACTR1A,ACTR2,ACTR5,ACTRT3,ACVR1,ACVR1C,ACVR2B,ACY1,ACY3,ADAM10,ADAM17,ADAM7,ADAM9,ADAMTS18,ADAMTS3,ADAMTS4,ADAMTS8,ADCY6,ADCY7,ADCYAP1R…	3295
Cancer,Organismal Injury and Abnormalities	Cancer of secretory structure	1.58e-88	AAGAB,AAK1,AASDHPPT,AATK,ABAT,ABCA1,ABCA2,ABCA5,ABCA8,ABCB10,ABCB4,ABCC8,ABCD2,ABCE1,ABCG1,ABCG5,ABHD13,ABHD14A-ACY1,ABHD18,ABHD2,ABI2,ABL1,ABL2,ABRA,ABRAXAS2,ACAA2,ACAD11,ACAD8,ACAP2,ACCS,ACE2,ACER2,ACER3,ACKR3,ACO1,ACO2,ACOT7,ACOXL,ACP3,ACP5,ACSF2,ACSM1,ACSM3,ACSM5,ACSM6,ACTA1,ACTR1A,ACTR2,ACTR5,ACTRT3,ACVR1,ACVR1C,ACVR2B,ACY1,ACY3,ADAM10,ADAM17,ADAM7,ADAM9,ADAMTS18,ADAMTS3,ADAMTS4,ADAMTS8,ADCY…	3385
Cancer,Gastrointestinal Disease,Organismal Injury and Abnormalities	Digestive organ tumor	1.84e-87	A4GNT,AAGAB,AAK1,AATK,ABAT,ABCA1,ABCA2,ABCA5,ABCA8,ABCB10,ABCB4,ABCC8,ABCD2,ABCE1,ABCG1,ABCG5,ABHD13,ABHD14A-ACY1,ABHD14B,ABHD2,ABI2,ABL1,ABL2,ABRA,ACAA2,ACAD11,ACAD8,ACAP2,ACCS,ACE2,ACER3,ACKR3,ACO1,ACO2,ACOT7,ACOXL,ACP3,ACSF2,ACSM3,ACSM5,ACSM6,ACTA1,ACTR1A,ACTR2,ACTR5,ACVR1,ACVR1C,ACVR2B,ACY1,ADAM10,ADAM17,ADAM7,ADAM9,ADAMTS18,ADAMTS3,ADAMTS4,ADAMTS8,ADCK1,ADCY6,ADCY7,ADCYAP1R1,ADD3,ADGRA2,ADGR…	3541
Cancer,Organismal Injury and Abnormalities	Head and neck cancer	2.74e-86	AAGAB,AAK1,AASDHPPT,AATK,ABAT,ABCA1,ABCA2,ABCA5,ABCA8,ABCB10,ABCB4,ABCC8,ABCD2,ABCE1,ABCG1,ABCG5,ABHD13,ABHD14A-ACY1,ABHD18,ABHD2,ABI2,ABL1,ABL2,ABRA,ABRAXAS2,ACAA2,ACAD11,ACAD8,ACAP2,ACCS,ACE2,ACER2,ACER3,ACO1,ACO2,ACOT7,ACOXL,ACSF2,ACSM1,ACSM3,ACSM5,ACSM6,ACTA1,ACTR1A,ACTR2,ACTR5,ACTRT3,ACVR1,ACVR1C,ACVR2B,ACY1,ACY3,ADAM10,ADAM17,ADAM7,ADAM9,ADAMTS18,ADAMTS3,ADAMTS4,ADAMTS8,ADCY6,ADCY7,ADCYAP1R…	3260
Cancer,Organismal Injury and Abnormalities	Head and neck carcinoma	1.98e-85	AAGAB,AAK1,AASDHPPT,AATK,ABAT,ABCA1,ABCA2,ABCA5,ABCA8,ABCB10,ABCB4,ABCC8,ABCD2,ABCE1,ABCG1,ABCG5,ABHD13,ABHD14A-ACY1,ABHD18,ABHD2,ABI2,ABL1,ABL2,ABRA,ABRAXAS2,ACAA2,ACAD11,ACAD8,ACAP2,ACCS,ACE2,ACER2,ACER3,ACO1,ACO2,ACOT7,ACOXL,ACSF2,ACSM1,ACSM3,ACSM5,ACSM6,ACTA1,ACTR1A,ACTR2,ACTR5,ACTRT3,ACVR1,ACVR1C,ACVR2B,ACY1,ACY3,ADAM10,ADAM17,ADAM7,ADAM9,ADAMTS18,ADAMTS3,ADAMTS4,ADAMTS8,ADCY6,ADCY7,ADCYAP1R…	3243
Cancer,Gastrointestinal Disease,Organismal Injury and Abnormalities	Digestive system cancer	3.16e-83	A4GNT,AAGAB,AAK1,AATK,ABAT,ABCA1,ABCA2,ABCA5,ABCA8,ABCB10,ABCB4,ABCC8,ABCD2,ABCE1,ABCG1,ABCG5,ABHD13,ABHD14A-ACY1,ABHD14B,ABHD2,ABI2,ABL1,ABL2,ABRA,ACAA2,ACAD11,ACAD8,ACAP2,ACCS,ACE2,ACER3,ACKR3,ACO1,ACO2,ACOT7,ACOXL,ACP3,ACSF2,ACSM3,ACSM5,ACSM6,ACTA1,ACTR1A,ACTR5,ACVR1,ACVR1C,ACVR2B,ACY1,ADAM10,ADAM17,ADAM7,ADAM9,ADAMTS18,ADAMTS3,ADAMTS4,ADAMTS8,ADCK1,ADCY6,ADCY7,ADCYAP1R1,ADD3,ADGRA2,ADGRB3,ADG…	3479
Cancer,Endocrine System Disorders,Organismal Injury and Abnormalities	Endocrine gland tumor	2.26e-78	AAGAB,AAK1,AASDHPPT,AATK,ABAT,ABCA1,ABCA2,ABCA5,ABCA8,ABCB10,ABCB4,ABCC8,ABCD2,ABCE1,ABCG1,ABCG5,ABHD13,ABHD14A-ACY1,ABHD18,ABHD2,ABI2,ABL1,ABL2,ABRA,ABRAXAS2,ACAA2,ACAD11,ACAD8,ACAP2,ACCS,ACE2,ACER2,ACER3,ACO1,ACO2,ACOT7,ACSF2,ACSM1,ACSM3,ACSM5,ACTA1,ACTR1A,ACTR2,ACTR5,ACTRT3,ACVR1,ACVR1C,ACVR2B,ACY1,ACY3,ADAM10,ADAM17,ADAM7,ADAM9,ADAMTS18,ADAMTS3,ADAMTS4,ADAMTS8,ADCY6,ADCY7,ADCYAP1R1,ADD3,ADGRA…	3140
Cancer,Gastrointestinal Disease,Organismal Injury and Abnormalities	Large intestine carcinoma	8.39e-78	A4GNT,AAGAB,AAK1,AATK,ABCA1,ABCA2,ABCA5,ABCA8,ABCB10,ABCB4,ABCC8,ABCD2,ABCE1,ABCG1,ABCG5,ABHD13,ABHD14A-ACY1,ABHD14B,ABHD2,ABI2,ABL1,ABL2,ABRA,ACAA2,ACAD11,ACAD8,ACAP2,ACCS,ACE2,ACER3,ACKR3,ACO1,ACOT7,ACOXL,ACP3,ACTA1,ACTR1A,ACTR5,ACVR1,ACVR1C,ACVR2B,ACY1,ADAM10,ADAM17,ADAM7,ADAM9,ADAMTS18,ADAMTS3,ADAMTS4,ADAMTS8,ADCK1,ADCY6,ADCY7,ADCYAP1R1,ADD3,ADGRA2,ADGRB3,ADGRE1,ADGRE5,ADGRF5,ADGRL2,ADIPOR2,A…	2984
Cancer,Gastrointestinal Disease,Organismal Injury and Abnormalities	Intestinal carcinoma	9.01e-78	A4GNT,AAGAB,AAK1,AATK,ABCA1,ABCA2,ABCA5,ABCA8,ABCB10,ABCB4,ABCC8,ABCD2,ABCE1,ABCG1,ABCG5,ABHD13,ABHD14A-ACY1,ABHD14B,ABHD2,ABI2,ABL1,ABL2,ABRA,ACAA2,ACAD11,ACAD8,ACAP2,ACCS,ACE2,ACER3,ACKR3,ACO1,ACOT7,ACOXL,ACP3,ACTA1,ACTR1A,ACTR5,ACVR1,ACVR1C,ACVR2B,ACY1,ADAM10,ADAM17,ADAM7,ADAM9,ADAMTS18,ADAMTS3,ADAMTS4,ADAMTS8,ADCK1,ADCY6,ADCY7,ADCYAP1R1,ADD3,ADGRA2,ADGRB3,ADGRE1,ADGRE5,ADGRF5,ADGRL2,ADIPOR2,A…	2985
Cancer,Endocrine System Disorders,Organismal Injury and Abnormalities	Nonpituitary endocrine tumor	1.52e-77	AAGAB,AAK1,AASDHPPT,AATK,ABAT,ABCA1,ABCA2,ABCA5,ABCA8,ABCB10,ABCB4,ABCC8,ABCD2,ABCE1,ABCG1,ABCG5,ABHD13,ABHD14A-ACY1,ABHD18,ABHD2,ABI2,ABL1,ABL2,ABRA,ABRAXAS2,ACAA2,ACAD11,ACAD8,ACAP2,ACCS,ACE2,ACER2,ACER3,ACO1,ACO2,ACOT7,ACSF2,ACSM1,ACSM3,ACSM5,ACTA1,ACTR1A,ACTR2,ACTR5,ACTRT3,ACVR1,ACVR1C,ACVR2B,ACY1,ACY3,ADAM10,ADAM17,ADAM7,ADAM9,ADAMTS18,ADAMTS3,ADAMTS4,ADAMTS8,ADCY6,ADCY7,ADCYAP1R1,ADD3,ADGRA…	3123
Cancer,Gastrointestinal Disease,Organismal Injury and Abnormalities	Gastrointestinal adenocarcinoma	1.84e-77	A4GNT,AAGAB,AAK1,AATK,ABCA1,ABCA2,ABCA5,ABCA8,ABCB10,ABCB4,ABCC8,ABCD2,ABCE1,ABCG1,ABCG5,ABHD13,ABHD14A-ACY1,ABHD14B,ABHD2,ABI2,ABL1,ABL2,ABRA,ACAA2,ACAD11,ACAD8,ACAP2,ACCS,ACE2,ACER3,ACKR3,ACO1,ACOT7,ACOXL,ACP3,ACSF2,ACTA1,ACTR1A,ACTR5,ACVR1,ACVR1C,ACVR2B,ACY1,ADAM10,ADAM17,ADAM7,ADAM9,ADAMTS18,ADAMTS3,ADAMTS4,ADAMTS8,ADCK1,ADCY6,ADCY7,ADCYAP1R1,ADD3,ADGRA2,ADGRB3,ADGRE1,ADGRE5,ADGRF5,ADGRL2,ADI…	3025
Cancer,Gastrointestinal Disease,Organismal Injury and Abnormalities	Gastrointestinal carcinoma	2.63e-77	A4GNT,AAGAB,AAK1,AATK,ABCA1,ABCA2,ABCA5,ABCA8,ABCB10,ABCB4,ABCC8,ABCD2,ABCE1,ABCG1,ABCG5,ABHD13,ABHD14A-ACY1,ABHD14B,ABHD2,ABI2,ABL1,ABL2,ABRA,ACAA2,ACAD11,ACAD8,ACAP2,ACCS,ACE2,ACER3,ACKR3,ACO1,ACOT7,ACOXL,ACP3,ACSF2,ACTA1,ACTR1A,ACTR5,ACVR1,ACVR1C,ACVR2B,ACY1,ADAM10,ADAM17,ADAM7,ADAM9,ADAMTS18,ADAMTS3,ADAMTS4,ADAMTS8,ADCK1,ADCY6,ADCY7,ADCYAP1R1,ADD3,ADGRA2,ADGRB3,ADGRE1,ADGRE5,ADGRF5,ADGRL2,ADI…	3112
Cancer,Gastrointestinal Disease,Organismal Injury and Abnormalities	Large intestine adenocarcinoma	4.98e-77	A4GNT,AAGAB,AAK1,AATK,ABCA1,ABCA2,ABCA5,ABCA8,ABCB10,ABCB4,ABCC8,ABCD2,ABCE1,ABCG1,ABCG5,ABHD13,ABHD14A-ACY1,ABHD14B,ABHD2,ABI2,ABL1,ABL2,ABRA,ACAA2,ACAD11,ACAD8,ACAP2,ACCS,ACE2,ACER3,ACKR3,ACO1,ACOT7,ACOXL,ACP3,ACTA1,ACTR1A,ACTR5,ACVR1,ACVR1C,ACVR2B,ACY1,ADAM10,ADAM17,ADAM7,ADAM9,ADAMTS18,ADAMTS3,ADAMTS4,ADAMTS8,ADCK1,ADCY6,ADCY7,ADCYAP1R1,ADD3,ADGRA2,ADGRB3,ADGRE1,ADGRE5,ADGRF5,ADGRL2,ADIPOR2,A…	2962
Cancer,Organismal Injury and Abnormalities	Neck neoplasm	3.41e-76	AAGAB,AAK1,AASDHPPT,AATK,ABAT,ABCA1,ABCA2,ABCA5,ABCA8,ABCB10,ABCB4,ABCC8,ABCD2,ABCE1,ABCG1,ABCG5,ABHD13,ABHD14A-ACY1,ABHD18,ABHD2,ABI2,ABL1,ABL2,ABRA,ABRAXAS2,ACAA2,ACAD11,ACAD8,ACAP2,ACCS,ACE2,ACER2,ACER3,ACO1,ACO2,ACOT7,ACSF2,ACSM1,ACSM3,ACSM5,ACTA1,ACTR1A,ACTR2,ACTR5,ACTRT3,ACVR1,ACVR1C,ACVR2B,ACY1,ACY3,ADAM10,ADAM17,ADAM7,ADAM9,ADAMTS18,ADAMTS3,ADAMTS4,ADAMTS8,ADCY6,ADCY7,ADCYAP1R1,ADD3,ADGRA…	3119
Cancer,Endocrine System Disorders,Organismal Injury and Abnormalities	Thyroid gland tumor	6.8e-74	AAGAB,AAK1,AASDHPPT,AATK,ABAT,ABCA1,ABCA2,ABCA5,ABCA8,ABCB10,ABCB4,ABCC8,ABCD2,ABCE1,ABCG1,ABCG5,ABHD13,ABHD14A-ACY1,ABHD18,ABHD2,ABI2,ABL1,ABL2,ABRA,ABRAXAS2,ACAA2,ACAD11,ACAD8,ACAP2,ACCS,ACE2,ACER2,ACER3,ACO1,ACO2,ACOT7,ACSF2,ACSM1,ACSM3,ACSM5,ACTA1,ACTR1A,ACTR2,ACTR5,ACTRT3,ACVR1,ACVR1C,ACVR2B,ACY1,ACY3,ADAM10,ADAM17,ADAM7,ADAM9,ADAMTS18,ADAMTS3,ADAMTS4,ADAMTS8,ADCY6,ADCY7,ADCYAP1R1,ADD3,ADGRA…	3087
Cancer,Endocrine System Disorders,Organismal Injury and Abnormalities	Endocrine cancer	1.84e-73	AAGAB,AAK1,AASDHPPT,AATK,ABAT,ABCA1,ABCA2,ABCA5,ABCA8,ABCB10,ABCB4,ABCC8,ABCD2,ABCE1,ABCG1,ABCG5,ABHD13,ABHD14A-ACY1,ABHD18,ABHD2,ABI2,ABL1,ABL2,ABRA,ABRAXAS2,ACAA2,ACAD11,ACAD8,ACAP2,ACCS,ACE2,ACER2,ACER3,ACO1,ACO2,ACOT7,ACSF2,ACSM1,ACSM3,ACSM5,ACTA1,ACTR1A,ACTR2,ACTR5,ACTRT3,ACVR1,ACVR1C,ACVR2B,ACY1,ACY3,ADAM10,ADAM17,ADAM7,ADAM9,ADAMTS18,ADAMTS3,ADAMTS4,ADAMTS8,ADCY6,ADCY7,ADCYAP1R1,ADD3,ADGRA…	3088
Cancer,Endocrine System Disorders,Organismal Injury and Abnormalities	Endocrine carcinoma	6.93e-73	AAGAB,AAK1,AASDHPPT,AATK,ABAT,ABCA1,ABCA2,ABCA5,ABCA8,ABCB10,ABCB4,ABCC8,ABCD2,ABCE1,ABCG1,ABCG5,ABHD13,ABHD14A-ACY1,ABHD18,ABHD2,ABI2,ABL1,ABL2,ABRA,ABRAXAS2,ACAA2,ACAD11,ACAD8,ACAP2,ACCS,ACE2,ACER2,ACER3,ACO1,ACO2,ACOT7,ACSF2,ACSM1,ACSM3,ACSM5,ACTA1,ACTR1A,ACTR2,ACTR5,ACTRT3,ACVR1,ACVR1C,ACVR2B,ACY1,ACY3,ADAM10,ADAM17,ADAM7,ADAM9,ADAMTS18,ADAMTS3,ADAMTS4,ADAMTS8,ADCY6,ADCY7,ADCYAP1R1,ADD3,ADGRA…	3081
Cancer,Endocrine System Disorders,Organismal Injury and Abnormalities	Thyroid cancer	9.66e-73	AAGAB,AAK1,AASDHPPT,AATK,ABAT,ABCA1,ABCA2,ABCA5,ABCA8,ABCB10,ABCB4,ABCC8,ABCD2,ABCE1,ABCG1,ABCG5,ABHD13,ABHD14A-ACY1,ABHD18,ABHD2,ABI2,ABL1,ABL2,ABRA,ABRAXAS2,ACAA2,ACAD11,ACAD8,ACAP2,ACCS,ACE2,ACER2,ACER3,ACO1,ACO2,ACOT7,ACSF2,ACSM1,ACSM3,ACSM5,ACTA1,ACTR1A,ACTR2,ACTR5,ACTRT3,ACVR1,ACVR1C,ACVR2B,ACY1,ACY3,ADAM10,ADAM17,ADAM7,ADAM9,ADAMTS18,ADAMTS3,ADAMTS4,ADAMTS8,ADCY6,ADCY7,ADCYAP1R1,ADD3,ADGRA…	3075
Cancer,Endocrine System Disorders,Organismal Injury and Abnormalities	Thyroid carcinoma	3.39e-72	AAGAB,AAK1,AASDHPPT,AATK,ABAT,ABCA1,ABCA2,ABCA5,ABCA8,ABCB10,ABCB4,ABCC8,ABCD2,ABCE1,ABCG1,ABCG5,ABHD13,ABHD14A-ACY1,ABHD18,ABHD2,ABI2,ABL1,ABL2,ABRA,ABRAXAS2,ACAA2,ACAD11,ACAD8,ACAP2,ACCS,ACE2,ACER2,ACER3,ACO1,ACO2,ACOT7,ACSF2,ACSM1,ACSM3,ACSM5,ACTA1,ACTR1A,ACTR2,ACTR5,ACTRT3,ACVR1,ACVR1C,ACVR2B,ACY1,ACY3,ADAM10,ADAM17,ADAM7,ADAM9,ADAMTS18,ADAMTS3,ADAMTS4,ADAMTS8,ADCY6,ADCY7,ADCYAP1R1,ADD3,ADGRA…	3069
Cancer,Gastrointestinal Disease,Organismal Injury and Abnormalities	Gastrointestinal tumor	1.24e-66	A4GNT,AAGAB,AAK1,AATK,ABCA1,ABCA2,ABCA5,ABCA8,ABCB10,ABCB4,ABCC8,ABCD2,ABCE1,ABCG1,ABCG5,ABHD13,ABHD14A-ACY1,ABHD14B,ABHD2,ABI2,ABL1,ABL2,ABRA,ACAA2,ACAD11,ACAD8,ACAP2,ACCS,ACE2,ACER3,ACKR3,ACO1,ACOT7,ACOXL,ACP3,ACSF2,ACTA1,ACTR1A,ACTR5,ACVR1,ACVR1C,ACVR2B,ACY1,ADAM10,ADAM17,ADAM7,ADAM9,ADAMTS18,ADAMTS3,ADAMTS4,ADAMTS8,ADCK1,ADCY6,ADCY7,ADCYAP1R1,ADD3,ADGRA2,ADGRB3,ADGRE1,ADGRE5,ADGRF5,ADGRL2,ADI…	3196
Cancer,Gastrointestinal Disease,Organismal Injury and Abnormalities	Gastrointestinal tract cancer	8.53e-66	A4GNT,AAGAB,AAK1,AATK,ABCA1,ABCA2,ABCA5,ABCA8,ABCB10,ABCB4,ABCC8,ABCD2,ABCE1,ABCG1,ABCG5,ABHD13,ABHD14A-ACY1,ABHD14B,ABHD2,ABI2,ABL1,ABL2,ABRA,ACAA2,ACAD11,ACAD8,ACAP2,ACCS,ACE2,ACER3,ACKR3,ACO1,ACOT7,ACOXL,ACP3,ACSF2,ACTA1,ACTR1A,ACTR5,ACVR1,ACVR1C,ACVR2B,ACY1,ADAM10,ADAM17,ADAM7,ADAM9,ADAMTS18,ADAMTS3,ADAMTS4,ADAMTS8,ADCK1,ADCY6,ADCY7,ADCYAP1R1,ADD3,ADGRA2,ADGRB3,ADGRE1,ADGRE5,ADGRF5,ADGRL2,ADI…	3181
Cancer,Gastrointestinal Disease,Organismal Injury and Abnormalities	Intestinal tumor	1.17e-64	A4GNT,AAGAB,AAK1,AATK,ABCA1,ABCA2,ABCA5,ABCA8,ABCB10,ABCB4,ABCC8,ABCD2,ABCE1,ABCG1,ABCG5,ABHD13,ABHD14A-ACY1,ABHD14B,ABHD2,ABI2,ABL1,ABL2,ABRA,ACAA2,ACAD11,ACAD8,ACAP2,ACCS,ACE2,ACER3,ACKR3,ACO1,ACOT7,ACOXL,ACP3,ACTA1,ACTR1A,ACTR5,ACVR1,ACVR1C,ACVR2B,ACY1,ADAM10,ADAM17,ADAM7,ADAM9,ADAMTS18,ADAMTS3,ADAMTS4,ADAMTS8,ADCK1,ADCY6,ADCY7,ADCYAP1R1,ADD3,ADGRA2,ADGRB3,ADGRE1,ADGRE5,ADGRF5,ADGRL2,ADIPOR2,A…	3071
Cancer,Gastrointestinal Disease,Organismal Injury and Abnormalities	Large intestine neoplasm	2.77e-64	A4GNT,AAGAB,AAK1,AATK,ABCA1,ABCA2,ABCA5,ABCA8,ABCB10,ABCB4,ABCC8,ABCD2,ABCE1,ABCG1,ABCG5,ABHD13,ABHD14A-ACY1,ABHD14B,ABHD2,ABI2,ABL1,ABL2,ABRA,ACAA2,ACAD11,ACAD8,ACAP2,ACCS,ACE2,ACER3,ACKR3,ACO1,ACOT7,ACOXL,ACP3,ACTA1,ACTR1A,ACTR5,ACVR1,ACVR1C,ACVR2B,ACY1,ADAM10,ADAM17,ADAM7,ADAM9,ADAMTS18,ADAMTS3,ADAMTS4,ADAMTS8,ADCK1,ADCY6,ADCY7,ADCYAP1R1,ADD3,ADGRA2,ADGRB3,ADGRE1,ADGRE5,ADGRF5,ADGRL2,ADIPOR2,A…	3067
Cancer,Gastrointestinal Disease,Organismal Injury and Abnormalities	Intestinal cancer	8.3e-64	A4GNT,AAGAB,AAK1,AATK,ABCA1,ABCA2,ABCA5,ABCA8,ABCB10,ABCB4,ABCC8,ABCD2,ABCE1,ABCG1,ABCG5,ABHD13,ABHD14A-ACY1,ABHD14B,ABHD2,ABI2,ABL1,ABL2,ABRA,ACAA2,ACAD11,ACAD8,ACAP2,ACCS,ACE2,ACER3,ACKR3,ACO1,ACOT7,ACOXL,ACP3,ACTA1,ACTR1A,ACTR5,ACVR1,ACVR1C,ACVR2B,ACY1,ADAM10,ADAM17,ADAM7,ADAM9,ADAMTS18,ADAMTS3,ADAMTS4,ADAMTS8,ADCK1,ADCY6,ADCY7,ADCYAP1R1,ADD3,ADGRA2,ADGRB3,ADGRE1,ADGRE5,ADGRF5,ADGRL2,ADIPOR2,A…	3056
Cancer,Gastrointestinal Disease,Organismal Injury and Abnormalities	Malignant neoplasm of large intestine	1.27e-63	A4GNT,AAGAB,AAK1,AATK,ABCA1,ABCA2,ABCA5,ABCA8,ABCB10,ABCB4,ABCC8,ABCD2,ABCE1,ABCG1,ABCG5,ABHD13,ABHD14A-ACY1,ABHD14B,ABHD2,ABI2,ABL1,ABL2,ABRA,ACAA2,ACAD11,ACAD8,ACAP2,ACCS,ACE2,ACER3,ACKR3,ACO1,ACOT7,ACOXL,ACP3,ACTA1,ACTR1A,ACTR5,ACVR1,ACVR1C,ACVR2B,ACY1,ADAM10,ADAM17,ADAM7,ADAM9,ADAMTS18,ADAMTS3,ADAMTS4,ADAMTS8,ADCK1,ADCY6,ADCY7,ADCYAP1R1,ADD3,ADGRA2,ADGRB3,ADGRE1,ADGRE5,ADGRF5,ADGRL2,ADIPOR2,A…	3054
Cancer,Organismal Injury and Abnormalities	Frequency of tumor	7.84e-49	A4GNT,AAK1,AASDHPPT,AATK,ABAT,ABCA1,ABCA2,ABCA5,ABCA8,ABCB4,ABCC8,ABCE1,ABCG5,ABHD14A-ACY1,ABHD14B,ABHD2,ABI2,ABL1,ABL2,ABRAXAS2,ACAD11,ACAD8,ACAP2,ACE2,ACKR3,ACO1,ACOT7,ACP3,ACP5,ACSF2,ACSM1,ACSM3,ACTA1,ACTR2,ACTR5,ACVR1,ACY1,ADAM17,ADAM7,ADAM9,ADAMTS18,ADAMTS3,ADAMTS4,ADAMTS8,ADCK1,ADCY6,ADCYAP1R1,ADD3,ADGRA2,ADGRB3,ADGRE1,ADGRE5,ADGRF5,ADGRL2,ADI1,ADIPOR2,ADK,ADRA2C,AEBP2,AFF4,AFG3L2,AGAP3,AGA…	2586
Cancer,Organismal Injury and Abnormalities	Incidence of tumor	8.47e-49	A4GNT,AAK1,AASDHPPT,AATK,ABAT,ABCA1,ABCA2,ABCA5,ABCA8,ABCB4,ABCC8,ABCE1,ABCG5,ABHD14A-ACY1,ABHD14B,ABHD2,ABI2,ABL1,ABL2,ABRAXAS2,ACAD11,ACAD8,ACAP2,ACE2,ACKR3,ACO1,ACOT7,ACP3,ACP5,ACSF2,ACSM1,ACSM3,ACTA1,ACTR2,ACTR5,ACVR1,ACY1,ADAM10,ADAM17,ADAM7,ADAM9,ADAMTS18,ADAMTS3,ADAMTS4,ADAMTS8,ADCK1,ADCY6,ADCYAP1R1,ADD3,ADGRA2,ADGRB3,ADGRE1,ADGRE5,ADGRF5,ADGRL2,ADI1,ADIPOR2,ADK,ADRA2B,ADRA2C,ADRB1,AEBP2,A…	2656
Cancer,Organismal Injury and Abnormalities	Development of malignant tumor	4.44e-47	A4GNT,AAK1,AASDHPPT,AATK,ABAT,ABCA1,ABCA2,ABCA5,ABCA8,ABCB4,ABCC8,ABCE1,ABCG5,ABHD14A-ACY1,ABHD14B,ABHD2,ABI2,ABL1,ABL2,ABRAXAS2,ACAD11,ACAD8,ACAP2,ACE2,ACKR3,ACO1,ACOT7,ACP3,ACP5,ACSM1,ACSM3,ACTA1,ACTR2,ACTR5,ACVR1,ACY1,ADAM17,ADAM7,ADAM9,ADAMTS18,ADAMTS3,ADAMTS4,ADAMTS8,ADCK1,ADCY6,ADCYAP1R1,ADD3,ADGRA2,ADGRB3,ADGRE1,ADGRE5,ADGRF5,ADGRL2,ADI1,ADIPOR2,ADK,ADRA2C,AEBP2,AFF4,AFG3L2,AGAP3,AGAP5 (in…	2541
Cancer,Organismal Injury and Abnormalities	Tumorigenesis of epithelial neoplasm	5.59e-47	A4GNT,AAK1,AASDHPPT,AATK,ABCA1,ABCA2,ABCA5,ABCA8,ABCB4,ABCC8,ABCE1,ABCG5,ABHD14A-ACY1,ABHD14B,ABHD2,ABI2,ABL1,ABL2,ABRAXAS2,ACAD11,ACAD8,ACAP2,ACE2,ACKR3,ACO1,ACOT7,ACP3,ACP5,ACSF2,ACSM1,ACSM3,ACTA1,ACTR2,ACTR5,ACVR1,ACY1,ADAM17,ADAM7,ADAM9,ADAMTS18,ADAMTS3,ADAMTS4,ADAMTS8,ADCK1,ADCY6,ADCYAP1R1,ADD3,ADGRA2,ADGRB3,ADGRE1,ADGRE5,ADGRF5,ADGRL2,ADI1,ADIPOR2,ADK,ADRA2C,AEBP2,AFF4,AFG3L2,AGAP3,AGAP5 (i…	2544
Cancer,Organismal Injury and Abnormalities	Development of carcinoma	1.85e-46	A4GNT,AAK1,AASDHPPT,AATK,ABCA1,ABCA2,ABCA5,ABCA8,ABCB4,ABCC8,ABCE1,ABCG5,ABHD14A-ACY1,ABHD14B,ABHD2,ABI2,ABL1,ABL2,ABRAXAS2,ACAD11,ACAD8,ACAP2,ACE2,ACKR3,ACO1,ACOT7,ACP3,ACP5,ACSM1,ACSM3,ACTA1,ACTR2,ACTR5,ACVR1,ACY1,ADAM17,ADAM7,ADAM9,ADAMTS18,ADAMTS3,ADAMTS4,ADAMTS8,ADCK1,ADCY6,ADCYAP1R1,ADD3,ADGRA2,ADGRB3,ADGRE1,ADGRE5,ADGRF5,ADGRL2,ADI1,ADIPOR2,ADK,ADRA2C,AEBP2,AFF4,AFG3L2,AGAP3,AGAP5 (include…	2511
Cancer,Organismal Injury and Abnormalities	Malignant genitourinary solid tumor	1.03e-41	AAK1,AASDHPPT,AATK,ABAT,ABCA1,ABCA2,ABCA5,ABCA8,ABCB4,ABCC8,ABCE1,ABCG5,ABHD10,ABHD13,ABHD14A-ACY1,ABHD2,ABI2,ABL1,ABL2,ACAD11,ACAD8,ACE2,ACO1,ACOT7,ACP3,ACP5,ACSF2,ACSM1,ACSM3,ACTR1A,ACTR2,ACVR1,ACY1,ACY3,ADAM10,ADAM17,ADAM7,ADAM9,ADAMTS18,ADAMTS3,ADAMTS4,ADAMTS8,ADCK1,ADCY6,ADCY7,ADCYAP1R1,ADD3,ADGRA2,ADGRB3,ADGRE1,ADGRE5,ADGRF5,ADI1,ADIPOR2,ADK,ADRA2B,ADRA2C,ADRB1,AEBP2,AFF4,AFG3L2,AGAP3,AGBL4…	2553
Cancer,Organismal Injury and Abnormalities	Genitourinary tumor	9.76e-41	AAK1,AASDHPPT,AATK,ABAT,ABCA1,ABCA2,ABCA5,ABCA8,ABCB4,ABCC8,ABCE1,ABCG5,ABHD10,ABHD13,ABHD14A-ACY1,ABHD2,ABI2,ABL1,ABL2,ACAD11,ACAD8,ACE2,ACO1,ACOT7,ACP3,ACP5,ACSF2,ACSM1,ACSM3,ACTR1A,ACTR2,ACVR1,ACY1,ACY3,ADAM10,ADAM17,ADAM7,ADAM9,ADAMTS18,ADAMTS3,ADAMTS4,ADAMTS8,ADCK1,ADCY6,ADCY7,ADCYAP1R1,ADD3,ADGRA2,ADGRB3,ADGRE1,ADGRE5,ADGRF5,ADI1,ADIPOR2,ADK,ADRA2B,ADRA2C,ADRB1,AEBP2,AFF4,AFG3L2,AGAP3,AGBL4…	2589
Cancer,Organismal Injury and Abnormalities	Genitourinary carcinoma	1.6e-38	AAK1,AASDHPPT,ABAT,ABCA1,ABCA2,ABCA5,ABCA8,ABCB4,ABCC8,ABCE1,ABCG5,ABHD13,ABHD14A-ACY1,ABHD2,ABI2,ABL1,ABL2,ACAD11,ACAD8,ACE2,ACOT7,ACP3,ACP5,ACSF2,ACSM1,ACSM3,ACTR1A,ACTR2,ACVR1,ACY1,ACY3,ADAM10,ADAM17,ADAM7,ADAM9,ADAMTS18,ADAMTS3,ADAMTS4,ADCY6,ADCY7,ADCYAP1R1,ADD3,ADGRA2,ADGRB3,ADGRE1,ADGRE5,ADGRF5,ADI1,ADIPOR2,ADRA2B,ADRA2C,ADRB1,AEBP2,AFF4,AFG3L2,AGBL4,AGFG2,AGL,AGO1,AGPAT4,AGPAT5,AGPS,AHCYL1…	2251
Cancer,Organismal Injury and Abnormalities	Anogenital cancer	4.48e-36	AAK1,AASDHPPT,AATK,ABAT,ABCA1,ABCA2,ABCA5,ABCA8,ABCB4,ABCC8,ABCE1,ABCG5,ABHD10,ABHD13,ABHD14A-ACY1,ABHD2,ABI2,ABL1,ABL2,ACAD11,ACAD8,ACE2,ACO1,ACOT7,ACP3,ACP5,ACSF2,ACSM1,ACSM3,ACTR1A,ACTR2,ACVR1,ACY1,ACY3,ADAM10,ADAM17,ADAM7,ADAM9,ADAMTS18,ADAMTS3,ADAMTS4,ADAMTS8,ADCK1,ADCY6,ADCY7,ADCYAP1R1,ADD3,ADGRA2,ADGRB3,ADGRE1,ADGRE5,ADGRF5,ADI1,ADIPOR2,ADK,ADRA2B,ADRA2C,ADRB1,AGAP3,AGBL4,AGL,AGO1,AGPAT4,A…	2355
Cancer,Organismal Injury and Abnormalities	Genitourinary adenocarcinoma	1.61e-35	AAK1,AASDHPPT,ABAT,ABCA1,ABCA5,ABCA8,ABCB4,ABCC8,ABCE1,ABHD13,ABHD14A-ACY1,ABHD2,ABI2,ABL1,ABL2,ACAD11,ACAD8,ACE2,ACOT7,ACP3,ACP5,ACSF2,ACSM1,ACSM3,ACTR1A,ACTR2,ACVR1,ACY1,ACY3,ADAM10,ADAM17,ADAM7,ADAM9,ADAMTS4,ADCY6,ADCY7,ADCYAP1R1,ADD3,ADGRA2,ADGRB3,ADGRE1,ADGRE5,ADGRF5,ADIPOR2,ADRA2B,ADRA2C,ADRB1,AEBP2,AGBL4,AGL,AGO1,AGPAT4,AGPAT5,AGPS,AHCYL1,AHRR,AIFM1,AJAP1,AJUBA,AK3,AKAP11,AKAP12,AKR1C1/AKR…	2012
Cancer,Organismal Injury and Abnormalities	Melanoma	3.38e-34	A4GALT,A4GNT,AAK1,AATK,ABAT,ABCA2,ABCA5,ABCA8,ABCB10,ABCB4,ABCC8,ABCD2,ABCG1,ABI2,ABL1,ABL2,ABRA,ACAD11,ACAP2,ACCS,ACE2,ACKR3,ACO1,ACOXL,ACP3,ACP5,ACSF2,ACSM1,ACSM3,ACSM5,ACSM6,ACTR5,ACVR1C,ACY3,ADAM10,ADAM17,ADAM7,ADAM9,ADAMTS18,ADAMTS3,ADAMTS4,ADAMTS8,ADCK1,ADCY6,ADCY7,ADCYAP1R1,ADD3,ADGRB3,ADGRE1,ADGRE5,ADGRF5,ADGRL2,ADIPOR2,ADK,AEBP2,AEN,AFF4,AGBL4,AGFG1,AGL,AGO1,AGPAT4,AGPAT5,AGPS,AHCYL1,AHI…	2480
Cancer,Organismal Injury and Abnormalities	Pelvic tumor	6.01e-33	AAK1,AASDHPPT,AATK,ABAT,ABCA1,ABCA2,ABCA5,ABCA8,ABCB4,ABCC8,ABCE1,ABCG5,ABHD13,ABHD14A-ACY1,ABHD2,ABI2,ABL1,ABL2,ACAD11,ACAD8,ACE2,ACO1,ACOT7,ACP3,ACP5,ACSF2,ACSM1,ACSM3,ACTR1A,ACTR2,ACVR1,ACY1,ACY3,ADAM10,ADAM17,ADAM7,ADAM9,ADAMTS18,ADAMTS3,ADAMTS4,ADCY6,ADCY7,ADCYAP1R1,ADD3,ADGRA2,ADGRB3,ADGRE1,ADGRE5,ADGRF5,ADI1,ADIPOR2,ADRA2B,ADRA2C,ADRB1,AFF4,AFG3L2,AGBL4,AGFG2,AGL,AGO1,AGPAT4,AGPAT5,AGPS,AH…	2273
Cancer,Organismal Injury and Abnormalities	Pelvic cancer	1.05e-32	AAK1,AASDHPPT,AATK,ABAT,ABCA1,ABCA2,ABCA5,ABCA8,ABCB4,ABCC8,ABCE1,ABCG5,ABHD13,ABHD14A-ACY1,ABHD2,ABI2,ABL1,ABL2,ACAD11,ACAD8,ACE2,ACO1,ACOT7,ACP3,ACP5,ACSF2,ACSM1,ACSM3,ACTR1A,ACTR2,ACVR1,ACY1,ACY3,ADAM10,ADAM17,ADAM7,ADAM9,ADAMTS18,ADAMTS3,ADAMTS4,ADCY6,ADCY7,ADCYAP1R1,ADD3,ADGRA2,ADGRB3,ADGRE1,ADGRE5,ADGRF5,ADI1,ADIPOR2,ADRA2B,ADRA2C,ADRB1,AFF4,AFG3L2,AGBL4,AGFG2,AGL,AGO1,AGPAT4,AGPAT5,AGPS,AH…	2240
Cancer,Organismal Injury and Abnormalities	Pelvic adenocarcinoma	3.77e-32	AAK1,AASDHPPT,ABCA1,ABCA5,ABCA8,ABCB4,ABCC8,ABCE1,ABHD13,ABHD14A-ACY1,ABHD2,ABI2,ABL1,ABL2,ACAD11,ACAD8,ACE2,ACOT7,ACP3,ACP5,ACSF2,ACSM1,ACSM3,ACTR1A,ACTR2,ACVR1,ACY1,ACY3,ADAM10,ADAM17,ADAM7,ADAM9,ADAMTS4,ADCY6,ADCY7,ADCYAP1R1,ADD3,ADGRA2,ADGRB3,ADGRE1,ADGRE5,ADGRF5,ADIPOR2,ADRA2B,ADRA2C,ADRB1,AGBL4,AGL,AGO1,AGPAT4,AGPAT5,AGPS,AHCYL1,AHRR,AIFM1,AJAP1,AK3,AKAP11,AKAP12,AKR1C1/AKR1C2,AKTIP,ALDH8A1…	1829
Cancer,Gastrointestinal Disease,Hepatic System Disease,Organismal Injury and Abnormalities	Liver tumor	8.44e-32	AAK1,AATK,ABAT,ABCA1,ABCA2,ABCA5,ABCA8,ABCB4,ABCC8,ABCD2,ABCG1,ABHD14A-ACY1,ABI2,ABL1,ABL2,ACAA2,ACE2,ACKR3,ACO1,ACO2,ACOT7,ACP3,ACSM3,ACTA1,ACTR1A,ACTR2,ACTR5,ACVR1,ACY1,ADAM10,ADAM17,ADAM9,ADAMTS18,ADAMTS3,ADAMTS4,ADCK1,ADGRA2,ADGRB3,ADGRE1,ADGRF5,ADGRL2,ADIPOR2,ADK,ADRA2B,ADRA2C,ADRB1,AFF4,AGAP3,AGAP5 (includes others),AGBL4,AGFG1,AGFG2,AGO1,AGPAT4,AHI1,AHR,AIFM1,AIFM3,AJAP1,AKAP11,AKNAD1,AKR1…	1796
Gastrointestinal Disease,Hepatic System Disease,Organismal Injury and Abnormalities	Liver lesion	2.6e-31	AAK1,AATK,ABAT,ABCA1,ABCA2,ABCA5,ABCA8,ABCB4,ABCC8,ABCD2,ABCG1,ABHD14A-ACY1,ABI2,ABL1,ABL2,ACAA2,ACE2,ACKR3,ACO1,ACO2,ACOT7,ACP3,ACSM3,ACTA1,ACTR1A,ACTR2,ACTR5,ACVR1,ACY1,ADAM10,ADAM17,ADAM9,ADAMTS18,ADAMTS3,ADAMTS4,ADCK1,ADGRA2,ADGRB3,ADGRE1,ADGRF5,ADGRL2,ADIPOR2,ADK,ADRA2B,ADRA2C,ADRB1,AFF4,AGAP3,AGAP5 (includes others),AGBL4,AGFG1,AGFG2,AGO1,AGPAT4,AHI1,AHR,AIFM1,AIFM3,AJAP1,AKAP11,AKAP12,AKNA…	1854
Cancer,Organismal Injury and Abnormalities,Reproductive System Disease	Genital tumor	1.24e-30	AAK1,AASDHPPT,AATK,ABAT,ABCA1,ABCA5,ABCA8,ABCB4,ABCC8,ABCE1,ABCG5,ABHD13,ABHD14A-ACY1,ABHD2,ABI2,ABL1,ABL2,ACAD11,ACAD8,ACE2,ACO1,ACOT7,ACP3,ACP5,ACSF2,ACSM1,ACSM3,ACTR1A,ACTR2,ACVR1,ACY1,ACY3,ADAM10,ADAM17,ADAM7,ADAM9,ADAMTS18,ADAMTS3,ADAMTS4,ADCY6,ADCY7,ADCYAP1R1,ADD3,ADGRA2,ADGRB3,ADGRE1,ADGRE5,ADGRF5,ADI1,ADIPOR2,ADRA2B,ADRA2C,ADRB1,AGBL4,AGL,AGO1,AGPAT4,AGPAT5,AGPS,AHCYL1,AHR,AHRR,AIFM1,AJAP…	2125
Cancer,Organismal Injury and Abnormalities,Reproductive System Disease	Genital tract cancer	9.67e-30	AAK1,AASDHPPT,AATK,ABAT,ABCA1,ABCA5,ABCA8,ABCB4,ABCC8,ABCE1,ABCG5,ABHD13,ABHD14A-ACY1,ABHD2,ABI2,ABL1,ABL2,ACAD11,ACAD8,ACE2,ACO1,ACOT7,ACP3,ACP5,ACSF2,ACSM1,ACSM3,ACTR1A,ACTR2,ACVR1,ACY1,ACY3,ADAM10,ADAM17,ADAM7,ADAM9,ADAMTS18,ADAMTS3,ADAMTS4,ADCY6,ADCY7,ADCYAP1R1,ADD3,ADGRA2,ADGRB3,ADGRE1,ADGRE5,ADGRF5,ADI1,ADIPOR2,ADRA2B,ADRA2C,ADRB1,AGBL4,AGL,AGO1,AGPAT4,AGPAT5,AGPS,AHCYL1,AHRR,AIFM1,AJAP1,AK…	2087
Cancer,Gastrointestinal Disease,Organismal Injury and Abnormalities	Hepatobiliary carcinoma	1.13e-29	AATK,ABAT,ABCA1,ABCA2,ABCA5,ABCA8,ABCB4,ABCC8,ABCD2,ABCG1,ABHD14A-ACY1,ABL1,ABL2,ACAA2,ACE2,ACKR3,ACO1,ACO2,ACOT7,ACP3,ACSM3,ACTR1A,ACTR5,ACVR1,ACY1,ADAM10,ADAM17,ADAM9,ADAMTS18,ADAMTS3,ADAMTS4,ADCK1,ADGRB3,ADGRE1,ADIPOR2,ADK,ADRA2B,ADRB1,AFF4,AGAP3,AGBL4,AGFG1,AGFG2,AGPAT4,AHI1,AHR,AIFM1,AIFM3,AJAP1,AKAP11,AKNAD1,AKR1C1/AKR1C2,AKTIP,ALCAM,ALDH8A1,ALKAL2,ALS2,AMIGO2,ANGPTL1,ANGPTL6,ANK3,ANKFY1,AN…	1591
Dermatological Diseases and Conditions,Organismal Injury and Abnormalities	Skin lesion	3.56e-28	A4GALT,A4GNT,AAK1,AATK,ABAT,ABCA2,ABCA5,ABCA8,ABCB10,ABCB4,ABCC8,ABCD2,ABCG1,ABI2,ABL1,ABL2,ABRA,ACAD11,ACAP2,ACCS,ACE2,ACKR3,ACO1,ACOXL,ACP3,ACP5,ACSF2,ACSM1,ACSM3,ACSM5,ACSM6,ACTR5,ACVR1C,ACY3,ADAM10,ADAM7,ADAM9,ADAMTS18,ADAMTS3,ADAMTS4,ADAMTS8,ADCK1,ADCY6,ADCYAP1R1,ADD3,ADGRB3,ADGRE1,ADGRE5,ADGRF5,ADGRL2,ADIPOR2,ADK,ADRA2B,ADRA2C,ADRB1,AEBP2,AEN,AFF4,AGBL4,AGFG1,AGL,AGO1,AGPAT4,AGPAT5,AGPS,AHC…	2247
Cancer,Dermatological Diseases and Conditions,Organismal Injury and Abnormalities	Skin tumor	1.23e-27	A4GALT,A4GNT,AAK1,AATK,ABAT,ABCA2,ABCA5,ABCA8,ABCB10,ABCB4,ABCC8,ABCD2,ABCG1,ABI2,ABL1,ABL2,ABRA,ACAD11,ACAP2,ACCS,ACE2,ACKR3,ACO1,ACOXL,ACP3,ACP5,ACSF2,ACSM1,ACSM3,ACSM5,ACSM6,ACTR5,ACVR1C,ACY3,ADAM10,ADAM7,ADAM9,ADAMTS18,ADAMTS4,ADAMTS8,ADCK1,ADCY6,ADCYAP1R1,ADD3,ADGRB3,ADGRE1,ADGRE5,ADGRF5,ADGRL2,ADIPOR2,ADK,AEBP2,AEN,AFF4,AGBL4,AGFG1,AGL,AGO1,AGPAT4,AGPAT5,AGPS,AHCYL1,AHI1,AHR,AIFM3,AIPL1,AJU…	2226
Cancer,Gastrointestinal Disease,Hepatic System Disease,Organismal Injury and Abnormalities	Liver carcinoma	2.51e-27	AATK,ABAT,ABCA1,ABCA2,ABCA5,ABCA8,ABCB4,ABCC8,ABCD2,ABCG1,ABHD14A-ACY1,ABL1,ABL2,ACAA2,ACKR3,ACO1,ACO2,ACOT7,ACP3,ACSM3,ACTR1A,ACTR5,ACVR1,ACY1,ADAM10,ADAM17,ADAM9,ADAMTS18,ADAMTS3,ADAMTS4,ADCK1,ADGRB3,ADGRE1,ADIPOR2,ADK,ADRB1,AFF4,AGAP3,AGBL4,AGFG1,AGFG2,AGPAT4,AHI1,AHR,AIFM1,AIFM3,AJAP1,AKNAD1,AKR1C1/AKR1C2,AKTIP,ALCAM,ALDH8A1,ALKAL2,ALS2,AMIGO2,ANGPTL1,ANGPTL6,ANK3,ANKFY1,ANKHD1/ANKHD1-EIF4EBP…	1500
Cancer,Gastrointestinal Disease,Hepatic System Disease,Organismal Injury and Abnormalities	Hepatobiliary system cancer	5.07e-27	AATK,ABAT,ABCA1,ABCA2,ABCA5,ABCA8,ABCB4,ABCC8,ABCD2,ABCG1,ABHD14A-ACY1,ABL1,ABL2,ACAA2,ACE2,ACKR3,ACO1,ACO2,ACOT7,ACP3,ACSM3,ACTR1A,ACTR5,ACVR1,ACY1,ADAM10,ADAM17,ADAM9,ADAMTS18,ADAMTS3,ADAMTS4,ADCK1,ADGRB3,ADGRE1,ADIPOR2,ADK,ADRA2B,ADRA2C,ADRB1,AFF4,AGAP3,AGBL4,AGFG1,AGFG2,AGPAT4,AHI1,AHR,AIFM1,AIFM3,AJAP1,AKAP11,AKNAD1,AKR1C1/AKR1C2,AKTIP,ALCAM,ALDH8A1,ALKAL2,ALS2,AMIGO2,ANG,ANGPT2,ANGPTL1,ANGP…	1624
Cancer,Organismal Injury and Abnormalities,Reproductive System Disease	Breast or gynecological cancer	1.43e-26	AAK1,AASDHPPT,ABAT,ABCA1,ABCA2,ABCA5,ABCA8,ABCB4,ABCC8,ABCE1,ABCG5,ABHD10,ABHD14A-ACY1,ABHD2,ABI2,ABL1,ABL2,ACAD11,ACAD8,ACE2,ACP3,ACP5,ACSM1,ACSM3,ACTR2,ACVR1,ACY1,ADAM10,ADAM17,ADAM7,ADAM9,ADAMTS18,ADAMTS3,ADAMTS4,ADAMTS8,ADCK1,ADCY6,ADCYAP1R1,ADD3,ADGRB3,ADGRE1,ADGRF5,ADI1,ADIPOR2,ADK,ADRA2C,ADRB1,AGAP3,AGBL4,AGL,AGO1,AGPAT4,AGPS,AHCYL1,AHRR,AIFM1,AIPL1,AJAP1,AJUBA,AK3,AKAP11,AKAP12,AKR1C1/AKR…	1826
Cancer,Gastrointestinal Disease,Organismal Injury and Abnormalities	Development of digestive organ tumor	1.99e-26	A4GNT,AATK,ABCA1,ABCA2,ABCA5,ABCA8,ABCB4,ABCC8,ABCE1,ABCG5,ABHD14B,ABHD2,ABI2,ABL1,ABL2,ACAD11,ACAP2,ACE2,ACKR3,ACO1,ACOT7,ACP3,ACTA1,ACTR5,ACVR1,ADAM17,ADAM7,ADAM9,ADAMTS18,ADAMTS4,ADAMTS8,ADCK1,ADD3,ADGRA2,ADGRB3,ADGRE1,ADGRE5,ADGRF5,ADGRL2,ADIPOR2,ADK,ADRA2C,AFF4,AFG3L2,AGAP3,AGAP5 (includes others),AGL,AGO1,AGPAT5,AHI1,AHR,AHRR,AJAP1,AK3,AKAP12,AKR1C1/AKR1C2,AKTIP,ALCAM,ALDH8A1,ALG10B,ALK,ALK…	1720
Cancer,Organismal Injury and Abnormalities	Development of adenocarcinoma	3.07e-26	A4GNT,AAK1,AASDHPPT,ABCA1,ABCA5,ABCA8,ABCB4,ABCC8,ABCE1,ABHD14A-ACY1,ABHD2,ABI2,ABL1,ABL2,ABRAXAS2,ACAD11,ACAD8,ACE2,ACOT7,ACP3,ACP5,ACSM1,ACSM3,ACTR2,ACVR1,ACY1,ADAM7,ADAM9,ADAMTS3,ADCY6,ADCYAP1R1,ADD3,ADGRB3,ADGRE1,ADGRF5,ADGRL2,ADIPOR2,AEBP2,AGBL4,AGFG2,AGL,AGO1,AGPAT4,AGPS,AHCYL1,AHR,AHRR,AIFM1,AIPL1,AJAP1,AJUBA,AK3,AKAP11,AKR1C1/AKR1C2,AKTIP,ALDH8A1,ALG10B,ALG11,ALK,ALKBH3,ALOX5,ALS2,AMACR,A…	1625
Cancer,Dermatological Diseases and Conditions,Organismal Injury and Abnormalities	Skin cancer	3.25e-26	A4GALT,A4GNT,AAK1,AATK,ABAT,ABCA2,ABCA5,ABCA8,ABCB10,ABCB4,ABCC8,ABCD2,ABCG1,ABI2,ABL1,ABL2,ABRA,ACAD11,ACAP2,ACCS,ACE2,ACKR3,ACO1,ACOXL,ACP3,ACP5,ACSF2,ACSM1,ACSM3,ACSM5,ACSM6,ACTR5,ACVR1C,ACY3,ADAM10,ADAM7,ADAM9,ADAMTS18,ADAMTS4,ADAMTS8,ADCK1,ADCY6,ADCYAP1R1,ADD3,ADGRB3,ADGRE1,ADGRE5,ADGRF5,ADGRL2,ADIPOR2,ADK,AEBP2,AEN,AFF4,AGBL4,AGFG1,AGL,AGO1,AGPAT4,AGPAT5,AGPS,AHCYL1,AHI1,AHR,AIFM3,AIPL1,AJU…	2206
Cancer,Organismal Injury and Abnormalities,Reproductive System Disease	Female genital tract adenocarcinoma	3.49e-26	AAK1,AASDHPPT,ABCA1,ABCA5,ABCA8,ABCB4,ABCC8,ABCE1,ABHD14A-ACY1,ABHD2,ABI2,ABL1,ACAD11,ACAD8,ACE2,ACP3,ACP5,ACSM1,ACSM3,ACTR2,ACVR1,ACY1,ADAM7,ADAM9,ADCY6,ADCYAP1R1,ADD3,ADGRB3,ADGRE1,ADGRF5,ADIPOR2,AGBL4,AGL,AGO1,AGPAT4,AGPS,AHCYL1,AHRR,AIFM1,AJAP1,AK3,AKAP11,AKR1C1/AKR1C2,AKTIP,ALDH8A1,ALG10B,ALG11,ALK,ALKBH3,ALOX5,ALS2,ANGPT2,ANK3,ANKIB1,ANKRD27,ANKRD36,ANKRD44,ANKRD50,ANKRD52,ANKRD55,ANLN,ANP3…	1235
Nervous System Development and Function	Morphology of nervous system	7.03e-26	AATK,ABCA2,ABCD2,ABI2,ABL1,ABL2,ADAM10,ADAM9,ADAMTS4,ADCYAP1R1,ADGRA2,AHI1,AHR,AIFM1,AIPL1,AKAP12,AKAP5,AKTIP,ALK,ALS2,ANK3,AP3M2,AP4E1,APBB2,ARC,ARL6,ATAT1,ATF2,ATM,ATXN1,ATXN1L,ATXN3,B2M,B4GALNT1,BACE1,BAG6,BAK1,BCAS1,BCL2,BCL2L11,BCR,BDNF,BHLHE22,BID,BMP2,BMPR1A,BMPR1B,BTG1,CACNA1C,CACNA2D2,CACNG8,CALB1,CAMK4,CAMKK2,CANX,CAPRIN1,CASP2,CASP9,CAV1,CBLN3,CCDC88A,CCND2,CCP110,CD200,CD2AP,CD46,CD47…	456
Cancer,Organismal Injury and Abnormalities	Malignant solid organ tumor	8.56e-26	A4GALT,A4GNT,AAK1,AATK,ABAT,ABCA2,ABCA5,ABCA8,ABCB10,ABCB4,ABCC8,ABCD2,ABCG1,ABI2,ABL1,ABL2,ABRA,ACAD11,ACAP2,ACCS,ACE2,ACKR3,ACO1,ACOXL,ACP3,ACP5,ACSF2,ACSM1,ACSM3,ACSM5,ACSM6,ACTR5,ACVR1C,ACY3,ADAM10,ADAM7,ADAM9,ADAMTS18,ADAMTS4,ADAMTS8,ADCK1,ADCY6,ADCYAP1R1,ADD3,ADGRB3,ADGRE1,ADGRE5,ADGRF5,ADGRL2,ADIPOR2,ADK,AEBP2,AEN,AFF4,AGBL4,AGFG1,AGL,AGO1,AGPAT4,AGPAT5,AGPS,AHCYL1,AHI1,AHR,AIFM3,AIPL1,AJU…	2237
Cell Death and Survival	Necrosis	1.57e-25	A4GALT,AAK1,AARS1,AATK,ABCB4,ABCE1,ABCG1,ABL1,ABL2,ACE2,ACER2,ACER3,ACKR3,ACO2,ACSM5,ACVR1C,ACVR2B,ADAM10,ADAM17,ADAMTS3,ADCYAP1R1,ADGRL2,ADI1,ADIPOR2,ADRB1,AGAP3,AHR,AIFM1,AIFM3,AKAP12,AKTIP,ALCAM,ALK,ALKBH3,ALOX5,ALS2,AMACR,AMIGO2,ANG,ANGPT2,ANGPTL1,ANKZF1,AP2A2,AP2B1,APLN,APOBEC3B,APOC3,APRT,AQP11,AQP7,ARCN1,ARHGAP18,ARHGEF3,ARID5B,AS3MT,ASB11,ATAD2,ATF1,ATF2,ATF3,ATF5,ATF7,ATG10,ATG12,ATG16L1…	1059
Cellular Assembly and Organization,Cellular Function and Maintenance	Organization of cytoplasm	6.61e-25	AATK,ABCA1,ABI2,ABL1,ABL2,ACAP2,ACTR2,ADAM10,ADAMTS3,ADAMTS4,ADGRB3,ADGRF5,ADI1,AFG3L2,AGFG1,AHI1,AHR,AJUBA,AKAP11,AKAP12,AKAP5,AKIRIN1,AKTIP,ALS2,ANGPT2,ANK3,ANKRD27,ANXA8/ANXA8L1,ARC,ARHGAP12,ARHGAP17,ARHGAP18,ARHGAP21,ARHGAP32,ARHGAP6,ARHGEF18,ARHGEF2,ARL13B,ARL6,ARPC5,ATAT1,ATCAY,ATF3,ATL1,ATL2,ATP2C1,ATP5F1B,ATP6V1D,ATXN1,ATXN3,AURKA,AURKB,AURKC,AVIL,B4GALT6,B4GAT1,BACE1,BAG4,BAG5,BASP1,BBS1…	670
Cancer,Gastrointestinal Disease,Hepatic System Disease,Organismal Injury and Abnormalities	Liver cancer	7.52e-25	AATK,ABAT,ABCA1,ABCA2,ABCA5,ABCA8,ABCB4,ABCC8,ABCD2,ABCG1,ABHD14A-ACY1,ABL1,ABL2,ACAA2,ACKR3,ACO1,ACO2,ACOT7,ACP3,ACSM3,ACTR1A,ACTR5,ACVR1,ACY1,ADAM10,ADAM17,ADAM9,ADAMTS18,ADAMTS3,ADAMTS4,ADCK1,ADGRB3,ADGRE1,ADIPOR2,ADK,ADRA2B,ADRA2C,ADRB1,AFF4,AGAP3,AGBL4,AGFG1,AGFG2,AGPAT4,AHI1,AHR,AIFM1,AIFM3,AJAP1,AKNAD1,AKR1C1/AKR1C2,AKTIP,ALCAM,ALDH8A1,ALKAL2,ALS2,AMIGO2,ANG,ANGPT2,ANGPTL1,ANGPTL6,ANK3,ANK…	1535
Cancer,Organismal Injury and Abnormalities,Reproductive System Disease	Development of genital tumor	1.85e-24	AAK1,AASDHPPT,ABAT,ABCA1,ABCA5,ABCA8,ABCB4,ABCC8,ABCE1,ABCG5,ABHD14A-ACY1,ABHD2,ABI2,ABL1,ACAD11,ACAD8,ACE2,ACP3,ACP5,ACSM1,ACSM3,ACTR2,ACVR1,ACY1,ADAM10,ADAM7,ADAM9,ADAMTS18,ADCY6,ADCYAP1R1,ADD3,ADGRB3,ADGRE1,ADGRE5,ADGRF5,ADI1,ADIPOR2,ADRA2B,ADRA2C,ADRB1,AGBL4,AGL,AGO1,AGPAT4,AGPS,AHCYL1,AHR,AHRR,AIFM1,AJAP1,AK3,AKAP11,AKR1C1/AKR1C2,AKTIP,ALDH8A1,ALG10B,ALG11,ALK,ALKBH3,ALOX5,ALS2,ANGPT2,ANK3,A…	1442
Cancer,Gastrointestinal Disease,Organismal Injury and Abnormalities	Development of intestinal tumor	2.12e-24	AATK,ABCA2,ABCA5,ABCA8,ABCC8,ABCE1,ABCG5,ABHD14B,ABHD2,ABI2,ABL1,ABL2,ACAD11,ACAP2,ACE2,ACKR3,ACOT7,ACP3,ACTA1,ACTR5,ACVR1,ADAM17,ADAMTS18,ADAMTS4,ADAMTS8,ADD3,ADGRA2,ADGRB3,ADGRE1,ADGRE5,ADGRF5,ADGRL2,ADIPOR2,ADK,ADRA2C,AFF4,AFG3L2,AGAP3,AGAP5 (includes others),AGL,AGPAT5,AHI1,AHRR,AJAP1,AK3,AKAP12,AKR1C1/AKR1C2,AKTIP,ALDH8A1,ALG10B,ALK,ALKBH3,ALOX5,ALS2,AMACR,AMMECR1,AMOTL2,ANAPC1,ANGPT2,ANK3,A…	1524
Cancer,Gastrointestinal Disease,Organismal Injury and Abnormalities	Development of colorectal tumor	2.27e-24	AATK,ABCA2,ABCA5,ABCA8,ABCC8,ABCE1,ABCG5,ABHD14B,ABHD2,ABI2,ABL1,ABL2,ACAD11,ACAP2,ACE2,ACKR3,ACOT7,ACP3,ACTA1,ACTR5,ACVR1,ADAM17,ADAMTS18,ADAMTS4,ADAMTS8,ADD3,ADGRA2,ADGRB3,ADGRE1,ADGRE5,ADGRF5,ADGRL2,ADIPOR2,ADK,ADRA2C,AFF4,AFG3L2,AGAP3,AGAP5 (includes others),AGL,AGPAT5,AHI1,AHRR,AJAP1,AK3,AKAP12,AKR1C1/AKR1C2,AKTIP,ALDH8A1,ALG10B,ALK,ALKBH3,ALOX5,ALS2,AMACR,AMMECR1,AMOTL2,ANAPC1,ANGPT2,ANK3,A…	1523
Cancer,Organismal Injury and Abnormalities,Reproductive System Disease	Female genital neoplasm	3.91e-24	AAK1,AASDHPPT,ABAT,ABCA1,ABCA5,ABCA8,ABCB4,ABCC8,ABCE1,ABCG5,ABHD14A-ACY1,ABHD2,ABI2,ABL1,ACAD11,ACAD8,ACE2,ACP3,ACP5,ACSM1,ACSM3,ACTR2,ACVR1,ACY1,ADAM10,ADAM17,ADAM7,ADAM9,ADAMTS18,ADCY6,ADCYAP1R1,ADD3,ADGRB3,ADGRE1,ADGRE5,ADGRF5,ADI1,ADIPOR2,ADRA2B,ADRA2C,ADRB1,AGBL4,AGL,AGO1,AGPAT4,AGPS,AHCYL1,AHR,AHRR,AIFM1,AJAP1,AK3,AKAP11,AKR1C1/AKR1C2,AKTIP,ALCAM,ALDH8A1,ALG10B,ALG11,ALK,ALKBH3,ALOX5,ALS2,…	1494
Cancer,Organismal Injury and Abnormalities,Reproductive System Disease	Tumorigenesis of reproductive tract	5.48e-24	AAK1,AASDHPPT,ABAT,ABCA1,ABCA5,ABCA8,ABCB4,ABCC8,ABCE1,ABCG5,ABHD14A-ACY1,ABHD2,ABI2,ABL1,ACAD11,ACAD8,ACE2,ACP3,ACP5,ACSM1,ACSM3,ACTR2,ACVR1,ACY1,ADAM10,ADAM17,ADAM7,ADAM9,ADAMTS18,ADCY6,ADCYAP1R1,ADD3,ADGRB3,ADGRE1,ADGRE5,ADGRF5,ADI1,ADIPOR2,ADRA2B,ADRA2C,ADRB1,AGBL4,AGL,AGO1,AGPAT4,AGPS,AHCYL1,AHR,AHRR,AIFM1,AJAP1,AK3,AKAP11,AKR1C1/AKR1C2,AKTIP,ALCAM,ALDH8A1,ALG10B,ALG11,ALK,ALKBH3,ALOX5,ALS2,…	1490
Cancer,Gastrointestinal Disease,Organismal Injury and Abnormalities	Colorectal carcinoma	6.78e-24	AATK,ABCA2,ABCA5,ABCA8,ABCC8,ABCE1,ABCG5,ABHD14B,ABHD2,ABI2,ABL1,ABL2,ACAD11,ACAP2,ACE2,ACKR3,ACOT7,ACP3,ACTA1,ACTR5,ACVR1,ADAM17,ADAMTS18,ADAMTS4,ADAMTS8,ADD3,ADGRA2,ADGRB3,ADGRE1,ADGRE5,ADGRF5,ADGRL2,ADIPOR2,ADK,ADRA2C,AFF4,AFG3L2,AGAP3,AGAP5 (includes others),AGL,AGPAT5,AHI1,AHRR,AJAP1,AK3,AKAP12,AKR1C1/AKR1C2,AKTIP,ALDH8A1,ALG10B,ALK,ALKBH3,ALOX5,ALS2,AMACR,AMMECR1,AMOTL2,ANAPC1,ANGPT2,ANK3,A…	1519
Cancer,Gastrointestinal Disease,Organismal Injury and Abnormalities	Colon tumor	4.94e-23	AATK,ABCA2,ABCA5,ABCA8,ABCC8,ABCE1,ABCG5,ABHD14B,ABHD2,ABI2,ABL1,ABL2,ACAD11,ACAP2,ACE2,ACKR3,ACOT7,ACP3,ACTA1,ACTR5,ACVR1,ADAM10,ADAM17,ADAMTS18,ADAMTS4,ADAMTS8,ADD3,ADGRA2,ADGRB3,ADGRE1,ADGRE5,ADGRF5,ADGRL2,ADIPOR2,ADK,ADRA2C,AFF4,AFG3L2,AGAP3,AGAP5 (includes others),AGL,AGPAT5,AHI1,AHRR,AJAP1,AK3,AKAP12,AKTIP,ALDH8A1,ALG10B,ALK,ALKBH3,ALOX5,ALS2,AMACR,AMMECR1,AMOTL2,ANAPC1,ANGPT2,ANK3,ANKFY1,A…	1525
Cancer,Organismal Injury and Abnormalities	Breast or colorectal cancer	1.57e-22	AATK,ABAT,ABCA1,ABCA2,ABCA5,ABCA8,ABCC8,ABCE1,ABCG5,ABHD10,ABHD14B,ABHD2,ABI2,ABL1,ABL2,ACAD11,ACAP2,ACE2,ACKR3,ACOT7,ACP3,ACP5,ACTA1,ACTR5,ACVR1,ADAM10,ADAM17,ADAM9,ADAMTS18,ADAMTS3,ADAMTS4,ADAMTS8,ADCK1,ADCY6,ADD3,ADGRA2,ADGRB3,ADGRE1,ADGRE5,ADGRF5,ADGRL2,ADIPOR2,ADK,ADRA2C,ADRB1,AFF4,AFG3L2,AGAP3,AGAP5 (includes others),AGL,AGPAT5,AHI1,AHRR,AIPL1,AJAP1,AJUBA,AK3,AKAP12,AKR1C1/AKR1C2,AKTIP,ALCA…	2014
Cancer,Gastrointestinal Disease,Organismal Injury and Abnormalities	Colon cancer	1.93e-22	AATK,ABCA2,ABCA5,ABCA8,ABCC8,ABCE1,ABCG5,ABHD14B,ABHD2,ABI2,ABL1,ABL2,ACAD11,ACAP2,ACE2,ACKR3,ACOT7,ACP3,ACTA1,ACTR5,ACVR1,ADAM10,ADAM17,ADAMTS18,ADAMTS4,ADAMTS8,ADD3,ADGRA2,ADGRB3,ADGRE1,ADGRE5,ADGRF5,ADGRL2,ADIPOR2,ADK,ADRA2C,AFF4,AFG3L2,AGAP3,AGAP5 (includes others),AGL,AGPAT5,AHI1,AHRR,AJAP1,AK3,AKAP12,AKTIP,ALDH8A1,ALG10B,ALK,ALKBH3,ALOX5,ALS2,AMACR,AMMECR1,AMOTL2,ANAPC1,ANGPT2,ANK3,ANKFY1,A…	1505
Cancer,Organismal Injury and Abnormalities,Reproductive System Disease	Female genital tract cancer	2.64e-22	AAK1,AASDHPPT,ABAT,ABCA1,ABCA5,ABCA8,ABCB4,ABCC8,ABCE1,ABCG5,ABHD14A-ACY1,ABHD2,ABI2,ABL1,ACAD11,ACAD8,ACE2,ACP3,ACP5,ACSM1,ACSM3,ACTR2,ACVR1,ACY1,ADAM10,ADAM17,ADAM7,ADAM9,ADAMTS18,ADCY6,ADCYAP1R1,ADD3,ADGRB3,ADGRE1,ADGRF5,ADI1,ADIPOR2,AGBL4,AGL,AGO1,AGPAT4,AGPS,AHCYL1,AHRR,AIFM1,AJAP1,AK3,AKAP11,AKR1C1/AKR1C2,AKTIP,ALCAM,ALDH8A1,ALG10B,ALG11,ALK,ALKBH3,ALOX5,ALS2,ANG,ANGPT2,ANK3,ANKIB1,ANKRD27,…	1438
Organismal Survival	Organismal death	3.93e-22	A4GALT,ABCA1,ABCA2,ABCA5,ABCB10,ABCB4,ABL1,ABL2,ACE2,ACKR3,ACTA1,ACVR1,ACVR2B,ADAM10,ADAM17,ADAM9,ADAMTS3,ADAMTS4,ADCY7,ADCYAP1R1,ADGRA2,ADGRF5,ADK,ADRA2B,ADRA2C,ADRB1,AFF4,AGL,AHI1,AHR,AIFM1,AKAP12,ALG2,ALK,ALKBH3,ALOX5,AMACR,ANG,ANGPT2,ANGPTL6,ANK3,APBA2,APBB2,APLNR,APRT,AQP11,AQP2,AQP5,ARC,ARF4,ARF5,ARHGEF12,ARID3A,ARID4B,ARID5B,ARL5A,ARL8B,ARPP19,ASPH,ATF1,ATF2,ATF3,ATF7,ATG12,ATG16L1,ATG9A,A…	983
Gene Expression	Transcription of RNA	4.77e-22	ABCA2,ABHD14B,ABL1,ABRA,ACTR2,ACVR1,ACVR1C,ACVR2B,ADRB1,AEBP2,AFF4,AGO1,AHI1,AHR,AHRR,AJUBA,AKAP5,ANG,APBB2,ARF4,ARHGEF2,ARID2,ARID3A,ARID4B,ARID5B,ASCC1,ASPH,ATAD2,ATF1,ATF2,ATF3,ATF5,ATF7,ATF7IP,ATM,ATOH8,ATP2B4,ATP2C1,ATXN1,ATXN1L,ATXN3,ATXN7L3,AURKB,BACH1,BACH2,BAG1,BAHD1,BAP1,BARX2,BASP1,BCL10,BCL2,BCL2L12,BDKRB2,BDNF,BDP1,BEND3,BEX1,BHLHE22,BHLHE40,BHLHE41,BICRA,BID,BIRC2,BLNK,BMP2,BMP3,BMP…	739
Cancer,Gastrointestinal Disease,Organismal Injury and Abnormalities	Colorectal adenocarcinoma	5.61e-22	AATK,ABCA2,ABCA5,ABCA8,ABCC8,ABCE1,ABCG5,ABHD14B,ABHD2,ABI2,ABL1,ABL2,ACAD11,ACAP2,ACE2,ACKR3,ACP3,ACTA1,ACTR5,ACVR1,ADAM17,ADAMTS18,ADAMTS4,ADAMTS8,ADD3,ADGRA2,ADGRB3,ADGRE1,ADGRE5,ADGRF5,ADGRL2,ADIPOR2,ADK,ADRA2C,AFF4,AFG3L2,AGAP3,AGAP5 (includes others),AGL,AGPAT5,AHI1,AHRR,AJAP1,AK3,AKAP12,AKR1C1/AKR1C2,AKTIP,ALDH8A1,ALG10B,ALK,ALKBH3,ALOX5,ALS2,AMACR,AMMECR1,AMOTL2,ANAPC1,ANGPT2,ANK3,ANKFY1,…	1470
Organismal Survival	Morbidity or mortality	9.39e-22	A4GALT,ABCA1,ABCA2,ABCA5,ABCB10,ABCB4,ABCC8,ABL1,ABL2,ACE2,ACKR3,ACTA1,ACVR1,ACVR2B,ADAM10,ADAM17,ADAM9,ADAMTS3,ADAMTS4,ADCY7,ADCYAP1R1,ADGRA2,ADGRE5,ADGRF5,ADK,ADRA2B,ADRA2C,ADRB1,AFF4,AGL,AHI1,AHR,AIFM1,AKAP12,ALG2,ALK,ALKBH3,ALOX5,AMACR,ANG,ANGPT2,ANGPTL6,ANK3,APBA2,APBB2,APLNR,APRT,AQP11,AQP2,AQP5,ARC,ARF4,ARF5,ARHGEF12,ARID3A,ARID4B,ARID5B,ARL5A,ARL8B,ARPP19,ASPH,ATF1,ATF2,ATF3,ATF7,ATG12,AT…	992
Cancer,Dermatological Diseases and Conditions,Organismal Injury and Abnormalities	Cutaneous melanoma	9.92e-22	A4GALT,A4GNT,AAK1,AATK,ABAT,ABCA2,ABCA5,ABCA8,ABCB10,ABCB4,ABCC8,ABCD2,ABCG1,ABI2,ABL1,ABL2,ABRA,ACAD11,ACAP2,ACCS,ACE2,ACKR3,ACO1,ACOXL,ACP3,ACP5,ACSF2,ACSM1,ACSM3,ACSM5,ACSM6,ACTR5,ACVR1C,ACY3,ADAM10,ADAM7,ADAM9,ADAMTS18,ADAMTS4,ADAMTS8,ADCK1,ADCY6,ADCYAP1R1,ADD3,ADGRB3,ADGRE1,ADGRE5,ADGRF5,ADGRL2,ADIPOR2,ADK,AEBP2,AEN,AFF4,AGBL4,AGFG1,AGL,AGO1,AGPAT4,AGPAT5,AGPS,AHCYL1,AHI1,AHR,AIFM3,AIPL1,AJU…	2077
Cell Death and Survival	Apoptosis	1.04e-21	A4GALT,AARS1,AATK,ABCA1,ABCE1,ABCG1,ABL1,ABL2,ABRAXAS2,ACE2,ACER2,ACER3,ACO2,ACSM5,ACVR1C,ACVR2B,ADAM10,ADAM17,ADAMTS3,ADCYAP1R1,ADGRL2,ADI1,ADRB1,AGO1,AHI1,AHR,AIFM1,AIFM3,AIPL1,AKAP12,AKTIP,ALCAM,ALK,ALKBH3,ALOX5,ALS2,AMIGO2,ANGPT2,ANGPTL1,ANKZF1,AP2A2,APBB2,APLN,APOBEC3B,APOC3,APOL6,APPL1,AQP11,AQP2,AQP7,ARF4,ARHGAP18,ARHGEF12,ARHGEF18,ARHGEF2,ARHGEF3,ARID5B,ASB11,ATAD2,ATAT1,ATF1,ATF2,ATF3,AT…	1022
Cancer,Gastrointestinal Disease,Organismal Injury and Abnormalities	Colon carcinoma	2.24e-21	AATK,ABCA2,ABCA8,ABCC8,ABCE1,ABCG5,ABHD14B,ABHD2,ABI2,ABL1,ABL2,ACAD11,ACAP2,ACE2,ACKR3,ACOT7,ACP3,ACTA1,ACTR5,ACVR1,ADAM17,ADAMTS18,ADAMTS4,ADAMTS8,ADD3,ADGRA2,ADGRB3,ADGRE1,ADGRE5,ADGRF5,ADGRL2,ADIPOR2,ADK,ADRA2C,AFF4,AFG3L2,AGAP3,AGAP5 (includes others),AGL,AGPAT5,AHI1,AHRR,AJAP1,AK3,AKAP12,AKTIP,ALDH8A1,ALG10B,ALK,ALKBH3,ALOX5,ALS2,AMACR,AMMECR1,AMOTL2,ANAPC1,ANGPT2,ANK3,ANKFY1,ANKHD1/ANKHD1-…	1433
Nervous System Development and Function,Neurological Disease	Abnormal morphology of nervous system	2.62e-21	AATK,ABCA2,ABCD2,ABI2,ABL1,ABL2,ADAM9,ADAMTS4,ADGRA2,AHI1,AIPL1,AKAP12,ALK,ALS2,ANK3,AP3M2,APBB2,ARL6,ATM,ATXN1,ATXN1L,ATXN3,B2M,B4GALNT1,BACE1,BAG6,BAK1,BCAS1,BCL2,BCL2L11,BCR,BDNF,BHLHE22,BID,BMPR1B,BTG1,CACNA1C,CACNA2D2,CACNG8,CALB1,CAMK4,CAMKK2,CANX,CAPRIN1,CASP2,CASP9,CAV1,CBLN3,CCDC88A,CCND2,CCP110,CD200,CD46,CD47,CD80,CDH11,CDK20,CDK5R1,CDK5R2,CDKN1B,CDKN2C,CDNF,CELSR2,CHL1,CHMP2B,CHRNA6,C…	375
Cellular Assembly and Organization,Cellular Function and Maintenance	Organization of cytoskeleton	3.58e-21	AATK,ABI2,ABL1,ABL2,ACAP2,ACTR2,ADAM10,ADAMTS3,ADAMTS4,ADGRB3,ADGRF5,ADI1,AFG3L2,AGFG1,AHI1,AHR,AJUBA,AKAP11,AKAP12,AKAP5,AKIRIN1,ALS2,ANGPT2,ANK3,ANKRD27,ARC,ARHGAP12,ARHGAP17,ARHGAP18,ARHGAP32,ARHGAP6,ARHGEF18,ARHGEF2,ARL13B,ARL6,ARPC5,ATAT1,ATCAY,ATF3,ATL1,ATP2C1,ATP6V1D,ATXN1,ATXN3,AURKA,AURKB,AURKC,AVIL,B4GALT6,B4GAT1,BACE1,BAG4,BASP1,BBS10,BCL2,BCR,BDNF,BLOC1S6,BMP2,BMP2K,BSN,BTBD3,CALD1,CA…	597
Cancer,Organismal Injury and Abnormalities	Neoplasia of cells	5.76e-21	ABAT,ABCA1,ABCA2,ABCB4,ABCG1,ABCG5,ABL1,ABL2,ABRAXAS2,ACAD11,ACO2,ACOXL,ACP5,ACSM3,ACSM5,ACSM6,ADAM17,ADAM7,ADAM9,ADAMTS18,ADAMTS3,ADCY7,ADCYAP1R1,ADD3,ADGRA2,ADGRB3,ADGRE5,ADGRF5,ADGRL2,ADI1,ADRA2C,ADRB1,AGAP5 (includes others),AGBL4,AGL,AHI1,AHR,AIFM1,AJUBA,AKAP11,AKAP12,AKAP5,AKNAD1,ALAD,ALCAM,ALG10B,ALK,ALKAL2,ALOX5,ALS2,AMACR,AMMECR1,AMMECR1L,ANAPC1,ANG,ANGPT2,ANGPTL1,ANK3,ANKFY1,ANKHD1/ANKH…	1786
Cancer,Gastrointestinal Disease,Organismal Injury and Abnormalities	Colon adenocarcinoma	7.16e-20	AATK,ABCA2,ABCA8,ABCC8,ABCE1,ABCG5,ABHD14B,ABHD2,ABI2,ABL1,ABL2,ACAD11,ACAP2,ACE2,ACKR3,ACP3,ACTA1,ACTR5,ACVR1,ADAM17,ADAMTS18,ADAMTS4,ADAMTS8,ADD3,ADGRA2,ADGRB3,ADGRE1,ADGRE5,ADGRF5,ADGRL2,ADIPOR2,ADK,ADRA2C,AFF4,AFG3L2,AGAP3,AGAP5 (includes others),AGL,AGPAT5,AHI1,AHRR,AJAP1,AK3,AKAP12,AKTIP,ALDH8A1,ALG10B,ALK,ALKBH3,ALOX5,ALS2,AMACR,AMMECR1,AMOTL2,ANAPC1,ANGPT2,ANK3,ANKFY1,ANKHD1/ANKHD1-EIF4EB…	1402
Organismal Development	Morphology of head	1.05e-19	AATK,ABCD2,ABI2,ABL1,ABL2,ADAM17,ADAM9,ADAMTS4,ADGRA2,ADRA2B,ADRA2C,AHI1,AHR,AIFM1,AIPL1,AKAP12,AKTIP,ALK,ALS2,ANK3,AP3M2,AP4E1,APBB2,AQP5,ARL13B,ARL6,ASPH,ATAT1,ATF2,ATM,ATXN1,ATXN1L,B2M,B4GALNT1,BACE1,BAG6,BAK1,BBS10,BCL2,BCL2L11,BCR,BDNF,BFSP1,BHLHE22,BID,BMP2,BMPR1A,BMPR1B,BTG1,CACNA2D2,CACNG8,CALB1,CAMK4,CASP9,CAV1,CBLN3,CCN2,CCN3,CCND2,CCP110,CD46,CDH11,CDK2,CDK20,CDK5R1,CDK5R2,CDKN1B,CDKN2…	453
Cancer,Organismal Injury and Abnormalities	Endometrioid carcinoma	1.32e-19	AAK1,AASDHPPT,ABCA1,ABCA5,ABCA8,ABCB4,ABCC8,ABCE1,ABHD14A-ACY1,ABI2,ABL1,ACAD11,ACAD8,ACE2,ACSM1,ACSM3,ACTR2,ACVR1,ACY1,ADAM7,ADAM9,ADCY6,ADCYAP1R1,ADD3,ADGRB3,ADGRE1,ADGRF5,AGBL4,AGL,AGO1,AGPAT4,AGPS,AHCYL1,AJAP1,AKAP11,AKR1C1/AKR1C2,AKTIP,ALDH8A1,ALG10B,ALG11,ALK,ALKBH3,ALOX5,ALS2,ANGPT2,ANK3,ANKIB1,ANKRD27,ANKRD36,ANKRD44,ANKRD50,ANKRD52,ANKRD55,ANLN,ANP32B,ANP32E,AOC2,AP1S2,AP3B2,AP4E1,APBA2,…	1016
Cell Morphology,Cellular Assembly and Organization,Cellular Function and Maintenance	Formation of cellular protrusions	1.56e-19	ABI2,ABL1,ABL2,ACAP2,ACTR2,ADAM10,ADAMTS3,ADAMTS4,ADGRB3,ADGRF5,AFG3L2,AHI1,AHR,AJUBA,AKAP12,AKAP5,AKIRIN1,ALS2,ANK3,ANKRD27,ARHGAP32,ARL13B,ARL6,ATAT1,ATCAY,ATF3,ATL1,ATP6V1D,ATXN1,AURKA,AVIL,B4GALT6,B4GAT1,BACE1,BASP1,BBS10,BCL2,BCR,BDNF,BLOC1S6,BMP2,BSN,BTBD3,CALD1,CALU,CAMK4,CAMKK2,CAMSAP2,CAPNS1,CAPRIN1,CAV1,CC2D2A,CCDC88A,CCK,CCN2,CCN3,CCP110,CD2AP,CD47,CDC14A,CDC42BPG,CDK18,CDK5R1,CDK5R2,C…	413
Cellular Assembly and Organization,Cellular Function and Maintenance	Microtubule dynamics	2.47e-19	AATK,ABI2,ABL1,ABL2,ACAP2,ACTR2,ADAM10,ADAMTS3,ADAMTS4,ADGRB3,ADGRF5,ADI1,AFG3L2,AHI1,AHR,AJUBA,AKAP11,AKAP12,AKAP5,AKIRIN1,ALS2,ANGPT2,ANK3,ANKRD27,ARC,ARHGAP32,ARHGEF2,ARL13B,ARL6,ATAT1,ATCAY,ATF3,ATL1,ATP2C1,ATP6V1D,ATXN1,ATXN3,AURKA,AURKC,AVIL,B4GALT6,B4GAT1,BACE1,BAG4,BASP1,BBS10,BCL2,BCR,BDNF,BLOC1S6,BMP2,BMP2K,BSN,BTBD3,CALD1,CALU,CAMK4,CAMKK2,CAMSAP2,CANX,CAPNS1,CAPRIN1,CAV1,CAV3,CBL,CBLN…	512
Gene Expression	Expression of RNA	2.92e-19	ABCA2,ABHD14B,ABL1,ABRA,ACO1,ACTR2,ACVR1,ACVR1C,ACVR2B,ADRB1,AEBP2,AFF4,AGO1,AHI1,AHR,AHRR,AJUBA,AKAP5,ANG,ANK3,APBA2,APBB2,APLN,ARF4,ARHGEF2,ARID2,ARID3A,ARID4B,ARID5B,ASCC1,ASPH,ATAD2,ATF1,ATF2,ATF3,ATF5,ATF7,ATF7IP,ATM,ATOH8,ATP2B4,ATP2C1,ATRAID,ATXN1,ATXN1L,ATXN3,ATXN7L3,ATXN7L3B,AURKA,AURKB,BACH1,BACH2,BAG1,BAHD1,BAK1,BAP1,BARX2,BASP1,BCL10,BCL2,BCL2L12,BDKRB2,BDNF,BDP1,BEND3,BEX1,BHLHE22,BH…	899
Gene Expression	Transcription of DNA	3.18e-19	ABCA2,ABHD14B,ABL1,ABRA,ACTR2,ACVR1,ACVR2B,AEBP2,AGO1,AHI1,AHR,AHRR,AJUBA,ANG,APBB2,ARF4,ARHGEF2,ARID2,ARID3A,ARID4B,ARID5B,ASCC1,ASPH,ATAD2,ATF1,ATF2,ATF3,ATF5,ATF7,ATF7IP,ATM,ATOH8,ATP2B4,ATXN1,ATXN1L,ATXN7L3,AURKB,BACH1,BACH2,BAG1,BAHD1,BAP1,BARX2,BASP1,BCL10,BCL2L12,BDP1,BEND3,BEX1,BHLHE22,BHLHE40,BHLHE41,BICRA,BMP2,BMP3,BMP5,BMP6,BMPR1A,BMPR1B,BNC1,BRD3,BTRC,C1D,CALCB,CAMK1,CAMK4,CAMKK2,CAV1…	637
Cardiovascular System Development and Function,Organismal Development	Vasculogenesis	3.21e-19	ABRA,ACE2,ACVR1,ACVR2B,ADAM17,ADAM9,ADAMTS8,ADCY6,ADGRA2,ADIPOR2,ADRA2B,ADRA2C,AHR,ALCAM,ALOX5,AMIGO2,ANG,ANGPT2,ANGPTL1,ANGPTL6,AP1S2,AP2B1,AP3M2,AP3S2,AP4E1,APLN,APLNR,ARID4B,ATF3,ATM,ATOH8,ATP1B3,ATP5IF1,ATXN1,BACE1,BAG4,BCL2,BDKRB2,BDNF,BMP2,BMP6,BMPR1A,CALCB,CAPNS1,CAV1,CAV2,CAVIN2,CBL,CBLL1,CBX2,CCN2,CCNE2,CD151,CD28,CDK2,CDK6,CDKN1B,CEBPD,CHD7,CITED2,CLEC1B,CLIC4,CNMD,COL13A1,COL4A2,CREB1,…	356
Gene Expression	Transcription	4.83e-19	ABCA2,ABHD14B,ABL1,ABRA,ACO1,ACTR2,ACVR1,ACVR1C,ACVR2B,ADRB1,AEBP2,AFF4,AGO1,AHI1,AHR,AHRR,AJUBA,AKAP5,ANG,ANK3,APBA2,APBB2,APLN,ARF4,ARHGEF2,ARID2,ARID3A,ARID4B,ARID5B,ASCC1,ASPH,ATAD2,ATF1,ATF2,ATF3,ATF5,ATF7,ATF7IP,ATM,ATOH8,ATP2B4,ATP2C1,ATRAID,ATXN1,ATXN1L,ATXN3,ATXN7L3,ATXN7L3B,AURKA,AURKB,BACH1,BACH2,BAG1,BAHD1,BAK1,BAP1,BARX2,BASP1,BCL10,BCL2,BCL2L12,BDKRB2,BDNF,BDP1,BEND3,BEX1,BHLHE22,BH…	850
Organismal Injury and Abnormalities,Reproductive System Disease	Abnormality of endometrium	5.78e-19	AAK1,AASDHPPT,ABCA5,ABCA8,ABCB4,ABCC8,ABCE1,ABCG5,ABHD14A-ACY1,ABI2,ABL1,ACAD8,ACSM1,ACSM3,ACVR1,ACY1,ADAM7,ADAM9,ADAMTS18,ADCY6,ADD3,ADGRB3,ADGRE1,ADI1,AGBL4,AGO1,AGPAT4,AGPS,AHCYL1,AJAP1,AKAP11,AKR1C1/AKR1C2,ALDH8A1,ALG10B,ALG11,ALK,ALKBH3,ALOX5,ANGPT2,ANK3,ANKRD27,ANKRD36,ANKRD44,ANKRD50,ANKRD52,ANP32B,ANP32E,AOC2,AP1S2,AP3B2,AP4E1,APBA2,APOBEC3A,AQP9,ARAP2,ARCN1,ARHGAP19,ARHGAP29,ARHGAP6,ARHG…	1022
Organismal Injury and Abnormalities,Reproductive System Disease	Abnormal growth in endometrium	5.99e-19	AAK1,AASDHPPT,ABCA5,ABCA8,ABCB4,ABCC8,ABCE1,ABCG5,ABHD14A-ACY1,ABI2,ABL1,ACAD8,ACSM1,ACSM3,ACVR1,ACY1,ADAM7,ADAM9,ADAMTS18,ADCY6,ADD3,ADGRB3,ADGRE1,ADI1,AGBL4,AGO1,AGPAT4,AGPS,AHCYL1,AJAP1,AKAP11,AKR1C1/AKR1C2,ALDH8A1,ALG10B,ALG11,ALK,ALKBH3,ALOX5,ANGPT2,ANK3,ANKRD27,ANKRD36,ANKRD44,ANKRD50,ANKRD52,ANP32B,ANP32E,AOC2,AP1S2,AP3B2,AP4E1,APBA2,APOBEC3A,AQP9,ARAP2,ARCN1,ARHGAP19,ARHGAP29,ARHGAP6,ARHG…	1020
Cancer,Organismal Injury and Abnormalities,Reproductive System Disease	Endometrium tumor	8.25e-19	AAK1,AASDHPPT,ABCA5,ABCA8,ABCB4,ABCC8,ABCE1,ABCG5,ABHD14A-ACY1,ABI2,ABL1,ACAD8,ACSM1,ACSM3,ACVR1,ACY1,ADAM7,ADAM9,ADAMTS18,ADCY6,ADD3,ADGRB3,ADGRE1,ADI1,AGBL4,AGO1,AGPAT4,AGPS,AHCYL1,AJAP1,AKAP11,AKR1C1/AKR1C2,ALDH8A1,ALG10B,ALG11,ALK,ALKBH3,ALOX5,ANGPT2,ANK3,ANKRD27,ANKRD36,ANKRD44,ANKRD50,ANKRD52,ANP32B,ANP32E,AOC2,AP1S2,AP3B2,AP4E1,APBA2,APOBEC3A,AQP9,ARAP2,ARCN1,ARHGAP19,ARHGAP29,ARHGAP6,ARHG…	1013
Cancer,Organismal Injury and Abnormalities,Reproductive System Disease	Endometrial cancer	1.14e-18	AAK1,AASDHPPT,ABCA5,ABCA8,ABCB4,ABCC8,ABCE1,ABCG5,ABHD14A-ACY1,ABI2,ABL1,ACAD8,ACSM1,ACSM3,ACVR1,ACY1,ADAM7,ADAM9,ADAMTS18,ADCY6,ADD3,ADGRB3,ADGRE1,ADI1,AGBL4,AGO1,AGPAT4,AGPS,AHCYL1,AJAP1,AKAP11,AKR1C1/AKR1C2,ALDH8A1,ALG10B,ALG11,ALK,ALKBH3,ALOX5,ANGPT2,ANK3,ANKRD27,ANKRD36,ANKRD44,ANKRD50,ANKRD52,ANP32B,ANP32E,AOC2,AP1S2,AP3B2,AP4E1,APBA2,APOBEC3A,AQP9,ARAP2,ARCN1,ARHGAP19,ARHGAP29,ARHGAP6,ARHG…	1010
Cancer,Organismal Injury and Abnormalities,Reproductive System Disease	Endometrioid endometrial adenocarcinoma	1.46e-18	AAK1,AASDHPPT,ABCA5,ABCA8,ABCB4,ABCC8,ABCE1,ABHD14A-ACY1,ABI2,ABL1,ACAD8,ACSM1,ACSM3,ACVR1,ACY1,ADAM7,ADAM9,ADCY6,ADD3,ADGRB3,ADGRE1,AGBL4,AGO1,AGPAT4,AGPS,AHCYL1,AJAP1,AKAP11,AKR1C1/AKR1C2,ALDH8A1,ALG10B,ALG11,ALKBH3,ALOX5,ANGPT2,ANK3,ANKRD27,ANKRD36,ANKRD44,ANKRD50,ANKRD52,ANP32B,ANP32E,AOC2,AP1S2,AP3B2,AP4E1,APBA2,APOBEC3A,AQP9,ARAP2,ARCN1,ARHGAP19,ARHGAP29,ARHGAP6,ARHGEF10,ARHGEF12,ARID2,ARID…	798
Nervous System Development and Function,Organ Morphology,Organismal Development	Morphology of brain	1.78e-18	AATK,ABCD2,ABI2,ABL1,ABL2,ADAMTS4,ADGRA2,AHI1,AIFM1,AKAP12,AKTIP,ALK,ALS2,ANK3,AP3M2,AP4E1,APBB2,ARL6,ATAT1,ATF2,ATM,ATXN1,ATXN1L,B2M,B4GALNT1,BACE1,BAG6,BAK1,BCL2L11,BCR,BDNF,BHLHE22,BID,BMPR1A,BMPR1B,BTG1,CACNA2D2,CACNG8,CALB1,CAMK4,CASP9,CAV1,CBLN3,CCND2,CCP110,CDK5R1,CDK5R2,CDKN1B,CDKN2C,CELSR2,CHL1,CHMP2B,CHRNA6,CLCN3,CLN5,CNR2,CNTN1,CNTN6,CPEB4,CRMP1,CTNNA2,CTNNB1,CTSB,CTSV,DAB1,DCX,DDHD2,D…	258
Cancer,Organismal Injury and Abnormalities,Reproductive System Disease	Uterine tumor	1.91e-18	AAK1,AASDHPPT,ABAT,ABCA5,ABCA8,ABCB4,ABCC8,ABCE1,ABCG5,ABHD14A-ACY1,ABI2,ABL1,ACAD8,ACSM1,ACSM3,ACVR1,ACY1,ADAM10,ADAM7,ADAM9,ADAMTS18,ADCY6,ADD3,ADGRB3,ADGRE1,ADGRE5,ADI1,ADRA2B,ADRA2C,ADRB1,AGBL4,AGO1,AGPAT4,AGPS,AHCYL1,AHR,AJAP1,AKAP11,AKR1C1/AKR1C2,ALDH8A1,ALG10B,ALG11,ALK,ALKBH3,ALOX5,ANGPT2,ANK3,ANKRD27,ANKRD36,ANKRD44,ANKRD50,ANKRD52,ANP32B,ANP32E,AOAH,AOC2,AP1S2,AP2S1,AP3B2,AP4E1,APBA2,AP…	1127
Cancer,Organismal Injury and Abnormalities,Reproductive System Disease	Endometrial adenocarcinoma	2.52e-18	AAK1,AASDHPPT,ABCA5,ABCA8,ABCB4,ABCC8,ABCE1,ABHD14A-ACY1,ABI2,ABL1,ACAD8,ACSM1,ACSM3,ACVR1,ACY1,ADAM7,ADAM9,ADCY6,ADD3,ADGRB3,ADGRE1,AGBL4,AGO1,AGPAT4,AGPS,AHCYL1,AJAP1,AKAP11,AKR1C1/AKR1C2,ALDH8A1,ALG10B,ALG11,ALK,ALKBH3,ALOX5,ANGPT2,ANK3,ANKRD27,ANKRD36,ANKRD44,ANKRD50,ANKRD52,ANP32B,ANP32E,AOC2,AP1S2,AP3B2,AP4E1,APBA2,APOBEC3A,AQP9,ARAP2,ARCN1,ARHGAP19,ARHGAP29,ARHGAP6,ARHGEF10,ARHGEF12,ARID2,…	834
Cancer,Organismal Injury and Abnormalities,Reproductive System Disease	Uterine endometrioid carcinoma	2.72e-18	AAK1,AASDHPPT,ABCA5,ABCA8,ABCB4,ABCC8,ABCE1,ABHD14A-ACY1,ABI2,ABL1,ACAD8,ACSM1,ACSM3,ACVR1,ACY1,ADAM7,ADAM9,ADCY6,ADD3,ADGRB3,ADGRE1,AGBL4,AGO1,AGPAT4,AGPS,AHCYL1,AJAP1,AKAP11,AKR1C1/AKR1C2,ALDH8A1,ALG10B,ALG11,ALKBH3,ALOX5,ANGPT2,ANK3,ANKRD27,ANKRD36,ANKRD44,ANKRD50,ANKRD52,ANP32B,ANP32E,AOC2,AP1S2,AP3B2,AP4E1,APBA2,APOBEC3A,AQP9,ARAP2,ARCN1,ARHGAP19,ARHGAP29,ARHGAP6,ARHGEF10,ARHGEF12,ARID2,ARID…	809
Cellular Development,Cellular Growth and Proliferation	Cell proliferation of tumor cell lines	2.91e-18	AAGAB,AASDHPPT,ABCB10,ABL1,ABL2,ACER3,ACKR3,ACP3,ACVR1,ACVR1C,ADAM10,ADAM17,ADAM9,ADAMTS4,ADIPOR2,AHR,AJUBA,AKAP12,ALCAM,ALK,ALKBH3,AMACR,ANG,ANGPT2,ANKHD1/ANKHD1-EIF4EBP3,AQP5,AQP8,ARCN1,ARHGEF2,ARID4B,ARIH1,ARL13B,ARL2BP,ARL5A,ARRDC3,ART4,ASPH,ATAD2,ATF2,ATF3,ATF5,ATG10,ATM,ATP5MD,ATR,AURKA,AURKB,BACE2,BAG1,BAK1,BAP1,BARX2,BBC3,BCL2,BCL2L11,BDKRB2,BDNF,BICRA,BID,BIRC2,BMP2,BMP5,BMP6,BMPR1A,BMPR…	730
Cellular Development,Cellular Growth and Proliferation,Nervous System Development and Function,Tissue Development	Development of neurons	4.05e-18	ABI2,ABL1,ABL2,ADAM10,ADAMTS3,ADAMTS4,ADGRB3,ADGRE5,ADGRL2,AFG3L2,AHR,AKAP5,AKTIP,ALK,ALS2,AMIGO2,ANK3,ANKRD27,ARHGAP32,ATCAY,ATF3,ATL1,ATXN1,AVIL,B4GALT6,BACE1,BASP1,BCL2,BDNF,BLOC1S6,BMP2,BSN,BTBD3,CACNA2D2,CACNB4,CALD1,CAMK4,CAMKK2,CAMSAP2,CAPNS1,CAPRIN1,CAV1,CBLN2,CCDC88A,CCK,CCN2,CD47,CDK5R1,CDK5R2,CDK6,CELSR2,CFL1,CHL1,CHMP2B,CHRM5,CLU,CNR1,CNTN1,CNTN4,COL25A1,CPEB4,CREB1,CRK,CRKL,CRMP1,CTN…	358
Organismal Survival	Perinatal death	5.11e-18	ABCA1,ABL1,ACKR3,ACVR2B,ADAM17,ADAM9,ADGRA2,ADRA2B,AFF4,APBA2,ARID4B,ARID5B,ATF2,ATG12,ATG16L1,ATG9A,ATM,ATXN1L,B3GNT5,BAG6,BAK1,BCL10,BCR,BDNF,BLNK,CACNB1,CAPRIN1,CASP2,CASP9,CBX2,CCDC47,CCN2,CCND3,CCP110,CDK2,CDK5R1,CDK5R2,CDK6,CEBPA,CEBPD,CELF2,CERS3,CIAPIN1,CITED2,CLEC1B,CLPTM1L,CNN3,CNTFR,COL25A1,CPLX3,CREB3L2,CRK,CTNNA2,DACT1,DCHS1,DERL2,DIO3,DKK1,DLX5,DSCAM,E2F3,EDNRA,EGFR,EHHADH,EIF4E2,EL…	261
Cell Death and Survival	Cell death of tumor cell lines	8.97e-18	A4GALT,AATK,ABCB4,ABCE1,ABL1,ABL2,ACER2,ACER3,ACKR3,ACO2,ACSM5,ACVR1C,ACVR2B,ADAM10,ADAM17,ADGRL2,ADI1,ADRB1,AHR,AIFM1,AKAP12,ALCAM,ALK,ALKBH3,ALOX5,ALS2,ANG,ANGPT2,AP2A2,ARHGEF3,AS3MT,ASB11,ATAD2,ATF1,ATF2,ATF3,ATF5,ATG10,ATG12,ATM,ATP1B3,ATR,ATXN1,ATXN3,AURKA,AURKB,AVPI1,B2M,B3GALT5,BACH1,BACH2,BAG1,BAG6,BAK1,BAP1,BBC3,BCAS2,BCL10,BCL2,BCL2A1,BCL2L10,BCL2L11,BCL2L12,BCL2L13,BCL2L14,BDNF,BETA TU…	665
Cardiovascular System Development and Function	Development of vasculature	9.73e-18	A4GNT,ABCB4,ABCC8,ABL1,ABL2,ABRA,ACE2,ACKR3,ACVR1,ACVR2B,ADAM17,ADAM9,ADAMTS3,ADAMTS8,ADCY6,ADGRA2,ADIPOR2,ADRA2B,ADRA2C,ADRB1,AGO1,AHR,ALCAM,ALOX5,AMIGO2,ANG,ANGPT2,ANGPTL1,ANGPTL6,AP1S2,AP2B1,AP3M2,AP3S2,AP4E1,APLN,APLNR,ARHGEF12,ARID4B,ATF2,ATF3,ATM,ATOH8,ATP1B3,ATP2B4,ATP5F1B,ATP5IF1,ATXN1,BACE1,BACH1,BAG4,BCL2,BDKRB2,BDNF,BMP2,BMP6,BMPR1A,BTG1,CALCB,CAPNS1,CAV1,CAV2,CAVIN2,CBL,CBLL1,CBX2,CCL…	465
Cancer,Organismal Injury and Abnormalities,Reproductive System Disease	Formation of uterine carcinoma	1.23e-17	AAK1,AASDHPPT,ABCA5,ABCA8,ABCB4,ABCC8,ABCE1,ABCG5,ABHD14A-ACY1,ABI2,ABL1,ACAD8,ACSM1,ACSM3,ACVR1,ACY1,ADAM7,ADAM9,ADAMTS18,ADCY6,ADD3,ADGRB3,ADGRE1,ADI1,AGBL4,AGO1,AGPAT4,AGPS,AHCYL1,AJAP1,AKAP11,AKR1C1/AKR1C2,ALDH8A1,ALG10B,ALG11,ALK,ALKBH3,ALOX5,ANGPT2,ANK3,ANKRD27,ANKRD36,ANKRD44,ANKRD50,ANKRD52,ANP32B,ANP32E,AOC2,AP1S2,AP3B2,AP4E1,APBA2,APOBEC3A,AQP9,ARAP2,ARCN1,ARHGAP19,ARHGAP29,ARHGAP6,ARHG…	944
Cancer,Organismal Injury and Abnormalities,Reproductive System Disease	Endometrial carcinoma	1.64e-17	AAK1,AASDHPPT,ABCA5,ABCA8,ABCB4,ABCC8,ABCE1,ABCG5,ABHD14A-ACY1,ABI2,ABL1,ACAD8,ACSM1,ACSM3,ACVR1,ACY1,ADAM7,ADAM9,ADAMTS18,ADCY6,ADD3,ADGRB3,ADGRE1,ADI1,AGBL4,AGO1,AGPAT4,AGPS,AHCYL1,AJAP1,AKAP11,AKR1C1/AKR1C2,ALDH8A1,ALG10B,ALG11,ALK,ALKBH3,ALOX5,ANGPT2,ANK3,ANKRD27,ANKRD36,ANKRD44,ANKRD50,ANKRD52,ANP32B,ANP32E,AOC2,AP1S2,AP3B2,AP4E1,APBA2,APOBEC3A,AQP9,ARAP2,ARCN1,ARHGAP19,ARHGAP29,ARHGAP6,ARHG…	943
Developmental Disorder	Dysgenesis	2.66e-17	ABCA5,ABL1,ACVR2B,ADAM17,AHI1,AHR,AKR1C1/AKR1C2,ALK,APBB2,ARID3A,ARID4B,ARID5B,ATF2,ATF7,ATM,BACH2,BAG1,BAG4,BAG6,BAK1,BCL2,BCL2L11,BHLHE22,BLNK,BMPR1A,BTRC,CACNA2D2,CASP9,CBL,CBX2,CCN2,CCNC,CCND2,CCND3,CCNE2,CD3G,CD47,CDH11,CDK2,CDK6,CDKN1B,CHMP1A,CITED2,CLP1,CNOT7,COL4A2,COX7B,CRHR2,CTNNB1,CTSD,CYP1B1,CYP51A1,DACT1,DDX11,DICER1,DLX3,DLX5,DSTYK,E2F3,E2F4,EDNRA,EGFR,EMG1,EPHA4,ERBB3,ERN1,ESR2,ETS…	268
Embryonic Development,Organismal Development	Development of head	2.76e-17	AATK,ABI2,ABL1,ABL2,ACVR1,ACVR2B,ADAM10,ADAM17,ADAM9,ADAMTS18,ADCYAP1R1,ADGRA2,AHI1,AIPL1,AKTIP,ALG2,ALK,AMTN,AP1S2,APBB2,AQP5,ARHGEF12,ARID5B,ARL13B,ARL6,ASPH,ASPN,ATAT1,ATM,ATP6AP2,ATXN1,ATXN1L,BAG6,BBS10,BCL2,BCL2L11,BCR,BDNF,BFSP1,BHLHE22,BID,BLOC1S5,BMP2,BMP5,BMP6,BMPR1A,BMPR1B,BNC2,BTBD3,C8orf37,CASP2,CASP9,CC2D2A,CCDC85C,CCND2,CD46,CDK2,CDK20,CDK5R1,CDK5R2,CDK5RAP3,CDK6,CDKN1B,CEBPA,CEBPD,…	443
Embryonic Development,Organismal Development	Development of body axis	3.56e-17	AATK,ABI2,ABL1,ABL2,ACVR1,ACVR2B,ADAM10,ADAM17,ADAM9,ADAMTS18,ADCYAP1R1,ADGRA2,AHI1,AIPL1,AKTIP,ALG2,ALK,AMTN,AP1S2,APBB2,AQP5,ARC,ARHGEF12,ARID5B,ARL13B,ARL6,ASPH,ASPN,ATAT1,ATM,ATP6AP2,ATXN1,ATXN1L,AURKA,BAG6,BBS10,BCL2,BCL2L11,BCR,BDNF,BFSP1,BHLHE22,BID,BLOC1S5,BMP2,BMP5,BMP6,BMPR1A,BMPR1B,BNC2,BTBD3,C8orf37,CASP2,CASP9,CC2D2A,CCDC85C,CCND2,CCP110,CD46,CDK2,CDK20,CDK5R1,CDK5R2,CDK5RAP3,CDK6,CD…	467
Cell Death and Survival	Neuronal cell death	4.9e-17	AARS1,AATK,ABL1,ADAM17,ADCYAP1R1,AGAP3,AIFM1,ALK,ALS2,AMIGO2,AP2B1,ATF2,ATF3,ATG12,ATM,ATP2C1,ATXN1,B4GALNT1,BACE1,BAG1,BAG5,BAG6,BAK1,BBC3,BCL2,BCL2L11,BDNF,BID,BMP2,BMPR1B,BNIP3,BTG1,CACNA2D2,CACNG8,CALB1,CAPNS1,CAPRIN1,CASP2,CASP9,CCN2,CCNB1,CD200,CDC25B,CDK2,CDK5R1,CERS2,CHL1,CIAPIN1,CLU,CNR1,CNTFR,COL25A1,COQ9,CPEB4,CREB1,CSF3,CTNNB1,CTSB,CTSD,CTSV,CX3CL1,CXCL9,CYCS,DAPK1,DDIT3,DFFA,DICER1,D…	283
Cardiovascular System Development and Function,Organismal Development	Angiogenesis	5.77e-17	A4GNT,ABCC8,ABRA,ACE2,ACVR1,ACVR2B,ADAM17,ADAM9,ADAMTS3,ADAMTS8,ADCY6,ADGRA2,ADIPOR2,ADRA2B,ADRA2C,AGO1,AHR,ALCAM,ALOX5,AMIGO2,ANG,ANGPT2,ANGPTL1,ANGPTL6,AP1S2,AP2B1,AP3M2,AP3S2,AP4E1,APLN,APLNR,ARID4B,ATF2,ATF3,ATM,ATOH8,ATP1B3,ATP2B4,ATP5F1B,ATP5IF1,ATXN1,BACE1,BAG4,BCL2,BDKRB2,BDNF,BMP2,BMP6,BMPR1A,BTG1,CALCB,CAPNS1,CAV1,CAV2,CAVIN2,CBL,CBLL1,CBX2,CCL28,CCN2,CCN3,CCN6,CCNE2,CD151,CD160,CD28,CD…	416
Cell Morphology,Cellular Development,Cellular Growth and Proliferation,Nervous System Development and Function,Organismal Development,Tissue Development	Morphogenesis of neurons	6.48e-17	ABI2,ABL1,ABL2,ADAM10,ADAMTS3,ADAMTS4,ADGRB3,AFG3L2,AHR,AKAP5,ALS2,ANK3,ANKRD27,ARHGAP32,ATCAY,ATF3,ATL1,ATXN1,AVIL,B4GALT6,BACE1,BASP1,BCL2,BDNF,BLOC1S6,BMP2,BSN,BTBD3,CALD1,CAMK4,CAMKK2,CAMSAP2,CAPNS1,CAPRIN1,CAV1,CCDC88A,CCK,CCN2,CD47,CDK5R1,CDK5R2,CELSR2,CFL1,CHL1,CHMP2B,CLU,CNR1,CNTN1,CNTN4,COL25A1,CPEB4,CREB1,CRK,CRKL,CRMP1,CTNNA2,CTNND1,CTNND2,CTTN,DAB1,DAB2IP,DACT1,DCX,DICER1,DIXDC1,DLX5,…	285
Organismal Development,Organismal Injury and Abnormalities	Abnormal morphology of head	7.1e-17	ABCD2,ABI2,ABL1,ABL2,ADAM17,ADAM9,ADAMTS4,ADGRA2,ADRA2B,ADRA2C,AHI1,AHR,AIPL1,AKAP12,ALK,ALS2,ANK3,AP3M2,APBB2,ARL6,ASPH,ATM,ATXN1,ATXN1L,B2M,B4GALNT1,BAG6,BAK1,BBS10,BCL2,BCL2L11,BCR,BDNF,BFSP1,BHLHE22,BID,BMP2,BMPR1A,BMPR1B,BTG1,CACNA2D2,CACNG8,CALB1,CAMK4,CASP9,CAV1,CBLN3,CCN2,CCN3,CCND2,CCP110,CD46,CDH11,CDK2,CDK20,CDK5R1,CDK5R2,CDKN1B,CDKN2C,CDO1,CELSR2,CHD7,CHL1,CHRNA6,CHST6,CLCN3,CLN5,CNR2…	398
Cell Morphology,Cellular Assembly and Organization,Cellular Development,Cellular Function and Maintenance,Cellular Growth and Proliferation,Nervous System Development and Function,Organismal Development,Tissue Development	Neuritogenesis	7.98e-17	ABI2,ABL1,ABL2,ADAM10,ADAMTS3,ADAMTS4,ADGRB3,AFG3L2,AHR,AKAP5,ALS2,ANK3,ANKRD27,ARHGAP32,ATCAY,ATF3,ATL1,ATXN1,AVIL,B4GALT6,BACE1,BASP1,BCL2,BDNF,BLOC1S6,BMP2,BSN,BTBD3,CALD1,CAMK4,CAMKK2,CAMSAP2,CAPNS1,CAPRIN1,CAV1,CCDC88A,CCK,CCN2,CD47,CDK5R1,CDK5R2,CELSR2,CFL1,CHL1,CHMP2B,CLU,CNR1,CNTN1,CNTN4,COL25A1,CPEB4,CREB1,CRK,CRKL,CRMP1,CTNNA2,CTNND1,CTNND2,CTTN,DAB1,DAB2IP,DACT1,DCX,DICER1,DIXDC1,DLX5,…	282
Cellular Movement	Migration of cells	8.06e-17	ABCB4,ABCG1,ABHD2,ABL1,ABL2,ACE2,ACKR3,ACP5,ACVR1,ADAM10,ADAM17,ADAM9,ADCYAP1R1,ADGRA2,ADGRE5,ADGRF5,ADI1,AHR,AJUBA,AKAP11,AKAP12,AKIRIN1,ALCAM,ALOX5,ANGPT2,ANGPTL1,APBB2,APLN,APPL1,AQP5,AQP8,ARF4,ARHGAP18,ARHGAP21,ARHGEF12,ARID2,ARID5B,ARPIN/ARPIN-AP3S2,ARRDC3,ASIC1,ASPH,ATAT1,ATF2,ATF3,ATG12,ATG16L1,ATG9A,ATM,ATOH8,ATOX1,ATP1B3,ATP2B4,ATP5F1B,ATP8A1,ATXN7L3,AURKA,B4GALT6,B4GAT1,BACH2,BAG1,BAG4,…	807
Cancer,Organismal Injury and Abnormalities,Reproductive System Disease	Uterine cancer	1.12e-16	AAK1,AASDHPPT,ABAT,ABCA5,ABCA8,ABCB4,ABCC8,ABCE1,ABCG5,ABHD14A-ACY1,ABI2,ABL1,ACAD8,ACSM1,ACSM3,ACVR1,ACY1,ADAM10,ADAM7,ADAM9,ADAMTS18,ADCY6,ADD3,ADGRB3,ADGRE1,ADI1,AGBL4,AGO1,AGPAT4,AGPS,AHCYL1,AJAP1,AKAP11,AKR1C1/AKR1C2,ALDH8A1,ALG10B,ALG11,ALK,ALKBH3,ALOX5,ANGPT2,ANK3,ANKRD27,ANKRD36,ANKRD44,ANKRD50,ANKRD52,ANP32B,ANP32E,AOAH,AOC2,AP1S2,AP3B2,AP4E1,APBA2,APOBEC3A,APOBEC3B,AQP9,ARAP2,ARCN1,ARHG…	1070
Developmental Disorder	Hypoplasia	1.44e-16	ABCA5,ABL1,ACVR2B,ADAM17,AHI1,AHR,ALK,APBB2,ARID3A,ARID4B,ARID5B,ATF2,ATF7,ATM,BACH2,BAG1,BAG4,BAG6,BCL2,BHLHE22,BLNK,BMPR1A,BTRC,CACNA2D2,CASP9,CBL,CCN2,CCNC,CCND2,CCND3,CCNE2,CD3G,CDH11,CDK2,CDK6,CDKN1B,CHMP1A,CLP1,CNOT7,COL4A2,CRHR2,CTSD,CYP51A1,DACT1,DDX11,DICER1,DLX3,DLX5,DSTYK,E2F3,E2F4,EDNRA,EGFR,EMG1,ERBB3,ERN1,ESR2,ETS1,EYA1,FGF10,FGF20,FGF7,FGF9,FKBP1A,FOXC2,FOXF1,FOXF2,FOXP3,FRMD4A,FSH…	242
Developmental Disorder	Aplasia or hypoplasia	1.83e-16	ABCA5,ABL1,ACVR2B,ADAM17,AHI1,AHR,ALK,APBB2,ARID3A,ARID4B,ARID5B,ATF2,ATF7,ATM,BACH2,BAG1,BAG4,BAG6,BAK1,BCL2,BCL2L11,BHLHE22,BLNK,BMPR1A,BTRC,CACNA2D2,CASP9,CBL,CCN2,CCNC,CCND2,CCND3,CCNE2,CD3G,CD47,CDH11,CDK2,CDK6,CDKN1B,CHMP1A,CITED2,CLP1,CNOT7,COL4A2,COX7B,CRHR2,CTNNB1,CTSD,CYP51A1,DACT1,DDX11,DICER1,DLX3,DLX5,DSTYK,E2F3,E2F4,EDNRA,EGFR,EMG1,EPHA4,ERBB3,ERN1,ESR2,ETS1,EYA1,FGF10,FGF20,FGF7,FG…	256
Nervous System Development and Function	Morphology of central nervous system	2.09e-16	AATK,ABCD2,ABI2,ABL1,ABL2,ADAMTS4,ADGRA2,AHI1,AIFM1,AKAP12,AKTIP,ALK,ALS2,ANK3,AP3M2,AP4E1,APBB2,ARL6,ATAT1,ATF2,ATM,ATXN1,ATXN1L,B2M,B4GALNT1,BACE1,BAG6,BAK1,BCL2L11,BCR,BDNF,BHLHE22,BID,BMPR1A,BMPR1B,BTG1,CACNA2D2,CACNG8,CALB1,CAMK4,CASP9,CAV1,CBLN3,CCND2,CCP110,CD80,CDK5R1,CDK5R2,CDKN1B,CDKN2C,CELSR2,CHL1,CHMP2B,CHRNA6,CLCN3,CLN5,CNR2,CNTN1,CNTN6,CPEB4,CRMP1,CTNNA2,CTNNB1,CTSB,CTSV,DAB1,DCX,DD…	271
Cancer,Gastrointestinal Disease,Organismal Injury and Abnormalities	Colorectal tumor	2.36e-16	AATK,ABCA2,ABCA5,ABCA8,ABCC8,ABCE1,ABCG5,ABHD14B,ABHD2,ABI2,ABL1,ABL2,ACAD11,ACAP2,ACE2,ACKR3,ACOT7,ACP3,ACTA1,ACTR5,ACVR1,ADAM10,ADAM17,ADAM9,ADAMTS18,ADAMTS4,ADAMTS8,ADD3,ADGRA2,ADGRB3,ADGRE1,ADGRE5,ADGRF5,ADGRL2,ADIPOR2,ADK,ADRA2C,AFF4,AFG3L2,AGAP3,AGAP5 (includes others),AGL,AGPAT5,AHI1,AHRR,AJAP1,AJUBA,AK3,AKAP12,AKR1C1/AKR1C2,AKTIP,ALCAM,ALDH8A1,ALG10B,ALK,ALKBH3,ALOX5,ALS2,AMACR,AMMECR1,AM…	1701
Cellular Movement	Cell movement	3.02e-16	ABCA1,ABCB4,ABCG1,ABHD2,ABL1,ABL2,ACE2,ACKR3,ACO2,ACP5,ACTR2,ACVR1,ADAM10,ADAM17,ADAM9,ADCYAP1R1,ADGRA2,ADGRE5,ADGRF5,ADI1,AHR,AJAP1,AJUBA,AKAP11,AKAP12,AKIRIN1,ALCAM,ALOX5,ANGPT2,ANGPTL1,APBB2,APLN,APLNR,APPL1,AQP5,AQP8,ARF4,ARHGAP18,ARHGAP19,ARHGAP21,ARHGEF12,ARID2,ARID5B,ARPIN/ARPIN-AP3S2,ARRDC3,ASIC1,ASPH,ATAT1,ATF2,ATF3,ATG12,ATG16L1,ATG9A,ATM,ATOH8,ATOX1,ATP1B3,ATP2B4,ATP5F1B,ATP8A1,ATXN7L3…	891
Cellular Function and Maintenance	Cellular homeostasis	3.53e-16	A4GALT,ABCC8,ABCG1,ABL1,ABL2,ACER2,ACO1,ADAM10,ADAM17,ADCY6,ADCY7,ADGRF5,ADIPOR2,ADRB1,AHR,AIFM3,ALOX5,AMPD3,ANGPT2,AP2A2,APOL6,AQP10,AQP11,AQP2,AQP5,ARFGEF3,ASIC1,ASPH,ATF2,ATG10,ATG12,ATG16L1,ATG2B,ATG4B,ATG9A,ATM,ATOX1,ATP1B3,ATP2B4,ATP2C1,ATP5IF1,ATP6V0A2,ATP6V1G1,ATXN3,AURKA,B2M,B3GNT2,BACE2,BAG6,BAK1,BAP1,BBC3,BCAT2,BCL10,BCL2,BCL2A1,BCL2L11,BCR,BDKRB2,BDNF,BHLHE40,BID,BIRC2,BMP2,BMP6,BNIP3…	634
Cancer,Organismal Injury and Abnormalities	Lymphohematopoietic neoplasia	5e-16	ABAT,ABCB4,ABCG1,ABCG5,ABL1,ABL2,ABRAXAS2,ACAD11,ACP5,ACSM3,ACSM6,ADAM10,ADAM17,ADAM7,ADAM9,ADAMTS3,ADCY7,ADCYAP1R1,ADD3,ADGRA2,ADGRB3,ADGRF5,ADGRL2,ADK,ADRA2C,ADRB1,AGAP5 (includes others),AGBL4,AGL,AHI1,AHR,AIFM1,AKAP11,AKAP5,ALG10B,ALK,ALOX5,AMACR,AMMECR1,ANAPC1,ANGPT2,ANK3,ANKFY1,ANKHD1/ANKHD1-EIF4EBP3,ANKIB1,ANKRD36,ANKRD50,ANKS1B,APLNR,APOBEC3A,APOBEC3B,AQP7,ARHGAP17,ARHGAP6,ARHGEF3,ARID2,A…	1044
Cancer,Hematological Disease,Organismal Injury and Abnormalities	Hematopoietic neoplasm	5.24e-16	ABAT,ABCB4,ABCG1,ABCG5,ABL1,ABL2,ABRAXAS2,ACAD11,ACP5,ACSM3,ACSM6,ADAM10,ADAM17,ADAM7,ADAM9,ADAMTS3,ADCY7,ADCYAP1R1,ADD3,ADGRA2,ADGRB3,ADGRF5,ADGRL2,ADK,ADRA2C,ADRB1,AGAP5 (includes others),AGBL4,AGL,AHI1,AHR,AIFM1,AKAP11,AKAP5,ALG10B,ALK,ALOX5,AMACR,AMMECR1,ANAPC1,ANGPT2,ANK3,ANKFY1,ANKHD1/ANKHD1-EIF4EBP3,ANKIB1,ANKRD36,ANKRD50,ANKS1B,APLNR,APOBEC3A,APOBEC3B,AQP7,ARHGAP17,ARHGAP6,ARHGEF3,ARID2,A…	1038
Cancer,Gastrointestinal Disease,Organismal Injury and Abnormalities	Colorectal cancer	7.73e-16	AATK,ABCA2,ABCA5,ABCA8,ABCC8,ABCE1,ABCG5,ABHD14B,ABHD2,ABI2,ABL1,ABL2,ACAD11,ACAP2,ACE2,ACKR3,ACOT7,ACP3,ACTA1,ACTR5,ACVR1,ADAM10,ADAM17,ADAM9,ADAMTS18,ADAMTS4,ADAMTS8,ADD3,ADGRA2,ADGRB3,ADGRE1,ADGRE5,ADGRF5,ADGRL2,ADIPOR2,ADK,ADRA2C,AFF4,AFG3L2,AGAP3,AGAP5 (includes others),AGL,AGPAT5,AHI1,AHRR,AJAP1,AJUBA,AK3,AKAP12,AKR1C1/AKR1C2,AKTIP,ALCAM,ALDH8A1,ALG10B,ALK,ALKBH3,ALOX5,ALS2,AMACR,AMMECR1,AM…	1669
Developmental Disorder	Hypoplasia of organ	1e-15	ABCA5,ABL1,ACVR2B,ADAM17,AHI1,AHR,ALK,APBB2,ARID3A,ARID4B,ARID5B,ATF2,ATF7,ATM,BACH2,BAG1,BAG4,BAG6,BCL2,BHLHE22,BLNK,BTRC,CACNA2D2,CASP9,CBL,CCN2,CCNC,CCND2,CCND3,CCNE2,CD3G,CDK2,CDK6,CDKN1B,CHMP1A,CLP1,CNOT7,COL4A2,CRHR2,CTSD,CYP51A1,DACT1,DDX11,DICER1,DLX5,DSTYK,E2F3,E2F4,EDNRA,EGFR,ERBB3,ERN1,ESR2,ETS1,EYA1,FGF10,FGF20,FGF7,FGF9,FKBP1A,FOXC2,FOXF1,FOXF2,FOXP3,FRMD4A,FSHB,FUBP1,GATA4,GATA6,GDN…	217
Cellular Development,Cellular Growth and Proliferation,Nervous System Development and Function,Tissue Development	Proliferation of neuronal cells	1.2e-15	AATK,ACAP2,ADAM10,ADAM17,ADCYAP1R1,AKTIP,ALK,ALS2,APBA2,APBB2,APLN,ARHGAP17,ARHGAP32,B2M,B4GALNT1,BAG1,BASP1,BCL2,BDNF,CABLES1,CAMK1,CAMK4,CAMKK2,CAV1,CCK,CDC42BPA,CDK2,CDK5R1,CDK5R2,CELF2,CNR1,COTL1,CREB1,CRMP1,CTNNA1,CTNNB1,CX3CL1,CXCL9,DAB2IP,DAGLA,DCX,DIXDC1,DLX5,DOCK1,DTNBP1,DUSP10,DUSP13,EEA1,EFNB2,EGFR,EGR3,EIF5A,ELAVL4,ELMO2,EPHA2,EPN1,ESR2,EXOC4,EXOC5,EXT1,EXTL3,EZR,FAIM,FAM107A,FGF4,FGF…	219
Nervous System Development and Function	Development of central nervous system	1.35e-15	AATK,ABL1,ABL2,ACVR1,ADAM10,ADCYAP1R1,ADGRA2,AHI1,AKTIP,ALK,APBB2,ARL6,ATAT1,ATM,ATXN1,ATXN1L,B3GNT5,BAG6,BCL2,BCR,BDNF,BHLHE22,BMP2,BMP5,BMPR1A,BTBD3,CASP2,CASP9,CC2D2A,CCDC85C,CCND2,CDK5R1,CDK5R2,CDK5RAP3,CDK6,CDKN1B,CELSR2,CEP120,CHD7,CHL1,CITED2,CLN5,CLP1,CNR1,CNTN1,CNTN6,COX7B,CREB1,CRK,CRKL,CTNNA2,CTNNB1,CXADR,CYCS,DAB1,DBI,DCX,DICER1,DIO3,DIXDC1,DKK1,DLC1,DLX5,DNAJC30,DRGX,DUSP10,E2F4,EBF3…	296
Cancer,Organismal Injury and Abnormalities	Breast or pancreatic cancer	1.54e-15	AAK1,AATK,ABAT,ABCA1,ABCA2,ABCA8,ABCB4,ABCC8,ABHD10,ABHD2,ABI2,ABL1,ABL2,ABRA,ACAD11,ACE2,ACKR3,ACO1,ACOXL,ACP3,ACP5,ACSF2,ACSM3,ACSM5,ACSM6,ACTR2,ADAM10,ADAM17,ADAM9,ADAMTS18,ADAMTS3,ADAMTS4,ADAMTS8,ADCK1,ADCY6,ADCYAP1R1,ADGRB3,ADGRE1,ADGRF5,ADGRL2,ADIPOR2,ADK,ADRA2B,ADRA2C,ADRB1,AGAP3,AGBL4,AGL,AGO1,AGPAT5,AHR,AHRR,AIFM1,AIPL1,AJAP1,AJUBA,AK3,AKAP11,AKAP12,AKR1C1/AKR1C2,AKTIP,ALCAM,ALK,ALKBH3,A…	1583
Cancer,Organismal Injury and Abnormalities	Lymphohematopoietic cancer	2.12e-15	ABAT,ABCB4,ABCG1,ABCG5,ABL1,ABL2,ABRAXAS2,ACAD11,ACP5,ACSM3,ACSM6,ADAM10,ADAM7,ADAM9,ADAMTS3,ADCY7,ADCYAP1R1,ADD3,ADGRA2,ADGRB3,ADGRF5,ADGRL2,ADK,ADRA2C,ADRB1,AGAP5 (includes others),AGBL4,AGL,AHI1,AHR,AIFM1,AKAP11,AKAP5,ALG10B,ALK,ALOX5,AMACR,AMMECR1,ANAPC1,ANGPT2,ANK3,ANKFY1,ANKHD1/ANKHD1-EIF4EBP3,ANKIB1,ANKRD36,ANKRD50,ANKS1B,APLNR,APOBEC3A,APOBEC3B,AQP7,ARHGAP17,ARHGAP6,ARHGEF3,ARID2,ARID3A,A…	1025
Cancer,Hematological Disease,Organismal Injury and Abnormalities	Hematologic cancer	2.69e-15	ABAT,ABCB4,ABCG1,ABCG5,ABL1,ABL2,ABRAXAS2,ACAD11,ACP5,ACSM3,ACSM6,ADAM10,ADAM7,ADAM9,ADAMTS3,ADCY7,ADCYAP1R1,ADD3,ADGRA2,ADGRB3,ADGRF5,ADGRL2,ADK,ADRA2C,ADRB1,AGAP5 (includes others),AGBL4,AGL,AHI1,AHR,AIFM1,AKAP11,AKAP5,ALG10B,ALK,ALOX5,AMACR,AMMECR1,ANAPC1,ANGPT2,ANK3,ANKFY1,ANKHD1/ANKHD1-EIF4EBP3,ANKIB1,ANKRD36,ANKRD50,ANKS1B,APLNR,APOBEC3A,APOBEC3B,AQP7,ARHGAP17,ARHGAP6,ARHGEF3,ARID2,ARID3A,A…	1018
Molecular Transport	Transport of molecule	2.73e-15	ABAT,ABCA1,ABCA5,ABCB10,ABCB4,ABCC8,ABCG1,ABCG5,ABRA,ACO1,ACTR1A,ADAM9,ADIPOR2,ADRA2B,ADRA2C,AFG3L2,AGAP3,AGFG1,AHCYL1,AHI1,AKAP5,AKR1C1/AKR1C2,AKTIP,ALK,ALOX5,ANG,ANGPT2,ANK3,AP1S2,AP2A2,AP3B2,AP3S1,AP3S2,AP4E1,AP4M1,APOC3,APPL1,AQP10,AQP11,AQP2,AQP5,AQP7,AQP8,AQP9,ARCN1,ARF5,ARFGAP3,ARHGEF12,ARL4D,ASIC1,ASPH,ATOX1,ATP1B3,ATP2B4,ATP2C1,ATP5F1B,ATP5MG,ATP6V0A2,ATP6V0B,ATP6V0D2,ATP6V1D,ATP6V1E2,AT…	636
Nervous System Development and Function,Tissue Morphology	Morphology of nervous tissue	3.24e-15	AATK,ABCD2,ABI2,ABL1,ABL2,ADAM10,ADAMTS4,ADCYAP1R1,AIPL1,AKAP5,ALS2,AP3M2,ARC,ATAT1,ATM,ATXN1,ATXN3,B2M,B4GALNT1,BACE1,BCAS1,BCL2,BCL2L11,BDNF,BID,BMP2,BMPR1A,BMPR1B,CACNA1C,CACNA2D2,CACNG8,CALB1,CAMK4,CAMKK2,CAPRIN1,CASP2,CASP9,CAV1,CCDC88A,CCND2,CD2AP,CD47,CDK5R1,CDK5R2,CDNF,CFL1,CHL1,CHMP2B,CLCN3,CLN5,CLP1,CNR1,CNR2,CNTFR,CNTN1,CNTN6,COL13A1,COL25A1,COQ9,CPEB4,CRMP1,CTNNA2,CTNND2,CTSB,CTSD,CTS…	278
Cancer,Hematological Disease,Organismal Injury and Abnormalities	Myeloid or lymphoid neoplasm	3.27e-15	ABAT,ABCB4,ABCG1,ABCG5,ABL1,ABL2,ABRAXAS2,ACAD11,ACP5,ACSM3,ACSM6,ADAM17,ADAM7,ADAM9,ADAMTS3,ADCY7,ADCYAP1R1,ADD3,ADGRA2,ADGRB3,ADGRF5,ADGRL2,ADRA2C,ADRB1,AGAP5 (includes others),AGBL4,AGL,AHI1,AHR,AIFM1,AKAP11,AKAP5,ALG10B,ALK,ALOX5,AMACR,AMMECR1,ANAPC1,ANGPT2,ANK3,ANKFY1,ANKHD1/ANKHD1-EIF4EBP3,ANKIB1,ANKRD36,ANKRD50,ANKS1B,APLNR,APOBEC3A,APOBEC3B,AQP7,ARHGAP17,ARHGAP6,ARHGEF3,ARID2,ARID3A,ARID4…	1022
Connective Tissue Development and Function,Tissue Development	Growth of connective tissue	3.34e-15	ABCD2,ABL1,AHR,AKAP12,ALKAL2,APLN,APLNR,ARHGAP32,ARHGEF12,ARID3A,ATF1,ATF2,ATF3,ATM,ATR,ATRAID,AURKA,AURKB,BCL2,BCR,BMP2,BMP6,BMPR1A,BMPR1B,BTRC,CAPNS1,CAV1,CBL,CBX2,CCDC80,CCN2,CCN4,CCNB1,CCND2,CCND3,CCNG1,CCNG2,CD274,CD28,CD300A,CDK2,CDK3,CDK6,CDKN1B,CDKN2C,CITED2,CNOT7,CNR2,COL9A1,CREB1,CREB3L2,CRK,CRKL,CSF3,CSK,CTNNB1,CTSB,CTSV,DAB2IP,DDX5,DHFR,DHX9,DICER1,DMP1,DSG2,DSG4,DUSP1,E2F7,EDNRA,EFNB…	270
Cell Death and Survival	Apoptosis of tumor cell lines	3.68e-15	A4GALT,AATK,ABCE1,ABL1,ABL2,ACER3,ACO2,ACSM5,ACVR1C,ACVR2B,ADAM17,ADGRL2,ADI1,AHR,AIFM1,AKAP12,ALCAM,ALK,ALKBH3,ALOX5,ALS2,ANGPT2,AP2A2,ARHGEF3,ASB11,ATAD2,ATF1,ATF2,ATF3,ATF5,ATG10,ATM,ATP1B3,ATR,AURKA,B2M,B3GALT5,BACH1,BACH2,BAG1,BAG6,BAK1,BAP1,BBC3,BCAS2,BCL10,BCL2,BCL2A1,BCL2L10,BCL2L11,BCL2L12,BCL2L13,BCL2L14,BDNF,BETA TUBULIN,BHLHE40,BID,BIRC2,BLNK,BMP2,BMP6,BMPR1B,BNIP3,BPIFA1,BTRC,BUB3,CA…	533
Gene Expression	Activation of DNA endogenous promoter	3.72e-15	ABCA2,ABHD14B,ABL1,ABRA,ACTR2,ACVR1,ACVR2B,AEBP2,AGO1,AHI1,AHR,AHRR,AJUBA,ARF4,ARHGEF2,ARID2,ARID3A,ARID4B,ARID5B,ATF1,ATF2,ATF3,ATF5,ATF7,ATF7IP,ATM,ATP2B4,ATXN1,ATXN1L,AURKB,BACH1,BACH2,BAG1,BARX2,BCL2L12,BEND3,BEX1,BHLHE40,BHLHE41,BMP2,BMP3,BMP5,BMP6,BMPR1A,BMPR1B,BNC1,BRD3,CAMK1,CAV1,CAVIN2,CAVIN4,CBFA2T3,CBX2,CBX6,CCDC62,CCND3,CCNH,CCNT1,CCNT2,CD28,CDC5L,CDK2,CDK5RAP3,CDK6,CDX4,CEBPA,CEBPD,C…	503
Cell Death and Survival	Cell survival	3.79e-15	ABCA1,ABCB4,ABL1,ABL2,ACER2,ACKR3,ACVR2B,ADAM17,ADCYAP1R1,ADK,AEN,AGPS,AHR,AIFM1,AK3,AKAP5,ALCAM,ALK,ALKBH3,ALS2,ANAPC1,ANGPT2,ANGPTL1,ANKS1B,ANLN,AP2B1,APOBEC3A,APPL1,ASF1A,ATF1,ATF2,ATF3,ATF5,ATG12,ATG4B,ATM,ATP2C1,ATP5MD,ATR,ATXN1,AURKA,AURKB,B2M,BAG1,BAK1,BBC3,BCL10,BCL2,BCL2A1,BCL2L11,BCR,BDNF,BHLHE40,BID,BIRC2,BLK,BLNK,BMP2,BMP5,BMP6,BMPR1A,BNIP3,BTLA,BTRC,C4A/C4B,CALB1,CAMK2N1,CAMK4,CAMKK2…	572
Embryonic Development,Nervous System Development and Function,Organ Development,Organismal Development,Tissue Development	Formation of brain	4.17e-15	AATK,ABL1,ABL2,ACVR1,ADAM10,ADCYAP1R1,ADGRA2,AHI1,AKTIP,ALK,APBB2,ARL6,ATAT1,ATM,ATXN1,ATXN1L,BAG6,BCL2,BCR,BDNF,BHLHE22,BMP2,BMP5,BMPR1A,BTBD3,CASP2,CASP9,CC2D2A,CCDC85C,CCND2,CDK5R1,CDK5R2,CDK5RAP3,CDK6,CELSR2,CEP120,CHD7,CHL1,CLN5,CLP1,CNR1,CNTN1,CREB1,CRK,CRKL,CTNNA2,CTNNB1,CXADR,DAB1,DBI,DCX,DICER1,DIO3,DIXDC1,DKK1,DLC1,DLX5,DNAJC30,E2F4,EBF3,EFNA1,EFNA5,EGFR,EGLN1,ENAH,EOMES,EPHA4,EPHA7,ESR…	238
Cellular Growth and Proliferation,Connective Tissue Development and Function,Tissue Development	Proliferation of connective tissue cells	5.01e-15	ABL1,AHR,AKAP12,ALKAL2,APLN,APLNR,ARHGAP32,ARHGEF12,ARID3A,ATF1,ATF2,ATF3,ATM,ATR,ATRAID,BCL2,BMP2,BMP6,BMPR1A,BMPR1B,BTRC,CAPNS1,CAV1,CBL,CBX2,CCDC80,CCN2,CCN4,CCNB1,CCND2,CCND3,CCNG1,CCNG2,CD300A,CDK2,CDK3,CDK6,CDKN1B,CDKN2C,CITED2,CNOT7,COL9A1,CREB1,CREB3L2,CRK,CRKL,CSF3,CSK,CTNNB1,CTSB,CTSV,DAB2IP,DDX5,DHX9,DICER1,DMP1,DSG2,DSG4,DUSP1,E2F7,EDNRA,EFNB2,EGFR,EPHA2,ERBIN,ERN1,ERRFI1,ESPL1,ESR2,F…	248
Cancer,Hematological Disease,Organismal Injury and Abnormalities	Neoplasia of blood cells	5.55e-15	ABAT,ABCB4,ABCG1,ABCG5,ABL1,ABL2,ABRAXAS2,ACAD11,ACP5,ACSM3,ACSM6,ADAM17,ADAM7,ADAM9,ADAMTS3,ADCY7,ADCYAP1R1,ADD3,ADGRA2,ADGRB3,ADGRF5,ADGRL2,ADRA2C,ADRB1,AGAP5 (includes others),AGBL4,AGL,AHI1,AHR,AIFM1,AKAP11,AKAP5,ALG10B,ALK,ALOX5,AMACR,AMMECR1,ANAPC1,ANGPT2,ANK3,ANKFY1,ANKHD1/ANKHD1-EIF4EBP3,ANKIB1,ANKRD36,ANKRD50,ANKS1B,APLNR,APOBEC3A,APOBEC3B,AQP7,ARHGAP17,ARHGAP6,ARHGEF3,ARID2,ARID3A,ARID4…	1021
Cell Morphology,Nervous System Development and Function,Tissue Morphology	Morphology of neurons	5.77e-15	AATK,ABCD2,ABI2,ABL1,ABL2,ADAM10,ADAMTS4,ADCYAP1R1,AIPL1,AKAP5,ALS2,AP3M2,ARC,ATAT1,ATM,ATXN1,ATXN3,B2M,B4GALNT1,BACE1,BCAS1,BCL2,BCL2L11,BDNF,BID,BMP2,BMPR1A,BMPR1B,CACNA1C,CACNA2D2,CACNG8,CALB1,CAMK4,CAMKK2,CAPRIN1,CASP2,CASP9,CAV1,CCDC88A,CCND2,CD2AP,CD47,CDK5R1,CDK5R2,CDNF,CFL1,CHL1,CHMP2B,CLCN3,CLN5,CLP1,CNR1,CNR2,CNTFR,CNTN1,CNTN6,COL13A1,COL25A1,COQ9,CPEB4,CRMP1,CTNNA2,CTNND2,CTSB,CTSD,CTS…	272
Cell Death and Survival	Cell viability	9.24e-15	ABCA1,ABCB4,ABL1,ABL2,ACER2,ACKR3,ACVR2B,ADAM17,ADCYAP1R1,ADK,AEN,AGPS,AHR,AIFM1,AK3,AKAP5,ALCAM,ALK,ALKBH3,ALS2,ANAPC1,ANGPT2,ANGPTL1,ANKS1B,ANLN,AP2B1,APOBEC3A,APPL1,ASF1A,ATF1,ATF2,ATF3,ATF5,ATG12,ATG4B,ATM,ATP2C1,ATP5MD,ATR,ATXN1,AURKA,AURKB,B2M,BAG1,BAK1,BBC3,BCL10,BCL2,BCL2A1,BCL2L11,BCR,BDNF,BHLHE40,BID,BIRC2,BLK,BLNK,BMP2,BMP5,BMP6,BMPR1A,BNIP3,BTLA,BTRC,CALB1,CAMK2N1,CAMK4,CAMKK2,CASP2,C…	552
Cancer,Gastrointestinal Disease,Organismal Injury and Abnormalities	Non-colon gastrointestinal cancer	1.28e-14	A4GNT,ABCA1,ABCA2,ABCA5,ABCA8,ABCB4,ABCC8,ABL1,ACAD11,ACO1,ACSF2,ACVR1,ADAM10,ADAM7,ADAM9,ADAMTS18,ADCK1,ADD3,ADGRB3,ADGRE5,ADGRL2,ADIPOR2,ADRA2B,ADRA2C,ADRB1,AGBL4,AGO1,AHRR,AIFM1,AJAP1,AKAP11,AKNAD1,AKR1C1/AKR1C2,ALCAM,ALK,ALS2,AMMECR1,AMMECR1L,ANAPC1,ANGPT2,ANK3,ANKRD50,ANKS1B,ANKZF1,ANLN,AP2A2,AP2B1,AP3M2,APBA2,APCDD1L,AQP2,ARC,ARFGEF3,ARHGAP18,ARHGAP32,ARHGEF18,ARID2,ARID3A,ARID4B,ARID5B,ARM…	1102
Cellular Movement	Invasion of cells	1.72e-14	ABL1,ABL2,ACKR3,ACVR1,ACVR1C,ADAM10,ADAM17,ADAM9,ADGRE5,ADI1,AHR,AJAP1,AKAP12,ALCAM,ALKBH3,ANGPT2,ANK3,ANXA8/ANXA8L1,AQP8,ARF4,ARRDC3,ASPH,ATF1,ATF3,AURKA,B4GAT1,BARX2,BBC3,BCL10,BCL2,BDNF,BHLHE41,BMP2,BMP6,CA3,CAPNS1,CAV1,CAVIN2,CBL,CCDC88A,CCN2,CCN3,CCN4,CCN6,CCNA1,CCNH,CCR9,CD151,CD274,CDC25B,CDC42BPA,CDH11,CDK14,CDK2,CDK5R1,CDK5RAP3,CDKN1B,CDKN3,CEBPA,CEBPD,CELF2,CLU,CNDP2,CNR1,COX4I1,CREB3L2…	407
Neurological Disease	Motor dysfunction or movement disorder	1.81e-14	ABCA1,ABCA2,ABCA5,ABCD2,ABL1,ADCY7,ADD3,ADRA2B,ADRA2C,ADRB1,AFG3L2,AGL,AHCYL1,AHR,ALS2,ANK3,AP1S2,APBA2,APLNR,ARF4,ARF5,ARHGAP32,ARPP19,ATCAY,ATL1,ATM,ATP5MG,ATP6AP2,ATXN1,ATXN3,B2M,B3GNT2,B4GALNT1,B4GAT1,BACE1,BASP1,BCAS1,BCL2,BCR,BDNF,BHLHE22,BHLHE40,BID,BIRC2,C4A/C4B,CA1,CA3,CACNA1C,CACNA2D1,CACNA2D2,CACNB1,CACNB4,CADM4,CALB1,CAMK4,CAMKK2,CANX,CASP2,CASP9,CAV1,CBLN3,CCDC88C,CCN2,CD160,CDH11,CD…	467
Cancer,Organismal Injury and Abnormalities,Reproductive System Disease	Uterine carcinoma	2.74e-14	AAK1,AASDHPPT,ABCA5,ABCA8,ABCB4,ABCC8,ABCE1,ABCG5,ABHD14A-ACY1,ABI2,ABL1,ACAD8,ACSM1,ACSM3,ACVR1,ACY1,ADAM7,ADAM9,ADAMTS18,ADCY6,ADD3,ADGRB3,ADGRE1,ADI1,AGBL4,AGO1,AGPAT4,AGPS,AHCYL1,AJAP1,AKAP11,AKR1C1/AKR1C2,ALDH8A1,ALG10B,ALG11,ALK,ALKBH3,ALOX5,ANGPT2,ANK3,ANKRD27,ANKRD36,ANKRD44,ANKRD50,ANKRD52,ANP32B,ANP32E,AOAH,AOC2,AP1S2,AP3B2,AP4E1,APBA2,APOBEC3A,AQP9,ARAP2,ARCN1,ARHGAP19,ARHGAP29,ARHGAP6…	978
Cellular Development,Cellular Growth and Proliferation,Nervous System Development and Function,Tissue Development	Growth of neurites	6.35e-14	AATK,ACAP2,ADAM10,ADAM17,ALK,ALS2,APBA2,APBB2,ARHGAP17,ARHGAP32,B4GALNT1,BAG1,BASP1,BCL2,BDNF,CABLES1,CAMK1,CAMK4,CAV1,CCK,CDC42BPA,CDK2,CDK5R1,CDK5R2,CELF2,CNR1,COTL1,CREB1,CRMP1,CXCL9,DAB2IP,DCX,DIXDC1,DLX5,DOCK1,DTNBP1,DUSP10,DUSP13,EEA1,EFNB2,EGFR,EGR3,EIF5A,ELAVL4,ELMO2,EPHA2,EPN1,ESR2,EXOC4,EXOC5,EXT1,EXTL3,EZR,FAIM,FAM107A,FGF4,FGF7,FN1,GAB1,GAL,GAP43,GDAP1,GDNF,GEMIN2,GNAQ,GPHN,GPM6A,GPR1…	183
Cancer,Organismal Injury and Abnormalities	Cancer of cells	7.21e-14	ABAT,ABCA1,ABCA2,ABCB4,ABCG1,ABL1,ABL2,ABRAXAS2,ACAD11,ACO2,ACOXL,ACP5,ACSM5,ACSM6,ADAM17,ADAM7,ADAM9,ADAMTS18,ADD3,ADGRA2,ADGRB3,ADGRE5,ADGRF5,ADGRL2,ADI1,ADRB1,AGAP5 (includes others),AGBL4,AGL,AHI1,AHR,AIFM1,AJUBA,AKAP11,AKAP12,AKAP5,AKNAD1,ALAD,ALCAM,ALK,ALOX5,ALS2,AMACR,AMMECR1,AMMECR1L,ANGPT2,ANGPTL1,ANK3,ANKIB1,ANKRD36,ANKRD50,ANKRD52,ANKS1B,ANKZF1,ANLN,AOAH,AP2B1,APBA2,APOBEC3A,APOBEC3B,A…	1517
Tissue Morphology	Quantity of cells	7.27e-14	ABCA1,ABCG1,ABL1,ABL2,ACKR3,ACVR1C,ADAM10,ADAM17,ADAM9,ADAMTS4,ADD3,ADGRE5,ADGRF5,ADRB1,AHR,AIFM1,AIPL1,AKAP5,ALCAM,ALK,ALOX5,ALS2,ANG,ANGPT2,ANK3,ANKHD1/ANKHD1-EIF4EBP3,ARC,ARID3A,ARID4B,ARID5B,ARL4A,ATAT1,ATF2,ATF3,ATM,ATP2C1,ATP6AP2,ATP6V0A2,ATXN1,ATXN3,AURKA,B2M,B3GNT5,B4GALNT1,BACE1,BACH2,BAK1,BAP1,BBC3,BBS10,BCL10,BCL2,BCL2A1,BCL2L10,BCL2L11,BCR,BDNF,BHLHE40,BID,BIRC2,BLK,BLNK,BMP2,BMP6,BMP…	730
Neurological Disease,Organismal Injury and Abnormalities	Seizure disorder	8.41e-14	AARS1,ABAT,ABCC8,ABCD2,ADAM10,ADRA2B,ADRB1,AKAP5,ANK3,AP3B2,AP3M2,ARC,ARHGAP32,ARID5B,ARRDC3,ATF3,ATOX1,ATP2C1,ATP6AP2,B4GALNT1,BACE1,BAK1,BBC3,BCL2L11,BDNF,BHLHE40,BID,BSN,C4A/C4B,CA1,CA3,CACNA1C,CACNA1E,CACNA2D1,CACNA2D2,CACNB4,CDK5R1,CDK5R2,CEBPD,CHD2,CHST6,CITED2,CLCN3,CLU,CNPY3,CNR1,CRH,CTSB,CTSD,CXCL2,CYP2C19,CYP2C9,CYYR1,DCX,DEPDC5,DHFR,DNAJB5,DTNA,DUSP1,EGR3,ELAVL4,ELL2,EPHX1,EPM2A,ERRFI1…	236
Cell Cycle	Cell cycle progression	9.92e-14	ABL1,ABRAXAS2,ACKR3,ACSM5,ADGRL2,AHR,AJUBA,ALK,ANGEL2,ANLN,APBB2,ARHGAP32,ARPP19,ATAT1,ATF3,ATM,ATR,AURKA,AURKB,BAK1,BAP1,BCL2,BCL2L11,BCR,BEX1,BEX4,BIRC2,BLNK,BMP2,BMP6,BMPR1A,BMPR1B,BRINP2,BTG4,BTRC,BUB3,CABLES1,CACUL1,CALCB,CALD1,CAMK2N1,CAMK4,CASP2,CAV1,CAV2,CBL,CCL3,CCNB1,CCNC,CCND2,CCND3,CCNE2,CCNG1,CCNG2,CCNH,CCNI,CCNT1,CCNT2,CCP110,CCT4,CD160,CD28,CD70,CDC14A,CDC25B,CDC37,CDC5L,CDCA8,CDK1…	416
Cancer,Gastrointestinal Disease,Organismal Injury and Abnormalities	Upper gastrointestinal carcinoma	1.24e-13	A4GNT,ABCA1,ABCA2,ABCA8,ABCB4,ABCC8,ABL1,ACAD11,ACO1,ACSF2,ACVR1,ADAM7,ADAM9,ADAMTS18,ADCK1,ADD3,ADGRB3,ADGRE5,ADGRL2,ADIPOR2,AGBL4,AGO1,AHRR,AIFM1,AJAP1,AKAP11,AKNAD1,ALCAM,ALK,ALS2,AMMECR1,AMMECR1L,ANAPC1,ANGPT2,ANK3,ANKRD50,ANKS1B,ANKZF1,ANLN,AP2A2,AP2B1,AP3M2,APBA2,APCDD1L,AQP2,ARC,ARFGEF3,ARHGAP18,ARHGAP32,ARHGEF18,ARID2,ARID3A,ARID4B,ARID5B,AS3MT,ASB5,ASCC1,ASIC1,ASPH,ASPN,ATF5,ATG4B,ATM,AT…	963
Cancer,Gastrointestinal Disease,Organismal Injury and Abnormalities	Upper gastrointestinal tract cancer	1.27e-13	A4GNT,ABCA1,ABCA2,ABCA8,ABCB4,ABCC8,ABL1,ACAD11,ACO1,ACSF2,ACVR1,ADAM10,ADAM7,ADAM9,ADAMTS18,ADCK1,ADD3,ADGRB3,ADGRE5,ADGRL2,ADIPOR2,ADRA2B,ADRA2C,ADRB1,AGBL4,AGO1,AHRR,AIFM1,AJAP1,AKAP11,AKNAD1,ALCAM,ALK,ALS2,AMMECR1,AMMECR1L,ANAPC1,ANGPT2,ANK3,ANKRD50,ANKS1B,ANKZF1,ANLN,AP2A2,AP2B1,AP3M2,APBA2,APCDD1L,AQP2,ARC,ARFGEF3,ARHGAP18,ARHGAP32,ARHGEF18,ARID2,ARID3A,ARID4B,ARID5B,AS3MT,ASB5,ASCC1,ASIC1,…	1009
Cellular Movement	Cell movement of neurons	1.57e-13	ADAM10,ADAM17,ADCYAP1R1,APBB2,ATAT1,AURKA,BDNF,CCK,CDK5R1,CDK5R2,CDKN1B,CDKN2C,CELSR2,CHL1,CNR1,CNR2,CRK,CRKL,CTNNA2,CTNNB1,CUL5,CX3CL1,DAB1,DCX,E2F3,EBF1,EBF3,EDNRB,EFNA5,EFNB2,EOMES,EPHA4,ERBB3,ESR2,FOXG1,FSCN1,FYN,FZD3,GDNF,GLI3,GNA13,GPM6A,GRB2,HBEGF,HGF,HOXA1,HSP90AA1,IGF1R,ITGB1,KATNA1,KIF20B,KIF2A,KLF4,L1CAM,LAMC1,LMX1B,LRP12,MAP2K4,MAPK8,MAPK9,MARK1,MARVELD1,MEF2C,MET,MNX1,MRTFB,MT3,MYH10…	117
Cancer,Gastrointestinal Disease,Organismal Injury and Abnormalities	Upper gastrointestinal tract tumor	1.64e-13	A4GNT,ABCA1,ABCA2,ABCA8,ABCB4,ABCC8,ABL1,ACAD11,ACO1,ACSF2,ACVR1,ADAM10,ADAM7,ADAM9,ADAMTS18,ADCK1,ADD3,ADGRB3,ADGRE5,ADGRL2,ADIPOR2,ADRA2B,ADRA2C,ADRB1,AGBL4,AGO1,AHR,AHRR,AIFM1,AJAP1,AKAP11,AKNAD1,ALCAM,ALK,ALS2,AMMECR1,AMMECR1L,ANAPC1,ANGPT2,ANK3,ANKRD50,ANKS1B,ANKZF1,ANLN,AP2A2,AP2B1,AP3M2,APBA2,APCDD1L,AQP2,ARC,ARFGEF3,ARHGAP18,ARHGAP32,ARHGEF18,ARID2,ARID3A,ARID4B,ARID5B,AS3MT,ASB5,ASCC1,AS…	1014
Nervous System Development and Function,Neurological Disease,Organ Morphology,Organismal Development,Organismal Injury and Abnormalities	Abnormal morphology of brain	1.77e-13	ABCD2,ABI2,ABL1,ABL2,ADAMTS4,ADGRA2,AHI1,AKAP12,ALK,ALS2,ANK3,AP3M2,APBB2,ARL6,ATM,ATXN1,ATXN1L,B2M,B4GALNT1,BAG6,BAK1,BCL2L11,BCR,BDNF,BHLHE22,BID,BTG1,CACNA2D2,CACNG8,CALB1,CAMK4,CASP9,CAV1,CBLN3,CCND2,CCP110,CDK5R1,CDK5R2,CDKN1B,CDKN2C,CELSR2,CHL1,CHRNA6,CLCN3,CLN5,CNR2,CNTN1,CNTN6,CRMP1,CTNNA2,CTSB,CTSV,DAB1,DDHD2,DFFA,DKK1,DLX5,E2F5,EBF1,EFNA5,EGFR,EI24,EIF4EBP2,EPB41L2,EPHA4,EPHA7,EPM2A,ERB…	204
Cancer,Organismal Injury and Abnormalities,Reproductive System Disease	Breast or ovarian cancer	1.85e-13	ABAT,ABCA1,ABCA2,ABCA8,ABCC8,ABHD10,ABHD2,ABI2,ABL1,ABL2,ACAD11,ACE2,ACP3,ACP5,ACTR2,ADAM10,ADAM17,ADAM9,ADAMTS18,ADAMTS3,ADAMTS4,ADAMTS8,ADCK1,ADCY6,ADCYAP1R1,ADGRB3,ADGRF5,ADIPOR2,ADK,ADRA2C,ADRB1,AGAP3,AGBL4,AGL,AHRR,AIFM1,AIPL1,AJUBA,AK3,AKAP12,AKR1C1/AKR1C2,AKTIP,ALCAM,ALK,ALKBH3,ALOX5,ALS2,AMOTL2,ANAPC13,ANG,ANGPT2,ANKIB1,ANKRD27,ANKRD36,ANKRD50,ANKRD52,ANKRD55,ANLN,ANP32B,ANXA8/ANXA8L1,AP3…	1198
Developmental Disorder,Embryonic Development,Organismal Development,Tissue Morphology	Abnormal morphology of embryo	1.92e-13	ABL1,ABL2,ACKR3,ACVR1,ACVR2B,ADAM10,ADAM17,ANGPTL6,APBB2,ARC,ARHGEF12,ATP2C1,AURKA,BAG6,BCL2,BDNF,BMP2,BMPR1A,CACNA1C,CAPNS1,CCN2,CCND2,CCNE2,CCP110,CDK20,CDK5R1,CDK5R2,CFL1,CITED2,COPS5,CSK,CTNNB1,CTSV,CXADR,CYP51A1,DAB1,DAB2,DACT1,DCX,DDX11,DHX9,DKK1,DLC1,DLX5,E2F7,ECT2,EDNRA,EFNA5,EFNB2,EGFR,EGLN1,EOMES,EPHA3,EPN1,ERBB3,ERN1,ESPL1,EYA1,FGF10,FGF4,FGF9,FLRT3,FN1,FOXA2,FOXC2,FOXF1,FOXF2,FRS2,GAT…	246
Developmental Disorder,Embryonic Development,Organismal Development,Tissue Morphology	Abnormal morphology of embryonic tissue	2.01e-13	ABL1,ABL2,ACKR3,ACVR1,ACVR2B,ADAM10,ADAM17,ANGPTL6,APBB2,ARC,ARHGEF12,ATP2C1,AURKA,BAG6,BCL2,BDNF,BMP2,BMPR1A,CACNA1C,CAPNS1,CCN2,CCND2,CCNE2,CCP110,CDK20,CDK5R1,CDK5R2,CFL1,CITED2,COPS5,CSK,CTNNB1,CTSV,CXADR,CYP51A1,DAB1,DAB2,DACT1,DCX,DDX11,DHX9,DKK1,DLC1,DLX5,E2F7,ECT2,EDNRA,EFNA5,EFNB2,EGFR,EGLN1,EOMES,EPHA3,EPN1,ERBB3,ERN1,EYA1,FGF10,FGF4,FGF9,FLRT3,FN1,FOXA2,FOXC2,FOXF1,FOXF2,FRS2,GATA4,GAT…	244
Organismal Development	Morphology of body cavity	2.07e-13	A4GNT,ABCA1,ABCA5,ABCB10,ABCB4,ABCC8,ABCG1,ABL1,ABL2,ACE2,ACKR3,ACP3,ACVR1C,ACVR2B,ADAM10,ADAM17,ADAM9,ADAMTS18,ADAMTS3,ADGRE5,ADGRF5,ADIPOR2,ADK,ADRA2B,ADRA2C,ADRB1,AFF4,AGL,AHR,AIFM1,AKAP11,AKAP12,AKAP5,ALOX5,AMACR,ANGPT2,AOAH,APLN,APLNR,APRT,AQP11,AQP7,ARFGEF3,ARHGEF12,ARID3A,ARID4B,ARID5B,ATF2,ATF3,ATF7,ATM,ATP6AP2,ATXN1,ATXN1L,AURKA,B2M,B3GNT5,B4GALNT1,BAG6,BAK1,BBC3,BBS10,BCAT2,BCL2,BCL2L11…	648
Cellular Development,Nervous System Development and Function,Tissue Development	Differentiation of neurons	2.23e-13	ABL1,ABL2,ADRA2B,ADRA2C,AIFM1,ALK,ALKAL2,APLNR,ARHGAP32,ARHGEF2,ATF5,ATM,ATP2C1,BAG1,BCL2,BDNF,BHLHE22,BMP2,BMP6,BRINP2,BTG4,CAV1,CDK5R1,CDK5R2,CDK5RAP3,CDKN1B,CDKN2C,CHRDL1,CNR1,CNTN4,CTDSP1,CTNNB1,DAB1,DICER1,DIXDC1,DLX5,DNMT3B,DOCK4,DOK5,DRGX,EBF1,EBF3,ECT2,EFNA1,EIF4ENIF1,ELAVL2,ELAVL4,EOMES,EPHA2,EYA1,FEV,FGF20,FGF4,FGF7,FMR1,FN1,FOXA1,FOXA2,FOXG1,FOXO3,FST,FXR2,GAB2,GAP43,GDNF,GDPD5,GLI3,GP…	183
Neurological Disease	Movement Disorders	2.3e-13	ABCA1,ABCA2,ABCA5,ABCD2,ABL1,ADCY7,ADD3,ADRA2B,ADRA2C,ADRB1,AFG3L2,AGL,AHCYL1,AHR,ALS2,ANK3,AP1S2,APBA2,APLNR,ARF4,ARF5,ARHGAP32,ARPP19,ATCAY,ATL1,ATM,ATP5MG,ATP6AP2,ATXN1,ATXN3,B2M,B3GNT2,B4GALNT1,B4GAT1,BACE1,BASP1,BCAS1,BCL2,BCR,BDNF,BHLHE22,BHLHE40,BID,BIRC2,C4A/C4B,CA1,CA3,CACNA1C,CACNA2D1,CACNA2D2,CACNB4,CADM4,CALB1,CAMK4,CAMKK2,CANX,CASP2,CASP9,CAV1,CBLN3,CCDC88C,CCN2,CD160,CDH11,CDK5R1,CD…	455
Cellular Movement,Nervous System Development and Function	Migration of neurons	2.36e-13	ADAM10,ADAM17,ADCYAP1R1,APBB2,ATAT1,AURKA,BDNF,CCK,CDK5R1,CDK5R2,CDKN1B,CDKN2C,CELSR2,CHL1,CNR1,CNR2,CRK,CRKL,CTNNA2,CTNNB1,CUL5,CX3CL1,DAB1,DCX,E2F3,EBF1,EBF3,EDNRB,EFNA5,EFNB2,EOMES,EPHA4,ERBB3,ESR2,FOXG1,FSCN1,FYN,FZD3,GDNF,GLI3,GNA13,GPM6A,GRB2,HBEGF,HGF,HOXA1,HSP90AA1,IGF1R,ITGB1,KATNA1,KIF20B,KIF2A,KLF4,L1CAM,LAMC1,LMX1B,LRP12,MAP2K4,MAPK8,MAPK9,MARK1,MARVELD1,MEF2C,MET,MNX1,MRTFB,MYH10,MYL…	113
Cancer,Organismal Injury and Abnormalities,Reproductive System Disease	Breast or ovarian carcinoma	3.45e-13	ABAT,ABCA1,ABCA2,ABCA8,ABCC8,ABHD10,ABHD2,ABI2,ABL1,ABL2,ACAD11,ACE2,ACP3,ACP5,ACTR2,ADAM17,ADAMTS18,ADAMTS3,ADAMTS4,ADAMTS8,ADCK1,ADCY6,ADCYAP1R1,ADGRB3,ADGRF5,ADIPOR2,ADRA2C,AGAP3,AGBL4,AGL,AHRR,AIFM1,AIPL1,AJUBA,AK3,AKR1C1/AKR1C2,AKTIP,ALK,ALKBH3,ALOX5,ALS2,AMOTL2,ANGPT2,ANKIB1,ANKRD27,ANKRD36,ANKRD50,ANKRD52,ANKRD55,ANLN,ANP32B,ANXA8/ANXA8L1,AP3B2,ARF4,ARHGAP19,ARHGAP32,ARHGEF12,ARHGEF18,ARHG…	992
Cell Morphology,Cellular Development	Branching of cells	4.38e-13	ABL1,ABL2,ADAM10,ADAMTS3,ADAMTS4,ADCY6,AHR,AKAP5,ANG,ANGPT2,ANKRD27,ARHGAP32,ATF3,ATXN1,BACE1,BASP1,BCL2,BDKRB2,BDNF,BSN,CALD1,CAMK4,CAMKK2,CAPNS1,CAV1,CCDC88A,CDK2,CDK5R1,CDK5R2,CFL1,CHMP2B,CNR1,COL25A1,CPEB4,CREB1,CRMP1,CTBP2,CTNNA2,CTNND1,CTNND2,DAB2IP,DACT1,DCX,DICER1,DOCK1,DSCAM,DTNBP1,EFNA5,EFNB2,EGR3,EIF4EBP2,ELAVL4,ELMO1,EPS8,ERC2,ETS1,FAM107A,FER,FGF10,FGF4,FGF7,FMR1,FNBP1,FYN,GAB1,GAP43…	174
Organismal Development	Abnormal morphology of body cavity	4.55e-13	A4GNT,ABCA1,ABCA5,ABCB10,ABCB4,ABCC8,ABL1,ABL2,ACE2,ACKR3,ACP3,ACVR2B,ADAM10,ADAM17,ADAM9,ADAMTS18,ADAMTS3,ADGRF5,ADK,ADRA2B,ADRA2C,ADRB1,AFF4,AGL,AHR,AIFM1,AKAP11,AKAP12,AKAP5,ALOX5,AMACR,ANGPT2,AOAH,APLN,APLNR,APRT,AQP11,ARFGEF3,ARHGEF12,ARID3A,ARID4B,ARID5B,ATF2,ATF3,ATF7,ATM,ATXN1,ATXN1L,B2M,B3GNT5,BAG6,BAK1,BBC3,BBS10,BCAT2,BCL2,BCL2L11,BCR,BDKRB2,BDNF,BHLHE40,BID,BIRC2,BLNK,BMP2,BMPR1B,BNIP…	580
Embryonic Development,Organismal Development	Development of body trunk	5.15e-13	ABCA1,ABL1,ACE2,ACKR3,ACVR1,ACVR2B,ADAM10,ADAM17,ADAMTS18,ADGRF5,ADRA2B,AFF4,AHI1,AHR,AKAP12,AKAP5,AP2B1,AP3M2,AP3S2,AP4E1,APLN,APLNR,APRT,AQP11,ARID2,ARID4B,ARID5B,ARL13B,ATF2,ATF3,ATF7,ATM,ATXN1,ATXN1L,B2M,BAG4,BAG6,BAK1,BBC3,BCL2,BCL2L11,BDKRB2,BDNF,BID,BIRC2,BMP2,BMP5,BMP6,BMPR1A,BTRC,BVES,CACNA1C,CACNB4,CAMK4,CAPNS1,CASP9,CAV1,CAV2,CAV3,CBL,CBX2,CC2D2A,CCDC103,CCN2,CCN3,CCND2,CCND3,CCNE2,CCR…	486
Tissue Development	Growth of epithelial tissue	6.86e-13	A4GNT,ABCB4,ADAM17,ADAMTS8,ADRA2B,AHR,ALOX5,ANG,ANGPT2,ANGPTL1,ANGPTL6,APLN,AQP11,ATF2,ATF3,ATM,ATOH8,ATP1B3,ATP5IF1,B2M,BCL2,BCL2A1,BIRC2,BMP2,BMP5,BMP6,BMPR1A,BNC1,BTRC,CALCB,CAV1,CAV2,CAVIN2,CBL,CBLL1,CCND2,CCND3,CCNG2,CDC25B,CDC37,CDK2,CDK6,CDKN1B,CDKN2C,CEBPA,CERS2,CITED2,CLEC1B,CLEC4G,CLU,CNMD,COL4A2,CTNNA1,CTNNB1,CTSV,CUL5,CXCL1,DAAM1,DAB2,DAB2IP,DDX5,DGKA,DICER1,DKK1,DLC1,DLX5,DMP1,DSG4,D…	274
Cellular Movement	Invasion of tumor cell lines	6.94e-13	ABL1,ABL2,ACVR1,ACVR1C,ADAM10,ADAM17,ADAM9,ADGRE5,ADI1,AHR,AJAP1,AKAP12,ALCAM,ALKBH3,ANK3,ANXA8/ANXA8L1,AQP8,ARRDC3,ASPH,ATF1,ATF3,AURKA,B4GAT1,BARX2,BBC3,BCL10,BCL2,BDNF,BHLHE41,BMP2,BMP6,CA3,CAPNS1,CAV1,CBL,CCDC88A,CCN2,CCN3,CCN4,CCN6,CCNA1,CCNH,CD151,CD274,CDC25B,CDC42BPA,CDH11,CDK14,CDK2,CDK5R1,CDK5RAP3,CDKN1B,CDKN3,CEBPA,CEBPD,CLU,CNDP2,CNR1,CRK,CRMP1,CRTAP,CSF3,CSK,CST4,CTBP2,CTDSP1,CTNNB1,…	348
Cancer,Organismal Injury and Abnormalities	Multiple cancers	7.69e-13	ABAT,ABCA1,ABCA2,ABCA8,ABCC8,ABHD10,ABHD2,ABI2,ABL1,ABL2,ACAD11,ACE2,ACP3,ACP5,ACTR2,ADAM10,ADAM17,ADAM9,ADAMTS18,ADAMTS3,ADAMTS4,ADAMTS8,ADCK1,ADCY6,ADCYAP1R1,ADGRB3,ADGRF5,ADIPOR2,ADK,ADRA2C,ADRB1,AGAP3,AGBL4,AGL,AHRR,AIFM1,AIPL1,AJUBA,AK3,AKAP12,AKR1C1/AKR1C2,AKTIP,ALCAM,ALK,ALKBH3,ALOX5,ALS2,AMOTL2,ANAPC13,ANG,ANGPT2,ANKIB1,ANKRD27,ANKRD36,ANKRD50,ANKRD52,ANKRD55,ANLN,ANP32B,ANXA8/ANXA8L1,AP3…	1221
Organismal Development	Size of head	8.26e-13	AATK,ABL1,AHI1,AIFM1,AKTIP,AP4E1,ATF2,B4GALNT1,BAK1,BCL2,BDNF,BMPR1A,BMPR1B,CASP9,CAV1,CDK5R1,CDK5R2,CDKN1B,CDKN2C,CLCN3,CPEB4,CRKL,CTNNB1,CYP51A1,DICER1,DKK1,DLX5,DSCAM,E2F3,EBF1,EFNA5,EFNB2,EGFR,EIF4E2,EPB41L2,ESR2,EYA1,FGF10,FOXA2,FOXO1,FOXO3,FSCN1,FST,FYN,FZD3,GAP43,GDNF,GLI3,GPM6B,GPR85,IGF1R,IRS2,ITGB1,ITPR1,KHDRBS1,KHDRBS2,KIDINS220,KIF14,KIF5C,KLF4,L1CAM,LAMC1,LAMP2,LMX1B,MAF,MAGOH,MAPK7,…	110
Cell Cycle	Interphase	8.96e-13	AASDHPPT,ABL1,ACTR1A,ACVR1,ADCYAP1R1,AHR,AJUBA,AKAP12,AMACR,APOBEC3A,ARPP19,ATF2,ATF3,ATF5,ATM,ATR,AURKA,BAP1,BCL2,BHLHE40,BID,BMP2,BTG1,BTLA,BTRC,CABLES1,CACUL1,CALCR,CAMK1,CAMK2N1,CAMKK2,CAPNS1,CASP9,CAV1,CBL,CBX2,CCNA1,CCNB1,CCND2,CCND3,CCNE2,CCNG1,CCNG2,CCNH,CCNY,CCP110,CD28,CDC25B,CDC5L,CDCA2,CDK14,CDK2,CDK3,CDK5RAP3,CDK6,CDKN1B,CDKN2C,CDKN3,CEBPA,CEBPD,CELF2,CEP135,CEP250,CEP41,CEP43,CEP57,…	306
Organismal Development	Growth of organism	9.5e-13	AARS1,ABCA1,ABL2,ACVR1,ACVR2B,ADRA2B,AGO1,AHR,APBA2,APLN,APLNR,AQP2,AQP5,AQP9,ARC,ARCN1,ARID5B,ARPP19,ATF2,ATF5,ATF7,ATM,ATOX1,BBC3,BCL2,BCL2A1,BDNF,BMP2,BMP6,BMPR1A,BMPR1B,BPIFA1,CACNA2D2,CALB1,CASP2,CASP9,CBX2,CDK2,CDK6,CDKN1B,CDKN2C,CEBPD,CEP120,CFL1,CITED2,CLIC4,CLU,CNR1,CNR2,COL4A2,COPS5,CRCP,CREB1,CSF3,CTNNA1,CTNNB1,CTSB,CTSD,CX3CL1,CXCL2,DAGLA,DBI,DDX11,DICER1,DKK1,DLX3,DNAJB9,DNAJC3,E2F3,…	329
Post-Translational Modification	Phosphorylation of protein	1.33e-12	AAK1,AATK,ABL1,ABL2,ACVR1,ACVR1C,ACVR2B,ADAM10,ADAM17,AKAP11,AKAP5,AKTIP,ALK,ANG,APLN,ATM,ATR,ATXN1,AURKA,AURKB,AURKC,B3GNT5,BAG1,BCL10,BCR,BMP2,BMPR1A,BMPR1B,CADM4,CALCB,CAMK1,CAMK4,CAMKK2,CBL,CCDC88A,CCDC88C,CCN2,CCNB1,CCND2,CCND3,CCNT1,CCNYL1,CD28,CD47,CDC25B,CDC42BPA,CDC42BPG,CDK2,CDK5RAP3,CDK6,CDKN1B,CDKN2C,CFL1,CHP1,CLEC1B,COPS8,CORO1C,CREB1,CRH,CRKL,CRY1,CSK,CSNK1G1,CTDSP1,CTDSP2,CTDSPL,CX…	281
Nervous System Development and Function,Neurological Disease	Abnormal morphology of central nervous system	1.55e-12	ABCD2,ABI2,ABL1,ABL2,ADAMTS4,ADGRA2,AHI1,AKAP12,ALK,ALS2,ANK3,AP3M2,APBB2,ARL6,ATM,ATXN1,ATXN1L,B2M,B4GALNT1,BAG6,BAK1,BCL2L11,BCR,BDNF,BHLHE22,BID,BTG1,CACNA2D2,CACNG8,CALB1,CAMK4,CASP9,CAV1,CBLN3,CCND2,CCP110,CD80,CDK5R1,CDK5R2,CDKN1B,CDKN2C,CELSR2,CHL1,CHRNA6,CLCN3,CLN5,CNR2,CNTN1,CNTN6,CRMP1,CTNNA2,CTSB,CTSV,DAB1,DDHD2,DFFA,DKK1,DLX5,E2F5,EBF1,EFNA5,EGFR,EI24,EIF4EBP2,EPB41L2,EPHA4,EPHA7,EPM2…	217
Neurological Disease	Epilepsy or neurodevelopmental disorder	1.97e-12	AARS1,ABAT,ABCC8,ADRA2B,ADRA2C,ADRB1,AP3B2,AP3M2,ARC,ARHGEF2,ARID5B,ARRDC3,ATF3,ATP6AP2,BBC3,BCL2L11,BDNF,BSN,C4A/C4B,CA1,CA3,CACNA1C,CACNA1E,CACNA2D1,CACNA2D2,CACNB4,CCR9,CDKN1B,CEBPD,CHD2,CHD7,CITED2,CLU,CNPY3,CRH,CTNNA2,CTSB,CYP2C19,CYP2C9,DCX,DDC,DEPDC5,DHFR,DNAJB5,DPYD,DSCAM,DTNA,DUSP1,EBF3,EDNRB,EGR3,ELL2,EPHX1,EPM2A,ERRFI1,EXTL3,FARSB,FBXO33,FGF13,FGF7,FOXC1,FOXF1,FOXF2,FOXP1,FRRS1L,FYN,GA…	212
Cellular Growth and Proliferation,Tissue Development	Proliferation of epithelial cells	2e-12	A4GNT,ABCB4,AHR,ANGPTL6,APLN,AQP11,ATF2,ATF3,ATM,B2M,BCL2,BCL2A1,BIRC2,BMP5,BMP6,BMPR1A,BNC1,BTRC,CAV1,CCND2,CCND3,CCNG2,CDC25B,CDC37,CDK2,CDK6,CDKN1B,CDKN2C,CEBPA,CERS2,CITED2,CLEC4G,CLU,CTNNA1,CTNNB1,CTSV,DAB2,DAB2IP,DDX5,DICER1,DKK1,DLC1,DLX5,DSG4,DUSP10,E2F7,EDNRA,EDNRB,EFNB2,EGFR,ENTPD5,EPAS1,EPGN,EPHA2,ERBB3,ERBIN,ERN1,ERRFI1,ESR2,EYA1,FER,FGF10,FGF7,FGF9,FN1,FOXF1,FOXF2,FOXP2,FRS2,FSHB,FST…	202
Cellular Development	Differentiation of nervous system	2.17e-12	ABL1,ABL2,ADRA2B,ADRA2C,AIFM1,ALK,ALKAL2,APLNR,ARHGAP32,ARHGEF2,ATF5,ATM,ATP2C1,BAG1,BCL2,BDNF,BHLHE22,BMP2,BMP6,BRINP2,BTG4,CAV1,CDC25B,CDK5R1,CDK5R2,CDK5RAP3,CDKN1B,CDKN2C,CHRDL1,CNR1,CNTN1,CNTN4,COPS5,CTDSP1,CTNNB1,DAB1,DICER1,DIXDC1,DLX5,DNMT3B,DOCK4,DOK5,DRGX,DUSP10,EBF1,EBF3,ECT2,EED,EFNA1,EGFR,EIF4ENIF1,ELAVL2,ELAVL4,EOMES,EPHA2,ERBB3,EXOC4,EXT1,EYA1,FEV,FGF10,FGF20,FGF4,FGF7,FMR1,FN1,FOXA…	215
Cellular Development,Connective Tissue Development and Function,Tissue Development	Differentiation of connective tissue cells	2.24e-12	ABL1,ACVR1,ACVR2B,ADAM17,ADGRF5,ADK,ADRB1,AHR,ALOX5,AP1S2,ARID5B,ARL4A,ARL6,ASF1A,ATAT1,ATF2,ATF5,ATM,ATP6V0D2,ATRAID,BCL2,BMP2,BMP3,BMP5,BMP6,BMPR1A,BMPR1B,BNIP3,C1QTNF3,CALCB,CALCR,CAMK4,CAPNS1,CCL3,CCN2,CCN3,CCN4,CCNC,CCNY,CD200,CD47,CDK6,CEBPA,CEBPD,CMTM7,COPRS,CREB1,CREB3L2,CRK,CTBP2,CTNNB1,DACT1,DDIT3,DDX5,DICER1,DKK1,DKK2,DLK2,DLX3,DLX5,EBF1,EFEMP1,EFNB2,EGFR,EGLN1,EGLN3,EPHA2,ERBB3,F2RL1,…	257
Digestive System Development and Function	Development of digestive system	2.48e-12	ACVR1,ACVR2B,AHR,AMTN,AQP5,ARID5B,ASPH,ASPN,ATF2,ATF3,ATF7,BCL2,BCL2L11,BDNF,BMP2,BMP5,BMPR1A,BNC2,CASP9,CCND2,CCND3,CEBPA,CHD7,CIAPIN1,CITED2,CLCN5,CLU,COBL,CSRNP1,CTNNB1,CTNND1,DACT1,DCHS1,DICER1,DKK1,DLX3,DLX5,DMP1,EDAR,EDARADD,EDNRB,EGFR,ERBB3,ERG,EYA1,FGF10,FGF4,FGF9,FN1,FOXA2,FOXC1,FOXF1,FOXF2,FOXO1,FST,FZD1,GABRA2,GABRA3,GABRA5,GABRA6,GABRB1,GABRB2,GABRE,GABRP,GABRR1,GATA4,GATA6,GLI3,GRIN2…	181
Cell Death and Survival	Cell viability of tumor cell lines	2.91e-12	ABCA1,ABL1,ABL2,ACER2,ACKR3,ACVR2B,ADAM17,ADK,AEN,AGPS,AHR,AIFM1,AK3,AKAP5,ALCAM,ALK,ALKBH3,ALS2,ANAPC1,ANGPT2,ANKS1B,ANLN,ASF1A,ATF1,ATF2,ATF3,ATF5,ATG4B,ATM,ATP2C1,ATP5MD,ATR,AURKA,AURKB,B2M,BAG1,BCL2,BCL2A1,BCL2L11,BCR,BDNF,BHLHE40,BID,BIRC2,BLK,BMP2,BMP5,BMPR1A,BNIP3,BTRC,CAMK2N1,CAMKK2,CASP2,CASP9,CAV1,CBL,CCDC117,CCL18,CCN2,CCN3,CCNB1,CCND2,CCND3,CCNG1,CD151,CD1D,CD200,CDC42BPA,CDCA8,CDK2,C…	393
Cancer,Organismal Injury and Abnormalities	Lymphoreticular neoplasm	3.07e-12	ABAT,ABCB4,ABCG1,ABCG5,ABL1,ABL2,ABRAXAS2,ACSM3,ADAM17,ADAM9,ADAMTS3,ADCY7,ADCYAP1R1,ADGRA2,ADGRF5,ADRA2C,ADRB1,AGAP5 (includes others),AGBL4,AHI1,AHR,AIFM1,AKAP5,ALG10B,ALK,ALOX5,AMACR,AMMECR1,ANAPC1,ANGPT2,ANK3,ANKFY1,ANKHD1/ANKHD1-EIF4EBP3,ANKIB1,ANKRD36,ANKRD50,ANKS1B,APLNR,APOBEC3A,APOBEC3B,AQP7,ARHGAP17,ARHGAP6,ARHGEF3,ARID2,ARID3A,ARID4B,ARID5B,ARIH1,ARMC9,ART3,ATF2,ATF3,ATF7,ATF7IP,ATL1,A…	874
Embryonic Development,Organismal Development	Growth of embryo	3.28e-12	ABCA1,ACVR1,ACVR2B,ADRA2B,AGO1,APLN,APLNR,ARC,ARPP19,ATF2,ATF7,ATM,BDNF,BMP2,BMP6,BMPR1A,BMPR1B,CASP9,CDK2,CDK6,CDKN1B,CDKN2C,CEP120,CFL1,CITED2,CLU,CNR1,CNR2,COPS5,CSF3,CTNNA1,CTNNB1,CX3CL1,DAGLA,DDX11,DICER1,DKK1,DLX3,E2F3,EED,EGFR,EGLN1,EOMES,EPAS1,EPN1,ESPL1,ESR2,F2RL1,FGF10,FGF4,FGF7,FGF9,FLII,FMR1,FOXA2,FOXF1,FOXG1,FOXP2,FRS2,FSTL1,FXR2,FZD3,GAB2,GAP43,GATA4,GDNF,GDPD5,GJC1,GLB1,GLI3,GNA13,…	200
Connective Tissue Development and Function,Skeletal and Muscular System Development and Function,Tissue Development	Morphology of bone	3.3e-12	ABCB4,ABL1,ACVR2B,ADAM17,AHR,AKAP11,ARID5B,ARL6,ATP6V0D2,ATXN1L,BMP2,BMP6,BMPR1B,CALB1,CALCB,CALCR,CAMK4,CAPNS1,CAV1,CBX2,CCN2,CCN3,CCN4,CCP110,CD200,CD47,CD80,CDK20,CDKN1B,CDO1,CHD7,CNMD,CNR1,CNR2,COL9A1,CREB3L2,CRKL,CRTAP,CRY1,CSF3,CTNNB1,CTSV,CYP1B1,CYP51A1,DACT1,DCHS1,DERL2,DIO1,DKK1,DLX5,DMP1,DNAJC21,DNMT3B,E2F3,E2F4,E2F5,EBF1,EDNRA,EFEMP1,EFNB2,EGFR,ERRFI1,ESR2,EVX2,EXT1,EYA1,FGF10,FMR1,FOX…	244
Developmental Disorder	Midline defect	3.57e-12	ACVR2B,ADRA2B,ADRA2C,AHR,ARHGAP29,ASPH,ATP2C1,BAG6,BCL10,CASP9,CCNE2,CCP110,CDK20,CFL1,CITED2,CNN3,CRK,CRKL,CTNND1,CYP51A1,DACT1,DHFR,DICER1,DLC1,DLX5,DNMT3B,EDNRA,EFNA5,EGFR,EPHA7,ESR2,F2RL1,FGF10,FGF9,FKBP1A,FOXC2,FOXF2,GATA4,GATA6,GPC3,GSKIP,HECTD1,HES1,HKDC1,INSIG1,INSIG2,IRF6,ITGAV,ITGB1,ITGB8,JMJD6,JUN,KCNJ2,LAMC1,LHX8,LPAR1,LRP6,MAP3K4,MAPK8,MAPK9,MDM4,MEIS2,MESP2,MMP16,MN1,MRTFB,MSTN,MTRR…	126
Cell Morphology,Nervous System Development and Function,Neurological Disease,Tissue Morphology	Abnormal morphology of neurons	3.82e-12	AATK,ABCD2,ABI2,ABL2,ADAMTS4,AIPL1,ALS2,AP3M2,ATM,ATXN1,ATXN3,B2M,B4GALNT1,BACE1,BCAS1,BCL2,BCL2L11,BDNF,BID,BMPR1B,CACNA1C,CACNG8,CALB1,CAMK4,CAMKK2,CAPRIN1,CASP2,CASP9,CAV1,CCDC88A,CCND2,CD47,CDK5R1,CDK5R2,CDNF,CHL1,CHMP2B,CLCN3,CLN5,CLP1,CNR2,CNTFR,CNTN1,CNTN6,COL13A1,COL25A1,COQ9,CPEB4,CRMP1,CTNNA2,CTSB,CTSD,CX3CL1,DACT1,DCX,DDHD2,DICER1,DLGAP2,DLX5,DNAJC5,DSCAM,DTNA,DUSP1,EGLN1,EGLN3,EGR3,EI…	216
Cancer,Organismal Injury and Abnormalities	Cancer of head	4.06e-12	ABCA1,ABCA2,ABL1,ACAD11,ACVR1,ACY1,ADAM10,ADAM9,ADAMTS4,ADD3,ADGRB3,AIFM1,AKAP11,AKAP12,ALAD,ALK,AMMECR1,AMMECR1L,ANGPT2,ANKS1B,ANKZF1,AP2B1,ARHGAP18,ARID2,ARID4B,ARID5B,ARL13B,AS3MT,ASB5,ASPH,ASPN,ATP13A3,ATP6V0A2,ATRNL1,ATXN1,ATXN3,ATXN7L3,BAG1,BAHD1,BAP1,BAZ2B,BCL2,BDP1,BHLHE22,BLK,BMPR1B,BNC2,BRPF3,BTF3L4,C16orf72,C6orf118,CACNA1E,CALB1,CAMSAP2,CBLL1,CCDC126,CCDC73,CCDC85A,CCDC88A,CCN2,CCN6,C…	495
Cell Morphology	Sprouting	4.1e-12	ABL1,ABL2,ADAM10,ADAMTS3,ADAMTS4,ADCY6,ADGRA2,AKAP5,ANG,ANGPT2,ANKRD27,ARHGAP32,ATF3,ATXN1,BACE1,BASP1,BCL2,BDKRB2,BDNF,BSN,CALD1,CAMK4,CAMKK2,CAPNS1,CAV1,CCDC88A,CDK2,CDK5R1,CDK5R2,CFL1,CHMP2B,CNR1,COL25A1,CPEB4,CREB1,CRMP1,CTBP2,CTNNA2,CTNND1,CTNND2,DAB2IP,DACT1,DCX,DICER1,DOCK1,DSCAM,DTNBP1,EFNA5,EFNB2,EGR3,EIF4EBP2,ELAVL4,ELMO1,EMB,EPS8,ERC2,ETS1,FAM107A,FER,FGF4,FGF7,FMR1,FNBP1,FOXC2,FYN,GAP…	180
Neurological Disease,Organismal Injury and Abnormalities	Seizures	5.32e-12	AARS1,ABAT,ABCC8,ABCD2,ADAM10,ADRA2B,AKAP5,ANK3,AP3B2,AP3M2,ARC,ARHGAP32,ARID5B,ARRDC3,ATF3,ATOX1,B4GALNT1,BACE1,BAK1,BBC3,BDNF,BHLHE40,BID,BSN,C4A/C4B,CA1,CA3,CACNA1E,CACNA2D1,CACNA2D2,CACNB4,CDK5R1,CDK5R2,CEBPD,CHD2,CHST6,CITED2,CLCN3,CNPY3,CNR1,CTSB,CTSD,CXCL2,CYP2C19,CYYR1,DEPDC5,DNAJB5,DTNA,DUSP1,EGR3,ELAVL4,ELL2,EPM2A,ERRFI1,FBXO33,FGF13,FGF7,FKBP1A,FMR1,FRRS1L,G6PC,GABBR1,GABRA2,GABRA3,GAB…	207
Nervous System Development and Function,Organ Morphology,Organismal Development	Size of brain	6.41e-12	AATK,AHI1,AIFM1,AKTIP,AP4E1,ATF2,B4GALNT1,BAK1,BDNF,BMPR1A,BMPR1B,CASP9,CAV1,CDK5R1,CDK5R2,CDKN1B,CLCN3,CPEB4,CTNNB1,DICER1,DKK1,DSCAM,E2F3,EBF1,EFNA5,EGFR,EIF4E2,EPB41L2,ESR2,FOXA2,FOXO3,FSCN1,FYN,FZD3,GAP43,GDNF,GLI3,GPM6B,GPR85,IGF1R,ITGB1,ITPR1,KHDRBS1,KHDRBS2,KIDINS220,KIF14,KIF5C,KLF4,L1CAM,LAMC1,LAMP2,LMX1B,MAGOH,MAPK7,MCPH1,MYB,MYO16,NEUROD1,NOG,NYAP1,NYAP2,OPHN1,OTX2,PAFAH1B1,PAX6,POSTN,…	89
Behavior	Cognition	6.73e-12	ABCC8,ABI2,ABL2,ADAM10,ADGRB3,ADGRL2,ADRA2C,ADRB1,AKAP5,AP1S2,ARC,ARF4,ASIC1,ATM,ATP8A1,ATXN1,ATXN1L,ATXN3,BACE1,BCL2,BDNF,BMPR1A,BMPR1B,CACNA1C,CACNA1E,CALB1,CAMK4,CAMKK2,CAPNS1,CBLN2,CCDC88A,CCK,CCN2,CCND2,CD47,CDK5R1,CEBPA,CEBPD,CERS6,CFL1,CHD7,CHL1,CHMP2B,CNR1,CREB1,CRH,CRHR2,CRMP1,CSF3,CSK,CTNND2,CYP2D6,DDHD2,DFFA,DGCR2,DICER1,DKK1,DLGAP2,DTNBP1,EIF4EBP2,ELAVL4,EPM2A,ESR2,FAM107A,FGF13,FMR1,…	210
Cellular Assembly and Organization,Cellular Function and Maintenance	Organization of actin cytoskeleton	8.52e-12	ABL1,ABL2,ACTR2,AKAP11,AKAP12,ARHGAP12,ARHGAP17,ARHGAP18,ARHGAP6,ARHGEF18,ARHGEF2,ARPC5,ATP2C1,ATXN3,AVIL,BCL2,BCR,CAP2,CAV3,CCDC88A,CD2AP,CD47,CDC42BPA,CDK5R1,CFL1,CFL2,CLU,COBL,CORO1C,CRHR2,CRK,CTTN,CXADR,CXCL1,CXCL9,DIXDC1,DLC1,DNAJB6,DTNBP1,EFNA1,EFNA5,EGFR,ELMO1,EMP2,ENAH,EPB41L2,EPHA3,EPS8,EZR,F2RL1,FAM107A,FAT1,FER,FGF10,FGF7,FLII,FN1,FSCN1,GAB1,GAS2L3,GPM6B,HAS2,HCK,IKBKB,IL1A,ITGB1,KLHL1…	133
Organismal Survival	Neonatal death	8.89e-12	ABL1,ACKR3,ADAM17,ADAM9,ADGRA2,ADRA2B,AFF4,APBA2,ARID5B,ATF2,ATG12,ATG16L1,ATG9A,ATM,ATXN1L,B3GNT5,BAG6,BAK1,BCR,BDNF,CAPRIN1,CBX2,CCDC47,CCN2,CCND3,CCP110,CDK2,CDK6,CEBPA,CEBPD,CELF2,CERS3,CLEC1B,CLPTM1L,CNN3,CNTFR,COL25A1,CPLX3,CREB3L2,CTNNA2,DACT1,DERL2,DIO3,DKK1,DSCAM,EHHADH,EIF4E2,ELAVL4,EPAS1,EYA1,F11,F2RL1,FGF10,FGF9,FOXF2,FST,FSTL1,FUBP1,FXR1,GATA4,GDNF,GNA11,GNAQ,GPHN,GRIN2B,GSKIP,GSX2,H…	184
Cellular Development,Cellular Growth and Proliferation,Nervous System Development and Function,Tissue Development	Outgrowth of neurites	1.09e-11	AATK,ACAP2,ADAM10,ADAM17,ALK,ALS2,APBA2,APBB2,ARHGAP17,ARHGAP32,BAG1,BASP1,BCL2,BDNF,CABLES1,CAMK1,CCK,CDC42BPA,CDK2,CDK5R1,CDK5R2,CELF2,CNR1,CREB1,CXCL9,DAB2IP,DCX,DLX5,DOCK1,DTNBP1,EEA1,EFNB2,EGFR,EGR3,EIF5A,ELAVL4,ELMO2,EPHA2,EPN1,ESR2,EXOC4,EXOC5,EXT1,EXTL3,EZR,FAIM,FAM107A,FGF4,FGF7,FN1,GAB1,GAL,GAP43,GDAP1,GDNF,GNAQ,GPHN,GPM6A,GPR12,GPR3,GPR6,HDGFL3,HGF,IGF1R,IKBKB,IL17A,IL6ST,IMPACT,ITGA1,…	145
Cellular Development,Cellular Growth and Proliferation,Nervous System Development and Function,Tissue Development	Outgrowth of neurons	1.11e-11	AATK,ACAP2,ADAM10,ADAM17,ALK,ALS2,APBA2,APBB2,ARHGAP17,ARHGAP32,BAG1,BASP1,BCL2,BDNF,CABLES1,CAMK1,CCK,CDC42BPA,CDK2,CDK5R1,CDK5R2,CELF2,CNR1,CREB1,CXCL9,DAB2IP,DCX,DLX5,DOCK1,DTNBP1,EEA1,EFNB2,EGFR,EGR3,EIF5A,ELAVL4,ELMO2,EPHA2,EPN1,ESR2,EXOC4,EXOC5,EXT1,EXTL3,EZR,FAIM,FAM107A,FGF4,FGF7,FN1,GAB1,GAL,GAP43,GDAP1,GDNF,GNAQ,GPHN,GPM6A,GPR12,GPR3,GPR6,HDGFL3,HGF,IGF1R,IKBKB,IL17A,IL6ST,IMPACT,ITGA1,…	147
Cellular Movement,Hair and Skin Development and Function	Cell movement of epithelial cell lines	1.17e-11	AHR,ALCAM,ARF4,ARHGEF12,CCR8,CDH11,CHL1,CLASP1,CLU,CNR1,CPEB1,CREB3L2,CTTN,CUZD1,CXCL1,DLC1,DOCK1,DOCK4,EGFR,EPHA2,ERRFI1,FGA,FHIT,FN1,FOXO1,FSCN1,FYN,GAB1,GAP43,GRB2,HARS1,HGF,HMG20A,HTN1,IGF1R,INHBA,ITGA1,ITGB1,ITGB2,KDM3A,KIF2A,KRAS,L1CAM,MAP3K5,MAPRE1,MSN,MYH10,NARS1,NFKB1,NRAS,PAK1,PLAU,POSTN,PRKCE,PTEN,PTP4A1,PTPN12,QKI,RAC1,RASSF1,RECK,RHOA,RICTOR,RUNX2,SARS1,SELE,SHC1,SMAD4,SRC,SRSF1,STAT…	77
Organismal Injury and Abnormalities	Benign lesion	1.29e-11	ABCA1,ABCA8,ABI2,ABL1,ACKR3,ACSF2,ADCYAP1R1,ADGRB3,ADGRE5,ADRA2B,ADRA2C,ADRB1,AHCYL1,AHR,AJUBA,ALCAM,ANGPT2,ANGPTL1,ANKIB1,AP2S1,AQP8,ARHGEF2,ARL4D,ASB5,ATF2,ATM,ATP2C1,ATR,ATRNL1,AURKB,BACE2,BAK1,BAP1,BBC3,BCL10,BCL2,BCL2L11,BDKRB2,BDNF,BID,BMP5,BTRC,C10orf105,C2orf88,CA1,CACNB2,CALB1,CAV1,CAVIN2,CBL,CCDC80,CCK,CCL3,CCNB1,CCNC,CCND2,CCND3,CCNE2,CDC25B,CDC42EP3,CDK2,CDKN1B,CDKN2C,CEACAM6,CEACAM7,…	399
Organismal Development,Organismal Injury and Abnormalities	Abnormal morphology of thoracic cavity	1.29e-11	ABCA1,ABCA5,ABCC8,ABL1,ABL2,ACE2,ACKR3,ACVR2B,ADAM10,ADAM17,ADAM9,ADAMTS18,ADGRF5,ADK,ADRA2B,ADRA2C,ADRB1,AFF4,AHR,AIFM1,AKAP12,ANGPT2,APLN,APLNR,ARHGEF12,ARID3A,ATF2,ATF3,ATM,ATXN1,ATXN1L,BCL2,BID,BIRC2,BNIP3,CACNA1C,CACNA2D1,CACNB1,CACNB2,CACNB4,CAMK4,CAPNS1,CAV1,CAV2,CAV3,CBL,CCN2,CCN3,CCND2,CCND3,CCNT1,CCP110,CD28,CD2AP,CD69,CDC42EP3,CDK2,CDK5R1,CDK6,CDKN1B,CDKN2C,CEBPA,CIAPIN1,CITED2,CLEC1B,…	364
Embryonic Development,Organismal Development	Morphogenesis of embryo	1.42e-11	ACVR2B,AKTIP,ASPH,ATF2,ATP6AP2,BAG6,BAK1,BCL2,BMP2,BMPR1A,BMPR1B,CACNA1C,CHD7,CHST11,CITED2,COBL,CRKL,CTNNB1,CX3CL1,DACT1,DCHS1,DICER1,DKK1,DLX5,EGFR,EPHA2,EVX2,EYA1,FGF10,FGF4,FGF7,FGF9,FLRT3,FOXD1,FOXF1,FZD1,FZD3,GATA4,GDNF,GLI3,GNAQ,GPC3,GREM1,GRHL2,HAND2,HES1,HEYL,HOXA10,HOXA11,HOXA9,HOXD10,HOXD13,HTR2B,IFT52,ISL1,ITGA8,JUN,LGR4,LHX1,LMBR1,LMX1B,LRP4,LRP6,MAB21L2,MAP3K20,MBNL1,MECOM,MED1,MEF2…	118
Cell-To-Cell Signaling and Interaction,Nervous System Development and Function	Synaptic transmission	1.64e-11	AKAP12,AKAP5,ALS2,ANKS1B,APBA2,ARC,ASIC1,ATXN1,ATXN3,BACE1,BCR,BDNF,BSN,CACNA1C,CACNB2,CACNB4,CACNG8,CAMK4,CAV2,CDH11,CLCN3,CNR1,CRH,CTNNB1,DNAJC5,DTNA,EGR3,EIF4EBP2,EPS8,ERC2,EXOC4,FGF14,FMR1,FSTL1,FYN,GABBR1,GABRA3,GABRA5,GABRB2,GAD2,GAL,GJC1,GJD2,GLRA3,GLS,GNAI1,GNAQ,GRIA1,GRIA4,GRID2,GRIK2,GRIK4,GRIN2B,GRM1,GRM5,GRM7,HOMER1,HTR1A,HTR1B,HTR4,ITGB1,ITPR1,KALRN,KCND2,KCNJ6,KCNJ9,KCNMB1,KIF17,KIF…	149
Cell-To-Cell Signaling and Interaction,Nervous System Development and Function	Neurotransmission	1.8e-11	AKAP12,AKAP5,ALS2,ANK3,ANKS1B,APBA2,ARC,ARF4,ARF5,ASIC1,ATXN1,ATXN3,BACE1,BCR,BDNF,BSN,CACNA1C,CACNB2,CACNB4,CACNG8,CAMK4,CAV2,CD47,CDH11,CLCN3,CNR1,CRH,CRHR2,CTNNB1,DNAJC5,DTNA,EGR3,EIF4EBP2,EPS8,ERC2,ESR2,EXOC4,FEV,FGF14,FMR1,FOXO1,FSTL1,FYN,GABBR1,GABRA3,GABRA5,GABRB2,GAD2,GAL,GDAP1,GJC1,GJD2,GLRA3,GLS,GNA11,GNAI1,GNAQ,GRIA1,GRIA4,GRID2,GRIK2,GRIK4,GRIN2B,GRM1,GRM5,GRM7,HCN1,HCN3,HOMER1,HTR1A,…	178
Neurological Disease	Neurological signs	2.02e-11	ABCD2,ADCY7,ADRA2B,ADRA2C,ADRB1,AHCYL1,ALS2,ANGPTL6,APLNR,ARHGAP32,ARPP19,ASIC1,ATM,ATP5MG,ATP6AP2,ATXN1,B2M,B3GNT2,B4GALNT1,B4GAT1,BACE1,BASP1,BCL2,BDNF,BHLHE22,BHLHE40,BIRC2,C4A/C4B,CALB1,CAMK4,CAMKK2,CASP2,CASP9,CAV1,CCDC88A,CCN2,CD160,CDH11,CDK5R1,CDR1,CHAF1B,CHRM5,CHRNA6,CHRNA9,CLU,CNR1,CNR2,COX7B,COX7C,CREB1,CTNNB1,CX3CL1,CYCS,CYP2D6,CYP51A1,DDC,DDHD2,DDIT3,DDX60L,DICER1,DIRAS2,DNAJA1,DTNA,…	289
Cellular Movement	Cell movement of tumor cell lines	2.05e-11	ABCA1,ACKR3,ACVR1,ADAM10,ADAM17,ADAM9,ADGRE5,ADGRF5,AHR,AJAP1,AKAP11,AKAP12,ALCAM,ANGPT2,AQP5,AQP8,ARHGAP21,ARRDC3,ASIC1,ASPH,ATF2,ATF3,ATOX1,AURKA,B4GAT1,BAG1,BCL10,BDKRB2,BDNF,BHLHE41,BMP2,BMP6,CALD1,CALU,CAMKK2,CAPNS1,CAV1,CBL,CCDC88A,CCL18,CCL22,CCL3,CCL3L1,CCL7,CCN2,CCN3,CCN4,CCNH,CCR8,CCR9,CD151,CD28,CD47,CD69,CDC25B,CDH11,CDK14,CDKN1B,CDKN3,CEBPA,CEBPD,CERS6,CERT1,CKLF,CLCN3,CLEC1B,CLIC4,C…	433
Nervous System Development and Function,Tissue Morphology	Quantity of neurons	2.11e-11	ABCA1,ABL1,ABL2,ACVR1C,ADAM10,ADAMTS4,AIFM1,AKAP5,ALS2,ANK3,ARC,ATAT1,ATF2,ATM,ATP2C1,ATXN1,ATXN3,B2M,BACE1,BAK1,BCL2,BDNF,BMP2,BMPR1A,BMPR1B,BSN,CACNA1C,CACNA2D1,CACNA2D2,CAMK4,CANX,CASP2,CASP9,CBLN4,CCND2,CDK5R1,CDKN1B,CDNF,CLCN3,CNTFR,COL25A1,CTNNB1,CTSD,CX3CL1,DICER1,DKK1,DSCAM,DUSP1,EGFR,EGR3,EIF4EBP2,EPHA7,EPM2A,EPS8,ERBB3,ERBIN,ERC2,ESR2,EYA1,FEV,FGF13,FGF20,FGF7,FMR1,FOXA1,FOXA2,FST,FYN,G…	189
Cellular Growth and Proliferation	Outgrowth of cells	2.4e-11	AATK,ACAP2,ADAM10,ADAM17,ALK,ALS2,APBA2,APBB2,ARHGAP17,ARHGAP32,BAG1,BASP1,BCL2,BDNF,CABLES1,CAMK1,CAMK4,CCK,CD274,CDC42BPA,CDK2,CDK5R1,CDK5R2,CEBPD,CELF2,CNR1,CREB1,CXCL2,CXCL9,DAB2IP,DCX,DLX5,DOCK1,DTNBP1,EEA1,EFNB2,EGFR,EGR3,EIF5A,ELAVL4,ELMO2,EPHA2,EPN1,ESR2,EXOC4,EXOC5,EXT1,EXTL3,EZR,FAIM,FAM107A,FGF4,FGF7,FN1,GAB1,GAL,GAP43,GDAP1,GDNF,GNAQ,GPHN,GPM6A,GPR12,GPR3,GPR6,HDGFL3,HGF,HSP90AA1,IGF1…	158
Cell Death and Survival	Cell death of connective tissue cells	3.14e-11	A4GALT,ABCE1,ABL1,ABL2,ADIPOR2,AHR,AIFM1,APLN,ATF2,ATF3,ATF5,ATG16L1,ATM,ATP6AP2,ATR,BACH2,BAK1,BAP1,BBC3,BCL2,BCL2A1,BCL2L11,BCL2L14,BID,BIRC2,BMP2,BMPR1A,BMPR1B,BNIP3,BTRC,CA3,CALB1,CAPNS1,CASP2,CASP9,CCDC47,CCDC80,CCNB1,CCNC,CCNG1,CD1D,CD300LD,CDK2,CDKN1B,CEBPA,CLIC4,CLU,CNR1,CNR2,COPS5,CREB1,CREB3L2,CRK,CRKL,CTBP2,CTNNB1,CTSB,CTSD,CTSV,CYCS,CYP1B1,DAPK1,DDIAS,DDIT3,DDX58,DFFA,DHCR24,DICER1,DK…	235
Cancer,Organismal Injury and Abnormalities,Reproductive System Disease	Prostatic carcinoma	3.51e-11	AAK1,ABCA1,ABCB4,ABCC8,ABHD13,ABL1,ABL2,ACAD8,ACOT7,ACP3,ACP5,ACSF2,ACSM1,ACTR1A,ACY3,ADAM10,ADAM17,ADAM7,ADAM9,ADAMTS4,ADCY6,ADCY7,ADD3,ADGRA2,ADGRB3,ADGRE1,ADGRE5,ADRA2B,ADRA2C,ADRB1,AGPAT4,AGPAT5,AHRR,AKAP11,AKAP12,ALG11,ALK,ALKBH3,ALS2,AMPD3,ANAPC1,ANGPTL1,ANK3,ANKFY1,ANKHD1/ANKHD1-EIF4EBP3,ANKRD27,ANKS1B,ANLN,AOAH,AP2A2,AP3B2,APPL1,ARAP2,ARF5,ARFGAP2,ARFGAP3,ARFGEF3,ARHGAP12,ARHGAP18,ARHGAP2…	1074
Cell Morphology,Nervous System Development and Function,Tissue Morphology	Morphology of neurites	3.8e-11	AATK,ABCD2,ABL1,ARC,ATM,ATXN1,ATXN3,B4GALNT1,BCAS1,BDNF,BMP2,BMPR1A,CACNA2D2,CAMK4,CAMKK2,CAPRIN1,CAV1,CCND2,CD2AP,CD47,CDK5R1,CHL1,CNTN1,COQ9,CTSB,CTSV,DCX,DIXDC1,DUSP1,EGLN3,EGR3,EPB41L3,EPHA7,ERBIN,ESR2,FER,FMR1,FOXA1,FOXA2,GABBR1,GAL,GAL3ST1,GAP43,GDAP1,GDI1,GDNF,GPM6B,GRIA1,GRID2,GRIP1,GRM5,HGF,IKBKB,ITPR1,KALRN,KATNA1,KIDINS220,KIF23,KIF2A,KIF5A,L1CAM,LGI1,LMNA,MAPK10,MARVELD1,MET,MOG,MSN,M…	111
Cell Death and Survival	Apoptosis of neurons	3.95e-11	AARS1,AATK,ABL1,ADAM17,ADCYAP1R1,AIFM1,AMIGO2,ATF2,ATF3,ATM,ATP2C1,B4GALNT1,BACE1,BAG1,BAG6,BAK1,BBC3,BCL2,BCL2L11,BDNF,BID,BMPR1B,BNIP3,BTG1,CACNA2D2,CALB1,CAPRIN1,CASP2,CASP9,CCNB1,CD200,CDK5R1,CHL1,CNR1,CNTFR,COL25A1,COQ9,CPEB4,CREB1,CSF3,CTNNB1,CTSB,CTSV,CYCS,DDIT3,DFFA,DKK1,DNAJC5,DUSP1,EGLN3,ELAVL4,EPHA7,EPM2A,ERBB3,ESR2,FAIM,FAM162A,FGF20,FMR1,FN1,FOXO1,FOXO3,FOXQ1,FYN,GABRA5,GABRB2,GAL,GB…	178
Cell Morphology	Morphology of cellular protrusions	5.25e-11	AATK,ABCD2,ABL1,ABL2,ARC,ATM,ATXN1,ATXN3,B4GALNT1,BCAS1,BDNF,BMP2,BMPR1A,CACNA2D2,CAMK4,CAMKK2,CAPRIN1,CAV1,CCND2,CD2AP,CD47,CDC14A,CDK5R1,CHL1,CNR1,CNR2,CNTN1,COQ9,CTNNB1,CTSB,CTSV,CTTN,DAAM1,DCX,DIXDC1,DUSP1,EGLN3,EGR3,EPB41L3,EPHA7,EPS8,ERBIN,ESR2,FER,FHDC1,FMR1,FNBP1L,FOXA1,FOXA2,FSCN1,GABBR1,GAL,GAL3ST1,GAP43,GDAP1,GDI1,GDNF,GPM6B,GRIA1,GRID2,GRIP1,GRM5,HGF,IKBKB,ITK,ITPR1,KALRN,KATNA1,KIDIN…	137
Cellular Development	Differentiation of tumor cell lines	6.66e-11	ACVR1,ACVR1C,ADAM10,ADRB1,AHR,AJUBA,AKAP5,ALK,ALKAL2,ARHGAP32,ATF2,ATM,ATP2C1,B4GALNT1,BAG1,BCL2,BDNF,BHLHE40,BMP2,CBL,CCN2,CCN3,CDH11,CDK2,CDK5R1,CDK6,CDKN1B,CEBPA,CEBPD,CNOT9,CREG1,CRK,CSF3,CTDSPL,CTNNB1,DAB2,DDIT3,DICER1,DUSP1,E2F4,EGFR,EID1,ELAVL2,ERBIN,FABP2,FGF9,FLI1,FN1,FOXA1,FOXG1,FOXO3,FOXP1,FRS2,FST,GATA4,GCNT1,GPR12,GRB2,GREM1,GRHL2,HES1,HGF,HMG20B,HOXA10,HOXA5,IFNA1/IFNA13,IGF1R,IL17R…	157
Neurological Disease	Dyskinesia	6.81e-11	ABCD2,ADCY7,ADRA2B,ADRA2C,ADRB1,AHCYL1,ALS2,APLNR,ARHGAP32,ARPP19,ATP5MG,ATP6AP2,ATXN1,B2M,B3GNT2,B4GALNT1,B4GAT1,BASP1,BCL2,BDNF,BHLHE22,BHLHE40,BIRC2,C4A/C4B,CALB1,CAMK4,CAMKK2,CASP2,CASP9,CAV1,CCN2,CD160,CDH11,CDK5R1,CDR1,CHAF1B,CHRM5,CHRNA6,CHRNA9,CLU,CNR1,CNR2,COX7B,COX7C,CREB1,CTNNB1,CX3CL1,CYCS,CYP2D6,CYP51A1,DDC,DDIT3,DDX60L,DIRAS2,DNAJA1,DTNA,DYNC1I1,ELAVL2,ELMO1,ENO3,ENPP5,EPHA4,FAM107A…	246
Cell Morphology	Shape change of neurites	7.84e-11	ABL2,ADAM10,ADAMTS3,ADAMTS4,AKAP5,ANKRD27,ARHGAP32,ATF3,ATXN1,BACE1,BDNF,BSN,CALD1,CAMK4,CAMKK2,CAPNS1,CAV1,CCDC88A,CDK5R2,CFL1,CHL1,CHMP2B,CNR1,COL25A1,CPEB4,CREB1,CRMP1,CTNNA2,CTNND2,DAB2IP,DACT1,DCX,DICER1,DOCK1,DSCAM,DTNBP1,EFNA5,EGR3,EIF4EBP2,ELAVL4,ELMO1,EPHA4,EPS8,FAM107A,FER,FGF4,FGF7,FMR1,FNBP1,GAP43,GDNF,GJB2,GNA13,GRM5,HGF,HMGB1,ITGB1,KALRN,KIDINS220,KIF2A,L1CAM,LEP,LGI1,LRRC4,LRRC7,LY…	141
Cell Morphology,Cellular Assembly and Organization,Cellular Development,Cellular Function and Maintenance,Cellular Growth and Proliferation,Nervous System Development and Function,Organismal Development,Tissue Development	Branching of neurons	7.84e-11	ABL1,ABL2,ADAM10,ADAMTS3,ADAMTS4,AKAP5,ANKRD27,ARHGAP32,ATF3,ATXN1,BACE1,BASP1,BDNF,BSN,CALD1,CAMK4,CAMKK2,CAPNS1,CAV1,CCDC88A,CDK5R2,CFL1,CHMP2B,CNR1,COL25A1,CPEB4,CREB1,CRMP1,CTNNA2,CTNND2,DAB2IP,DACT1,DCX,DICER1,DOCK1,DSCAM,DTNBP1,EFNA5,EGR3,EIF4EBP2,ELAVL4,ELMO1,EPS8,ERC2,FAM107A,FER,FGF4,FGF7,FMR1,FNBP1,FYN,GAP43,GDNF,GJB2,GNA13,GRM5,HGF,HMGB1,ITGB1,KALRN,KIDINS220,KIF2A,L1CAM,LEP,LGI1,LRRC4…	141
Cell Morphology	Shape change of neurons	7.93e-11	ABL1,ABL2,ADAM10,ADAMTS3,ADAMTS4,AKAP5,ANKRD27,ARHGAP32,ATF3,ATXN1,BACE1,BASP1,BDNF,BSN,CALD1,CAMK4,CAMKK2,CAPNS1,CAV1,CCDC88A,CDK5R2,CFL1,CHMP2B,CNR1,COL25A1,CPEB4,CREB1,CRMP1,CTNNA2,CTNND2,DAB2IP,DACT1,DCX,DICER1,DOCK1,DSCAM,DTNBP1,EFNA5,EGR3,EIF4EBP2,ELAVL4,ELMO1,EPS8,ERC2,FAM107A,FER,FGF4,FGF7,FMR1,FNBP1,FOXG1,FYN,GAP43,GDNF,GJB2,GNA13,GRM5,HGF,HMGB1,ITGB1,KALRN,KIDINS220,KIF2A,L1CAM,LEP,LGI1…	143
Cancer,Organismal Injury and Abnormalities	Upper aerodigestive tract carcinoma	8.03e-11	ABCA1,ABCA2,ABCA8,ABCB4,ABL1,ACAD11,ACO1,ACSF2,ADAM17,ADAM9,ADD3,ADGRB3,ADGRE5,ADGRL2,ADIPOR2,AGBL4,AHI1,AIFM1,AJAP1,AKAP11,ALK,ALOX5,AMMECR1,AMMECR1L,ANK3,ANKRD50,ANKS1B,ANKZF1,AP2B1,APCDD1L,AQP2,ARC,ARFGEF3,ARHGAP18,ARHGAP6,ARID2,ARID4B,ARID5B,AS3MT,ASB5,ASCC1,ASPH,ASPN,ATF2,ATF5,ATM,ATP13A3,ATP2C1,ATP5F1B,ATP6AP2,ATP6V0A2,ATRNL1,ATXN1,ATXN3,ATXN7L3,AURKA,AURKC,B2M,BAG1,BAHD1,BAP1,BAZ2B,BCL2,BD…	751
Cancer,Organismal Injury and Abnormalities	Malignant neoplasm of aerodigestive tract	1.08e-10	ABCA1,ABCA2,ABCA8,ABCB4,ABL1,ACAD11,ACO1,ACSF2,ADAM10,ADAM17,ADAM9,ADD3,ADGRB3,ADGRE5,ADGRL2,ADIPOR2,AGBL4,AHI1,AIFM1,AJAP1,AKAP11,ALK,ALOX5,AMMECR1,AMMECR1L,ANK3,ANKRD50,ANKS1B,ANKZF1,AP2B1,APCDD1L,AQP2,ARC,ARFGEF3,ARHGAP18,ARHGAP6,ARID2,ARID4B,ARID5B,AS3MT,ASB5,ASCC1,ASPH,ASPN,ATF2,ATF5,ATM,ATP13A3,ATP2C1,ATP5F1B,ATP6AP2,ATP6V0A2,ATRNL1,ATXN1,ATXN3,ATXN7L3,AURKA,AURKC,B2M,BAG1,BAHD1,BAP1,BAZ2B,…	766
Cellular Assembly and Organization	Development of cytoplasm	1.08e-10	ABL1,ABL2,ACTR2,ADGRF5,AKAP11,ANG,ANKRD27,ARHGAP18,ARHGAP19,ARHGAP32,ARHGAP6,ARHGEF10,ARHGEF12,ARHGEF18,ARHGEF2,ARHGEF3,ATG12,ATG16L1,ATG4B,ATG9A,BAG4,BDKRB2,CALD1,CAMK4,CAMSAP2,CAV1,CAV3,CBL,CCDC88A,CCN2,CD47,CDC14A,CDC25B,CDK6,CDKN1B,CERT1,CFL1,CLASP1,COBL,CREB1,CRH,CSF3,CTNND1,CTSD,CTTN,CYRIB,DAAM1,DCX,DGKA,DLC1,DSTN,EDNRA,EGFR,ELAPOR1,EPM2A,ERP29,F2RL1,FAM107A,FAM171A1,FBXW7,FER,FGF13,FHDC1,F…	206
Cellular Movement,Nervous System Development and Function	Guidance of axons	1.28e-10	ALCAM,ANK3,APBB2,B3GNT2,B4GAT1,BDNF,BHLHE22,BMPR1B,CDK5R1,CHL1,CNTN1,CNTN4,DAB1,DCX,DLX5,DOK4,DOK5,DRGX,DSCAM,EFNA5,ENAH,EPHA4,EXT1,EZR,FEZ2,FLRT3,FOXD1,FRS2,FYN,GAB1,GAB2,GAP43,GDNF,GLI3,GPC1,GRB10,GRB2,HOXA1,HS2ST1,IRS2,KIF5C,KLF7,L1CAM,LGI1,LHX1,LHX2,LMX1A,LYPLA2,MAPK1,MAPK7,MNX1,MYH10,NOG,NR4A3,NRCAM,NRP1,NRXN1,NTF3,NTN4,OPHN1,OTX2,PAX6,PDLIM7,PIK3CA,PIK3R1,PLCG1,RAC1,RANBP9,RELN,RHOA,ROBO2,R…	87
Cancer,Organismal Injury and Abnormalities,Reproductive System Disease	Prostatic adenocarcinoma	1.88e-10	AAK1,ABCA1,ABCB4,ABCC8,ABHD13,ABL1,ABL2,ACAD8,ACOT7,ACP3,ACSF2,ACSM1,ACTR1A,ACY3,ADAM10,ADAM17,ADAM7,ADAM9,ADAMTS4,ADCY6,ADCY7,ADD3,ADGRA2,ADGRB3,ADGRE1,ADGRE5,ADRA2B,ADRA2C,ADRB1,AGPAT4,AGPAT5,AHRR,AKAP11,AKAP12,ALG11,ALK,ALKBH3,ALS2,AMPD3,ANAPC1,ANGPTL1,ANK3,ANKFY1,ANKHD1/ANKHD1-EIF4EBP3,ANKRD27,ANKS1B,ANLN,AOAH,AP2A2,AP3B2,APPL1,ARAP2,ARF5,ARFGAP2,ARFGAP3,ARFGEF3,ARHGAP12,ARHGAP18,ARHGAP29,ARH…	1027
Cancer,Gastrointestinal Disease,Organismal Injury and Abnormalities	Oral tumor	1.95e-10	ABCA1,ABCA2,ACAD11,ADAM10,ADAM9,ADD3,ADGRB3,AIFM1,AKAP11,ALK,AMMECR1,AMMECR1L,ANKS1B,ANKZF1,AP2B1,ARHGAP18,ARID2,ARID4B,ARID5B,AS3MT,ASB5,ASPH,ASPN,ATP13A3,ATP6V0A2,ATRNL1,ATXN1,ATXN3,ATXN7L3,BAG1,BAHD1,BAZ2B,BCL2,BDP1,BHLHE22,BMPR1B,BNC2,BRPF3,BTF3L4,C16orf72,C6orf118,CACNA1E,CAMSAP2,CBLL1,CCDC126,CCDC73,CCDC85A,CCDC88A,CCN2,CCN6,CCNJ,CCNL2,CD274,CD46,CDC5L,CDCA2,CDKN1B,CELF2,CELSR2,CEP128,CEP25…	435
Cardiovascular Disease,Cardiovascular System Development and Function,Organ Morphology,Organismal Development,Organismal Injury and Abnormalities	Abnormal morphology of atrium	2.2e-10	ABL1,ACKR3,ADAM17,ADAM9,BIRC2,CAV3,CDK2,CDKN1B,CITED2,CRKL,CTSV,CXADR,CYP51A1,DCHS1,EDNRA,EFNA1,EGLN1,EPHA3,ERBB3,FGF9,FKBP1A,FOXC2,HAND2,HBEGF,HDAC7,HTR2B,ISL1,KIDINS220,MBNL1,MBNL2,MEF2C,MYH10,NTF3,PITX2,PKP2,SIRT1,SLC6A6,SRSF10,TBX1,TBX5,TGFB2,TH,TLL1,TNS1,TTN,UBR1,ZFPM2	47
Cellular Assembly and Organization,Cellular Function and Maintenance,Tissue Development	Formation of actin filaments	2.21e-10	ABL1,ABL2,ACTR2,ADGRF5,ARHGAP18,ARHGAP19,ARHGAP32,ARHGAP6,ARHGEF10,ARHGEF12,ARHGEF18,ARHGEF2,ARHGEF3,BAG4,BDKRB2,CALD1,CAV1,CCDC88A,CCN2,CD47,CDC14A,CDK6,CFL1,CLASP1,COBL,CREB1,CRH,CSF3,CTNND1,CTTN,CYRIB,DAAM1,DLC1,DSTN,EDNRA,EGFR,F2RL1,FAM107A,FAM171A1,FBXW7,FER,FHDC1,FHOD1,FN1,GAP43,GBA2,GNA11,GNA13,GNAQ,GNG12,GNG2,GNG5,GRB2,GSN,HCK,HGF,HTR2C,IKBKB,IL1A,ITGB1,KANK4,KRAS,LEP,LIMCH1,LMOD1,LPAR1,M…	135
Cell Morphology,Cellular Assembly and Organization,Cellular Development,Cellular Function and Maintenance,Cellular Growth and Proliferation,Embryonic Development,Nervous System Development and Function,Organismal Development,Tissue Development	Branching of neurites	2.23e-10	ABL2,ADAM10,ADAMTS3,ADAMTS4,AKAP5,ANKRD27,ARHGAP32,ATF3,ATXN1,BACE1,BDNF,BSN,CALD1,CAMK4,CAMKK2,CAPNS1,CAV1,CCDC88A,CDK5R2,CFL1,CHMP2B,CNR1,COL25A1,CPEB4,CREB1,CRMP1,CTNNA2,CTNND2,DAB2IP,DACT1,DCX,DICER1,DOCK1,DSCAM,DTNBP1,EFNA5,EGR3,EIF4EBP2,ELAVL4,ELMO1,EPS8,FAM107A,FER,FGF4,FGF7,FMR1,FNBP1,GAP43,GDNF,GJB2,GNA13,GRM5,HGF,HMGB1,ITGB1,KALRN,KIDINS220,KIF2A,L1CAM,LEP,LGI1,LRRC4,LRRC7,LYPLA1,MAP2K4…	136
Cardiovascular Disease,Cardiovascular System Development and Function	Abnormal morphology of cardiovascular system	2.72e-10	ABCA1,ABCA5,ABCC8,ABL1,ABL2,ACE2,ACKR3,ADAM10,ADAM17,ADAM9,ADGRA2,ADK,ADRA2B,ADRA2C,ADRB1,AHR,AIFM1,AKAP12,ANGPT2,APLN,APLNR,ARHGEF12,ARID3A,ARID4B,ATF3,ATXN1,BACH1,BCL2,BDKRB2,BIRC2,BMP2,BNIP3,CACNA1C,CACNA2D1,CACNB1,CACNB2,CACNB4,CAMK4,CAPNS1,CAV1,CAV3,CCN3,CCND2,CCND3,CCNE2,CCNT1,CCP110,CD151,CD2AP,CD69,CDC42EP3,CDK2,CDK5R1,CDK6,CDKN1B,CDKN2C,CDO1,CIAPIN1,CITED2,CLEC1B,CLIC4,CLU,CREB1,CRHR2,CR…	333
Cancer,Gastrointestinal Disease,Organismal Injury and Abnormalities	Oral cavity carcinoma	2.75e-10	ABCA1,ABCA2,ACAD11,ADAM9,ADD3,ADGRB3,AIFM1,AKAP11,ALK,AMMECR1,AMMECR1L,ANKS1B,ANKZF1,AP2B1,ARHGAP18,ARID2,ARID4B,ARID5B,AS3MT,ASB5,ASPH,ASPN,ATP13A3,ATP6V0A2,ATRNL1,ATXN1,ATXN3,ATXN7L3,BAG1,BAHD1,BAZ2B,BCL2,BDP1,BHLHE22,BMPR1B,BNC2,BRPF3,BTF3L4,C16orf72,C6orf118,CACNA1E,CAMSAP2,CBLL1,CCDC126,CCDC73,CCDC85A,CCDC88A,CCN2,CCN6,CCNJ,CCNL2,CD274,CD46,CDC5L,CDCA2,CELF2,CELSR2,CEP128,CEP250,CEP83,CFAP47…	424
Connective Tissue Development and Function,Tissue Morphology	Quantity of connective tissue	2.89e-10	ABCA1,ABL1,ACTA1,ADD3,ADRB1,AHR,AMACR,ANGPT2,ANGPTL6,ARID3A,ARID4B,ARID5B,ATF2,ATF3,ATM,B4GALNT1,BBS10,BCL2,BUB3,CALCB,CALCR,CAMK4,CAMKK2,CAPNS1,CAV1,CBFA2T3,CBL,CCDC80,CCN2,CCND2,CCND3,CCNG1,CCNY,CD47,CDH11,CDK2,CDK6,CDKN1B,CEBPA,CEBPD,CEP19,CERS6,CIAPIN1,CLEC10A,CLEC4G,CNR1,COPRS,CREB3L2,CRHR2,CRTAP,CSF3,CTNNB1,CTSV,DHFR,DICER1,DKK1,DKK2,DNA2,DNMT3B,DUSP1,E2F3,E2F4,EBF1,EFEMP1,EGFR,EGLN1,EPAS1,…	246
Cellular Assembly and Organization	Formation of cytoskeleton	3.65e-10	ABL1,ABL2,ACTR2,ADGRF5,AKAP11,ARHGAP18,ARHGAP19,ARHGAP32,ARHGAP6,ARHGEF10,ARHGEF12,ARHGEF18,ARHGEF2,ARHGEF3,BAG4,BDKRB2,CALD1,CAMSAP2,CAV1,CAV3,CBL,CCDC88A,CCN2,CD47,CDC14A,CDC25B,CDK6,CDKN1B,CFL1,CLASP1,COBL,CREB1,CRH,CSF3,CTNND1,CTTN,CYRIB,DAAM1,DCX,DLC1,DSTN,EDNRA,EGFR,ERP29,F2RL1,FAM107A,FAM171A1,FBXW7,FER,FGF13,FHDC1,FHIT,FHOD1,FN1,GAP43,GBA2,GDI1,GNA11,GNA13,GNAQ,GNG12,GNG2,GNG5,GRB2,GSN,HC…	163
Cancer,Organismal Injury and Abnormalities,Reproductive System Disease	Malignant neoplasm of male genital organ	3.78e-10	AAK1,AATK,ABCA1,ABCB4,ABCC8,ABCE1,ABHD13,ABL1,ABL2,ACAD8,ACO1,ACOT7,ACP3,ACP5,ACSF2,ACSM1,ACTR1A,ACY3,ADAM10,ADAM17,ADAM7,ADAM9,ADAMTS3,ADAMTS4,ADCY6,ADCY7,ADD3,ADGRA2,ADGRB3,ADGRE1,ADGRE5,ADRA2B,ADRA2C,ADRB1,AGPAT4,AGPAT5,AHRR,AIFM1,AKAP11,AKAP12,ALG11,ALK,ALKBH3,ALS2,AMACR,AMPD3,ANAPC1,ANGPTL1,ANK3,ANKFY1,ANKHD1/ANKHD1-EIF4EBP3,ANKRD27,ANKS1B,ANLN,AOAH,AP2A2,AP3B2,APPL1,AQP8,ARAP2,ARF5,ARFGAP2,…	1225
Cardiovascular Disease,Cardiovascular System Development and Function,Organ Morphology,Organismal Development,Organismal Injury and Abnormalities	Abnormal morphology of heart	3.85e-10	ABCA1,ABCA5,ABCC8,ABL1,ABL2,ACE2,ACKR3,ADAM10,ADAM17,ADAM9,ADK,ADRA2B,ADRA2C,ADRB1,AHR,AIFM1,AKAP12,ANGPT2,APLN,APLNR,ARHGEF12,ARID3A,ATF3,ATXN1,BCL2,BIRC2,BNIP3,CACNA1C,CACNA2D1,CACNB1,CACNB2,CACNB4,CAMK4,CAPNS1,CAV1,CAV3,CCN3,CCND2,CCND3,CCNT1,CCP110,CD2AP,CD69,CDC42EP3,CDK2,CDK5R1,CDK6,CDKN1B,CDKN2C,CIAPIN1,CITED2,CLU,CREB1,CRK,CRKL,CSF3,CSRP3,CTNNB1,CTSB,CTSC,CTSD,CTSV,CXADR,CYP51A1,DCHS1,DDI…	292
Cancer,Gastrointestinal Disease,Organismal Injury and Abnormalities	Oral cancer	3.87e-10	ABCA1,ABCA2,ACAD11,ADAM10,ADAM9,ADD3,ADGRB3,AIFM1,AKAP11,ALK,AMMECR1,AMMECR1L,ANKS1B,ANKZF1,AP2B1,ARHGAP18,ARID2,ARID4B,ARID5B,AS3MT,ASB5,ASPH,ASPN,ATP13A3,ATP6V0A2,ATRNL1,ATXN1,ATXN3,ATXN7L3,BAG1,BAHD1,BAZ2B,BCL2,BDP1,BHLHE22,BMPR1B,BNC2,BRPF3,BTF3L4,C16orf72,C6orf118,CACNA1E,CAMSAP2,CBLL1,CCDC126,CCDC73,CCDC85A,CCDC88A,CCN2,CCN6,CCNJ,CCNL2,CD274,CD46,CDC5L,CDCA2,CELF2,CELSR2,CEP128,CEP250,CEP83…	431
Behavior	Learning	3.94e-10	ABCC8,ABI2,ABL2,ADAM10,ADGRB3,ADGRL2,ADRA2C,ADRB1,AKAP5,AP1S2,ARC,ARF4,ASIC1,ATM,ATP8A1,ATXN1,ATXN1L,ATXN3,BACE1,BCL2,BDNF,BMPR1A,BMPR1B,CACNA1C,CACNA1E,CALB1,CAMK4,CAMKK2,CAPNS1,CBLN2,CCDC88A,CCK,CCND2,CD47,CDK5R1,CEBPA,CEBPD,CERS6,CFL1,CNR1,CREB1,CRH,CRHR2,CRMP1,CSF3,CSK,CTNND2,DDHD2,DFFA,DICER1,DKK1,DLGAP2,DTNBP1,EIF4EBP2,ELAVL4,EPM2A,ESR2,FGF13,FMR1,FXR2,FYN,GABBR1,GABRA5,GAL,GJB6,GMFB,GNAI1,…	188
Organismal Injury and Abnormalities	Hypertrophy	3.94e-10	A4GALT,ABCA1,ABCC8,ABCD2,ABL1,ACE2,ADAM17,ADK,ADRA2C,ADRB1,AHR,ANGPT2,APLN,APLNR,ATF3,ATM,BAG6,BCL2,BCR,BDNF,BMP2,BMPR1A,CACNA1C,CACNA2D1,CACNB2,CAMK4,CAV1,CAV3,CCK,CCNT1,CD2AP,CDKN1B,CREB1,CSF3,CSRP3,CTNNB1,CTSB,CTSC,CTSD,CTSV,DBI,DICER1,DNAJC3,DPF3,DTNBP1,DUSP1,EDNRA,EGFR,EGLN1,EI24,EPAS1,ERBIN,ERG,ESR2,FKBP1A,FOXO1,FOXO3,FST,FUBP1,GAL,GAS2L3,GATA4,GATA6,GDNF,GNA11,GNAQ,GRB2,GSN,GUCY1A1,H2AZ1,H…	188
Cancer,Organismal Injury and Abnormalities	Extraadrenal retroperitoneal tumor	4.22e-10	AAK1,AATK,ABCB10,ABCB4,ABL1,ABRA,ACE2,ACKR3,ACO1,ACOT7,ACOXL,ACSF2,ACSM3,ACSM5,ACSM6,ADAM10,ADAM17,ADAM9,ADAMTS18,ADAMTS3,ADCYAP1R1,ADGRB3,ADGRE1,ADGRL2,ADRA2B,ADRA2C,AEBP2,AFF4,AGL,AGO1,AGPAT5,AHR,AHRR,AJAP1,AJUBA,AKAP11,AKAP5,AKR1C1/AKR1C2,ALK,ALKBH3,ALS2,AMACR,ANKHD1/ANKHD1-EIF4EBP3,ANKRD52,ANKZF1,ANLN,ANP32E,AOC2,AP3B2,AP3S1,AP4E1,APCDD1L,APLNR,APOBEC3A,APPL1,AQP2,AQP7,AQP9,ARAP2,ARFGEF3,ARHG…	1089
Cancer,Organismal Injury and Abnormalities,Reproductive System Disease	Male genital neoplasm	4.28e-10	AAK1,AATK,ABCA1,ABCB4,ABCC8,ABCE1,ABHD13,ABL1,ABL2,ACAD8,ACO1,ACOT7,ACP3,ACP5,ACSF2,ACSM1,ACTR1A,ACY3,ADAM10,ADAM17,ADAM7,ADAM9,ADAMTS3,ADAMTS4,ADCY6,ADCY7,ADD3,ADGRA2,ADGRB3,ADGRE1,ADGRE5,ADRA2B,ADRA2C,ADRB1,AGPAT4,AGPAT5,AHRR,AIFM1,AKAP11,AKAP12,ALG11,ALK,ALKBH3,ALS2,AMACR,AMPD3,ANAPC1,ANGPTL1,ANK3,ANKFY1,ANKHD1/ANKHD1-EIF4EBP3,ANKRD27,ANKS1B,ANLN,AOAH,AP2A2,AP3B2,APPL1,AQP8,ARAP2,ARF5,ARFGAP2,…	1233
Respiratory Disease,Respiratory System Development and Function	Abnormal morphology of respiratory system	4.29e-10	ABCA1,ACVR2B,ADAM17,ADAMTS18,ADGRF5,ADRA2B,AFF4,AKAP12,ASPH,ATF2,ATXN1L,BCL2,BID,CASP9,CAV1,CAV2,CCN2,CDO1,CEBPA,CHL1,CITED2,CLEC1B,COL13A1,CREB1,CRH,CRK,CRKL,DCHS1,DKK1,DLX5,DOCK1,DUSP1,E2F4,EGFR,EGLN3,ELK3,EPAS1,EPHA3,ERRFI1,ESR2,EYA1,F11,FGF10,FGF9,FOXA2,FST,FSTL1,FUBP1,GATA4,GATA6,GSX2,HBEGF,HES1,HEXB,HOXA5,ITGA6,ITGA8,ITGB6,JMJD6,LAMC1,LFNG,LIF,LOX,LOXL1,LPAR1,LPL,LRRC6,MAN1A2,MAN2A1,MAPK8,M…	127
Hereditary Disorder,Neurological Disease,Organismal Injury and Abnormalities	Familial encephalopathy	4.35e-10	AARS1,ABCA1,ABCC8,ABCD2,ACER3,ACO2,ADAM10,ADCY7,ADD3,ADK,ADRA2B,ADRA2C,ADRB1,AFF4,AFG3L2,AGPAT4,AHCYL1,AHI1,AIFM1,ALOX5,ALS2,ANG,ANK3,AP1S2,AP3B2,AP4E1,AP4M1,APLNR,ARHGAP32,ARHGEF2,ARID2,ARL13B,ARL6,ARMC9,ARPP19,ATL1,ATM,ATP5MG,ATP6AP2,ATXN1,ATXN3,B2M,B3GALNT2,B3GNT2,B4GALNT1,B4GAT1,BACE1,BASP1,BBS10,BCL2,BDNF,BEX4,BHLHE40,BIRC2,C12orf4,C19orf12,C4A/C4B,C8orf37,CA1,CA3,CACNA1E,CACNA2D2,CACNB4,CAL…	546
Cellular Assembly and Organization	Organization of cellular membrane	4.48e-10	A4GALT,AAK1,ACTR2,ADAM10,ADGRL2,AGFG1,ANG,ANK3,AP2A2,AP2B1,AP2S1,ARF4,ARPC5,BSN,C1QL3,CADM2,CAMK1,CAV3,CBL,CBLN2,CCDC88A,CD3G,CDH11,CDH7,CFL1,CHP1,CTNNA1,CTNNB1,CTNND1,CTNND2,CTTN,DAB2,DACT1,DHCR24,DKK1,DMPK,EFNB2,EGFR,EPGN,EPHA4,EPN1,EPS15L1,FCHO2,FLRT3,FNBP1,FNBP1L,FZD4,GDNF,GET1,GPM6A,GRB2,HBEGF,IL7R,ITGA8,ITGB1,L1CAM,LMNA,LMX1A,LMX1B,LPIN1,LRP4,LRRC4,MBP,MRTFB,MTOR,MTSS2,NECAP1,NECTIN3,NLGN2,…	117
Cancer,Organismal Injury and Abnormalities,Reproductive System Disease	Female genital tract serous carcinoma	6.36e-10	ABCA8,ACP5,ALK,ANXA8/ANXA8L1,ARID5B,ATM,ATR,AURKA,B2M,BAP1,BCL10,BCL2,BCR,BNC1,C2orf88,C4A/C4B,CACNA1C,CACNB2,CARD16,CCNB1,CD274,CDH11,CDKN1B,CDKN2C,CENPA,CEP43,CHRDL1,CLU,COL4A6,CTNNB1,DAB2,DKK1,DST,DTNA,DYNC1I1,E2F3,EDNRA,EDNRB,EFNA1,EGFR,EPHA3,ERBB3,ERG,ESPL1,ESR2,EXO1,F13A1,F2RL1,FAM171A1,FBXW7,FGF7,FLII,FOXA2,FOXD1,FOXG1,FOXN2,FZD3,GAL,GATA6,GEM,GLI3,GNA13,GPM6A,GUCY1A1,GZMK,HGF,HLF,HOXA11,H…	166
Cellular Assembly and Organization,Tissue Development	Formation of filaments	6.68e-10	ABL1,ABL2,ACTA1,ACTR2,ADGRF5,AKAP11,ARHGAP18,ARHGAP19,ARHGAP32,ARHGAP6,ARHGEF10,ARHGEF12,ARHGEF18,ARHGEF2,ARHGEF3,AURKA,BAG4,BDKRB2,CALD1,CAMSAP2,CAV1,CAV3,CCDC88A,CCN2,CD47,CDC14A,CDC25B,CDK6,CDKN1B,CEP72,CFL1,CLASP1,COBL,CREB1,CRH,CSF3,CTNND1,CTSB,CTTN,CYRIB,DAAM1,DCX,DLC1,DSTN,EDNRA,EGFR,F2RL1,FAM107A,FAM171A1,FBXW7,FER,FGF13,FHDC1,FHIT,FHL1,FHOD1,FN1,GAP43,GBA2,GNA11,GNA13,GNAQ,GNG12,GNG2,GNG…	171
Cell Death and Survival,Organismal Injury and Abnormalities	Necrosis of epithelial tissue	6.99e-10	AAK1,ABL1,ABL2,ADAMTS3,AHR,AIFM1,AIFM3,AMIGO2,ANGPT2,APOBEC3B,ARHGAP18,ATF2,ATF3,ATF7,ATM,ATP1B3,ATXN3,AURKA,BAG1,BAG4,BAK1,BBC3,BCL10,BCL2,BCL2A1,BCL2L10,BCL2L11,BDNF,BID,BIRC2,BNIP3,CA3,CABLES1,CALB1,CALCR,CASP2,CASP9,CAV1,CBL,CCN6,CD151,CD1D,CD274,CDC37,CDK6,CDKN1B,CEBPA,CEBPD,CERS2,CITED2,CLIC4,COL4A2,CSF3,CTNNA1,CTNNB1,CTSB,CYCS,DAB2,DAB2IP,DAP3,DDIT3,DFFA,DICER1,DIP2A,E2F7,EGFR,EMP1,EMP2,EN…	228
Organismal Development	Development of genitourinary system	7.42e-10	ABCA1,ABL1,ACVR1,ACVR2B,ADRA2B,ADRA2C,AFF4,AGFG1,AHR,AKAP12,ALK,APLN,APRT,AQP11,AQP7,AQP8,ARHGEF12,ARID4B,ARID5B,ARL4A,ASZ1,ATAT1,ATM,AURKC,B4GALNT1,BAG6,BAK1,BCAT2,BCL2,BCL2L10,BCL2L11,BDKRB2,BDNF,BIRC2,BMP2,BMP5,BMP6,BNC1,BOLL,BPY2 (includes others),BTRC,C14orf39,CAMK4,CAV1,CBL,CCN2,CCNA1,CCND2,CCNE2,CCNYL1,CDK2,CDK6,CDKN1B,CDKN2C,CDO1,CDX4,CEBPA,CEBPD,CEP57,CHD7,CITED2,CLOCK,CNBD2,CNOT7,CNTD1,…	399
Cell Morphology	Enlargement of cells	7.45e-10	ABCD2,ABL1,ADAM17,ADK,ADRB1,AHR,AIFM1,ANGPT2,ATM,ATP6V0D2,BCL2,BCR,BDNF,BMP2,BMPR1A,CAV1,CAV3,CCK,CDC42SE1,CDC42SE2,CDK5R1,CDKN1B,CENPA,CSF3,CSRP3,CTNNB1,CTSB,CTSC,CTSD,CTTN,DAPK1,DBI,DICER1,DNAJC3,DTNBP1,DUSP1,EFNA5,EGFR,EI24,EMP1,EMP2,EPAS1,EZR,FOXO1,FOXO3,FST,GAL,GAS2L3,GATA4,GATA6,GDNF,GNAQ,GRIN2B,H2AZ1,HAND2,HBEGF,HCK,HES1,HPRT1,HTR2B,HTR2C,IL6R,IL6ST,INHBA,JUN,KCND2,KLF4,LEP,LEPR,LIF,LPAR1,…	139
Cellular Development,Cellular Growth and Proliferation	Colony formation of cells	7.73e-10	ABL1,ACKR3,ADAM17,AHR,AIFM1,AKAP12,ALK,ALKAL2,APOBEC3B,ARHGAP32,ATF1,ATF2,ATF3,ATR,BACH2,BAG1,BCL2,BCL2L11,BPIFA1,CABLES1,CASP9,CAV1,CBL,CBX2,CCL3,CCNG2,CDK3,CDKN1B,CDX4,CKS2,CLU,CNDP2,CNKSR1,CNOT7,CRK,CRKL,CSF3,CTNNB1,CTSB,CTSD,DDIT3,DDX43,DDX5,DICER1,DLC1,DOCK4,DUSP1,E2F3,E2F5,EGFR,EI24,ENTPD5,EPAS1,EPB41L3,EPHA2,ERBB3,ERRFI1,ESR2,ETS1,EZR,FGF9,FN1,FOXA2,FOXO3,FOXO4,FRMD6,FRS2,GDNF,GHRHR,GNA13,…	218
Cancer,Organismal Injury and Abnormalities,Reproductive System Disease	Prostatic tumor	8.36e-10	AAK1,AATK,ABCA1,ABCB4,ABCC8,ABCE1,ABHD13,ABL1,ABL2,ACAD8,ACO1,ACOT7,ACP3,ACP5,ACSF2,ACSM1,ACTR1A,ACY3,ADAM10,ADAM17,ADAM7,ADAM9,ADAMTS3,ADAMTS4,ADCY6,ADCY7,ADD3,ADGRA2,ADGRB3,ADGRE1,ADGRE5,ADRA2B,ADRA2C,ADRB1,AGPAT4,AGPAT5,AHRR,AIFM1,AKAP11,AKAP12,ALG11,ALK,ALKBH3,ALS2,AMACR,AMPD3,ANAPC1,ANGPTL1,ANK3,ANKFY1,ANKHD1/ANKHD1-EIF4EBP3,ANKRD27,ANKS1B,ANLN,AOAH,AP2A2,AP3B2,APPL1,AQP8,ARAP2,ARF5,ARFGAP2,…	1215
Cancer,Organismal Injury and Abnormalities,Respiratory Disease	Respiratory system tumor	9.89e-10	A4GNT,ABCA5,ABCA8,ABCB10,ABCB4,ABL1,ABL2,ABRAXAS2,ACE2,ACKR3,ACP5,ADAM10,ADAM17,ADAM9,ADAMTS3,ADCYAP1R1,ADGRB3,ADGRE5,ADGRL2,ADIPOR2,AEN,AGFG2,AGO1,AHI1,AHR,AIFM1,AIPL1,AJAP1,AJUBA,AKAP12,ALCAM,ALDH8A1,ALK,ALOX5,AMACR,ANAPC1,ANGPTL1,ANK3,ANKRD50,AOAH,AP3S1,APLN,APOBEC3B,AQP10,AQP8,ARAP2,ARFGAP2,ARFGEF3,ARHGAP6,ARHGEF12,ARID2,ARID4B,ARID5B,ARMCX1,ASB11,ASZ1,ATAD2,ATF2,ATF3,ATF7IP,ATM,ATP10B,ATP1B3…	1007
Cardiovascular Disease,Organismal Injury and Abnormalities	Abnormality of atrium	1.01e-09	ABCA5,ABL1,ACKR3,ADAM17,ADAM9,ADRA2B,BIRC2,CAV3,CDK2,CDKN1B,CITED2,CRKL,CTNNB1,CTSV,CXADR,CYP51A1,DCHS1,DTNA,EDNRA,EFNA1,EGLN1,EPHA3,ERBB3,F11,FGF9,FKBP1A,FOXC2,GABRA2,GABRA3,GABRA5,GABRA6,GABRB1,GABRB2,GABRE,GABRP,HAND2,HBEGF,HDAC7,HTR2B,ISL1,KIDINS220,MBNL1,MBNL2,MEF2C,MYH10,NTF3,PDE4D,PDE7A,PDE7B,PITX2,PKP2,RUNX2,SIRT1,SLC6A6,SRSF10,TBX1,TBX5,TGFB2,TH,TLL1,TNS1,TTN,UBR1,VEGFA,ZFPM2	65
Cellular Growth and Proliferation	Colony formation	1.05e-09	ABL1,ACKR3,ADAM17,AHR,AIFM1,AKAP12,ALK,ALKAL2,APOBEC3B,ARHGAP32,ATF1,ATF2,ATF3,ATM,ATR,BACH2,BAG1,BBC3,BCL2,BCL2L11,BPIFA1,CABLES1,CASP9,CAV1,CBL,CBX2,CCL3,CCNB1,CCNG2,CDC25B,CDK2,CDK3,CDKN1B,CDX4,CKS2,CLU,CNDP2,CNKSR1,CNOT7,CRK,CRKL,CSF3,CTNNB1,CTSB,CTSD,DDIT3,DDX43,DDX5,DICER1,DLC1,DOCK4,DUSP1,E2F3,E2F5,EGFR,EI24,ENTPD5,EPAS1,EPB41L3,EPHA2,ERBB3,ERRFI1,ESR2,ETS1,EZR,FGF9,FN1,FOXA2,FOXO3,FOXO4,F…	233
Cell Death and Survival	Cell death of blood cells	1.08e-09	ABCG1,ABL1,ADAM17,ADRB1,AHR,AIFM1,AKTIP,ANGPT2,ANKZF1,ARID5B,ATF2,ATF3,ATF7,ATM,AURKB,BAG1,BAG2,BAK1,BBC3,BCL10,BCL2,BCL2A1,BCL2L11,BID,BIRC2,BLK,BLNK,BMP2,BTLA,CAMK4,CASP2,CASP9,CAV1,CBL,CCL3,CCND2,CCR8,CD1D,CD226,CD274,CD28,CD300A,CD47,CD69,CD70,CD80,CDK2,CDKN1B,CEBPA,CLOCK,CLU,CNR1,CNR2,CREB1,CRKL,CSF3,CTNNB1,CTSB,CTSD,CXCL1,CXCL2,DAPK1,DDIT3,DEK,DFFA,DICER1,DNMT3B,E2F4,EBF1,EDNRB,EFNA1,EGFR,E…	256
Cellular Development,Cellular Growth and Proliferation,Organ Development,Skeletal and Muscular System Development and Function,Tissue Development	Proliferation of muscle cells	1.23e-09	ACE2,ADAM10,ADAM17,ANG,ATOH8,BDNF,BMP2,BMPR1A,CAV1,CBL,CCL3,CCN3,CCN4,CDK2,CDK6,CDKN1B,CEBPD,CENPX,CITED2,CRHR2,CSF3,CSRP3,CTNNB1,CTSB,CX3CL1,CXADR,DNAJB6,DUSP1,E2F3,EDNRA,EFNB2,EGFR,EPHA2,ESR2,FAT1,FGF9,FHL1,FOXF2,FOXO1,FOXP1,GAS2L3,GATA4,GATA6,GNAQ,H2AZ1,HAND2,HAS2,HBEGF,HDAC7,HEYL,HGF,HMGA2,HOPX,HTR2B,IGF1R,IL12B,IL17A,IL17F,IL1A,IL22,IL6R,IL6ST,INHBA,IRS1,ITGA6,ITGB1,JUN,KALRN,KCNK2,KLF4,KLF5…	138
Cancer,Organismal Injury and Abnormalities	Lymphatic system tumor	1.25e-09	ABAT,ABCG1,ABL1,ABL2,ABRAXAS2,ACAD11,ACP5,ACSM6,ADAM7,ADAM9,ADD3,ADGRA2,ADGRB3,ADGRF5,ADGRL2,ADRB1,AGBL4,AGL,AHR,AKAP11,AKAP5,ALK,ALOX5,AMACR,ANGPT2,ANK3,ANKIB1,ANKRD36,ANKRD50,APOBEC3A,APOBEC3B,ARHGAP17,ARHGEF3,ARID2,ARID5B,ARMC9,ATF2,ATF3,ATF7,ATF7IP,ATM,ATP6V0D2,ATR,ATRNL1,ATXN1,ATXN3,ATXN7L1,AURKA,AURKB,B2M,BACH2,BAG2,BAK1,BAP1,BASP1,BAZ2B,BBC3,BCL10,BCL2,BCL2L10,BCL2L11,BCL2L13,BCR,BDNF,BLNK…	693
Developmental Disorder,Neurological Disease	Congenital neurological disorder	1.27e-09	ABCD2,ADAM10,ADAMTS8,ADCY6,ADRA2B,ADRA2C,ADRB1,AFF4,AHI1,ALG2,ALOX5,ANGPT2,APBB2,ARHGEF2,ARID2,ARL13B,ARL6,ARMC9,ASCC1,ATM,ATP2C1,B3GALNT2,B4GAT1,BACE1,BAG6,BBS10,BCL10,BDNF,BHLHE22,BSN,C8orf37,CA1,CACNA2D2,CASP9,CAV1,CC2D2A,CCDC47,CCDC88C,CCN2,CCND2,CCR9,CD96,CDH11,CDK13,CDK20,CEP120,CEP19,CEP41,CFL1,CHD7,CHMP1A,CITED2,CLN5,CLP1,CLU,CNN3,COL13A1,COL25A1,COL4A2,CTNNA2,CTNNB1,CTSD,DACT1,DCX,DDC,DD…	320
Cardiovascular System Development and Function,Organ Morphology,Organismal Development	Morphology of heart	1.27e-09	ABCA1,ABCA5,ABCC8,ABL1,ABL2,ACE2,ACKR3,ADAM10,ADAM17,ADAM9,ADK,ADRA2B,ADRA2C,ADRB1,AHR,AIFM1,AKAP12,AKAP5,ANGPT2,APLN,APLNR,ARHGEF12,ARID3A,ATF3,ATXN1,BCL2,BIRC2,BMPR1A,BNIP3,CACNA1C,CACNA2D1,CACNB1,CACNB2,CACNB4,CAMK4,CAPNS1,CASP9,CAV1,CAV3,CCN3,CCND2,CCND3,CCNT1,CCP110,CD2AP,CD69,CDC42EP3,CDK2,CDK5R1,CDK6,CDKN1B,CDKN2C,CIAPIN1,CITED2,CLU,CNMD,CREB1,CRK,CRKL,CSF3,CSRP3,CTNNB1,CTSB,CTSC,CTSD,CTSV…	309
Cancer,Hematological Disease,Immunological Disease,Organismal Injury and Abnormalities	Tumorigenesis of lymphocytes	1.33e-09	ABAT,ABCG1,ABL1,ABL2,ABRAXAS2,ACAD11,ACP5,ADAM7,ADAM9,ADD3,ADGRA2,ADGRB3,ADGRF5,ADGRL2,ADRB1,AGBL4,AGL,AHR,AKAP11,AKAP5,ALK,ALOX5,AMACR,ANGPT2,ANKIB1,ANKRD36,ANKRD50,APOBEC3A,APOBEC3B,ARHGAP17,ARHGEF3,ARID2,ARID5B,ARMC9,ATF2,ATF3,ATF7,ATF7IP,ATM,ATP6V0D2,ATR,ATRNL1,ATXN1,ATXN3,ATXN7L1,AURKA,AURKB,B2M,BACH2,BAG2,BAK1,BAP1,BASP1,BAZ2B,BBC3,BCL10,BCL2,BCL2L10,BCL2L11,BCL2L13,BDNF,BLNK,BNC2,BOD1L1,BR…	646
Cellular Movement	Migration of tumor cell lines	1.37e-09	ACKR3,ACVR1,ADAM10,ADAM17,ADAM9,ADGRE5,ADGRF5,AHR,AKAP11,AKAP12,ALCAM,ANGPT2,AQP5,AQP8,ARHGAP21,ARRDC3,ASIC1,ASPH,ATF3,ATOX1,AURKA,B4GAT1,BAG1,BCL10,BDNF,BHLHE41,BMP2,BMP6,CALD1,CALU,CAMKK2,CAPNS1,CAV1,CCDC88A,CCL22,CCL3,CCL7,CCN2,CCN3,CCN4,CCNH,CD151,CD47,CDC25B,CDH11,CDKN1B,CDKN3,CEBPA,CEBPD,CERS6,CKLF,CLU,CNDP2,CNR2,CPNE3,CRK,CRKL,CRMP1,CRY1,CSF3,CSK,CTBP2,CTDSP1,CTNNB1,CTNND1,CTSB,CTTN,CX3CL1…	365
Cancer,Organismal Injury and Abnormalities	Benign Tumors	1.37e-09	ABCA1,ABCA8,ABI2,ABL1,ACKR3,ACSF2,ADCYAP1R1,ADGRB3,ADGRE5,ADRA2B,ADRA2C,ADRB1,AHCYL1,AHR,AJUBA,ALCAM,ANGPT2,ANGPTL1,ANKIB1,AP2S1,AQP8,ARHGEF2,ARL4D,ASB5,ATF2,ATM,ATP2C1,ATR,ATRNL1,AURKB,BACE2,BAK1,BAP1,BBC3,BCL10,BCL2,BCL2L11,BDNF,BID,BMP5,BTRC,C10orf105,C2orf88,CA1,CACNB2,CAV1,CAVIN2,CBL,CCDC80,CCK,CCNB1,CCNC,CCND2,CCND3,CCNE2,CDC42EP3,CDK2,CDKN1B,CDKN2C,CEACAM6,CEACAM7,CEBPD,CFAP20DC,CLCN5,CLU,…	333
Behavior	Locomotion	1.42e-09	ABAT,ABCA1,ABCA2,ABCD2,ABL2,AFG3L2,AHI1,ALK,ALS2,ANK3,APBA2,ARCN1,ATXN1,ATXN3,BACE1,BAG1,BDNF,BHLHE22,BVES,CACNA1C,CACNA1E,CACNB4,CALB1,CAMK4,CANX,CAV1,CCND2,CFL2,CHD7,CHL1,CIART,CLCN3,CNR1,CRH,DAB1,DDHD2,DIO3,DNAJC5,DSCAM,DUSP1,EBF1,EGR3,ELAVL4,EPHA4,EPS8,FGF14,FMR1,FOXA2,FOXO1,FZD4,GABBR1,GABRA3,GAD2,GALP,GDNF,GMFB,GRIA1,GRID2,GRM1,GRM5,HEXB,HMGB1,HOMER1,HOMER2,HOXD10,HPRT1,HTR1B,HTR2A,HTR2B,HT…	154
Skeletal and Muscular System Development and Function	Morphology of muscle	1.46e-09	ABL1,ACTA1,ACVR2B,ADAM17,ADK,ADRB1,AHR,AKAP5,ALS2,ANGPT2,ARID3A,BACE1,BACH1,BCL2,BDKRB2,BDNF,CACNB1,CASP9,CAV1,CAV2,CAV3,CD47,CDK2,CDKN1B,CFL2,CHRM5,CLU,COL13A1,COL25A1,CRK,CSF3,CSRP3,CTNNB1,CTSV,CXADR,DICER1,DLX5,DMPK,DNAJC5,DOCK1,DTNA,DTNBP1,DUSP1,EDNRA,EFEMP1,EGFR,EGLN1,EGR3,ERBB3,ESR2,EYA1,FGF10,FKBP1A,FN1,FOXC2,FOXO1,FOXO3,FST,FXR1,FZD4,GAS2L3,GATA4,GATA6,GNAQ,GPCPD1,GRB10,H2AZ1,HAND2,HBEGF,…	210
Cancer,Organismal Injury and Abnormalities	Head and neck squamous cell carcinoma	1.5e-09	ABCA1,ABCA2,ABCB4,ABCG1,ABL2,ACAD11,ACO2,ACOXL,ACSM6,ADAM17,ADAM9,ADAMTS18,ADD3,ADGRB3,ADGRE5,AGAP5 (includes others),AHI1,AIFM1,AJUBA,AKAP11,AKAP12,AKNAD1,ALK,ALOX5,AMMECR1,AMMECR1L,ANKRD36,ANKRD50,ANKRD52,ANKS1B,ANKZF1,ANLN,AP2B1,AQP2,ARC,ARFGEF3,ARHGAP18,ARHGAP6,ARID2,ARID4B,ARID5B,ARIH1,AS3MT,ASB5,ASPH,ASPN,ASZ1,ATAD2,ATAT1,ATF2,ATM,ATP13A3,ATP6V0A2,ATR,ATRNL1,ATXN1,ATXN3,ATXN7L3,AURKA,AURKC,…	835
Cancer,Organismal Injury and Abnormalities,Reproductive System Disease	Prostate cancer	1.52e-09	AAK1,AATK,ABCA1,ABCB4,ABCC8,ABCE1,ABHD13,ABL1,ABL2,ACAD8,ACO1,ACOT7,ACP3,ACP5,ACSF2,ACSM1,ACTR1A,ACY3,ADAM10,ADAM17,ADAM7,ADAM9,ADAMTS3,ADAMTS4,ADCY6,ADCY7,ADD3,ADGRA2,ADGRB3,ADGRE1,ADGRE5,ADRA2B,ADRA2C,ADRB1,AGPAT4,AGPAT5,AHRR,AIFM1,AKAP11,AKAP12,ALG11,ALK,ALKBH3,ALS2,AMACR,AMPD3,ANAPC1,ANGPTL1,ANK3,ANKFY1,ANKHD1/ANKHD1-EIF4EBP3,ANKRD27,ANKS1B,ANLN,AOAH,AP2A2,AP3B2,APPL1,AQP8,ARAP2,ARF5,ARFGAP2,…	1207
Cardiovascular Disease,Organismal Injury and Abnormalities	Abnormality of heart ventricle	1.62e-09	ABCA1,ABCC8,ABL1,ACE2,ACKR3,ADAM17,ADAM9,ADRA2B,ADRA2C,ADRB1,ANGPT2,ATP2C1,BCL2,BNIP3,CA1,CA3,CACNA1C,CACNA2D1,CACNB2,CAPNS1,CAV1,CAV3,CBL,CCN3,CCND2,CCND3,CCNE2,CDK2,CDK6,CITED2,CLU,CNMD,CNR2,CRK,CRKL,CSRP3,CTNNB1,CTSV,CXADR,DCHS1,DICER1,DIO3,DIP2A,DOCK1,DSG2,DTNA,EDNRA,EFNA1,EGFR,EGLN1,EPAS1,EPN1,ERBB3,ERG,ESR2,FGF9,FKBP1A,FOXO1,FSTL1,GABRA2,GABRA3,GABRA5,GABRA6,GABRB1,GABRB2,GABRE,GABRP,GAS2L3…	170
Cellular Development,Embryonic Development,Organismal Development	Differentiation of embryonic cells	1.68e-09	ACVR1,AIFM1,AJUBA,APLN,APLNR,BDNF,BHLHE41,BMP2,BMP3,BMP5,CBL,CDKN1B,CDX4,CITED2,CMTM7,COL4A2,CSF3,CTNNB1,DAB2,DKK1,DNMT3B,E2F7,EOMES,EXT1,FGF4,FN1,FOXC1,GATA4,GATA6,GDNF,GLI3,GNA13,GNL3,GNPNAT1,GRB2,HBEGF,HECTD1,HEYL,HGF,HMGA2,HOPX,HTR2B,IFNW1,INHBA,ISL1,ITGA6,ITGA8,ITGAV,ITGB1,ITGB2,JUN,KITLG,L1CAM,LAMTOR3,LEP,LIF,LIMS1,LMNA,LMX1A,LRP6,MAP3K4,MAPK1,MAPK8,MAPK9,MEF2C,MET,MIXL1,MMP9,MNX1,MTOR,NFYA…	106
Organismal Development,Organismal Injury and Abnormalities	Abnormal morphology of abdomen	1.93e-09	A4GNT,ABCA1,ABCA5,ABCB10,ABCB4,ABCD2,ABL1,ABL2,ACE2,ACP3,ACVR2B,ADAM17,ADAMTS3,AGL,AHR,AKAP11,AKAP12,AKAP5,ALOX5,AMACR,AOAH,APRT,AQP11,ARFGEF3,ARID4B,ARID5B,ATF2,ATF3,ATF7,ATM,B2M,B3GNT5,BAG6,BAK1,BBC3,BBS10,BCAT2,BCL2,BCL2L11,BCR,BDKRB2,BDNF,BHLHE40,BID,BLNK,BMPR1B,C4A/C4B,CABLES1,CACNA2D1,CAMK4,CASP2,CAV1,CBFA2T3,CBL,CBX2,CCL28,CCN3,CCNG1,CCR9,CD151,CD1D,CD28,CD2AP,CD47,CD80,CDC25B,CDK2,CDK6,CD…	367
Cardiovascular Disease,Cardiovascular System Development and Function,Organ Morphology,Organismal Development,Organismal Injury and Abnormalities	Hypertrophy of heart	2e-09	ABCA1,ABCC8,ACE2,ADAM17,ADK,ADRA2C,ADRB1,AHR,ANGPT2,APLN,APLNR,ATF3,BCL2,CACNA1C,CACNA2D1,CACNB2,CAMK4,CAV1,CAV3,CCNT1,CREB1,CSF3,CSRP3,CTNNB1,CTSB,CTSC,CTSD,CTSV,DICER1,DNAJC3,DPF3,DTNBP1,DUSP1,EGFR,EGLN1,EPAS1,ERBIN,ERG,ESR2,FKBP1A,FOXO1,FOXO3,FUBP1,GAL,GAS2L3,GATA4,GATA6,GNA11,GNAQ,GRB2,GSN,GUCY1A1,H2AZ1,HAND2,HBEGF,HCK,HDC,HEXIM1,HOPX,HPRT1,HTR2B,HTR2C,IL6R,IL6ST,INHBA,JUN,KCND2,KCNE2,KCNJ11,…	139
Cardiovascular System Development and Function	Morphology of cardiovascular system	2.05e-09	ABCA1,ABCA5,ABCC8,ABL1,ABL2,ACE2,ACKR3,ADAM10,ADAM17,ADAM9,ADGRA2,ADK,ADRA2B,ADRA2C,ADRB1,AHR,AIFM1,AKAP12,AKAP5,ANGPT2,APLN,APLNR,ARHGEF12,ARID3A,ARID4B,ATF3,ATXN1,BACH1,BCL2,BDKRB2,BIRC2,BMP2,BMPR1A,BNIP3,CACNA1C,CACNA2D1,CACNB1,CACNB2,CACNB4,CAMK4,CAPNS1,CASP9,CAV1,CAV3,CCN3,CCND2,CCND3,CCNE2,CCNT1,CCP110,CD151,CD2AP,CD69,CDC42EP3,CDK2,CDK5R1,CDK6,CDKN1B,CDKN2C,CDO1,CIAPIN1,CITED2,CLEC1B,CLIC4…	360
Respiratory System Development and Function	Respiratory system development	2.08e-09	ABCA1,ACE2,ACVR1,ACVR2B,ADAM17,ADAMTS18,ADGRF5,ADRA2B,AFF4,AKAP12,ATF2,ATXN1,ATXN1L,BAG6,BID,BMP2,BMP5,BMPR1A,CAV1,CAV2,CCN2,CDH11,CEBPA,CHD7,CITED2,CLEC1B,CNOT9,CREB1,CRH,CRK,CTNNB1,DCHS1,DICER1,DLX5,DUSP1,EBF3,EGFR,ELK3,EPAS1,EPHA3,ERRFI1,ESR2,EYA1,F11,FBXW7,FGF10,FGF7,FGF9,FOXA1,FOXA2,FOXF1,FOXG1,FOXP1,FOXP2,FRS2,FSTL1,FUBP1,GATA4,GATA6,GLI3,GPC3,GREM1,GRHL2,HBEGF,HES1,HIKESHI,HOPX,HOXA1,HOXA5…	149
Cancer,Hematological Disease,Organismal Injury and Abnormalities	Mature lymphocytic neoplasm	2.17e-09	ABCG1,ABL1,ACAD11,ACP5,ACSM6,ADAM7,ADAM9,ADGRB3,ADGRF5,ADGRL2,ADRB1,AGBL4,AGL,AHR,AKAP11,AKAP5,ALK,ALOX5,AMACR,ANGPT2,ANKIB1,ANKRD36,ANKRD50,APOBEC3A,APOBEC3B,ARHGAP17,ARHGEF3,ARID2,ARMC9,ATF3,ATM,ATP6V0D2,ATR,ATRNL1,ATXN1,ATXN3,ATXN7L1,AURKA,B2M,BACH2,BAK1,BASP1,BAZ2B,BBC3,BCL10,BCL2,BCL2L10,BCL2L11,BCL2L13,BDNF,BNC2,BOD1L1,BRD3,BTG1,C1QTNF7,C5orf22,CALD1,CASP2,CASP9,CAV1,CAV2,CAV3,CAVIN2,CBFA2T…	558
Cancer,Organismal Injury and Abnormalities	Benign solid tumor	2.37e-09	ABCA1,ABCA8,ABI2,ABL1,ACKR3,ACSF2,ADCYAP1R1,ADGRB3,ADGRE5,ADRA2B,ADRA2C,ADRB1,AHCYL1,AHR,AJUBA,ALCAM,ANGPT2,ANGPTL1,ANKIB1,AP2S1,AQP8,ARHGEF2,ARL4D,ASB5,ATF2,ATM,ATP2C1,ATR,ATRNL1,AURKB,BACE2,BAK1,BAP1,BBC3,BCL10,BCL2,BCL2L11,BDNF,BID,BMP5,BTRC,C10orf105,C2orf88,CA1,CACNB2,CAV1,CAVIN2,CBL,CCDC80,CCK,CCNB1,CCNC,CCND2,CCND3,CCNE2,CDC42EP3,CDK2,CDKN1B,CDKN2C,CEACAM6,CEACAM7,CEBPD,CFAP20DC,CLCN5,CLU,…	329
Cancer,Organismal Injury and Abnormalities	Lymphoid cancer	2.51e-09	ABAT,ABCG1,ABL1,ABL2,ABRAXAS2,ACAD11,ACP5,ACSM6,ADAM7,ADAM9,ADD3,ADGRA2,ADGRB3,ADGRF5,ADGRL2,ADRB1,AGBL4,AGL,AHR,AKAP11,AKAP5,ALK,ALOX5,AMACR,ANGPT2,ANK3,ANKIB1,ANKRD36,ANKRD50,APOBEC3A,APOBEC3B,ARHGAP17,ARHGEF3,ARID2,ARID5B,ARMC9,ATF2,ATF3,ATF7,ATF7IP,ATM,ATP6V0D2,ATR,ATRNL1,ATXN1,ATXN3,ATXN7L1,AURKA,AURKB,B2M,BACH2,BAG2,BAK1,BAP1,BASP1,BAZ2B,BBC3,BCL10,BCL2,BCL2L10,BCL2L11,BCL2L13,BCR,BDNF,BLNK…	682
Cancer,Organismal Injury and Abnormalities	Growth of tumor	2.84e-09	A4GNT,ABL1,ACKR3,ADAM10,ADAM9,AGPS,AHR,AJUBA,ALCAM,ALK,ALOX5,ANG,ANGPT2,ARL13B,ARRDC3,ASIC1,ATF2,ATM,ATP6V0A2,AURKA,B4GALNT1,BAG1,BBC3,BCL2,BCL2L13,BDKRB2,BDNF,BIRC2,BMP6,BNIP3,CASP2,CASP9,CAV1,CCDC88A,CCL3,CCN2,CCN4,CCNA1,CCND3,CD160,CD226,CD274,CD28,CD70,CD80,CDK6,CDKN1B,CERS6,CISD1,CLEC4G,CLU,CNKSR1,CNR1,COX17,CRKL,CSF3,CTNNB1,CTNND1,CTSB,CTSV,CTTN,CUEDC2,CUZD1,CXCL9,CYP3A5,DAB2IP,DDIT3,DDX11,…	327
Cellular Development,Tissue Development	Differentiation of epithelial tissue	3.01e-09	ABL1,ABL2,ACVR2B,ADAM17,ADAM9,AKR1C1/AKR1C2,ARHGAP19,ATOH8,AURKB,BCL2,BCR,BHLHE41,BLOC1S6,BMP2,BMP6,BTG1,CAV1,CDC25B,CDK2,CDKN1B,CEBPA,CERS3,CLIC4,CNN3,COMMD5,CRHR2,CSTA,CTNNB1,CTNND1,CTSB,CTSV,DLX3,DLX5,DSG4,E2F7,EDNRB,EGFR,EOMES,EPHA2,ERRFI1,ESR2,FBXW7,FGF10,FGF4,FGF7,FGF9,FN1,FOXA1,FOXA2,FOXC1,FYN,FZD1,GAB1,GATA4,GATA6,GLI3,GNA11,GNAQ,GRHL2,HES1,HOXB5,IGF1R,IL24,IRF6,ITGA6,ITGB1,IVL,KDR,KEAP1,…	154
Cell Signaling	Activation of enzyme	3.19e-09	ABCA1,ACER2,ADAM9,ADCY6,ADCY7,ADCYAP1R1,ADRA2B,ADRB1,AIFM1,AKAP12,AKAP5,ALK,ALS2,ANG,ANP32B,ARHGAP6,AVPI1,BAK1,BBC3,BCL10,BCL2,BCL2L10,BCL2L11,BID,BMP2,CACUL1,CALCB,CALCR,CAMK2N1,CAP2,CASP9,CAV1,CAV3,CCK,CDC25B,CDK5R1,CDK5R2,CDKN1B,CDKN2C,CEBPA,CEP43,CHP1,COPS5,CRHR2,CRK,CRKL,CXCL11,CXCL9,CYCS,DAB1,DAB2,DAB2IP,DAOA,DAP,DGKG,DGKH,DLC1,DNAJC3,EDNRA,EDNRB,EGFR,EGLN3,EPGN,ERN1,ERP29,F2RL1,FAM162A,FGF…	176
Embryonic Development,Nervous System Development and Function,Organ Development,Organismal Development,Tissue Development	Development of cerebral cortex	3.24e-09	ACVR1,ADAM10,ADCYAP1R1,ADGRA2,ALK,ATAT1,BDNF,BMPR1A,BTBD3,CCDC85C,CDK5R1,CDK5R2,CDK6,CEP120,CHL1,CNR1,CREB1,CRK,CRKL,CTNNB1,CXADR,DAB1,DCX,DICER1,FGF13,FOXC1,FOXG1,FOXP2,FYN,GAP43,GLI3,GRM1,GRM5,GSX2,ID4,KIF14,L1CAM,L2HGDH,LAMC1,LHX2,LMX1A,LRP6,MCPH1,NANOS1,NEUROD1,NFIB,NOG,NR4A3,OGDH,OTX2,PAFAH1B1,PAK1,PAX5,PAX6,POU3F3,PRDM16,PTEN,RAB17,RAC1,RELN,RHOA,ROBO2,SEMA3F,SLC1A2,SMAD4,SOX2,SRC,TBR1,TFAP…	78
Hematological Disease,Immunological Disease	Lymphoproliferative disorder	3.51e-09	ABAT,ABCG1,ABL1,ABL2,ABRAXAS2,ACAD11,ACP5,ACSM6,ADAM7,ADAM9,ADD3,ADGRA2,ADGRB3,ADGRF5,ADGRL2,ADRB1,AGBL4,AGL,AHR,AKAP11,AKAP5,ALK,ALOX5,AMACR,ANGPT2,ANK3,ANKIB1,ANKRD36,ANKRD50,APOBEC3A,APOBEC3B,ARHGAP17,ARHGEF3,ARID2,ARID5B,ARMC9,ATF2,ATF3,ATF7,ATF7IP,ATM,ATP6V0D2,ATR,ATRNL1,ATXN1,ATXN3,ATXN7L1,AURKA,AURKB,B2M,BACH2,BAG2,BAK1,BAP1,BASP1,BAZ2B,BBC3,BCL10,BCL2,BCL2L10,BCL2L11,BCL2L13,BCR,BDNF,BLNK…	676
Cancer,Gastrointestinal Disease,Organismal Injury and Abnormalities	Oral squamous cell carcinoma	3.79e-09	ABCA1,ABCA2,ACAD11,ADAM9,ADD3,ADGRB3,AIFM1,AKAP11,ALK,AMMECR1,AMMECR1L,ANKS1B,ANKZF1,AP2B1,ARHGAP18,ARID4B,ARID5B,AS3MT,ASB5,ASPH,ASPN,ATP13A3,ATP6V0A2,ATRNL1,ATXN1,ATXN3,ATXN7L3,BAG1,BAHD1,BAZ2B,BCL2,BDP1,BHLHE22,BMPR1B,BNC2,BRPF3,BTF3L4,C16orf72,C6orf118,CACNA1E,CAMSAP2,CBLL1,CCDC126,CCDC73,CCDC88A,CCN2,CCN6,CCNJ,CCNL2,CD274,CD46,CDC5L,CDCA2,CELF2,CELSR2,CEP128,CEP250,CEP83,CFAP47,CFL2,CHD7,CIT…	403
Cellular Development,Embryonic Development,Organismal Development,Tissue Development	Differentiation of embryonic tissue	3.84e-09	ACVR1,AJUBA,APLN,BDNF,BMP2,BMP3,BMP5,BMP6,CASP9,CBL,CDKN1B,CITED2,CMTM7,COL4A2,CTNNB1,DAB2,DKK1,DNMT3B,E2F7,EOMES,ERBB3,EXT1,FBXW7,FGF4,FMR1,FN1,FOXA2,FOXC1,FOXO3,GAB2,GATA4,GATA6,GDNF,GNA13,GRB2,HBEGF,HECTD1,HES1,HEYL,HGF,HMGA2,HOPX,HTR2B,IFNW1,INHBA,ISL1,ITGA6,ITGA8,ITGAV,ITGB1,ITGB2,JUN,KITLG,LAMTOR3,LEP,LIF,LIMS1,LMNA,LRP6,MAP3K4,MAPK1,MAPK8,MAPK9,MEF2C,MEOX1,MEOX2,MET,MIB1,MIXL1,MMP9,MTOR,MY…	109
Cellular Movement	Invasion of breast cancer cell lines	3.9e-09	ABL1,ABL2,AHR,ARRDC3,BARX2,BBC3,BHLHE41,BMP2,BMP6,CAV1,CBL,CCDC88A,CCN6,CCNH,CDKN1B,CEBPD,CNR1,CRTAP,CST4,CTBP2,CTDSP1,CTNNB1,CTNND1,CTSB,CTTN,DGKA,DIAPH2,DNAJB6,EED,EFEMP1,EIF3A,EMP1,ENAH,ENTPD5,ERBB3,ESR2,EZR,FHOD1,FN1,FNBP1L,FOXA1,FOXC1,FOXC2,FOXF2,FOXP3,FSIP1,FXYD5,GAB2,GOLPH3,HAS2,HBP1,HEXIM1,HGF,HMG20A,HMGA2,HSP90AA1,IL17A,IRS1,IRS2,ITGB1,JUN,KEAP1,KLF6,LASP1,LCK,LEP,LOX,MAP2K7,MAP3K21,MAPK…	136
Cancer,Hematological Disease,Immunological Disease,Organismal Injury and Abnormalities	Lymphocytic cancer	4.03e-09	ABAT,ABCG1,ABL1,ABL2,ABRAXAS2,ACAD11,ACP5,ACSM6,ADAM7,ADAM9,ADD3,ADGRA2,ADGRB3,ADGRF5,ADGRL2,ADRB1,AGBL4,AGL,AHR,AKAP11,AKAP5,ALK,ALOX5,AMACR,ANGPT2,ANK3,ANKIB1,ANKRD36,ANKRD50,APOBEC3A,APOBEC3B,ARHGAP17,ARHGEF3,ARID2,ARID5B,ARMC9,ATF2,ATF3,ATF7,ATF7IP,ATM,ATP6V0D2,ATR,ATRNL1,ATXN1,ATXN3,ATXN7L1,AURKA,AURKB,B2M,BACH2,BAG2,BAK1,BAP1,BASP1,BAZ2B,BBC3,BCL10,BCL2,BCL2L10,BCL2L11,BCL2L13,BCR,BDNF,BLNK…	673
Embryonic Development,Nervous System Development and Function,Organ Development,Organismal Development,Tissue Development	Formation of rhombencephalon	4.11e-09	ABL1,ABL2,AHI1,ATXN1,BCL2,BCR,BDNF,BMP5,CCND2,CDK5R1,CDK5R2,CLP1,CNTN1,CTNNB1,DIO3,DIXDC1,DLC1,FGF10,FGF9,FOXA2,FOXC1,FOXP2,FYN,GLI3,GSX2,HES1,HOXA1,IGF1R,KHDRBS1,KHDRBS2,KIF14,L1CAM,LHX1,LMX1A,LMX1B,LRP6,MAP2K1,MDM4,MYO16,NEUROD1,NEUROD4,NFIA,NFIB,NLGN4X,NPAS3,NRCAM,NUMB,OGDH,OTX2,PAX5,PAX6,POU3F3,PSEN2,PTEN,PURA,RBFOX2,RDH10,RELN,RERE,RORA,SLC17A6,SMAD1,SRC,TBR1,TRNP1,TTBK2,TTC21B,VLDLR,WLS,ZBT…	72
Neurological Disease	Chorea	4.3e-09	ADCY7,ADRA2B,ADRA2C,ADRB1,AHCYL1,APLNR,ARHGAP32,ARPP19,ATP5MG,ATP6AP2,ATXN1,B2M,B3GNT2,B4GALNT1,B4GAT1,BASP1,BCL2,BDNF,BHLHE40,BIRC2,C4A/C4B,CALB1,CAMK4,CAMKK2,CASP2,CASP9,CCN2,CD160,CDK5R1,CDR1,CHAF1B,CHRM5,CLU,CNR1,CNR2,COX7B,COX7C,CREB1,CTNNB1,CX3CL1,CYCS,CYP2D6,CYP51A1,DDIT3,DDX60L,DIRAS2,DNAJA1,DTNA,DYNC1I1,ELAVL2,ELMO1,ENO3,ENPP5,EPHA4,FAM107A,FBXW7,FGF13,FOXG1,FOXO3,FOXP1,FRMD4B,G6PC,GABRA…	220
Cancer,Organismal Injury and Abnormalities,Reproductive System Disease	Breast cancer	4.55e-09	ABAT,ABCA1,ABCA2,ABCA8,ABHD10,ABI2,ABL1,ABL2,ACP5,ADAM17,ADAM9,ADAMTS18,ADAMTS3,ADAMTS4,ADAMTS8,ADCK1,ADCY6,ADGRB3,ADGRF5,ADK,ADRA2C,ADRB1,AGAP3,AIPL1,AJUBA,AKAP12,AKR1C1/AKR1C2,ALK,ALOX5,AMOTL2,ANAPC13,ANG,ANGPT2,ANKRD27,ANKRD52,ANLN,ANP32B,AP3B2,AP3M2,APOBEC3B,ARF4,ARHGAP19,ARHGEF2,ARHGEF3,ARID2,ARID5B,ARMCX5-GPRASP2/GPRASP2,ARMT1,ARPC5L,ASF1B,ATAD2,ATF2,ATF3,ATM,ATP2C1,ATP5IF1,ATR,ATRAID,B3GAL…	807
Cellular Assembly and Organization,Tissue Development	Fibrogenesis	4.75e-09	ABL1,ABL2,ACTA1,ACTR2,ADGRF5,AKAP11,ARHGAP18,ARHGAP19,ARHGAP32,ARHGAP6,ARHGEF10,ARHGEF12,ARHGEF18,ARHGEF2,ARHGEF3,AURKA,BAG4,BDKRB2,CALD1,CAMSAP2,CAV1,CAV3,CCDC88A,CCN2,CD47,CDC14A,CDC25B,CDK6,CDKN1B,CEP72,CERT1,CFL1,CFL2,CLASP1,CNR1,COBL,CREB1,CRH,CSF3,CTNND1,CTSB,CTTN,CYRIB,DAAM1,DCX,DKK1,DLC1,DSTN,EDNRA,EGFR,EPAS1,F2RL1,FAM107A,FAM171A1,FBXW7,FER,FGF13,FHDC1,FHIT,FHL1,FHOD1,FN1,GAP43,GATA4,GBA…	185
Cell Cycle	M phase of tumor cell lines	4.86e-09	AKAP12,ANLN,AURKA,AURKB,BCL2,CD2AP,CDC25B,CUEDC2,DCTN3,ECT2,GATA6,GNAI1,GNAI3,KIF13A,KIF14,KIF20B,KIF23,L3MBTL1,LMNA,MAP2K1,MYB,NCAPD2,NEK7,NEK9,OCRL,PI4KB,PIN1,RAB35,RAC1,RASSF1,RGS14,RHOA,SEPTIN6,SEPTIN7,SEPTIN9,SIAH1,SLC20A1,SPART,SPDL1,SSRP1,STAG1,STX16,TERF1,TINF2,TNKS,TOP2A,TOP2B,TRIP13,TTC19,UBAP2L,ZFYVE26	51
Neurological Disease,Organismal Injury and Abnormalities	Epilepsy	4.86e-09	AARS1,ABAT,ABCC8,ADRA2B,ADRB1,AP3B2,AP3M2,ARC,ARID5B,ARRDC3,ATF3,ATP6AP2,BBC3,BCL2L11,BDNF,BSN,C4A/C4B,CA1,CA3,CACNA1C,CACNA1E,CACNA2D1,CACNA2D2,CACNB4,CEBPD,CHD2,CITED2,CLU,CNPY3,CRH,CTSB,CYP2C19,CYP2C9,DCX,DEPDC5,DHFR,DNAJB5,DTNA,DUSP1,EGR3,ELL2,EPHX1,EPM2A,ERRFI1,FBXO33,FGF13,FGF7,FRRS1L,FYN,GABBR1,GABRA2,GABRA3,GABRA5,GABRA6,GABRB1,GABRB2,GABRE,GABRP,GABRR1,GAD2,GAL,GLI3,GLS,GRIA1,GRIN2B,HCN1…	152
Hereditary Disorder,Neurological Disease,Organismal Injury and Abnormalities,Psychological Disorders,Skeletal and Muscular Disorders	Huntington Disease	5.01e-09	ADCY7,ADRA2B,ADRA2C,ADRB1,AHCYL1,APLNR,ARHGAP32,ARPP19,ATP5MG,ATP6AP2,ATXN1,B2M,B3GNT2,B4GALNT1,B4GAT1,BASP1,BCL2,BDNF,BHLHE40,BIRC2,C4A/C4B,CALB1,CAMK4,CAMKK2,CASP2,CASP9,CCN2,CD160,CDK5R1,CDR1,CHAF1B,CHRM5,CLU,CNR1,CNR2,COX7B,COX7C,CREB1,CTNNB1,CX3CL1,CYCS,CYP2D6,CYP51A1,DDIT3,DDX60L,DIRAS2,DNAJA1,DTNA,DYNC1I1,ELAVL2,ELMO1,ENO3,ENPP5,EPHA4,FAM107A,FBXW7,FGF13,FOXG1,FOXO3,FOXP1,FRMD4B,G6PC,GABRA…	219
Developmental Disorder	Thoracic hypoplasia	5.07e-09	ABL1,ADAM17,ARID5B,ATF2,ATF7,ATM,BAG4,BAG6,CACNA2D2,CBL,CCN2,CCND3,CD3G,CDK6,CDKN1B,CTSD,CYP51A1,DICER1,E2F4,EDNRA,ESR2,ETS1,FGF10,FGF9,FOXP3,FUBP1,GATA4,GATA6,GNA11,GNAQ,HAND2,HAS2,HBEGF,HCK,HELLS,HEXIM1,HTR2B,IL6ST,IL7R,ITGA6,ITGAV,JMJD6,KMT2E,LCK,LOX,MAPK6,MAPK7,MDM4,MECOM,MED1,MEF2C,MYH10,MYOG,NFKB1,PCLAF,PDGFRA,PKP2,POFUT1,RAG1,RARB,RBPJ,RDH10,RORC,RSPO2,SHC1,SRC,TBX1,TCF12,TEAD1,TGFB2,TH,TN…	81
Cellular Assembly and Organization,Cellular Function and Maintenance,Tissue Development	Formation of actin stress fibers	5.07e-09	ABL1,ABL2,ADGRF5,ARHGAP32,ARHGAP6,ARHGEF10,ARHGEF12,ARHGEF18,ARHGEF2,ARHGEF3,BAG4,BDKRB2,CALD1,CAV1,CCDC88A,CCN2,CD47,CDC14A,CDK6,CLASP1,CREB1,CTNND1,CTTN,DAAM1,DLC1,EDNRA,EGFR,FAM171A1,FBXW7,FHDC1,FHOD1,FN1,GNA11,GNA13,GNAQ,GNG12,GNG2,GNG5,HGF,HTR2C,IKBKB,IL1A,ITGB1,KANK4,KRAS,LEP,LIMCH1,LPAR1,MAP2K1,MAPK1,MET,MTOR,MYLK,NET1,NOX4,NR4A1,PAK1,PAK2,PALLD,PDLIM1,PFN1,PFN2,PHLDB2,PIK3R1,PIP5K1B,PLD1,…	103
Cancer,Hematological Disease,Organismal Injury and Abnormalities	Lymphocytic neoplasm	5.13e-09	ABAT,ABCG1,ABL1,ABL2,ABRAXAS2,ACAD11,ACP5,ACSM6,ADAM7,ADAM9,ADD3,ADGRA2,ADGRB3,ADGRF5,ADGRL2,ADRB1,AGBL4,AGL,AHR,AKAP11,AKAP5,ALK,ALOX5,AMACR,ANGPT2,ANK3,ANKIB1,ANKRD36,ANKRD50,APOBEC3A,APOBEC3B,ARHGAP17,ARHGEF3,ARID2,ARID5B,ARMC9,ATF2,ATF3,ATF7,ATF7IP,ATM,ATP6V0D2,ATR,ATRNL1,ATXN1,ATXN3,ATXN7L1,AURKA,AURKB,B2M,BACH2,BAG2,BAK1,BAP1,BASP1,BAZ2B,BBC3,BCL10,BCL2,BCL2L10,BCL2L11,BCL2L13,BCR,BDNF,BLNK…	673
Cancer,Organismal Injury and Abnormalities	Serous neoplasm	5.26e-09	ABCA8,ABHD2,ABL1,ACP3,ACP5,ADIPOR2,AGBL4,AHRR,AIFM1,AK3,ALK,ALKBH3,ANKRD36,ANKRD50,ANXA8/ANXA8L1,ARHGEF12,ARID2,ARID5B,ARMC9,ATG2B,ATM,ATR,ATXN1,AURKA,B2M,B3GALNT1,BAHD1,BAP1,BCL10,BCL2,BCR,BNC1,BRPF3,BSN,BTLA,C2orf88,C4A/C4B,C8B,CACNA1C,CACNB2,CARD16,CCNA1,CCNB1,CD274,CD300E,CDH11,CDK13,CDK20,CDKN1B,CDKN2C,CENPA,CEP120,CEP41,CEP43,CEP97,CHRDL1,CKAP4,CLASP1,CLU,CNBD2,COL4A6,CREBRF,CRKL,CSMD1,CTNN…	345
Cell Death and Survival	Cell death of immune cells	5.29e-09	ABCG1,ABL1,ADAM17,ADRB1,AHR,AIFM1,AKTIP,ANGPT2,ANKZF1,ARID5B,ATF3,ATM,AURKB,BAG1,BAG2,BAK1,BBC3,BCL10,BCL2,BCL2A1,BCL2L11,BID,BIRC2,BLK,BLNK,BMP2,BTLA,CAMK4,CASP2,CASP9,CAV1,CBL,CCL3,CCND2,CCR8,CD1D,CD226,CD274,CD28,CD300A,CD47,CD69,CD70,CD80,CDK2,CDKN1B,CEBPA,CLOCK,CLU,CNR1,CNR2,CREB1,CRKL,CSF3,CTNNB1,CTSB,CTSD,CXCL1,CXCL2,DAPK1,DDIT3,DEK,DFFA,DICER1,DNMT3B,EBF1,EFNA1,EGFR,EGR3,EPHA4,ETS1,EZR,FA…	238
Organismal Injury and Abnormalities	Edema	5.29e-09	ABCA5,ABL1,ABL2,ACE2,ADAM17,ADAMTS3,ADRA2B,ADRA2C,ADRB1,AHR,ANGPT2,BAG6,BCL2,BCR,BDKRB2,CA1,CA3,CAV1,CCDC88A,CCND2,CCND3,CD151,CD2AP,CDK2,CDX4,CEACAM6,CEACAM7,CHRM5,CITED2,CLEC1B,CNR2,CREB1,CRH,CRK,CXADR,DHFR,DIS3,DOCK1,DPYD,DTNA,DUSP1,E2F3,EDNRA,EPHA2,EPHA3,ERG,ESR2,F2RL1,FBXW7,FCGRT,FKBP1A,FN1,FOXC2,FOXO3,FZD6,GABRA2,GABRA3,GABRA5,GABRA6,GABRB1,GABRB2,GABRE,GABRP,GABRR1,GAL,GALP,GATA4,GATA6,GJB…	155
Cancer,Endocrine System Disorders,Organismal Injury and Abnormalities,Reproductive System Disease	Gonadal tumor	5.59e-09	ABAT,ABCA1,ABCA8,ABCC8,ABHD2,ABL1,ACAD11,ACE2,ACP3,ACP5,ACTR2,ADAM10,ADAM17,ADAMTS3,ADCYAP1R1,ADGRB3,ADGRF5,ADIPOR2,AGBL4,AGL,AHRR,AIFM1,AK3,AKR1C1/AKR1C2,AKTIP,ALCAM,ALK,ALKBH3,ALS2,ANG,ANGPT2,ANKIB1,ANKRD36,ANKRD50,ANKRD52,ANKRD55,ANLN,ANXA8/ANXA8L1,ARHGAP32,ARHGEF12,ARHGEF18,ARID2,ARID5B,ARMC9,ATAD2,ATG2B,ATM,ATP8A1,ATR,AURKB,B2M,B3GALNT1,BAG6,BAHD1,BAP1,BBS10,BCL10,BCL2,BCL2L11,BCR,BMP2K,BMPR…	654
Cancer,Organismal Injury and Abnormalities	Upper aero-digestive squamous cell carcinoma	5.59e-09	ABCA1,ABCA2,ABCB4,ACAD11,ADAM17,ADAM9,ADD3,ADGRB3,ADGRE5,AHI1,AIFM1,AKAP11,ALK,ALOX5,AMMECR1,AMMECR1L,ANKRD50,ANKS1B,ANKZF1,AP2B1,AQP2,ARC,ARHGAP18,ARHGAP6,ARID2,ARID4B,ARID5B,AS3MT,ASB5,ASPH,ASPN,ATF2,ATF5,ATM,ATP13A3,ATP2C1,ATP6V0A2,ATRNL1,ATXN1,ATXN3,ATXN7L3,AURKA,AURKC,BAG1,BAHD1,BAZ2B,BCL2,BDKRB2,BDP1,BHLHE22,BMP2,BMPR1B,BNC2,BRINP2,BRPF3,BTF3L4,C12orf4,C16orf72,C6orf118,CACNA1E,CACNA2D2,CAL…	593
Cell Cycle	Mitosis	5.72e-09	ABL1,ABRAXAS2,ACSM5,ADGRL2,AHR,AJUBA,ANGEL2,ANLN,ARPP19,ATM,ATR,AURKA,AURKB,BAP1,BCL2,BEX4,BMP2,BMP6,BRINP2,BTG4,BTRC,BUB3,CAV2,CBL,CCNB1,CCP110,CCT4,CD28,CDC14A,CDC25B,CDC5L,CDCA8,CDK13,CDK2,CDKN1B,CENPA,CEP250,CEP72,CHD7,CHMP7,CLASP1,CRK,CSK,DBI,DICER1,DNA2,DYNLT3,E2F3,EGFR,ELOC,EPGN,EPS8,ERBB3,ERRFI1,ESPL1,FGF10,FGF7,FGF9,FOXC1,FOXG1,FOXO3,FYN,GEM,GNAI3,GNL3,GRB2,GRK4,HAUS2,HBEGF,HECA,HELLS,HG…	195
Cellular Development,Cellular Growth and Proliferation,Hair and Skin Development and Function,Organ Development,Tissue Development	Proliferation of epidermal cells	5.79e-09	ANGPTL6,ATF2,BMP6,CCNG2,CDK2,CLU,CTNNA1,CTSV,DDX5,DSG4,E2F7,EFNB2,EGFR,EPHA2,ERBIN,ERN1,FGF10,FGF7,FST,FYN,HAS2,HGF,IL17A,IL36G,IRF6,ITGB1,JUN,KLF10,KLF4,KLF5,KRAS,LRIG1,MAP2K4,MAP3K3,MAPK7,MAPK8,MAPK9,MAPKAPK2,MED1,MT3,NAB1,NR3C1,PAK1,PAK2,PAQR3,PKP1,PLCE1,PPP1R13L,PRKCI,PRKD1,PTAFR,PTEN,PTGER2,PTH,PTHLH,PTPRZ1,RARG,RNF7,SDR16C5,SMAD7,SNAI2,SRSF6,TAC1,TGFA,TGFB2,TP63,TRH,VIP,WNT16,YAP1,ZFP36,ZFP…	73
Cancer,Endocrine System Disorders,Organismal Injury and Abnormalities,Reproductive System Disease	Development of gonadal tumor	5.9e-09	ABCA1,ABCA8,ABHD2,ABL1,ACAD11,ACE2,ACP3,ACP5,ACTR2,ADCYAP1R1,ADGRB3,ADGRF5,ADIPOR2,AGBL4,AGL,AHRR,AIFM1,AK3,AKR1C1/AKR1C2,AKTIP,ALK,ALKBH3,ALS2,ANKIB1,ANKRD36,ANKRD50,ANKRD52,ANKRD55,ANLN,ANXA8/ANXA8L1,ARHGAP32,ARHGEF12,ARHGEF18,ARID2,ARID5B,ARMC9,ATAD2,ATG2B,ATM,ATP8A1,ATR,AURKB,B2M,B3GALNT1,BAG6,BAHD1,BAP1,BBS10,BCL10,BCL2,BCR,BMPR1A,BMPR1B,BNC1,BOD1L1,BRPF3,BSN,BTLA,BTRC,C2orf88,C4A/C4B,C6orf1…	538
Organismal Development,Tissue Development	Development of exocrine gland	5.98e-09	AHR,APLN,APRT,ATM,BCL2L11,BIRC2,BTRC,CAV1,CBL,CDKN1B,CDKN2C,CDO1,CEBPD,CREB1,CSN2,CTNND1,CUZD1,DKK1,DSG2,EGFR,EPGN,ERBB3,ESR2,FAT1,FGF10,FGF7,FN1,FOXC1,FYN,GAL,GHRHR,GLI3,GSN,HEXIM1,HEYL,HGF,HOXA9,HS2ST1,HS6ST2,IGF1R,IRS1,IRS2,ITGA6,ITGB1,KALRN,LBH,LEP,LEPR,LIF,MED1,MET,MMP9,MTOR,MYBL1,NCOA2,NET1,NEUROD1,NME1,NR3C1,NRG1,NRG3,NRP1,NUMB,OTX2,PAX6,PGR,PHB2,PIN1,PTEN,PTGER2,PTHLH,PTPRF,RUNX2,SIRT1,SL…	94
Cancer,Organismal Injury and Abnormalities,Reproductive System Disease	Mammary tumor	6.24e-09	ABAT,ABCA1,ABCA2,ABCA8,ABHD10,ABI2,ABL1,ABL2,ACP5,ADAM17,ADAM9,ADAMTS18,ADAMTS3,ADAMTS4,ADAMTS8,ADCK1,ADCY6,ADGRB3,ADGRF5,ADK,ADRA2C,ADRB1,AGAP3,AGPS,AIPL1,AJUBA,AKAP12,AKR1C1/AKR1C2,ALK,ALOX5,AMOTL2,ANAPC13,ANG,ANGPT2,ANKRD27,ANKRD52,ANLN,ANP32B,AP3B2,AP3M2,APOBEC3B,ARF4,ARHGAP19,ARHGEF2,ARHGEF3,ARID2,ARID5B,ARMCX5-GPRASP2/GPRASP2,ARMT1,ARPC5L,ARRDC3,ASF1B,ATAD2,ATF2,ATF3,ATM,ATP2C1,ATP5IF1,ATR,…	847
Cardiovascular System Development and Function,Embryonic Development,Organ Development,Organismal Development,Tissue Development	Cardiogenesis	6.28e-09	ABL1,ACKR3,ACVR1,ACVR2B,ADAM17,AHI1,AKAP5,AP2B1,AP3M2,AP3S2,AP4E1,APLN,APLNR,ARID2,ARID4B,ARL13B,ATF2,ATF7,ATM,BAG4,BDNF,BMP2,BMP5,BMPR1A,BVES,CACNA1C,CAPNS1,CAV1,CAV3,CC2D2A,CCDC103,CCN3,CCND2,CCND3,CDK2,CDKN1B,CERT1,CFL2,CHD7,CITED2,CNMD,CREB1,CRK,CRKL,CSRP3,CTBP2,CTNNB1,CUL5,CXADR,CYCS,CYP51A1,DAAM1,DAW1,DCHS1,DCTN5,DICER1,DLC1,DNAJB6,DTNBP1,DUSP1,EDNRA,EFNA1,EGFR,EGLN1,EMP1,EPHA3,ERBB3,F2RL2,…	216
Cancer,Organismal Injury and Abnormalities	Serous adenocarcinoma	7.16e-09	ABCA8,ABHD2,ABL1,ACP3,ACP5,ADIPOR2,AGBL4,AHRR,AIFM1,AK3,ALK,ALKBH3,ANKRD36,ANKRD50,ANXA8/ANXA8L1,ARHGEF12,ARID2,ARID5B,ARMC9,ATG2B,ATM,ATR,ATXN1,AURKA,B2M,B3GALNT1,BAHD1,BAP1,BCL10,BCL2,BCR,BNC1,BRPF3,BSN,BTLA,C2orf88,C4A/C4B,C8B,CACNA1C,CACNB2,CARD16,CCNA1,CCNB1,CD274,CD300E,CDH11,CDK13,CDK20,CDKN1B,CDKN2C,CENPA,CEP120,CEP41,CEP43,CEP97,CHRDL1,CKAP4,CLASP1,CLU,CNBD2,COL4A6,CREBRF,CRKL,CSMD1,CTNN…	342
Cancer,Organismal Injury and Abnormalities	Neoplasia of epithelial cells	7.54e-09	ABCA1,ABCA2,ABCB4,ABCG1,ABL1,ABL2,ACAD11,ACO2,ACOXL,ACSM5,ACSM6,ADAM17,ADAM9,ADAMTS18,ADD3,ADGRB3,ADGRE5,ADGRL2,AGAP5 (includes others),AHI1,AIFM1,AJUBA,AKAP11,AKAP12,AKNAD1,ALAD,ALCAM,ALK,ALOX5,ALS2,AMMECR1,AMMECR1L,ANK3,ANKRD36,ANKRD50,ANKRD52,ANKS1B,ANKZF1,ANLN,AOAH,AP2B1,APBA2,APOBEC3B,AQP2,ARAP2,ARC,ARFGEF3,ARHGAP18,ARHGAP6,ARID2,ARID4B,ARID5B,ARIH1,ARMCX1,ART4,AS3MT,ASB11,ASB5,ASCC1,ASPH,AS…	1108
Hair and Skin Development and Function,Organ Development	Growth of skin	7.58e-09	ANGPTL6,APRT,ATF2,BMP6,CAV1,CCNG2,CDK2,CLU,CTNNA1,CTNNB1,CTSV,DDX5,DSG4,E2F7,EFEMP1,EFNB2,EGFR,EPHA2,ERBIN,ERN1,FGF10,FGF7,FST,FYN,HAS2,HGF,HOXC13,IGF1R,IL17A,IL36G,IRF6,ITGB1,JUN,KLF10,KLF4,KLF5,KRAS,L1CAM,LMNA,LRIG1,MAP2K4,MAP3K3,MAPK7,MAPK8,MAPK9,MAPKAPK2,MED1,MT3,NAB1,NFKBIZ,NOG,NR3C1,PAK1,PAK2,PAQR3,PKP1,PLCE1,PPP1R13L,PRKCI,PRKD1,PTAFR,PTEN,PTGER2,PTH,PTHLH,PTPRZ1,RAPGEF2,RARG,RNF7,SDR16C5,…	89
Cellular Movement,Connective Tissue Development and Function	Cell movement of fibroblasts	8.05e-09	ABL1,ABL2,APPL1,ARID5B,BAG4,CAPNS1,CAV1,CCDC88A,CCN3,CDKN1B,CRKL,CTNNB1,ENAH,EZR,FN1,FRMD6,FRS2,GNA13,GSN,HBEGF,HGF,HMGB1,HTN1,IKBKB,IQCJ-SCHIP1,ITGB1,JUN,L1CAM,LEP,LPAR1,LPP,MAP2K1,MAP3K1,MAP3K8,MAPK1,MAPKAPK2,MET,MRC2,MYH10,NCK2,NDST1,NDST3,PAK1,PALLD,PDLIM1,PGGT1B,PIP5K1A,PLAU,PMP22,PRKAA1,PRKAR1A,PRKCE,PTEN,RAC1,RAP2A,RECK,S1PR1,SCHIP1,SDC4,SKAP2,SNX17,SRC,STMN1,SYNE2,TGFBR1,THBS1,THBS2,TNS1,…	74
Cell Morphology,Cellular Assembly and Organization,Cellular Development,Cellular Function and Maintenance,Cellular Growth and Proliferation,Embryonic Development,Nervous System Development and Function,Organismal Development,Tissue Development	Dendritic growth/branching	8.09e-09	ABL2,ADAM10,ADAMTS3,ADAMTS4,AKAP5,ANKRD27,ARHGAP32,ATF3,ATXN1,BACE1,BDNF,BSN,CALD1,CAMK4,CAMKK2,CAPNS1,CAV1,CCDC88A,CDK5R2,CFL1,CHMP2B,CNR1,CPEB4,CREB1,CRMP1,CTNNA2,CTNND2,DAB2IP,DACT1,DCX,DICER1,DOCK1,DSCAM,DTNBP1,EIF4EBP2,ELAVL4,ELMO1,EPS8,FAM107A,FMR1,FNBP1,GDNF,GJB2,GNA13,GRM5,HGF,ITGB1,KALRN,KIDINS220,L1CAM,LEP,LGI1,LRRC4,LRRC7,LYPLA1,MAP2K4,MAPK1,MET,MOG,MT2A,MTOR,MYO5B,NEUROD1,NOS1AP,NR4A1…	110
Cancer,Endocrine System Disorders,Organismal Injury and Abnormalities,Reproductive System Disease	Development of ovarian tumor	8.46e-09	ABCA1,ABCA8,ABHD2,ABL1,ACAD11,ACE2,ACP3,ACP5,ACTR2,ADCYAP1R1,ADGRB3,ADGRF5,ADIPOR2,AGBL4,AGL,AHRR,AIFM1,AK3,AKR1C1/AKR1C2,AKTIP,ALK,ALKBH3,ALS2,ANKIB1,ANKRD36,ANKRD50,ANKRD52,ANKRD55,ANLN,ANXA8/ANXA8L1,ARHGAP32,ARHGEF12,ARHGEF18,ARID2,ARID5B,ARMC9,ATAD2,ATG2B,ATM,ATP8A1,ATR,AURKB,B2M,B3GALNT1,BAG6,BAHD1,BAP1,BBS10,BCL10,BCL2,BCR,BNC1,BOD1L1,BRPF3,BSN,BTLA,BTRC,C2orf88,C4A/C4B,C6orf118,C8B,CACNA1E…	536
Respiratory Disease	Respiratory failure	8.77e-09	ADAM17,ADRA2B,ADRA2C,ADRB1,ATF2,BAG6,BDNF,CACNA2D2,CAPRIN1,CCN2,CEBPA,CHRM5,CHRNA6,CHRNA9,CLP1,COL25A1,CTNNB1,EGFR,EIF4E2,ELK3,EPAS1,ERBB3,FGF9,FST,GABRA2,GABRA3,GABRA5,GABRA6,GABRB1,GABRB2,GABRE,GABRP,GDNF,GRIN2B,GSKIP,HELLS,HOXA1,IGF1R,KCNE2,KCNJ2,KCNJ5,MAN2A1,MAPK6,MPO,MYF6,MYOG,NDST1,NR3C1,OLIG3,PBX3,PDPN,PGR,PPP3R1,PRRX1,PTHLH,RHOT1,RSPO2,RUNX2,SLC12A5,SLC17A6,SLC5A3,SNAP25,SPAG17,SYNE2,TBX1…	72
Cancer,Endocrine System Disorders,Organismal Injury and Abnormalities,Reproductive System Disease	Ovarian adenocarcinoma	1.06e-08	ABCA1,ABCA8,ABHD2,ABL1,ACAD11,ACE2,ACP3,ACP5,ACTR2,ADCYAP1R1,ADGRB3,ADGRF5,ADIPOR2,AGBL4,AGL,AHRR,AIFM1,AK3,AKR1C1/AKR1C2,AKTIP,ALK,ALKBH3,ALS2,ANKIB1,ANKRD36,ANKRD50,ANKRD52,ANKRD55,ANLN,ANXA8/ANXA8L1,ARHGAP32,ARHGEF12,ARHGEF18,ARID2,ARID5B,ARMC9,ATAD2,ATG2B,ATM,ATP8A1,ATR,AURKB,B2M,B3GALNT1,BAG6,BAHD1,BAP1,BBS10,BCL10,BCL2,BCR,BNC1,BOD1L1,BRPF3,BSN,BTLA,BTRC,C2orf88,C4A/C4B,C6orf118,C8B,CACNA1E…	534
Reproductive System Development and Function	Morphology of reproductive system	1.08e-08	ABCA1,ABCG1,ABCG5,ACP3,ADAM17,ADAMTS3,AFF4,AHR,AKAP12,ALK,AQP7,AQP8,ARID4B,ARID5B,ARL4A,ASZ1,ATAT1,ATF2,ATM,AURKC,BAK1,BCAT2,BCL2,BCL2L11,BDKRB2,BMPR1B,BNC1,BOLL,BTRC,CABLES1,CAMK4,CASP2,CAV1,CBL,CBX2,CCNA1,CCND2,CCNE2,CDC25B,CDK2,CDKN1B,CDKN2C,CDX4,CEBPD,CNBD2,CNOT7,CPEB1,CRKL,CSTF2T,CTNNB1,CUZD1,DACT1,DDIAS,DIO3,DLX3,DMRTB1,DNAAF6,DNAJA1,DUSP1,E2F3,E2F4,E2F5,E2F7,EFEMP1,EGFR,EGLN1,ELMO1,EPN1,ER…	266
Cell Death and Survival,Organismal Injury and Abnormalities	Cell death of epithelial cells	1.09e-08	AAK1,ADAMTS3,AHR,AIFM1,AIFM3,APOBEC3B,ATF2,ATF3,ATF7,ATM,ATXN3,AURKA,BAG1,BAG4,BAK1,BBC3,BCL10,BCL2,BCL2A1,BCL2L10,BCL2L11,BID,BIRC2,BNIP3,CA3,CABLES1,CALB1,CALCR,CASP2,CASP9,CBL,CCN6,CD151,CD1D,CDC37,CDK6,CDKN1B,CEBPA,CEBPD,CERS2,CITED2,CLIC4,CTNNA1,CTNNB1,CTSB,CYCS,DAB2,DAB2IP,DAP3,DDIT3,DFFA,DICER1,E2F7,EGFR,EMP1,EMP2,ENTPD5,EPHA2,ERBB3,ERN1,ESR2,EXOC5,FAIM,FAP,FER,FGF7,FOXF2,FOXO1,FOXO3,FYN,G…	194
Cancer,Hematological Disease,Immunological Disease,Organismal Injury and Abnormalities	Neoplasia of leukocytes	1.11e-08	ABAT,ABCG1,ABL1,ABL2,ABRAXAS2,ACAD11,ACP5,ACSM6,ADAM7,ADAM9,ADD3,ADGRA2,ADGRB3,ADGRF5,ADGRL2,ADRB1,AGBL4,AGL,AHR,AKAP11,AKAP5,ALK,ALOX5,AMACR,ANGPT2,ANK3,ANKIB1,ANKRD36,ANKRD50,APOBEC3A,APOBEC3B,ARHGAP17,ARHGEF3,ARID2,ARID5B,ARMC9,ATF2,ATF3,ATF7,ATF7IP,ATM,ATP6V0D2,ATR,ATRNL1,ATXN1,ATXN3,ATXN7L1,AURKA,AURKB,B2M,BACH2,BAG2,BAK1,BAP1,BASP1,BAZ2B,BBC3,BCL10,BCL2,BCL2L10,BCL2L11,BCL2L13,BCR,BDNF,BLNK…	673
Cancer,Organismal Injury and Abnormalities	Squamous-cell carcinoma	1.13e-08	ABCA1,ABCA2,ABCB4,ABCG1,ABL1,ABL2,ACAD11,ACO2,ACOXL,ACSM5,ACSM6,ADAM17,ADAM9,ADAMTS18,ADD3,ADGRB3,ADGRE5,ADGRL2,AGAP5 (includes others),AHI1,AIFM1,AJUBA,AKAP11,AKAP12,AKNAD1,ALAD,ALCAM,ALK,ALOX5,ALS2,AMMECR1,AMMECR1L,ANK3,ANKRD36,ANKRD50,ANKRD52,ANKS1B,ANKZF1,ANLN,AOAH,AP2B1,APBA2,APOBEC3B,AQP2,ARAP2,ARC,ARFGEF3,ARHGAP18,ARHGAP6,ARID2,ARID4B,ARID5B,ARIH1,ARMCX1,ART4,AS3MT,ASB11,ASB5,ASCC1,ASPH,AS…	1104
Digestive System Development and Function	Development of gastrointestinal tract	1.17e-08	ACVR1,ACVR2B,AMTN,AQP5,ARID5B,ASPH,ASPN,BCL2,BCL2L11,BDNF,BMP2,BMP5,BMPR1A,BNC2,CASP9,CHD7,CLCN5,COBL,CSRNP1,CTNNB1,CTNND1,DCHS1,DICER1,DKK1,DLX3,DLX5,DMP1,EDAR,EDARADD,EDNRB,EGFR,ERBB3,EYA1,FGF10,FGF4,FGF9,FN1,FOXC1,FOXF1,FOXF2,FST,FZD1,GABRA2,GABRA3,GABRA5,GABRA6,GABRB1,GABRB2,GABRE,GABRP,GABRR1,GATA4,GLI3,GRIN2B,GSKIP,HAND2,HOXA5,HOXC13,HOXD13,INHBA,INSIG1,INSIG2,IQCJ-SCHIP1,IRF6,ISL1,ITGA6,IT…	119
Psychological Disorders	Severe psychological disorder	1.23e-08	ABAT,ACAD11,ACOT7,ADAMTS3,ADCY7,ADRA2B,ADRA2C,ADRB1,AKAP11,ANK3,ANKHD1/ANKHD1-EIF4EBP3,APBA2,ATF2,ATXN1,BDNF,BMT2,BTG1,C4A/C4B,CA1,CA3,CACNA1C,CACNA2D1,CACNA2D2,CACNB2,CALB1,CAP2,CAV1,CCK,CCND2,CD46,CDC25B,CDKN1B,CELF2,CHRM5,CHRNA6,CHRNA9,CHST11,CLOCK,CLU,CNKSR1,CNR1,CNR2,CREB1,CRH,CRHR2,CSMD1,CTNNA2,CTSB,CYP2D6,CYP3A5,DAB1,DAOA,DAP3,DDC,DGCR2,DGKH,DHFR,DICER1,DLAT,DPYD,DTNBP1,DUSP1,EBF1,EGFR,ELA…	263
Organismal Injury and Abnormalities,Tissue Morphology	Abnormal morphology of epithelial tissue	1.26e-08	ABCA1,ABCB10,ABCB4,ABL1,ACP3,ADAM17,ADAM9,ADGRF5,AGL,AHR,AIPL1,B4GALNT1,BACE2,BBS10,BCL2,BCL2L11,BCR,BDKRB2,BDNF,BID,CASP9,CAV1,CAV2,CCN2,CD151,CD46,CDK20,CDKN1B,CDKN2C,CEBPA,CEBPD,CERS3,CITED2,CLIC4,COL13A1,CRH,DKK2,DLX5,DNAJA1,E2F3,E2F4,EDNRB,EGFR,ELK3,ELMO1,ENTPD5,EPAS1,ERBB3,ERRFI1,ESR2,FGF10,FGF20,FLRT3,FOXA2,FOXC2,FOXP3,FSHB,FST,FSTL1,G6PC,GATA6,GBA2,GDNF,GLRX,GPR34,HBEGF,HDAC7,HEXB,HGF,HOX…	174
Respiratory System Development and Function	Morphology of respiratory system	1.4e-08	ABCA1,ACE2,ACVR2B,ADAM17,ADAMTS18,ADGRF5,ADRA2B,AFF4,AKAP12,ASPH,ATF2,ATXN1L,BCL2,BID,CASP9,CAV1,CAV2,CCN2,CDH11,CDO1,CEBPA,CHL1,CITED2,CLEC1B,COL13A1,CREB1,CRH,CRK,CRKL,DCHS1,DKK1,DLX5,DOCK1,DUSP1,E2F4,EGFR,EGLN3,ELK3,EPAS1,EPHA3,ERRFI1,ESR2,EYA1,F11,FGF10,FGF9,FOXA2,FOXO1,FST,FSTL1,FUBP1,GATA4,GATA6,GPC3,GSX2,HBEGF,HES1,HEXB,HOXA5,IL17A,ITGA6,ITGA8,ITGB6,JMJD6,LAMC1,LFNG,LIF,LOX,LOXL1,LPAR1,LPL…	134
Embryonic Development,Organismal Development,Tissue Morphology	Size of embryo	1.47e-08	ACVR1,ADAM10,AIFM1,ARHGEF12,ATP2C1,AURKA,BMP2,BMPR1A,CCN3,CCNE2,CDK2,CDK5R1,CDK5R2,CDK6,CDKN1B,CFL1,CIAPIN1,CITED2,COPS5,COPS8,CSK,CTNNB1,CXADR,CYCS,DAB2,DDX11,DICER1,DLX5,DNMT3B,E2F7,EFNB2,EGFR,EPN1,ERN1,ESPL1,EXT1,EYA1,FBXW7,FGF7,FN1,FOXA2,FOXC2,FRS2,GATA4,GATA6,GJB2,GOPC,HAND2,HES1,HGF,HOXA1,HOXD13,HTR2B,IGF1R,IL6ST,ISL1,ITGB8,ITPR1,KIF5B,KRAS,LFNG,LHX1,LIMS1,LIN28A,MAPK1,MAPK7,MDM4,MECOM,MED1…	140
Cell Cycle	Interphase of tumor cell lines	1.58e-08	AASDHPPT,ABL1,AHR,AMACR,APOBEC3A,ATF2,ATF5,ATM,ATR,BAP1,BCL2,BHLHE40,BMP2,BTRC,CAMK1,CAMK2N1,CAMKK2,CASP9,CCNB1,CCND2,CCND3,CCNG1,CCNG2,CDC25B,CDCA2,CDK2,CDK5RAP3,CDK6,CDKN1B,CDKN3,CEBPA,CEBPD,CELF2,CNDP2,COPS5,CREG1,CRH,CSF3,CTNNB1,CTNND1,CYP1B1,DAB2,DAB2IP,DARS1,DCX,DDIT3,DDX24,DESI2,DTD1,DTL,DUSP1,E2F5,E2F7,EGFR,ERBB3,ERG,ESR2,ETS1,FAM168A,FBXL2,FHIT,FOXA1,FOXO1,FOXO3,FOXP3,GATA6,GLI3,GNL3,GRK…	175
Behavior	Conditioning	1.59e-08	ABI2,ADCYAP1R1,ALK,ARC,ASIC1,BACE1,BCAT2,BDNF,BMPR1A,BMPR1B,BTG1,CAMK4,CAMKK2,CCDC88A,CCK,CEBPD,CERS6,CLOCK,CNR1,CREB1,CRH,CSK,EIF4EBP2,EPM2A,EPS8,ESR2,FEV,FMR1,FOXO3,FXR2,GABBR1,GABRA2,GABRA5,GAD2,GDNF,GJD2,GMFB,GNAI1,GPR85,GRIA1,GRID2,GRIK2,GRM1,GRM5,GRM7,HBEGF,HCN1,HOMER1,HOMER2,HTR1B,IDNK,IL15RA,ITM2B,KALRN,KCTD12,KCTD16,KIF17,KMT2A,LYNX1,LYPD1,MMP9,NAMPT,NAT8L,NREP,NRG3,NRN1,PAK1,PDE8B,PENK,…	93
Cellular Movement,Hair and Skin Development and Function	Migration of epithelial cell lines	1.6e-08	AHR,ALCAM,ARF4,ARHGEF12,CCR8,CDH11,CHL1,CLASP1,CNR1,CREB3L2,CTTN,DOCK1,DOCK4,EPHA2,ERRFI1,FGA,FHIT,FOXO1,FYN,GAB1,GRB2,HARS1,HGF,INHBA,ITGA1,ITGB1,ITGB2,KDM3A,KIF2A,L1CAM,MYH10,NARS1,NFKB1,PLAU,POSTN,PTEN,PTP4A1,PTPN12,QKI,RECK,RHOA,RICTOR,RUNX2,SARS1,SHC1,SRC,STAT5B,TGFB2,TGFBR1,TMEFF2,TSC22D3,VEGFD	52
Embryonic Development,Organismal Development	Development of abdomen	1.6e-08	ABL1,ACVR2B,ADAM17,AHR,APRT,AQP11,ARID5B,ATF2,ATF3,ATF7,ATM,BAG6,BAK1,BCL2,BCL2L11,BDKRB2,BDNF,BMP2,BMP6,CACNB4,CAMK4,CASP9,CAV1,CBX2,CCN2,CCND2,CCND3,CD80,CDKN1B,CEBPA,CIAPIN1,CITED2,CLEC1B,CLU,CNR2,COBL,COL4A4,CPEB1,CRH,CSF3,CTNNB1,CTNND1,CX3CL1,DCHS1,DICER1,DKK1,EDNRA,EDNRB,EFEMP1,EIF2B4,EPAS1,EPB42,ERBB3,ERG,ESR2,EYA1,EZR,FABP2,FGF10,FGF7,FGF9,FMR1,FOXA2,FOXC1,FOXC2,FOXD1,FOXF1,FOXF2,FOXO1,FO…	237
Cell Morphology	Shape change of tumor cell lines	1.65e-08	ACVR1C,AKAP12,BCL10,CALCB,CBL,CD151,CDH11,CLEC1B,CRK,CTNND1,DAPK1,DIAPH2,DOCK1,EDNRA,EDNRB,EGFR,EPHA2,FN1,FYB1,GAP43,GEM,GIT2,GNA11,GNA13,GNAQ,HES1,HGF,HOOK1,HTR4,IL6R,ITGB1,KRAS,LCP2,MAP3K5,MAPK1,MAPK8,MARCKS,MET,MGAT5,MMP9,MYADM,MYH10,NET1,NOX4,PAK1,PFN1,PGR,PIP5K1A,PITX2,PLAU,PLD1,PPFIA1,PRKCB,PRKD1,PTGER3,RAC1,RAP1B,RAP2B,RAP2C,RHOA,ROCK2,RPS6KB1,SAMSN1,SDC2,SDC4,SIRPA,SMAD4,SNAI2,SPRY2,SRC,T…	74
Cell-To-Cell Signaling and Interaction,Cellular Assembly and Organization,Cellular Function and Maintenance	Formation of focal adhesions	1.66e-08	ABL1,AJUBA,AKAP12,ARHGAP6,ARHGEF3,BCL2,BCR,CALD1,CAV1,CFL1,CLASP1,CORO1C,CRKL,CTNND1,CTTN,DLC1,DSE,DUSP22,DUSP3,EFNA5,EPHA3,FAM107A,FN1,GNA11,GNG12,GNG2,GNG5,GPM6B,GREM1,HGF,HMGB1,ITGB1,KDR,KRAS,LIMCH1,LIMS1,MAP4K4,NET1,NRP1,PAK1,PHLDB2,PIP5K1A,PPM1F,PRKCE,PRKCI,PTEN,RAC1,RBBP4,RCC2,RHOA,ROCK1,ROCK2,S1PR1,SDC4,SKAP2,SLK,SPRY2,SRC,STMN1,TESK2,THBS1,TNS3,TSC1,UTS2,VEGFA	65
Cancer,Organismal Injury and Abnormalities	Ductal carcinoma	1.66e-08	AAK1,AATK,ABAT,ABCB4,ABL1,ABRA,ACE2,ACKR3,ACO1,ACOXL,ACP5,ACSF2,ACSM3,ACSM5,ACSM6,ACY1,ADAM10,ADAM17,ADAMTS18,ADAMTS3,ADCYAP1R1,ADGRB3,ADGRL2,ADRA2B,AGBL4,AGL,AGO1,AGPAT4,AGPAT5,AJAP1,AKAP11,ALK,ALOX5,ALS2,ANK3,ANKHD1/ANKHD1-EIF4EBP3,ANKMY2,ANKRD44,ANKRD52,ANKZF1,ANP32E,AP3B2,AP3S1,AP4E1,APLNR,APPL1,ARHGAP32,ARHGEF10,ARHGEF12,ARID2,ARID5B,ARL13B,ARMC9,ARMCX5-GPRASP2/GPRASP2,ASPH,ATG16L1,ATG2B,ATM…	845
Cancer,Organismal Injury and Abnormalities,Respiratory Disease	Non-small cell lung carcinoma	1.69e-08	A4GNT,ABCA5,ABCB10,ABL1,ABL2,ABRAXAS2,ACE2,ADAM17,ADAM9,ADAMTS3,ADCYAP1R1,ADGRB3,ADGRL2,AGFG2,AGO1,AHR,AIFM1,AIPL1,AJAP1,AJUBA,ALCAM,ALDH8A1,ALK,AMACR,ANAPC1,AOAH,AP3S1,APOBEC3B,AQP10,AQP8,ARAP2,ARFGAP2,ARHGAP6,ARHGEF12,ARID2,ARID4B,ARID5B,ARMCX1,ASB11,ASZ1,ATAD2,ATF7IP,ATM,ATP10B,ATP5F1B,ATP5IF1,ATR,ATRNL1,ATXN1,AURKA,AURKB,B2M,BACE2,BAG6,BAP1,BBC3,BCL2,BCL2L11,BICRAL,BLK,BLNK,BMP2K,BMPR1B,BOD1L…	697
Neurological Disease,Organismal Injury and Abnormalities	Cognitive impairment	1.71e-08	ABCD2,ADK,ADRA2B,ADRA2C,ADRB1,AFF4,AHI1,AKAP5,ANK3,AP1S2,AP4E1,AP4M1,ARC,ARID2,ASIC1,ATM,ATP2C1,ATP6AP2,ATXN1,B3GALNT2,B4GAT1,BACE1,BCL2,BDNF,C12orf4,CA1,CA3,CACNA1C,CACNA2D1,CACNB2,CAMKK2,CASP2,CBLN2,CC2D2A,CCDC88A,CCN2,CCNB1,CD160,CD47,CD96,CDH11,CDK13,CDK5R1,CERT1,CHAMP1,CHRM5,CNKSR1,CNR1,COL9A1,CREB1,CRMP1,CSK,CTNNA2,CTNNB1,CXADR,CXorf56,DCX,DDC,DDHD2,DFFA,DLAT,DLGAP2,DNMT3B,EBF3,EED,EIF4EBP2…	269
Cell Cycle	Arrest in interphase	1.73e-08	AASDHPPT,ABL1,AHR,AKAP12,AMACR,APOBEC3A,ATF2,ATF5,ATM,ATR,AURKA,BCL2,BHLHE40,BID,BMP2,BTG1,BTLA,BTRC,CALCR,CAMK1,CAMK2N1,CAMKK2,CASP9,CAV1,CBL,CCNB1,CCND2,CCND3,CCNG1,CD28,CDC25B,CDCA2,CDK2,CDK5RAP3,CDKN1B,CEBPA,CEBPD,CELF2,CKS2,CNDP2,COPS5,CRKL,CSF3,CTNNB1,CYP1B1,DAB2IP,DCX,DDIAS,DDIT3,DDX24,DESI2,DLX3,DTL,DUSP1,E2F3,E2F4,E2F5,E2F7,EGFR,ERG,ESR2,FAM168A,FBXL2,FHIT,FKBP1A,FN1,FOXA1,FOXO1,FOXO3,FO…	180
Molecular Transport	Secretion of molecule	1.81e-08	ABAT,ABCA1,ABCB4,ABCG1,ABCG5,ADAM9,ADRA2B,ADRA2C,AHI1,ALK,ALOX5,ANG,ANGPT2,APOC3,AQP7,ARFGAP3,ARL4D,ASIC1,BCL2,BDKRB2,BDNF,BMP2,BMP6,C1QTNF3,CACNA1E,CACNB4,CANX,CBLN4,CCK,CCN4,CD2AP,CD300A,CFL1,CHRNA6,CNR1,CPLX3,CREB1,CRH,CRHR2,CTNNB1,CX3CL1,CYP51A1,DNAJC5,DTNBP1,EDNRA,ERBB3,ERP29,ESR2,EZR,F2RL1,FABP1,FGA,FGF20,FGF7,FMO3,FMR1,FN1,FOXA2,FOXO1,FOXO3,FOXP3,FRMD4A,FST,FYN,FZD4,GABBR1,GAD2,GAL,GATA6,G…	206
Neurological Disease,Psychological Disorders	Schizophrenia	1.9e-08	ABAT,ACOT7,ADAMTS3,ADCY7,ADRA2B,ADRA2C,ADRB1,AKAP11,ANK3,APBA2,ATF2,ATXN1,BDNF,BMT2,C4A/C4B,CA1,CA3,CACNA1C,CACNA2D1,CACNA2D2,CALB1,CAP2,CAV1,CCK,CCND2,CDKN1B,CELF2,CHRM5,CHRNA6,CHRNA9,CNR1,CSMD1,CTNNA2,CTSB,CYP2D6,CYP3A5,DAB1,DAOA,DGCR2,DHFR,DICER1,DPYD,DTNBP1,DUSP1,EBF1,EGFR,ELAVL4,ERBB3,ESR2,ETFRF1,FNTA,FOLH1,FRRS1,FSHB,FXR2,GABRA2,GABRA3,GABRA5,GABRA6,GABRB1,GABRB2,GABRE,GABRP,GABRR1,GAD2,GAP…	181
Cell Death and Survival	Apoptosis of connective tissue cells	1.96e-08	ABL1,ABL2,AHR,APLN,ATF2,ATF3,ATF5,ATM,BAK1,BBC3,BCL2,BCL2L11,BID,BIRC2,BMP2,BMPR1A,BMPR1B,BNIP3,BTRC,CAPNS1,CASP9,CCDC47,CCDC80,CD1D,CDKN1B,CLIC4,CLU,CNR1,COPS5,CREB1,CREB3L2,CRKL,CTBP2,CTNNB1,CYCS,DAPK1,DDIAS,DDIT3,DDX58,DHCR24,DKK1,DMP1,DUSP1,EFNB2,EGFR,EIF2S1,FGA,FN1,FOXO1,GAB1,GABBR1,GNL3,GNPNAT1,HAS2,HGF,IGF1R,IKBKB,IL17A,IL1A,IL24,ITGAV,ITGB1,JUN,KHDRBS1,KRAS,LEP,MAP2K1,MAP2K3,MAP2K4,MAPK1,…	113
Cell Cycle	Interaction of DNA	1.96e-08	ABCD2,AHR,ALOX5,ANGPT2,ATF3,ATF7,ATM,BAG1,BARX2,BCAT2,BCL10,BCL2,BMP2,BMPR1A,BTRC,CAV1,CCN2,CD28,CDK2,CEBPA,CEBPD,CFL1,CLU,CREB1,CRH,CRIP2,CSF3,CTNNB1,CYP1B1,CYP2C9,CYP2D6,DDIT3,DDX58,DUSP26,EBF1,EGFR,EGR3,EPAS1,ESR2,ETS1,ETV3,FN1,FOXA1,FOXA2,FOXF2,FOXO1,FOXO3,FOXP3,FUS,FYB1,FZD6,GABPB1,GLRX,GTF2B,H3-3A/H3-3B,HCK,HDC,HGF,HMGB1,HOXA10,HOXA11,HOXA9,IKBKB,IL12B,IL17A,IL1A,IL6R,ISL1,ITGB2,JUN,KDR,KIT…	180
Cellular Movement	Invasion of squamous cell carcinoma cell lines	2e-08	BCL10,BDNF,CCN2,CLU,CSF3,CTSB,DSE,EZR,FN1,FOXP1,FSCN1,GALNT2,HBEGF,HGF,IFIT2,ITGAV,ITGB6,L1CAM,MMP9,MYCT1,NME1,NUMB,PLCG1,POSTN,PRKCI,RPS6KA3,SH3GLB2,SMAD7,SRC,STMN1,SULF1,TGFA,TP63,VEGFA,ZMPSTE24	35
Cell Cycle,Gene Expression	Binding of DNA	2.04e-08	ABCD2,AHR,ALOX5,ANGPT2,ATF3,ATF7,ATM,BAG1,BARX2,BCAT2,BCL10,BCL2,BMP2,BMPR1A,BTRC,CAV1,CCN2,CD28,CDK2,CEBPA,CEBPD,CFL1,CLU,CREB1,CRH,CRIP2,CSF3,CTNNB1,CYP1B1,CYP2C9,CYP2D6,DDIT3,DDX58,DUSP26,EBF1,EGFR,EGR3,EPAS1,ESR2,ETS1,ETV3,FN1,FOXA1,FOXA2,FOXF2,FOXO1,FOXO3,FOXP3,FYB1,FZD6,GABPB1,GLRX,GTF2B,H3-3A/H3-3B,HCK,HDC,HGF,HMGB1,HOXA10,HOXA11,HOXA9,IKBKB,IL12B,IL17A,IL1A,IL6R,ISL1,ITGB2,JUN,KDR,KITLG,K…	175
Cellular Development,Cellular Growth and Proliferation,Hair and Skin Development and Function,Organ Development,Tissue Development	Proliferation of dermal cells	2.23e-08	ANGPTL6,ATF2,BMP6,CCNG2,CDK2,CLU,CTNNA1,CTSV,DDX5,DSG4,E2F7,EFNB2,EGFR,EPHA2,ERBIN,ERN1,FGF10,FGF7,FST,FYN,HAS2,HGF,IL17A,IL36G,IRF6,ITGB1,JUN,KLF10,KLF4,KLF5,KRAS,LMNA,LRIG1,MAP2K4,MAP3K3,MAPK7,MAPK8,MAPK9,MAPKAPK2,MED1,MT3,NAB1,NR3C1,PAK1,PAK2,PAQR3,PKP1,PLCE1,PPP1R13L,PRKCI,PRKD1,PTAFR,PTEN,PTGER2,PTH,PTHLH,PTPRZ1,RARG,RNF7,SDR16C5,SMAD7,SNAI2,SRSF6,TAC1,TGFA,TGFB2,TP63,TRAIP,TRH,VIP,WNT16,YAP…	75
Psychological Disorders	Schizophrenia spectrum disorder	2.27e-08	ABAT,ACOT7,ADAMTS3,ADCY7,ADRA2B,ADRA2C,ADRB1,AKAP11,ANK3,APBA2,ATF2,ATXN1,BDNF,BMT2,C4A/C4B,CA1,CA3,CACNA1C,CACNA2D1,CACNA2D2,CALB1,CAP2,CAV1,CCK,CCND2,CDKN1B,CELF2,CELF6,CHRM5,CHRNA6,CHRNA9,CNR1,CSMD1,CTNNA2,CTSB,CYP2D6,CYP3A5,DAB1,DAOA,DGCR2,DHFR,DICER1,DPYD,DTNBP1,DUSP1,EBF1,EGFR,ELAVL4,ERBB3,ESR2,ETFRF1,FNTA,FOLH1,FOXP1,FRRS1,FSHB,FXR2,GABRA2,GABRA3,GABRA5,GABRA6,GABRB1,GABRB2,GABRE,GABRP,GAB…	190
Cancer	Cell transformation	2.3e-08	ABL1,ALK,ALKAL2,ARHGAP32,ARHGEF12,ARHGEF3,ASPH,ATF3,ATG12,ATM,AURKA,AURKB,BAG4,BAK1,BCL2,BCL2A1,BLK,BMP2,CAV1,CBL,CCN4,CCNA1,CCND2,CCND3,CCNE2,CDC25B,CDK2,CDK3,CDK6,CDKN1B,CEBPA,CHRM5,CHRNA9,CLU,CRK,CTNNB1,CXCL1,DAPK1,DCUN1D1,DCUN1D3,DICER1,DKK1,DLC1,ECT2,EGFR,EIF2S1,EPHA2,EPS8,ERBB3,ERG,ERRFI1,ESR2,ETS1,EYA1,FER,FGF10,FGF20,FGF4,FGF7,FOXO3,FRS2,FYN,GAB1,GAB2,GNA13,GNAQ,GRB10,GRB2,GRM1,H2BC9,HAS2…	179
Psychological Disorders	Schizophrenia or schizoaffective disorder	2.35e-08	ABAT,ACOT7,ADAMTS3,ADCY7,ADRA2B,ADRA2C,ADRB1,AKAP11,ANK3,APBA2,ATF2,ATXN1,BDNF,BMT2,C4A/C4B,CA1,CA3,CACNA1C,CACNA2D1,CACNA2D2,CALB1,CAP2,CAV1,CCK,CCND2,CDKN1B,CELF2,CHRM5,CHRNA6,CHRNA9,CNR1,CSMD1,CTNNA2,CTSB,CYP2D6,CYP3A5,DAB1,DAOA,DGCR2,DHFR,DICER1,DPYD,DTNBP1,DUSP1,EBF1,EGFR,ELAVL4,ERBB3,ESR2,ETFRF1,FNTA,FOLH1,FRRS1,FSHB,FXR2,GABRA2,GABRA3,GABRA5,GABRA6,GABRB1,GABRB2,GABRE,GABRP,GABRR1,GAD2,GAP…	182
Embryonic Development,Nervous System Development and Function,Organ Development,Organismal Development,Tissue Development	Formation of cerebellum	2.5e-08	ABL1,ABL2,AHI1,ATXN1,BCL2,BCR,BDNF,CCND2,CDK5R1,CDK5R2,CLP1,CNTN1,DIO3,DIXDC1,FGF10,FGF9,FOXA2,FOXC1,FOXP2,FYN,GLI3,IGF1R,KHDRBS1,KHDRBS2,KIF14,L1CAM,LHX1,LMX1A,LMX1B,LRP6,MAP2K1,MDM4,MYO16,NEUROD1,NEUROD4,NFIA,NLGN4X,NPAS3,NRCAM,OGDH,OTX2,PAX5,PAX6,POU3F3,PTEN,PURA,RBFOX2,RELN,RERE,RORA,SLC17A6,SRC,TRNP1,TTBK2,TTC21B,VLDLR,ZBTB18,ZIC2,ZNF423	59
Cell-To-Cell Signaling and Interaction	Interaction of tumor cell lines	2.53e-08	ADAM10,ADAM17,ADAM9,ADD3,AKAP12,ALCAM,ARHGAP21,ATF2,BCL10,CAV1,CBL,CCL3,CCN3,CD151,CD226,CD274,CD28,CD47,CD80,CDHR3,CHST6,CLEC4G,CNTFR,CRK,CSK,CTNNB1,CTSB,CTTN,CX3CL1,CXADR,CXCL2,CXCL9,DAB2,DNMT3B,DSE,DSG2,EFEMP1,EGFR,EGR3,EPHA2,ERBB3,ERP29,ESM1,ETS1,EZR,FGA,FN1,FOXO1,FOXP1,FXYD5,FYB1,FYN,GAL3ST1,GJA3,GNA13,GOLPH3,GPC3,GPNMB,GRIA4,HAS2,HCK,HES1,HGF,HMGB1,HS3ST3B1,IGF1R,IL17A,IL1R2,IL6R,IRS1,ITGA6…	168
Cardiovascular Disease	Disorder of blood pressure	2.54e-08	ABCB4,ABCC8,ABL1,ACE2,ACTR5,ADAMTS4,ADCY6,ADGRF5,ADRA2B,ADRA2C,ADRB1,AHR,AKAP12,ALDH8A1,ALKBH3,ANGPT2,ANKRD27,ANKRD55,APLN,APLNR,APOBEC3B,ARHGEF10,ARL8B,ASIC1,ASPN,ATP2B4,ATP2C1,BDKRB2,BMP2,BMPR1A,BMPR1B,BZW1,CA1,CA3,CACNA1C,CACNA2D1,CACNA2D2,CACNB1,CACNB2,CACNB4,CANX,CAV1,CCDC117,CCDC6,CCDC85A,CCNY,CHRM5,CHRNA6,CHRNA9,CIART,CLIC5,CMTM7,CNR1,CRHR2,CSTF2T,CTTN,CX3CL1,CXCL1,CXCL11,CYB561,CYP3A5,DCH…	292
Cell Morphology,Cellular Function and Maintenance	Length of cells	2.58e-08	ABL1,ARC,ATM,BDNF,BMP2,BMPR1A,CD2AP,CTNND2,DCX,DIXDC1,DTNA,EIF4EBP2,EPHA7,ESR2,FER,FMR1,FYN,GAL,GAL3ST1,GDI1,GDNF,GRIP1,HGF,JAM3,KALRN,KATNA1,MAPK10,MET,MSN,NEB,NRAS,NTF3,OPHN1,PAFAH1B1,PAK1,PCYT1B,PFN2,PLAU,PMP22,RAC1,RAP2A,RCAN1,RHOA,RICTOR,ROCK1,SIN3A,SOX11,SPAST,TGFBR1,UBE3A,VEGFD,VSTM5,WNT5A	53
Skeletal and Muscular System Development and Function	Function of muscle	2.65e-08	ACE2,ACVR2B,ADCY6,ADRB1,AKAP5,APLN,APLNR,ASPH,ATP5IF1,BDNF,BIRC2,CACNA2D1,CACNB1,CAV1,CAV2,CAV3,CCN3,CD47,CLU,COL13A1,CREG1,CRHR2,CSRP3,CTSV,DMPK,DNAJC5,DOCK1,DTNBP1,DUSP1,EDNRB,EFEMP1,EFNA1,ESR2,F2RL1,FKBP1A,FOXO1,FST,FZD4,GAB1,GAB2,GAS2L3,GATA4,GATA6,GPCPD1,GUCY1A1,HAND2,HBEGF,HCN1,HCN3,HEYL,HIF1AN,HOMER1,HOXA9,HTR1B,IGF1R,IKBKB,IL6ST,INHBA,IRAG1,ITGB1,KCNJ2,KCNMB1,KLF5,LAMP2,LEP,LIMS1,LMNA,LRR…	132
Nervous System Development and Function,Organ Morphology,Organismal Development	Morphology of forebrain	2.75e-08	ABI2,ADGRA2,ALK,AP4E1,APBB2,ARL6,ATXN1L,B2M,BAG6,BDNF,BHLHE22,CASP9,CAV1,CDK5R1,CDKN1B,CELSR2,CHL1,CLCN3,CNR2,CPEB4,DAB1,DICER1,DKK1,DLX5,E2F5,EBF1,EFNA5,EGFR,EPHA4,ERBB3,FOXA2,FOXO3,FRMD4A,FSCN1,FYN,FZD3,GAP43,GCLM,GDNF,GLI3,GPM6B,GSX2,HDC,HES1,ITPR1,JUN,KIF2A,KLF4,KLF7,L1CAM,LAMP2,LHX1,LHX2,LIF,LYNX1,MAPK7,MECOM,MYH10,NCAM2,NDN,NDST1,NDST3,NFIA,NFIB,NOG,NPAS3,OCLN,OPHN1,OTX2,PAFAH1B1,PAX6,PCP4,…	106
Carbohydrate Metabolism	Synthesis of carbohydrate	2.91e-08	ABCC8,ADCYAP1R1,AGPAT4,AGPAT5,AJUBA,ALG2,APLN,APLNR,APPL1,AQP9,ASPN,B3GALNT1,B3GALT2,B3GALT6,B3GAT2,B3GNT2,B3GNT7,B4GALNT1,B4GALT4,B4GALT6,B4GAT1,BDKRB2,C1QL3,CAMKK2,CCN2,CCND3,CEBPA,CHPF2,CHPT1,CHST1,CHST11,CHST6,CHST9,CNKSR1,CPNE3,CRH,CTNNB1,DBI,DDHD2,DGKA,DGKQ,DSE,EPM2A,EPM2AIP1,EXT1,EXTL3,F2RL2,FGF7,FITM2,FOXA2,FOXO1,GAL,GBE1,GNA14,GNAI1,GNAQ,GNE,GNG2,GNPDA1,GNPNAT1,GPAM,GPC1,GPC2,GPC3,GPD1L,…	193
Organismal Development,Reproductive System Development and Function	Development of reproductive system	2.92e-08	ABCA1,ABL1,ACVR1,ADRA2B,ADRA2C,AFF4,AGFG1,AHR,APLN,APRT,AQP8,ARHGEF12,ARID4B,ARID5B,ARL4A,ASZ1,ATAT1,ATM,AURKC,B4GALNT1,BAG6,BAK1,BCL2,BCL2L10,BCL2L11,BIRC2,BMP5,BMP6,BNC1,BOLL,BPY2 (includes others),BTRC,C14orf39,CAMK4,CAV1,CBL,CCN2,CCNA1,CCND2,CCNE2,CCNYL1,CDK2,CDK6,CDKN1B,CDKN2C,CDO1,CDX4,CEBPA,CEBPD,CEP57,CHD7,CITED2,CLOCK,CNBD2,CNOT7,CNTD1,CPEB1,CREB1,CRKL,CRTAP,CSN2,CSTF2T,CTNNB1,CUZD1,DDIA…	293
Cardiovascular Disease,Cardiovascular System Development and Function,Cell Morphology,Organ Morphology,Organismal Development,Organismal Injury and Abnormalities	Hypertrophy of heart cells	2.92e-08	ADRB1,ANGPT2,CAV1,CAV3,CSF3,CSRP3,CTSB,CTSC,CTSD,DICER1,DNAJC3,DTNBP1,DUSP1,EGFR,EPAS1,FOXO3,GAL,GAS2L3,GATA4,GATA6,GNAQ,H2AZ1,HAND2,HBEGF,HCK,HPRT1,HTR2C,INHBA,JUN,KCND2,LEP,LIF,MAP2K3,MAP2K4,MAP2K7,MAPK1,MAPK7,MAPK8,MEF2C,MMP9,MTOR,NOX4,PLAU,PLCE1,PPP3CA,PRKAA1,PTEN,RAB1A,RAB2A,SHC1,SIRT1,SMAD7,SP3,TBX5,TNFAIP3,TRPC6,USP18,YAP1	58
Cancer,Organismal Injury and Abnormalities	Liquid tumor	3.09e-08	ABCB4,ABCG5,ABL1,ABL2,ACAD11,ACSM3,ACSM6,ADAM10,ADAM17,ADAM7,ADAMTS3,ADCY7,ADCYAP1R1,ADD3,ADGRB3,ADGRL2,ADRA2C,ADRB1,AGAP5 (includes others),AGL,AHI1,AIFM1,AKAP11,ALG10B,ALK,AMMECR1,ANAPC1,ANK3,ANKFY1,ANKHD1/ANKHD1-EIF4EBP3,ANKIB1,ANKRD36,ANKS1B,APLNR,AQP7,ARHGAP6,ARID2,ARID3A,ARID4B,ARID5B,ARIH1,ART3,ATF7IP,ATL1,ATM,ATP2B4,ATP6V0D2,ATR,ATRNL1,ATXN1,AURKA,AURKB,B2M,B4GALNT1,BAALC,BACH2,BAG1,BAK1,…	663
Cancer,Endocrine System Disorders,Organismal Injury and Abnormalities,Reproductive System Disease	Ovarian tumor	3.1e-08	ABAT,ABCA1,ABCA8,ABCC8,ABHD2,ABL1,ACAD11,ACE2,ACP3,ACP5,ACTR2,ADAM10,ADAM17,ADCYAP1R1,ADGRB3,ADGRF5,ADIPOR2,AGBL4,AGL,AHRR,AIFM1,AK3,AKR1C1/AKR1C2,AKTIP,ALCAM,ALK,ALKBH3,ALS2,ANG,ANGPT2,ANKIB1,ANKRD36,ANKRD50,ANKRD52,ANKRD55,ANLN,ANXA8/ANXA8L1,ARHGAP32,ARHGEF12,ARHGEF18,ARID2,ARID5B,ARMC9,ATAD2,ATG2B,ATM,ATP8A1,ATR,AURKB,B2M,B3GALNT1,BAG6,BAHD1,BAP1,BBS10,BCL10,BCL2,BCL2L11,BCR,BMP2K,BNC1,BOD1L1,…	628
Cellular Development,Tissue Development	Differentiation of epithelial cells	3.13e-08	ABL1,ABL2,ADAM9,AKR1C1/AKR1C2,ARHGAP19,AURKB,BCL2,BCR,BLOC1S6,BMP2,CAV1,CDC25B,CDK2,CDKN1B,CERS3,CLIC4,CNN3,COMMD5,CRHR2,CSTA,CTNNB1,CTNND1,CTSB,CTSV,DLX3,DLX5,DSG4,E2F7,EDNRB,EOMES,EPHA2,ERRFI1,FBXW7,FGF10,FGF4,FGF7,FGF9,FN1,FOXA1,FOXA2,FOXC1,FYN,FZD1,GAB1,GATA4,GATA6,GLI3,GNA11,GNAQ,GRHL2,HES1,IGF1R,IL24,IRF6,ITGB1,IVL,KEAP1,KITLG,KLF4,KLF5,KLF7,KRAS,LIF,LMX1A,LPIN1,LRIG1,MAFF,MAFG,MAP2K1,MAPK8…	131
Developmental Disorder,Neurological Disease	Neurodevelopmental disorder	3.27e-08	AARS1,ABAT,ADRA2B,ADRA2C,AP3B2,ARHGEF2,BDNF,CACNA1E,CACNA2D2,CCR9,CDKN1B,CHD7,CNPY3,CTNNA2,CYP2C19,DDC,DPYD,DSCAM,EBF3,EDNRB,EXTL3,FARSB,FOXC1,FOXF1,FOXF2,FOXP1,FRRS1L,GABBR1,GABRA2,GABRA5,GABRB1,GDNF,GLI3,GLS,GNAQ,GRIA4,GRIN2B,GSX2,GTPBP2,HCN1,HECW2,HNRNPU,HTR1A,HTR1B,HTR1F,HTR2A,HTR2B,HTR2C,HTR4,IRAK3,KCNA2,KCNB1,KDR,KIF2A,KIF5C,L1CAM,LDLRAD4,MAP2K1,MEF2C,MTHFS,MTOR,NECAP1,NR3C1,NRG3,NRXN1,NTF3…	105
Nervous System Development and Function,Organ Morphology,Organismal Development	Morphology of rhombencephalon	3.27e-08	ABCD2,ADAMTS4,AHI1,AKAP12,ALS2,ANK3,ATM,ATXN1,B4GALNT1,BCR,CACNA2D2,CALB1,CAMK4,CASP9,CCND2,CDK5R1,CDK5R2,CDKN1B,CDKN2C,CNTN1,CTNNA2,CTSB,EBF1,EGFR,EI24,EPB41L2,EPM2A,ERBB3,FMR1,FOXA2,FUBP1,GLB1,GLI3,GMFB,GRID2,HEXB,HOXA1,IKBKB,KHDRBS1,KHDRBS2,KIF14,KIF2A,L1CAM,LIF,LMX1B,LYNX1,MAPK8IP1,MARVELD1,MDM4,MYH10,NEUROD1,NEUROD4,NFIA,NRCAM,OCLN,OSTM1,OTX2,PAFAH1B1,PIANP,POMGNT1,PTEN,PURA,RARG,RASA1,RICTO…	78
Cardiovascular System Development and Function,Cellular Movement	Movement of vascular endothelial cells	3.27e-08	ACKR3,ANGPT2,ATF2,BDNF,CAVIN2,CD151,CDKN1B,CSF3,CXCL1,DGKA,DICER1,DIP2A,DKK1,DLC1,DMP1,DOCK1,EFNA1,EFNB2,EGFR,EGR3,F2RL1,FN1,FOXC1,FOXC2,FOXO1,FOXO3,FRS2,FSTL1,GAB1,GATA6,GNA11,HGF,HOXA9,IL17A,ITGB1,KDR,KLHL20,KMT2A,LEP,LOX,MAPKAPK5,MEOX2,MMP9,MTSS1,NCL,NDP,NEU1,NR4A1,NR4A2,NRP1,NUS1,PIK3C2A,PLAU,PLPP3,PRKAA1,PROS1,PTPRZ1,RAC1,RCAN1,RECK,RHOA,ROBO2,RTN4,SDC4,SELE,SEMA3E,SLIT2,SPRY4,SRC,STARD13,TA…	78
Cardiovascular System Development and Function,Cell Morphology,Organ Morphology,Organismal Development	Enlargement of heart cells	3.3e-08	ADRB1,ANGPT2,CAV1,CAV3,CSF3,CSRP3,CTSB,CTSC,CTSD,DICER1,DNAJC3,DTNBP1,DUSP1,EGFR,EPAS1,FOXO3,GAL,GAS2L3,GATA4,GATA6,GNAQ,H2AZ1,HAND2,HBEGF,HCK,HPRT1,HTR2C,INHBA,JUN,KCND2,KLF4,LEP,LIF,MAP2K3,MAP2K4,MAP2K7,MAPK1,MAPK7,MAPK8,MEF2C,MMP9,MTOR,NOX4,PLAU,PLCE1,PPP3CA,PRKAA1,PTEN,RAB1A,RAB2A,SHC1,SIRT1,SMAD7,SP3,TBX5,TNFAIP3,TRPC6,USP18,YAP1	59
Hematological Disease	Cyanosis	3.3e-08	ACKR3,ACVR2B,ADAM17,ADRA2B,ATF2,ATXN1L,CAPRIN1,COL25A1,DOCK1,EGFR,EIF4E2,EPAS1,EPHA3,ERBB3,ERRFI1,FGF9,FST,FSTL1,GSKIP,GSX2,HOXA1,HOXA5,IGF1R,JAM3,KCNJ2,KIF5A,KLF7,LOX,LPL,MAFB,MAN1A2,MEOX1,MEOX2,MN1,MYOG,NDN,NDST1,NPAS3,OLIG3,PBX3,PDPN,PITX2,PRRX1,PTHLH,RHOT1,RPS6KB1,RPS6KB2,RSPO2,RUNX2,SCN2A,SLC17A6,SLC5A3,SPAG17,TBX1,TGFB2,USP1,VEGFA,XRCC2,YWHAE	59
Cellular Movement	Invasion of carcinoma cell lines	3.87e-08	ADAM10,ADAM9,ALCAM,ATF1,AURKA,BCL10,BDNF,CAPNS1,CAV1,CCN2,CCN3,CCN4,CDK14,CLU,CRMP1,CSF3,CTBP2,CTNND1,CTSB,DDX58,DKK1,DLC1,DNAJB4,DNMT3B,DOCK4,DSE,DUSP1,ECT2,EGFR,ENAH,EPAS1,ERBB3,EZR,FHIT,FHOD1,FN1,FOXF1,FOXF2,FOXP1,FSCN1,GALNT2,GNAI1,HBEGF,HGF,IFIT2,IRF6,ITGAV,ITGB1,ITGB6,JUN,KLF4,KRAS,L1CAM,LEP,LGR4,LTB4R2,MAP2K4,MAPK1,MAPK6,MET,MITF,MMP9,MTOR,MUC1,MYCT1,NANOS1,NME1,NUAK1,NUMB,PAK1,PHIP,PLCG1,…	111
Cellular Development,Cellular Growth and Proliferation,Nervous System Development and Function,Tissue Development	Growth of axons	3.88e-08	AATK,APBB2,B4GALNT1,BCL2,BDNF,CCK,CDK5R1,CDK5R2,CELF2,COTL1,CREB1,CRMP1,DCX,DIXDC1,DLX5,DUSP10,DUSP13,EEA1,ELAVL4,EXT1,EZR,GAP43,GDAP1,GDNF,GPHN,GPM6A,HGF,IGF1R,IMPA1,ISL1,KATNA1,KIF23,KIF2A,KLF4,KLF7,L1CAM,LIF,MAOA,MESP2,MT2A,MTOR,NEU3,NFIA,NRG1,NRN1,NRP1,NTF3,PIK3CA,PLPPR4,PTEN,PTP4A2,RAC1,RASA1,RHOA,RIMS4,RIT1,ROCK2,RTN4,SEMA3F,SIRT1,SKIL,SLIT2,SNAP25,ST8SIA1,STK38L,STX7,SYN3,THAP1,TMOD2,TSC1,…	77
Cellular Movement,Connective Tissue Development and Function	Cell movement of fibroblast cell lines	4e-08	ACTR2,ADI1,APPL1,ARHGEF12,ATG12,ATG9A,CDKN1B,CLIC4,CNN3,CRKL,CSK,CTNNB1,CTTN,DAB2,DLC1,DOCK4,EFEMP1,EFNA1,EGFR,ELK3,EPHA2,ERG,FBXW7,FGF4,FN1,FOXC2,FOXF1,FSCN1,GAB1,GAP43,GIT2,GNA11,GNA13,GNG12,GPC1,GRB2,HAS2,HBEGF,HCK,HGF,HMGB1,ITGB1,LOX,LPAR1,MAPRE1,MEOX2,MET,MGAT5,MTSS1,MYLK,NCK2,NDST1,NOX4,NRAS,NRCAM,PAK1,PALLD,PDGFD,PDGFRA,PIK3R1,PLAU,PMP22,PPP1R9B,PPP2R5C,PRKD1,PTEN,PTPN12,RAC1,RANBP9,RASA1,…	83
Cancer,Neurological Disease,Organismal Injury and Abnormalities	Anaplastic glioma	4.05e-08	ABAT,ABCA8,ABL1,ADGRB3,ADGRE5,AJUBA,AKAP12,ALCAM,ANGPT2,ARF4,ARID5B,ATM,ATR,ATXN1,BAP1,BCAS1,BCL2L12,BCL2L13,BDKRB2,CAP2,CASP2,CAV1,CCL3,CCND2,CD200,CD274,CDK3,CDKN1B,CDKN2C,CDKN3,CKS2,CLU,COL4A2,CTNNB1,CXADR,CXCL1,CXCL9,CYCS,DDX60L,DHFR,DOCK1,DTNA,DYNC1I1,ECT2,EFEMP1,EFNA5,EGFR,EGR3,ELMO1,ENTPD4,EPHA2,EPHA3,FAM111A,FBXW7,FN1,FOLH1,FOXA1,FOXO3,FRMD4B,FRRS1,GABRA2,GAD2,GAP43,GLB1,GPNMB,GPR158,H3-3…	173
Cellular Movement	Migration of breast cancer cell lines	4.22e-08	ADAM9,ADGRF5,AHR,ANGPT2,ARRDC3,ATF3,ATOX1,BHLHE41,BMP2,BMP6,CAV1,CCDC88A,CCN2,CDKN1B,CEBPD,CERS6,CNR2,CPNE3,CRK,CTDSP1,CTNNB1,CTTN,CXCL11,CXCL9,DLC1,DNAJB6,EFNA5,EGFR,EMP1,ENAH,EPHA2,ERBB3,ESR2,ETS1,EYA1,FER,FGF10,FGF7,FHOD1,FN1,FNBP1L,FOXA1,FOXC1,FOXF2,FOXO3,FOXP3,FSIP1,GAB1,GAB2,GNA11,GOLPH3,HGF,HOXA11,HSP90AA1,IGF1R,IL19,ITGA6,ITGAV,ITGB1,JUN,KCNN3,KHDRBS1,KLF4,LASP1,LEP,LMO7,MAP2K1,MAP2K7,MAP…	131
Cancer,Gastrointestinal Disease,Organismal Injury and Abnormalities	Pancreatobiliary tumor	4.24e-08	AAK1,AATK,ABCB10,ABCB4,ABL1,ABRA,ACE2,ACKR3,ACO1,ACOXL,ACSF2,ACSM3,ACSM5,ACSM6,ACY1,ADAM10,ADAM17,ADAM9,ADAMTS18,ADAMTS3,ADCYAP1R1,ADGRB3,ADGRE1,ADGRL2,ADRA2B,ADRA2C,AFF4,AGBL4,AGL,AGO1,AGPAT4,AGPAT5,AHR,AJAP1,AKAP11,AKAP5,AKR1C1/AKR1C2,ALK,ALKBH3,ALS2,ANK3,ANKHD1/ANKHD1-EIF4EBP3,ANKMY2,ANKRD44,ANKRD52,ANKZF1,ANP32E,AOC2,AP3B2,AP3S1,AP4E1,APCDD1L,APLNR,APOBEC3A,APPL1,ARHGAP32,ARHGEF10,ARHGEF12,AR…	944
Embryonic Development,Organismal Development,Tissue Development	Growth of embryonic tissue	4.63e-08	ADRA2B,BDNF,BMP2,BMP6,BMPR1A,CASP9,CDKN1B,CDKN2C,CLU,CNR1,CNR2,CTNNA1,CTNNB1,CX3CL1,DAGLA,DKK1,EED,EPAS1,F2RL1,FGF10,FGF4,FGF7,FGF9,FMR1,FOXF1,FOXG1,FOXP2,FRS2,FZD3,GAB2,GAP43,GDPD5,GLI3,GREM1,HAND2,HDAC7,HES1,HGF,HTR4,ID4,INHBA,IRS1,IRS2,ISL1,ITGA1,ITGA6,ITGB1,KCTD11,KDR,KITLG,KLF4,LEP,LIF,LMNA,LPAR1,LRP6,MAPK8,MCPH1,MMP9,MXD3,MYF6,NCL,NDN,NEIL3,NEUROD4,NPAS3,NR4A3,NRG1,NUMB,PAFAH1B1,PAX6,PITX2,…	106
Hematological Disease,Immunological Disease	B-cell lymphoproliferative disorder	4.85e-08	ABCG1,ABL1,ABL2,ACAD11,ACP5,ADAM7,ADAM9,ADD3,ADGRB3,ADGRF5,ADGRL2,ADRB1,AGBL4,AGL,AHR,AKAP11,AKAP5,ALK,ALOX5,AMACR,ANKRD36,ANKRD50,APOBEC3A,APOBEC3B,ARHGAP17,ARID2,ARID5B,ARMC9,ATF3,ATF7IP,ATM,ATP6V0D2,ATR,ATRNL1,ATXN1,ATXN3,AURKA,B2M,BACH2,BAK1,BAZ2B,BBC3,BCL10,BCL2,BCL2L10,BCL2L11,BDNF,BLNK,BNC2,BOD1L1,BRD3,BTG1,BUB3,C1QTNF7,C5orf22,CALD1,CASP2,CASP9,CAV1,CAV3,CAVIN2,CBFA2T3,CBL,CBX2,CCDC172,CC…	505
Cardiovascular Disease,Developmental Disorder	Congenital anomaly of cardiovascular system	5.07e-08	ABL1,ACKR3,ACVR2B,ADAM17,ADAMTS3,ADRA2B,ADRA2C,ADRB1,ANGPT2,CACNA1C,CAV3,CC2D2A,CCNE2,CCNH,CCP110,CDK13,CDK2,CHD7,CITED2,CRKL,CSRP3,CYP51A1,DCTN5,DICER1,DLC1,DNMT3B,DOCK1,DTNA,EDNRA,EDNRB,EGFR,EYA1,FGF10,FKBP1A,FOXC2,FOXF1,FOXO1,FZD4,GATA4,GATA6,GNAQ,GNG5,GPC3,HAAO,HAND2,HECTD1,HTR2A,HTR2B,HTR2C,IDH2,IL17RD,ISL1,JMJD6,JUN,KCNE2,KCNJ2,KCNJ5,KDM5A,KDR,KRAS,KYNU,LIN28A,LOX,LRRC6,MAP4K4,MAPK7,MEF2C,M…	129
Cell Morphology,Cellular Function and Maintenance,Nervous System Development and Function,Tissue Morphology	Length of neurons	5.21e-08	ABL1,ARC,ATM,BDNF,BMP2,BMPR1A,CD2AP,CTNND2,DCX,DIXDC1,EIF4EBP2,EPHA7,ESR2,FER,FMR1,GAL,GAL3ST1,GDI1,GDNF,GRIP1,HGF,JAM3,KALRN,KATNA1,MAPK10,MET,MSN,NTF3,OPHN1,PAFAH1B1,PAK1,PCYT1B,PFN2,PLAU,RAC1,RAP2A,RCAN1,RHOA,RICTOR,ROCK1,SIN3A,SOX11,SPAST,TGFBR1,UBE3A,VEGFD,VSTM5,WNT5A	48
Cell Cycle	M phase of cervical cancer cell lines	5.33e-08	AKAP12,ANLN,AURKA,CD2AP,CUEDC2,DCTN3,ECT2,GNAI1,GNAI3,KIF13A,KIF14,KIF20B,KIF23,LMNA,MAP2K1,NCAPD2,NEK7,OCRL,PI4KB,PIN1,RAB35,RAC1,RASSF1,RGS14,RHOA,SEPTIN6,SEPTIN7,SEPTIN9,SLC20A1,SPART,SPDL1,SSRP1,STX16,TERF1,TOP2A,TOP2B,TTC19,UBAP2L,ZFYVE26	39
Cancer,Neurological Disease,Organismal Injury and Abnormalities	Glioblastoma	5.39e-08	ABCA8,ABL1,ADGRB3,ADGRE5,AJUBA,AKAP12,ALCAM,ANGPT2,ARF4,ARID5B,ATM,ATR,ATXN1,BAP1,BCAS1,BCL2L12,BCL2L13,BDKRB2,CAP2,CASP2,CAV1,CCL3,CCND2,CD200,CD274,CDK3,CDKN1B,CDKN2C,CDKN3,CKS2,CLU,COL4A2,CTNNB1,CXADR,CXCL1,CXCL9,CYCS,DDX60L,DOCK1,DTNA,DYNC1I1,ECT2,EFEMP1,EFNA5,EGFR,EGR3,ELMO1,ENTPD4,EPHA2,EPHA3,FAM111A,FBXW7,FN1,FOLH1,FOXA1,FOXO3,FRMD4B,FRRS1,GABRA2,GAP43,GLB1,GPNMB,GPR158,H3-3A/H3-3B,HGF,HLF…	168
Cancer,Gastrointestinal Disease,Organismal Injury and Abnormalities	Gastroesophageal adenocarcinoma	5.44e-08	A4GNT,ABCA1,ABCA8,ABCC8,ABL1,ACO1,ACSF2,ACVR1,ADAM7,ADAMTS18,ADCK1,ADD3,ADGRB3,ADGRL2,AGBL4,AGO1,AHRR,AJAP1,AKNAD1,ALK,ALS2,AMMECR1L,ANAPC1,ANGPT2,ANK3,ANLN,AP2A2,AP3M2,APBA2,APCDD1L,ARHGAP32,ARHGEF18,ARID2,ARID3A,ARID5B,ASCC1,ASIC1,ATM,ATP2C1,ATP5F1B,ATP6V0A2,ATP8A1,ATR,B2M,B4GALNT1,BACE2,BCAP29,BCL2,BDNF,BDP1,BEND7,BHLHE22,BLK,BMP2K,BNC2,BOD1L1,BRD9,BRINP2,BSN,C11orf54,C11orf88,C14orf39,C1orf11…	532
Cardiovascular System Development and Function,Cellular Movement	Migration of vascular endothelial cells	5.53e-08	ACKR3,ANGPT2,ATF2,BDNF,CAVIN2,CD151,CDKN1B,CSF3,CXCL1,DICER1,DIP2A,DKK1,DLC1,DMP1,EFNB2,EGFR,EGR3,F2RL1,FN1,FOXC1,FOXC2,FOXO1,FOXO3,FRS2,FSTL1,GAB1,GATA6,GNA11,HGF,HOXA9,IL17A,ITGB1,KDR,KLHL20,KMT2A,LEP,LOX,MAPKAPK5,MEOX2,NCL,NDP,NEU1,NR4A1,NR4A2,NRP1,NUS1,PIK3C2A,PLAU,PLPP3,PRKAA1,PROS1,PTPRZ1,RAC1,RCAN1,RECK,RHOA,ROBO2,RTN4,SDC4,SELE,SEMA3E,SLIT2,SPRY4,SRC,STARD13,TAB2,TEAD4,TNFSF15,USP18,VEGFA…	71
Cancer,Organismal Injury and Abnormalities	Blastoma	5.53e-08	ABCA8,ABL1,ADGRB3,ADGRE5,AJUBA,AKAP12,ALCAM,ANGPT2,ARF4,ARID5B,ATM,ATR,ATXN1,BAP1,BCAS1,BCL2L12,BCL2L13,BDKRB2,CAP2,CASP2,CAV1,CCL3,CCND2,CD200,CD274,CDK3,CDKN1B,CDKN2C,CDKN3,CKS2,CLU,COL4A2,CTNNB1,CXADR,CXCL1,CXCL9,CYCS,DDX60L,DICER1,DOCK1,DTNA,DYNC1I1,ECT2,EFEMP1,EFNA5,EGFR,EGR3,ELMO1,ENTPD4,EPHA2,EPHA3,FAM111A,FBXW7,FN1,FOLH1,FOXA1,FOXO3,FRMD4B,FRRS1,GABRA2,GAP43,GLB1,GPNMB,GPR158,H3-3A/H3-3B,…	171
Neurological Disease,Skeletal and Muscular Disorders	Neuromuscular disease	5.59e-08	ABL1,ACTA1,ADAM10,ADAM17,ADCY7,ADRA2B,ADRA2C,ADRB1,AFG3L2,AHCYL1,ALCAM,ALG2,ALOX5,AP1S2,APLNR,ARHGAP32,ARPP19,ASIC1,ATP2C1,ATP5MG,ATP6AP2,ATXN1,B2M,B3GNT2,B4GALNT1,B4GALT6,B4GAT1,BAG6,BASP1,BCAS1,BCL2,BCR,BDNF,BHLHE40,BIRC2,C4A/C4B,CA3,CACNA1C,CALB1,CAMK4,CAMKK2,CANX,CASP2,CASP9,CCN2,CD160,CD47,CD52,CD80,CDK5R1,CDR1,CEP170B,CHAF1B,CHP1,CHRM5,CLU,CNR1,CNR2,COL13A1,COX7B,COX7C,CREB1,CTNNB1,CTSB,CX3…	346
Organismal Development,Skeletal and Muscular System Development and Function	Morphology of limb	5.74e-08	ACVR2B,AKAP11,ARID5B,ATL1,BMPR1B,CACNB1,CAPNS1,CBX2,CCN2,CCN3,CCP110,CD47,CD80,CDK20,CDO1,COL13A1,COL9A1,CREB3L2,CYP51A1,DKK1,DMP1,DNAJC21,EGLN3,ERRFI1,ESR2,EVX2,FGF10,FST,FSTL1,GDAP1,GHRHR,GLI3,GPC3,HAND2,HELLS,HEXB,HIF1AN,HOXA10,HOXA11,HOXA9,HOXB5,HOXC13,HOXD10,HOXD13,HTR4,IGF1R,IL6ST,INHBA,IRAK3,IRS1,ITGA6,ITGB1,KLF10,LEP,LMBR1,LMX1B,LRP4,LRP6,MDM4,MED1,MEOX2,MMP16,MMP9,MSTN,MTM1,MTOR,NOG,NPFF…	121
Cellular Assembly and Organization	Organization of organelle	5.78e-08	A4GALT,ABCA1,ABL1,ABL2,ADAM10,ADGRL2,AFG3L2,AGFG1,AKTIP,ALS2,ANG,ANK3,ANXA8/ANXA8L1,ARF4,ARHGAP12,ARHGAP17,ARHGAP21,ARHGAP6,ARHGEF2,ATL1,ATL2,ATP5F1B,ATR,AVIL,BAG5,BCL2,BLZF1,BNC1,BNIP3,BSN,C1QL3,CADM2,CAMK1,CAV1,CAV2,CAV3,CBLN2,CCDC47,CD2AP,CDCA8,CDH11,CDH7,CEBPA,CERT1,CFL1,CFL2,CHMP1A,CHMP1B,CHMP2B,CHMP4A,CHMP7,CHP1,CLASP1,CLN5,CLVS1,COG2,COG3,CRHR2,CRIPT,CSRP3,CTNNA1,CTNNB1,CTNND1,CTNND2,CXADR…	245
Cancer,Hematological Disease,Immunological Disease,Organismal Injury and Abnormalities	B-cell neoplasm	6.15e-08	ABCG1,ABL1,ABL2,ACAD11,ACP5,ADAM7,ADAM9,ADD3,ADGRB3,ADGRF5,ADGRL2,ADRB1,AGBL4,AGL,AHR,AKAP11,AKAP5,ALK,ALOX5,AMACR,ANKRD36,ANKRD50,APOBEC3A,APOBEC3B,ARHGAP17,ARID2,ARID5B,ARMC9,ATF3,ATF7IP,ATM,ATP6V0D2,ATR,ATRNL1,ATXN1,ATXN3,AURKA,B2M,BACH2,BAK1,BAZ2B,BBC3,BCL10,BCL2,BCL2L10,BCL2L11,BDNF,BLNK,BNC2,BOD1L1,BRD3,BTG1,BUB3,C1QTNF7,C5orf22,CALD1,CASP2,CASP9,CAV1,CAV3,CAVIN2,CBFA2T3,CBL,CBX2,CCDC172,CC…	504
Lipid Metabolism,Small Molecule Biochemistry	Synthesis of lipid	6.18e-08	A4GALT,ABAT,ABCA1,ABCA2,ABCG1,ABCG5,ACER2,ACER3,ACOT7,ACSM1,ACSM3,ADIPOR2,AGPAT4,AGPAT5,AGPS,AHR,AJUBA,AKR1C1/AKR1C2,ALDH8A1,ALG2,ALOX5,AMACR,ANG,ANGPT2,APOC3,ATF1,ATF2,AWAT1,B3GALT2,B3GNT5,B4GALNT1,B4GALT6,BAK1,BCL2,BDKRB2,BDNF,BHLHE40,BMP2,BMP5,BMP6,CALB1,CAMKK2,CAV1,CAV2,CBR4,CEBPA,CERS2,CERS3,CERS6,CERT1,CHPT1,CLU,CNEP1R1,CNKSR1,CNR1,CNR2,CNTFR,COTL1,CPNE3,CREB1,CRH,CRHR2,CSF3,CTNNB1,CXCL1,CY…	294
Cardiovascular Disease	Hypertension	6.19e-08	ABCB4,ABCC8,ABL1,ACE2,ACTR5,ADAMTS4,ADCY6,ADGRF5,ADRA2B,ADRA2C,ADRB1,AHR,AKAP12,ALDH8A1,ALKBH3,ANGPT2,ANKRD27,ANKRD55,APLN,APLNR,APOBEC3B,ARHGEF10,ARL8B,ASIC1,ASPN,ATP2B4,ATP2C1,BDKRB2,BMP2,BMPR1A,BMPR1B,BZW1,CA1,CA3,CACNA1C,CACNA2D1,CACNA2D2,CACNB1,CACNB2,CACNB4,CANX,CAV1,CCDC117,CCDC6,CCDC85A,CCNY,CHRM5,CHRNA6,CHRNA9,CIART,CLIC5,CMTM7,CRHR2,CSTF2T,CTTN,CX3CL1,CXCL11,CYP3A5,DCHS1,DENND11,DHFR,DN…	280
Cardiovascular System Development and Function,Organ Morphology,Organismal Development	Morphology of heart ventricle	6.29e-08	ABCA1,ABCC8,ABL1,ACE2,ACKR3,ADAM17,ADAM9,ADRA2B,ADRA2C,ADRB1,AKAP5,ANGPT2,ATF3,BNIP3,CACNA1C,CACNA2D1,CACNB2,CAPNS1,CASP9,CAV1,CAV3,CCN3,CCND2,CCND3,CDK2,CDK6,CDKN1B,CITED2,CLU,CNMD,CRK,CSRP3,CTSV,CXADR,DCHS1,DIO3,DOCK1,DPF3,DTNBP1,EFNA1,EGFR,EGLN1,EPAS1,EPN1,ERBB3,ERG,ESR2,FGF9,FKBP1A,FOXO1,GAS2L3,GATA4,GATA6,GNAQ,GNG5,GUCY1A1,HAND2,HAS2,HBEGF,HDAC7,HEXIM1,HEYL,HTR2B,IL6R,IL6ST,INHBA,ISL1,ITGB8,…	133
Cellular Movement	Cell movement of connective tissue cells	6.37e-08	ABL1,ABL2,APPL1,ARID5B,BAG4,CAPNS1,CAV1,CBL,CCDC88A,CCL3,CCN2,CCN3,CDKN1B,CRKL,CTNNB1,CX3CL1,ENAH,EZR,FN1,FOXO1,FRMD6,FRS2,GNA13,GPR183,GSN,HBEGF,HCK,HGF,HMGB1,HTN1,IKBKB,IQCJ-SCHIP1,ITGB1,JUN,L1CAM,LEP,LPAR1,LPP,MAP2K1,MAP3K1,MAP3K8,MAPK1,MAPKAPK2,MET,MRC2,MYH10,NCK2,NDST1,NDST3,PAK1,PALLD,PDLIM1,PGGT1B,PIP5K1A,PLAU,PMP22,POSTN,PRKAA1,PRKAR1A,PRKCE,PTEN,RAC1,RAP2A,RECK,RND3,S1PR1,SCHIP1,SDC4,SKA…	85
Tissue Development	Development of epithelial tissue	6.46e-08	ACVR1,ADAM17,ADAMTS8,ADRA2B,AHR,ALOX5,ANG,ANGPT2,ANGPTL1,APLN,ATOH8,ATP1B3,ATP5IF1,BCL2L11,BMP2,BMP6,CALCB,CASP9,CAV1,CAV2,CAVIN2,CBL,CBLL1,CD151,CDKN1B,CHD7,CLEC1B,CLIC4,CNMD,COL4A2,COL4A4,CTNNB1,CUL5,CXCL1,CXCL2,DAAM1,DAB2,DGKA,DICER1,DKK1,DLX3,DLX5,DMP1,E2F4,ECT2,EDNRB,EGFR,EGR3,EPHA2,ERN1,F2RL1,FAT1,FGF10,FGF7,FGF9,FLI1,FN1,FOXF1,FOXG1,FOXO1,FOXO3,FRS2,GAB1,GATA6,GJB2,GLI3,GMNC,GPC1,GRHL2,GRI…	199
Cell-To-Cell Signaling and Interaction	Adhesion of tumor cell lines	6.68e-08	ADAM10,ADAM17,ADAM9,ADD3,AKAP12,ALCAM,ARHGAP21,BCL10,CAV1,CCL3,CCN3,CD151,CD226,CD274,CD28,CD47,CHST6,CRK,CSK,CTNNB1,CTSB,CTTN,CX3CL1,CXCL2,DAB2,DNMT3B,DSG2,EFEMP1,EGFR,EGR3,EPHA2,ERBB3,ERP29,ETS1,FGA,FN1,FOXO1,FOXP1,FXYD5,FYB1,GNA13,GOLPH3,GPNMB,HES1,HGF,HMGB1,IGF1R,IL17A,IL6R,IRS1,ITGA6,ITGAV,ITGB1,ITGB2,JAM3,JUN,L1CAM,LASP1,LCP2,LEP,LIF,MAP2K1,MAP3K8,MAPK1,MAPK7,MARCKS,MECOM,MET,MGAT5,MINDY3,M…	130
Tissue Morphology	Quantity of epithelial tissue	6.72e-08	ABCA1,ABCG1,ALCAM,ANGPT2,ATM,B4GALNT1,BCL2,BDNF,BMP2,BMP6,BMPR1A,CAV1,CAV2,CDKN1B,CDKN2C,CEBPA,CREB1,CTNNB1,CTSB,DICER1,EFNB2,EOMES,EPAS1,ERRFI1,ESR2,ETS1,F11,F2RL1,FGF20,FGF7,FOXA1,FOXA2,FSHB,FSTL1,GATA4,GDNF,GNAQ,HES1,HGF,HOXA5,IGF1R,IL1A,ITGB1,ITGB8,KLF4,KRAS,LEP,LGR4,LIF,LMNA,MAOA,MAP2K1,MAP2K4,MITF,NEUROD1,NEUROD4,NOG,NR3C1,NTF3,PAX6,PROS1,PTEN,PTGER2,PTPN12,RAB38,RARB,RICTOR,RUNX2,SCP2,SIRT…	80
Cancer,Endocrine System Disorders,Organismal Injury and Abnormalities,Reproductive System Disease	Ovarian cancer	6.79e-08	ABAT,ABCA1,ABCA8,ABCC8,ABHD2,ABL1,ACAD11,ACE2,ACP3,ACP5,ACTR2,ADAM10,ADAM17,ADCYAP1R1,ADGRB3,ADGRF5,ADIPOR2,AGBL4,AGL,AHRR,AIFM1,AK3,AKR1C1/AKR1C2,AKTIP,ALCAM,ALK,ALKBH3,ALS2,ANG,ANGPT2,ANKIB1,ANKRD36,ANKRD50,ANKRD52,ANKRD55,ANLN,ANXA8/ANXA8L1,ARHGAP32,ARHGEF12,ARHGEF18,ARID2,ARID5B,ARMC9,ATAD2,ATG2B,ATM,ATP8A1,ATR,AURKB,B2M,B3GALNT1,BAG6,BAHD1,BAP1,BBS10,BCL10,BCL2,BCL2L11,BCR,BMP2K,BNC1,BOD1L1,…	613
Cancer,Organismal Injury and Abnormalities	Advanced stage tumor	6.89e-08	ABAT,ABCA1,ABCA8,ABL1,ABL2,ABRAXAS2,ACKR3,ACP5,ADAM17,ADAM9,ADGRE5,ADGRF5,ADI1,ADRA2B,ADRA2C,AHI1,AKAP12,AKR1C1/AKR1C2,ALCAM,ALK,ALOX5,ANGPT2,ANGPTL1,ANK3,ANXA8/ANXA8L1,AQP8,ARF4,ARID2,ARID5B,ATF3,ATM,ATP2C1,ATR,AURKB,B2M,B4GAT1,BACH1,BACH2,BAK1,BBC3,BCL10,BCL2,BCL2L11,BCR,BEX1,BEX4,BHLHE41,BLK,BMP6,BMPR1A,BNC1,BPIFA1,BTG1,C2orf88,C4A/C4B,CALD1,CALU,CARD16,CAV1,CBL,CCDC80,CCDC88A,CCN2,CCN4,CCNA1,…	417
Cancer,Organismal Injury and Abnormalities	Thoracic neoplasm	6.91e-08	A4GNT,ABCA5,ABCA8,ABCB10,ABL1,ABL2,ABRAXAS2,ACE2,ACKR3,ACP5,ADAM10,ADAM17,ADAM9,ADAMTS3,ADCYAP1R1,ADGRB3,ADGRL2,AEN,AGFG2,AGO1,AHR,AIFM1,AIPL1,AJAP1,AJUBA,AKAP12,ALCAM,ALDH8A1,ALK,ALOX5,AMACR,ANAPC1,ANGPTL1,AOAH,AP3S1,APLN,APOBEC3B,AQP10,AQP8,ARAP2,ARFGAP2,ARHGAP6,ARHGEF12,ARID2,ARID4B,ARID5B,ARMCX1,ASB11,ASZ1,ATAD2,ATF3,ATF7IP,ATM,ATP10B,ATP1B3,ATP5F1B,ATP5IF1,ATR,ATRNL1,ATXN1,AURKA,AURKB,AVEN,B…	847
Embryonic Development,Organ Development,Organismal Development,Respiratory System Development and Function,Tissue Development	Formation of lung	6.94e-08	ABCA1,ACE2,ACVR2B,ADAM17,ADAMTS18,ADGRF5,ADRA2B,AFF4,AKAP12,ATF2,ATXN1,ATXN1L,BAG6,BID,BMPR1A,CAV1,CAV2,CCN2,CDH11,CEBPA,CITED2,CLEC1B,CNOT9,CREB1,CRH,CTNNB1,DCHS1,DICER1,DUSP1,EGFR,ELK3,EPAS1,EPHA3,ERRFI1,ESR2,F11,FBXW7,FGF10,FGF7,FGF9,FOXA1,FOXA2,FOXF1,FOXP1,FOXP2,FSTL1,FUBP1,GATA4,GATA6,GLI3,GPC3,GREM1,GRHL2,HBEGF,HES1,HIKESHI,HOPX,HOXA5,ITGA6,ITGA8,ITGB1,ITGB6,JMJD6,KDR,KRAS,LAMC1,LFNG,LIF,LO…	128
Nervous System Development and Function,Organ Morphology,Organismal Development	Morphology of cerebellum	6.94e-08	ABCD2,ADAMTS4,AHI1,AKAP12,ALS2,ANK3,ATM,ATXN1,B4GALNT1,BCR,CACNA2D2,CALB1,CAMK4,CCND2,CDK5R1,CDK5R2,CDKN1B,CDKN2C,CNTN1,CTNNA2,CTSB,EGFR,EI24,EPB41L2,EPM2A,ERBB3,FMR1,FOXA2,FUBP1,GLB1,GLI3,GRID2,HEXB,KHDRBS1,KHDRBS2,KIF14,KIF2A,L1CAM,LIF,LMX1B,LYNX1,MAPK8IP1,MARVELD1,MDM4,MYH10,NEUROD1,NEUROD4,NFIA,NRCAM,OCLN,OSTM1,OTX2,PAFAH1B1,PIANP,POMGNT1,PTEN,PURA,RARG,RICTOR,RNF2,ROBO2,RORA,SGCE,SOAT1,SOX11…	71
Cancer,Gastrointestinal Disease,Organismal Injury and Abnormalities	Gastroesophageal cancer	7.04e-08	A4GNT,ABCA1,ABCA8,ABCC8,ABL1,ACO1,ACSF2,ACVR1,ADAM10,ADAM7,ADAM9,ADAMTS18,ADCK1,ADD3,ADGRB3,ADGRE5,ADGRL2,ADRA2B,ADRA2C,ADRB1,AGBL4,AGO1,AHRR,AJAP1,AKNAD1,ALCAM,ALK,ALS2,AMMECR1L,ANAPC1,ANGPT2,ANK3,ANLN,AP2A2,AP3M2,APBA2,APCDD1L,AQP2,ARC,ARHGAP32,ARHGEF18,ARID2,ARID3A,ARID5B,ASCC1,ASIC1,ATF5,ATG4B,ATM,ATP2C1,ATP5F1B,ATP6V0A2,ATP8A1,ATR,B2M,B4GALNT1,BACE2,BAK1,BCAP29,BCL10,BCL2,BDKRB2,BDNF,BDP1,BE…	638
Cancer,Organismal Injury and Abnormalities	Advanced malignant tumor	7.21e-08	ABAT,ABCA1,ABCA8,ABL1,ABL2,ABRAXAS2,ACKR3,ACP5,ADAM17,ADAM9,ADGRE5,ADGRF5,ADI1,ADRA2B,ADRA2C,AHI1,AKAP12,AKR1C1/AKR1C2,ALCAM,ALK,ALOX5,ANGPT2,ANGPTL1,ANK3,ANXA8/ANXA8L1,AQP8,ARF4,ARID2,ARID5B,ATF3,ATM,ATP2C1,ATR,AURKB,B2M,B4GAT1,BACH1,BACH2,BAK1,BBC3,BCL10,BCL2,BCL2L11,BCR,BEX1,BEX4,BHLHE41,BLK,BMPR1A,BNC1,BPIFA1,BTG1,C2orf88,C4A/C4B,CALD1,CALU,CARD16,CAV1,CBL,CCDC80,CCDC88A,CCN2,CCN4,CCNA1,CCND2…	416
Cancer,Hematological Disease,Immunological Disease,Organismal Injury and Abnormalities	Mature B-cell neoplasm	7.35e-08	ABCG1,ABL1,ACAD11,ACP5,ADAM7,ADAM9,ADGRB3,ADGRF5,ADGRL2,ADRB1,AGBL4,AGL,AHR,AKAP11,AKAP5,ALK,ALOX5,AMACR,ANKRD36,ANKRD50,APOBEC3A,APOBEC3B,ARHGAP17,ARID2,ARMC9,ATF3,ATM,ATP6V0D2,ATR,ATRNL1,ATXN1,ATXN3,AURKA,B2M,BACH2,BAK1,BAZ2B,BBC3,BCL10,BCL2,BCL2L10,BCL2L11,BDNF,BNC2,BOD1L1,BRD3,BTG1,C1QTNF7,C5orf22,CALD1,CASP2,CASP9,CAV1,CAV3,CAVIN2,CBFA2T3,CBX2,CCDC172,CCL3,CCL7,CCNB1,CCND2,CCND3,CCNG2,CCNT2,…	461
Cell Morphology,Organismal Injury and Abnormalities	Hypertrophy of cells	7.58e-08	ABCD2,ABL1,ADAM17,ADK,ADRB1,AHR,ANGPT2,ATM,BCR,BDNF,BMP2,BMPR1A,CAV1,CAV3,CCK,CDKN1B,CSF3,CSRP3,CTNNB1,CTSB,CTSC,CTSD,DBI,DICER1,DNAJC3,DTNBP1,DUSP1,EGFR,EI24,EPAS1,FOXO1,FOXO3,FST,GAL,GAS2L3,GATA4,GATA6,GDNF,GNAQ,H2AZ1,HAND2,HBEGF,HCK,HES1,HPRT1,HTR2B,HTR2C,IL6R,IL6ST,INHBA,JUN,KCND2,KLF4,LEP,LEPR,LIF,MAP2K3,MAP2K4,MAP2K7,MAPK1,MAPK7,MAPK8,MEF2C,MEX3C,MMP19,MMP9,MSTN,MTOR,MTPN,NFKB1,NOG,NOX4,NR4…	109
Cell Death and Survival	Cell death of central nervous system cells	7.58e-08	AATK,ABL1,ATF3,ATP2C1,ATXN1,B4GALNT1,BAG1,BAK1,BBC3,BCL2,BCL2L11,BCL2L12,BDNF,BMP2,CACNA2D2,CAPNS1,CASP2,CASP9,CCNB1,CDC25B,CDK2,CDK5R1,CDKN1B,CERS2,CLU,CTSD,CYCS,DDIT3,DICER1,DKK1,DUSP1,E2F3,E2F4,FAIM,FER,FOXG1,FOXO1,FOXO3,FUS,GAL,GCLM,GDNF,GLRX,GRID2,GRIN2B,GRM5,HBEGF,HSP90AA1,IGF1R,IL6ST,INPP5A,JUN,KCND2,KCNJ6,KLF6,MAOA,MAP2K1,MAPK1,MAPK10,MAPK7,MEF2C,MT3,MTOR,MTSS1,NCS1,NEUROD4,NFKB1,NGB,NMNA…	109
Cancer,Hematological Disease,Immunological Disease,Organismal Injury and Abnormalities	B cell cancer	7.73e-08	ABCG1,ABL1,ABL2,ACP5,ADAM9,ADD3,ADGRF5,ADRB1,AGBL4,AHR,AKAP11,AKAP5,ALK,ALOX5,AMACR,ANKRD36,ANKRD50,APOBEC3A,APOBEC3B,ARHGAP17,ARID2,ARID5B,ARMC9,ATF3,ATF7IP,ATM,ATR,ATXN1,ATXN3,AURKA,B2M,BACH2,BAK1,BAZ2B,BBC3,BCL10,BCL2,BCL2L10,BCL2L11,BDNF,BLNK,BNC2,BOD1L1,BTG1,BUB3,C1QTNF7,C5orf22,CALD1,CASP2,CASP9,CAV1,CAV3,CAVIN2,CBFA2T3,CBL,CBX2,CCL3,CCL7,CCNB1,CCND2,CCND3,CCNG2,CCNT2,CD160,CD226,CD274,CD28…	445
Cellular Development,Connective Tissue Development and Function,Tissue Development	Differentiation of bone	7.78e-08	ABL1,ACVR1,ACVR2B,ADAM17,ADK,AHR,ALOX5,ASF1A,ATP6V0D2,ATRAID,BCL2,BMP2,BMP3,BMP6,BMPR1A,BMPR1B,CALCB,CALCR,CAMK4,CAPNS1,CCL3,CCN4,CD200,CD47,CDK6,CEBPA,CEBPD,CREB1,CRK,CTNNB1,DDX5,DICER1,DKK1,DKK2,DLX5,EFNB2,EGFR,EPHA2,ERBB3,FGF9,FIGNL1,FOXP1,FSHB,GAB2,GABBR1,GLI3,GPC3,GPNMB,GPR183,GRB2,GREM1,GSN,H3-3A/H3-3B,HAND2,HDAC7,HTR2B,ID4,IL12B,IL17A,IL1A,IL6R,IL6ST,INHBA,IRAK3,IRS1,ITGB1,JUN,KLF10,KLF4,K…	142
Cellular Movement,Renal and Urological System Development and Function	Cell movement of kidney cell lines	8.12e-08	ADI1,ARHGEF12,CCR8,CDH11,CHL1,CNR1,CTNNB1,CTNND2,CTTN,CXCL1,DAB2,DLC1,DOCK1,DOCK4,EPHA2,ETS1,EXOC5,EZR,FGA,FN1,GAB1,GAP43,GRB2,HARS1,HGF,ITGA1,ITGB1,ITGB2,L1CAM,MAP3K5,MAPK1,MET,NARS1,NFKB1,NOX4,PAK1,PDPN,PLAU,POSTN,PRKCE,PRKX,PTP4A1,RALB,RANBP9,RECK,RHOA,ROCK2,SARS1,SELE,SEPTIN9,SRC,SRSF1,TBXA2R,TMEFF2,UTS2,VEGFA,VEGFD,WASF3,WASL,ZEB1	60
Cancer,Endocrine System Disorders,Organismal Injury and Abnormalities,Reproductive System Disease	Ovarian carcinoma	8.47e-08	ABCA1,ABCA8,ABCC8,ABHD2,ABL1,ACAD11,ACE2,ACP3,ACP5,ACTR2,ADAM17,ADCYAP1R1,ADGRB3,ADGRF5,ADIPOR2,AGBL4,AGL,AHRR,AIFM1,AK3,AKR1C1/AKR1C2,AKTIP,ALK,ALKBH3,ALS2,ANGPT2,ANKIB1,ANKRD36,ANKRD50,ANKRD52,ANKRD55,ANLN,ANXA8/ANXA8L1,ARHGAP32,ARHGEF12,ARHGEF18,ARID2,ARID5B,ARMC9,ATAD2,ATG2B,ATM,ATP8A1,ATR,AURKB,B2M,B3GALNT1,BAG6,BAHD1,BAP1,BBS10,BCL10,BCL2,BCR,BMP2K,BNC1,BOD1L1,BRPF3,BSN,BTLA,BTRC,C2orf88,C4…	555
Developmental Disorder	Growth failure or short stature	8.83e-08	A4GALT,ABCA1,ADRA2B,ADRA2C,AFF4,AGPS,AHR,AQP11,AQP2,AQP5,ARC,ARCN1,ARID5B,ATF2,ATF7,ATM,ATP2C1,ATR,AURKA,B3GALT6,BACE1,BAP1,BBS10,BCL2,BDNF,BMP2,BMPR1B,CACNA2D2,CCN2,CCN6,CCNC,CCNE2,CD2AP,CDX4,CEBPA,CEP120,CFL2,CLASP1,CLCN3,CNPY3,COL13A1,COL9A1,COPS5,COPS8,CREB3L2,CRIPT,CRTAP,CTSB,CTSV,CYCS,DBI,DCHS1,DDX11,DIO3,DNA2,DNAJA1,DNAJC5,E2F3,E2F4,E2F7,EDNRB,EFNB2,EGFR,EHHADH,ERN1,ESPL1,ESR2,ETS1,EXOSC2,…	274
Cancer,Gastrointestinal Disease,Organismal Injury and Abnormalities	Gastro-esophageal carcinoma	9.25e-08	A4GNT,ABCA1,ABCA8,ABCC8,ABL1,ACO1,ACSF2,ACVR1,ADAM7,ADAM9,ADAMTS18,ADCK1,ADD3,ADGRB3,ADGRE5,ADGRL2,AGBL4,AGO1,AHRR,AJAP1,AKNAD1,ALCAM,ALK,ALS2,AMMECR1L,ANAPC1,ANGPT2,ANK3,ANLN,AP2A2,AP3M2,APBA2,APCDD1L,AQP2,ARC,ARHGAP32,ARHGEF18,ARID2,ARID3A,ARID5B,ASCC1,ASIC1,ATF5,ATG4B,ATM,ATP2C1,ATP5F1B,ATP6V0A2,ATP8A1,ATR,B2M,B4GALNT1,BACE2,BCAP29,BCL2,BDKRB2,BDNF,BDP1,BEND7,BHLHE22,BLK,BMP2K,BNC2,BOD1L1,BRD9…	589
Cancer,Organismal Injury and Abnormalities	Embryonal tumor	9.36e-08	ABCA8,ABL1,ADGRB3,ADGRE5,AJUBA,AKAP12,ALCAM,ALK,AMMECR1,ANGPT2,ARF4,ARID5B,ARL13B,ATM,ATR,ATXN1,AURKA,BAP1,BBC3,BCAS1,BCL2L12,BCL2L13,BDKRB2,BSN,C4A/C4B,CACNA1E,CALB1,CALCB,CAP2,CASP2,CAV1,CCL3,CCND2,CD200,CD274,CDK2,CDK3,CDK6,CDKN1B,CDKN2C,CDKN3,CELF1,CEP83,CHD7,CKS2,CLU,COL4A2,CTNNB1,CXADR,CXCL1,CXCL9,CYCS,CYP51A1,DDX60L,DHFR,DICER1,DLC1,DOCK1,DTNA,DYNC1I1,ECT2,EFEMP1,EFNA5,EGFR,EGR3,ELMO1,ENTP…	245
Cardiovascular Disease,Cardiovascular System Development and Function,Organismal Injury and Abnormalities	Abnormal morphology of vasculature	9.44e-08	ACKR3,ADAM17,ADGRA2,ADRB1,AHR,ANGPT2,ARHGEF12,ARID4B,ATF2,BACH1,BCL2,BDKRB2,BMP2,CAV1,CD151,CDO1,CDX4,CITED2,CLEC1B,CLIC4,CLU,CREB1,CRHR2,CRK,CRKL,CTTN,CXADR,DCBLD2,DDAH1,DLC1,DLX3,DLX5,E2F7,EDNRA,EDNRB,EFNB2,EGLN3,ELK3,EPAS1,EPN1,ERG,ERN1,ERRFI1,ESR2,EYA1,FBXW7,FGF10,FN1,FOXA2,FOXC2,FXR1,GATA4,GATA6,GJB2,GNA13,GPC3,GPR180,GUCY1A1,HAND2,HAS2,HDAC7,HGF,ISL1,ITGAV,ITGB8,JMJD6,JUN,KAT7,KIDINS220,KLF…	134
Connective Tissue Disorders,Developmental Disorder,Gastrointestinal Disease,Organismal Injury and Abnormalities,Skeletal and Muscular Disorders	Orofacial cleft	9.51e-08	ADRA2B,ADRA2C,AHR,ARHGAP29,ASPH,CCP110,CDK20,CRK,CTNND1,CYP51A1,DHFR,DNMT3B,EFNA5,EGFR,FGF10,FGF9,FOXC2,FOXF2,GSKIP,HKDC1,INSIG1,INSIG2,IRF6,ITGAV,ITGB8,KCNJ2,LHX8,LRP6,MDM4,MEIS2,MMP16,MN1,MSTN,NDST1,PBX2,PBX3,PDGFRA,PITX2,PPP3CA,RAD23B,RARG,RSPO2,RYK,SATB2,SC5D,SNAI2,SOX11,SUMO1,TBX1,TBX22,TGFA,TP63,VEGFA,WFIKKN2	54
Cellular Movement	Cell movement of brain cells	1.01e-07	AURKA,BDNF,CDK5R1,CELSR2,CHL1,CTNNA2,CUL5,CX3CL1,DAB1,DCX,FOXG1,GDNF,GNA13,HGF,IGF1R,ITGB1,KATNA1,KLF4,L1CAM,MARVELD1,MYH10,MYL12A,NFIA,NRCAM,PAFAH1B1,POU3F3,PTEN,PTPRZ1,RAC1,RBFOX2,RELN,RERE,RHOA,RNF7,ROBO2,SEMA3F,SEPTIN14,SKIL,SLIT2,TBR1,TIAM2,TSNAX,UNC5D	43
Cardiovascular System Development and Function,Cellular Movement	Migration of endothelial cell lines	1.01e-07	ALCAM,BDKRB2,BDNF,CDKN1B,CTSB,CX3CL1,CXCL1,CXCL11,DLC1,EGFR,EPHA2,FRS2,HGF,HMGB1,HOXD10,IL17A,IL17B,ITGB1,KDR,KRAS,MAPK7,MET,MGAT3,NCF2,NCL,NEU1,NRG1,NTN4,PATJ,PLAU,PLD1,RAC1,RAP1B,RNF7,RUNX2,SDC2,SERPIND1,SRC,TMOD3,VEGFA,VEGFD,YAP1,ZNF24	43
Cancer,Organismal Injury and Abnormalities	Invasive tumor	1.01e-07	ABAT,ABCA1,ABL1,ABL2,ABRAXAS2,ACKR3,ACP5,ADAM17,ADAM9,ADAMTS18,ADAMTS3,ADAMTS4,ADAMTS8,ADGRE5,ADGRF5,ADI1,ADRA2B,ADRA2C,AKAP12,AKR1C1/AKR1C2,ALCAM,ALK,ALOX5,ANGPT2,ANGPTL1,ANK3,AQP8,ARF4,ARID2,ARID5B,ATAD2,ATF3,ATM,ATP2C1,ATP5IF1,ATR,AURKB,B2M,B4GAT1,BACH1,BACH2,BBC3,BCL2,BCL2L11,BEX1,BEX4,BHLHE41,BLK,BMPR1A,BPIFA1,C4A/C4B,CALD1,CALU,CASP2,CAV1,CBL,CBX2,CCDC80,CCDC88A,CCN2,CCN4,CCN6,CCNA1,CCND2,C…	451
Cancer,Organismal Injury and Abnormalities,Reproductive System Disease	Breast carcinoma	1.02e-07	ABAT,ABCA2,ABCA8,ABHD10,ABI2,ABL1,ABL2,ACP5,ADAM17,ADAMTS18,ADAMTS3,ADAMTS4,ADAMTS8,ADCK1,ADCY6,ADRA2C,AGAP3,AIPL1,AJUBA,ALK,ALOX5,AMOTL2,ANKRD27,ANKRD52,ANLN,ANP32B,AP3B2,ARF4,ARHGAP19,ARHGEF2,ARHGEF3,ARID2,ARID5B,ARMCX5-GPRASP2/GPRASP2,ARMT1,ARPC5L,ATAD2,ATM,ATP5IF1,ATR,B3GNT2,B3GNT5,B4GALNT1,BAG1,BAHD1,BAK1,BAP1,BCL2,BCR,BEX1,BICRA,BOD1L1,BRD9,BSN,BTRC,C14orf39,C1orf54,C3orf33,CACNA1C,CACNA1E,…	588
Cellular Development,Cellular Growth and Proliferation,Connective Tissue Development and Function,Tissue Development	Cell proliferation of fibroblasts	1.05e-07	ABL1,AHR,ARHGEF12,ARID3A,ATF3,ATM,BMP2,BTRC,CAV1,CBX2,CCDC80,CCN4,CCNB1,CCND2,CCND3,CCNG1,CD300A,CDK2,CDK6,CDKN1B,CDKN2C,CITED2,CREB1,CRK,CRKL,CTNNB1,CTSB,DAB2IP,DDX5,DHX9,DSG2,DUSP1,EDNRA,EGFR,ESPL1,FGF10,FGF4,FN1,FOXC1,FOXO4,FRMD6,FRS2,FYN,GNL3,GNPNAT1,GRB10,GRB2,HGF,HS6ST2,HTR2A,IDH2,IGF1R,IKBKB,IL22,IL6R,IL6ST,ITGA1,ITGB1,JUN,KDM5A,KLF4,KMT2A,KRAS,LIF,LMNA,LPAR1,MAP2K3,MAPK1,MAPK8,MAPK9,MCM9,…	129
Cellular Development,Cellular Growth and Proliferation,Embryonic Development,Organismal Development	Proliferation of embryonic cells	1.08e-07	ADRA2B,AGO1,APLN,ATF2,BDNF,BMP2,BMPR1A,BMPR1B,CDKN1B,CITED2,CTNNA1,CTNNB1,CX3CL1,DAGLA,DKK1,EGFR,EGLN1,ESPL1,ESR2,FGF10,FGF4,FGF7,FGF9,FOXF1,FOXG1,FOXP2,FRS2,FSTL1,FZD3,GLB1,GLI3,GNPNAT1,HAND2,HGF,HOXA1,HOXB5,HTR4,ID4,IL6ST,IRS1,IRS2,ITGA1,ITGA6,KCTD11,KDR,KITLG,KLF4,L1CAM,LEP,LIF,LMNA,LPAR1,LRP6,MAP3K1,MAPK8,MAPK9,MED1,MET,MMP9,NAP1L2,NEUROD4,NOG,NR4A3,NUMB,PAFAH1B1,PAX6,PDGFRA,PHF20L1,PIK3R1,PI…	96
Cancer,Hematological Disease,Organismal Injury and Abnormalities	Myelodysplastic syndrome or leukemia	1.08e-07	ABCB4,ABCG5,ABL1,ABL2,ACAD11,ACSM3,ACSM6,ADAM10,ADAM7,ADAMTS3,ADCY7,ADCYAP1R1,ADD3,ADGRB3,ADGRL2,ADRA2C,ADRB1,AGAP5 (includes others),AGL,AHI1,AIFM1,AKAP11,ALG10B,ALK,AMMECR1,ANAPC1,ANK3,ANKFY1,ANKHD1/ANKHD1-EIF4EBP3,ANKIB1,ANKRD36,ANKS1B,APLNR,AQP7,ARHGAP6,ARID2,ARID3A,ARID4B,ARID5B,ARIH1,ART3,ATF7IP,ATL1,ATM,ATP2B4,ATP6V0D2,ATR,ATRNL1,ATXN1,AURKA,AURKB,B2M,B4GALNT1,BAALC,BACH2,BAG1,BAK1,BBC3,BB…	646
Cellular Development,Cellular Growth and Proliferation,Connective Tissue Development and Function	Proliferation of fibroblast cell lines	1.11e-07	ACKR3,AHR,AKAP12,ALOX5,ANGPT2,ARHGAP32,ARHGEF12,ARID5B,ATG12,ATG9A,ATM,BACH2,BMP2,BTG1,BTRC,C1QTNF3,CAPRIN1,CAV1,CBL,CCN4,CCNA1,CDK6,CDKN1B,CEBPA,CKS2,CNOT6L,COPS5,CREB1,CRK,CTNNB1,CTSD,CXCL1,DCUN1D1,DHX9,DICER1,DPY30,E2F3,E2F4,E2F7,EGFR,ERBB3,ERG,ERRFI1,F2RL1,FBXW7,FGF4,FGF9,FLI1,FN1,FOXO1,FOXO3,FOXO4,GAB1,GDNF,GHRHR,GRB2,GRHL2,GTPBP4,HBEGF,HGF,HMGB1,IGF1R,IKBKB,IL17RD,IRS1,IRS4,ITGB1,JUN,KHDRBS…	161
Cell Cycle,Cellular Movement	Cytokinesis of tumor cell lines	1.11e-07	ANLN,AURKA,AURKB,CD2AP,ECT2,GATA6,GNAI1,GNAI3,KIF13A,KIF14,KIF20B,KIF23,L3MBTL1,LMNA,NEK7,OCRL,PI4KB,PIN1,RAB35,RAC1,RASSF1,RGS14,RHOA,SEPTIN6,SEPTIN7,SEPTIN9,SIAH1,SLC20A1,SPART,SSRP1,STX16,TERF1,TOP2A,TTC19,ZFYVE26	35
Cellular Movement	Cell movement of breast cancer cell lines	1.13e-07	ABCA1,ADAM10,ADAM9,ADGRF5,AHR,ANGPT2,ARRDC3,ATF3,ATOX1,BHLHE41,BMP2,BMP6,CAV1,CBL,CCDC88A,CCN2,CD151,CDKN1B,CEBPD,CERS6,CERT1,CNR2,CPNE3,CRK,CTDSP1,CTNNB1,CTTN,CXCL11,CXCL9,DAAM1,DLC1,DNAJB6,EFNA5,EGFR,EIF3A,EMP1,ENAH,EPHA2,ERBB3,ESR2,ETS1,EYA1,FER,FGF10,FGF7,FHOD1,FN1,FNBP1L,FOXA1,FOXC1,FOXF2,FOXO3,FOXP3,FSIP1,GAB1,GAB2,GNA11,GOLPH3,HGF,HOXA11,HSP90AA1,IGF1R,IL19,ITGA6,ITGAV,ITGB1,JUN,KCNN3,KHDR…	148
Cancer,Organismal Injury and Abnormalities	Extrapulmonary squamous cell carcinoma	1.15e-07	ABCA1,ABCA2,ABCB4,ABCG1,ABL1,ABL2,ACAD11,ACO2,ACOXL,ACSM5,ACSM6,ADAM17,ADAM9,ADAMTS18,ADD3,ADGRB3,ADGRE5,ADGRL2,AGAP5 (includes others),AHI1,AIFM1,AJUBA,AKAP11,AKAP12,AKNAD1,ALK,ALOX5,ALS2,AMMECR1,AMMECR1L,ANK3,ANKRD36,ANKRD50,ANKRD52,ANKS1B,ANKZF1,ANLN,AOAH,AP2B1,APBA2,AQP2,ARAP2,ARC,ARFGEF3,ARHGAP18,ARHGAP6,ARID2,ARID4B,ARID5B,ARIH1,ART4,AS3MT,ASB5,ASCC1,ASPH,ASPN,ASZ1,ATAD2,ATAT1,ATF2,ATF5,ATM…	1016
Cancer,Organismal Injury and Abnormalities	Malignant neoplasm of retroperitoneum	1.19e-07	AAK1,AATK,ABCB4,ABL1,ABRA,ACE2,ACKR3,ACO1,ACOT7,ACOXL,ACSF2,ACSM3,ACSM5,ACSM6,ADAM10,ADAM17,ADAM9,ADAMTS18,ADAMTS3,ADCYAP1R1,ADGRB3,ADGRE1,ADGRL2,ADRA2B,ADRA2C,AEBP2,AGL,AGO1,AGPAT5,AHR,AHRR,AJAP1,AJUBA,AKAP11,AKR1C1/AKR1C2,ALK,ALKBH3,ALS2,AMACR,ANKHD1/ANKHD1-EIF4EBP3,ANKRD52,ANKZF1,ANLN,ANP32E,AOC2,AP3B2,AP3S1,AP4E1,APCDD1L,APLNR,APPL1,AQP2,AQP7,AQP9,ARAP2,ARFGEF3,ARHGAP21,ARHGAP32,ARHGEF10,ARHG…	988
Cancer,Organismal Injury and Abnormalities	Development of benign tumor	1.19e-07	ABCA1,ABL1,ACSF2,AHR,AJUBA,ANGPT2,ANKIB1,AQP8,ARHGEF2,ATF2,ATM,ATP2C1,ATR,AURKB,BACE2,BAK1,BBC3,BCL2,BDNF,BID,BTRC,C10orf105,C2orf88,CA1,CAV1,CCDC80,CCK,CCNB1,CCND3,CDK2,CDKN1B,CDKN2C,CEACAM6,CEACAM7,CEBPD,CFAP20DC,CLU,CNR1,CTNNB1,CTSB,CYP1B1,CYP2D6,CYP3A5,DAP3,DAPK1,DDX5,DHFR,DICER1,DMWD,DNMT3B,DUT,E2F3,EGFR,ENO3,ENTPD5,EPB41L3,ERBB3,ERBIN,ERRFI1,ESR2,EXO1,EXT1,FBXW7,FGF7,FHIT,FOXO1,FOXO3,FOXO4,…	200
Cellular Development,Connective Tissue Development and Function,Tissue Development	Differentiation of bone cells	1.23e-07	ABL1,ACVR1,ACVR2B,ADAM17,ADK,AHR,ALOX5,ASF1A,ATP6V0D2,ATRAID,BCL2,BMP2,BMP3,BMP6,BMPR1A,BMPR1B,CALCB,CALCR,CAMK4,CAPNS1,CCL3,CCN4,CD200,CD47,CDK6,CEBPA,CEBPD,CREB1,CRK,CTNNB1,DDX5,DICER1,DKK1,DKK2,DLX5,EFNB2,EGFR,EPHA2,ERBB3,FGF9,FIGNL1,FOXP1,FSHB,GAB2,GABBR1,GLI3,GPC3,GPNMB,GPR183,GRB2,GREM1,GSN,H3-3A/H3-3B,HAND2,HDAC7,HTR2B,ID4,IL12B,IL17A,IL1A,IL6R,IL6ST,INHBA,IRAK3,IRS1,JUN,KLF10,KLF4,LGR4,LI…	140
Cellular Development	Epithelial-mesenchymal transition	1.29e-07	ABL1,ARHGAP21,B2M,BMP2,CAV1,CCN4,CDH11,CDKN1B,CLIC4,CTNNB1,CXCL9,DAB2IP,DDX5,DICER1,EFEMP1,EFNA1,EGFR,EPHA3,ERBB3,ERG,ESR2,FOXA1,FOXA2,FOXC2,FOXF2,FOXO3,FSIP1,GLIS2,GRHL2,HAS2,HEYL,HGF,HMGA2,HOOK1,IDH2,IFIT2,IGF1R,IKBKB,IL17A,IRS1,IRS2,KLF4,KRAS,LEP,LTB4R2,MAP3K3,MAPK1,MEMO1,MESP2,MET,MGAT5,NAMPT,NDRG1,NOG,NRG1,NRP1,NUMB,PDCD4,PDLIM1,PEBP1,PHB,PIK3CA,PIN1,PLAU,POFUT1,PPP2CA,PPP3R1,PRKAR2A,PRKCI,P…	102
Cancer,Organismal Injury and Abnormalities,Respiratory Disease	Lung tumor	1.34e-07	A4GNT,ABCA5,ABCA8,ABCB10,ABL1,ABL2,ABRAXAS2,ACE2,ACKR3,ACP5,ADAM10,ADAM17,ADAM9,ADAMTS3,ADCYAP1R1,ADGRB3,ADGRL2,AEN,AGFG2,AGO1,AHR,AIFM1,AIPL1,AJAP1,AJUBA,AKAP12,ALCAM,ALDH8A1,ALK,ALOX5,AMACR,ANAPC1,ANGPTL1,AOAH,AP3S1,APLN,APOBEC3B,AQP10,AQP8,ARAP2,ARFGAP2,ARHGAP6,ARHGEF12,ARID2,ARID4B,ARID5B,ARMCX1,ASB11,ASZ1,ATAD2,ATF3,ATF7IP,ATM,ATP10B,ATP1B3,ATP5F1B,ATP5IF1,ATR,ATRNL1,ATXN1,AURKA,AURKB,AVEN,B…	837
Cellular Movement	Homing of cells	1.36e-07	ACKR3,ACTR2,ADAM10,ADAM17,ADGRA2,AKAP12,AKIRIN1,ALOX5,ANGPT2,APLN,APLNR,BCL2,BDKRB2,BDNF,C10orf99,C4A/C4B,CALCB,CAV1,CBL,CCDC88A,CCL18,CCL22,CCL28,CCL3,CCL3L1,CCL7,CCN3,CCR8,CCR9,CD151,CD28,CD47,CD69,CERT1,CKLF,CLCN3,CNR1,CNR2,CRK,CRKL,CSF3,CSK,CX3CL1,CXADR,CXCL1,CXCL11,CXCL2,CXCL9,CYRIB,DAAM1,DEK,DGKA,DOCK4,EDNRA,EDNRB,EFNB2,EGFR,EGR3,ELMO1,ELMO2,ENAH,EPHA2,ERBB3,F2RL1,FER,FGF10,FGF7,FLOT1,FN1,F…	210
Cell Morphology,Organismal Injury and Abnormalities	Blebbing	1.46e-07	AHR,AIFM1,BCL2,CDC42SE1,CDC42SE2,CENPA,CTTN,DAPK1,EFNA5,EMP1,EMP2,EZR,INHBA,LPAR1,LPAR3,MAPK8,MARCKS,MYLK,NOX4,PMP22,RAC1,RHOA,ROCK1,SRC,TAC1,TAOK1,TOR1A,TOR1AIP2,TOR1B,TOR3A	30
Cell-To-Cell Signaling and Interaction,Cellular Assembly and Organization	Cell-cell contact	1.5e-07	ABCA1,ABL1,ABL2,ADAM10,ADAM9,ADGRB3,ADGRE5,ADGRL2,AFG3L2,AHR,AJUBA,ALCAM,ALS2,AMIGO2,ANGPT2,ANK3,AP3M2,ARHGAP19,ARHGAP21,ATXN3,B2M,BACE1,BCL2,BDNF,BMPR1B,BPY2 (includes others),BSN,CACNA2D1,CACNA2D2,CACNB4,CALCB,CAPRIN1,CATSPER2,CAV1,CAV3,CBLL1,CBLN2,CD151,CD164,CD200,CD274,CD2AP,CD46,CD47,CD80,CDH11,CDK5R1,CEACAM6,CEACAM8,CHRM5,CLIC4,CNTN1,CNTN4,COL13A1,CRKL,CSK,CSRP3,CSTA,CSTF2T,CTNNA1,CTNNB1,C…	274
Cancer,Hematological Disease,Organismal Injury and Abnormalities	Hematologic cancer of cells	1.57e-07	ABAT,ABCG1,ABL1,ABL2,ABRAXAS2,ACAD11,ACSM6,ADAM7,ADAM9,ADD3,ADGRA2,ADGRB3,ADGRF5,ADGRL2,ADRB1,AGBL4,AGL,AHR,AKAP11,AKAP5,ALK,ALOX5,AMACR,ANGPT2,ANK3,ANKIB1,ANKRD36,ANKRD50,APOBEC3A,APOBEC3B,ARHGAP17,ARHGEF3,ARID2,ARID5B,ARMC9,ATF2,ATF3,ATF7,ATF7IP,ATM,ATP6V0D2,ATR,ATRNL1,ATXN1,ATXN3,ATXN7L1,AURKA,AURKB,B2M,BACH2,BAG2,BAK1,BAP1,BASP1,BAZ2B,BBC3,BCL10,BCL2,BCL2L10,BCL2L11,BCL2L13,BCR,BDNF,BLNK,BNC2…	621
Cardiovascular Disease,Cardiovascular System Development and Function,Organ Morphology,Organismal Development,Organismal Injury and Abnormalities	Abnormal morphology of dilated atrium	1.57e-07	ABL1,ACKR3,CYP51A1,EDNRA,EPHA3,FGF9,FKBP1A,FOXC2,HDAC7,HTR2B,KIDINS220,MBNL1,MBNL2,NTF3,TBX5,TH,ZFPM2	17
Cell-To-Cell Signaling and Interaction	Binding of tumor cell lines	1.66e-07	ADAM10,ADAM17,ADAM9,ADD3,AKAP12,ALCAM,ARHGAP21,BCL10,CAV1,CBL,CCL3,CCN3,CD151,CD226,CD274,CD28,CD47,CD80,CDHR3,CHST6,CLEC4G,CNTFR,CRK,CSK,CTNNB1,CTSB,CTTN,CX3CL1,CXADR,CXCL2,CXCL9,DAB2,DNMT3B,DSE,DSG2,EFEMP1,EGFR,EGR3,EPHA2,ERBB3,ERP29,ESM1,ETS1,FGA,FN1,FOXO1,FOXP1,FXYD5,FYB1,FYN,GAL3ST1,GNA13,GOLPH3,GPC3,GPNMB,GRIA4,HAS2,HCK,HES1,HGF,HMGB1,HS3ST3B1,IGF1R,IL17A,IL1R2,IL6R,IRS1,ITGA6,ITGAV,ITGB1,I…	160
Organismal Development	Size of body	1.72e-07	ABCA1,ABCA2,ABL1,ABL2,ACTA1,ADAM17,ADAMTS18,ADCYAP1R1,ADGRF5,ADRB1,AFG3L2,AHI1,AHR,AKAP11,ALK,APBA2,APBB2,APLNR,APRT,AQP11,AQP5,AQP7,ARID3A,ARID4B,ARID5B,ATM,ATXN1L,BACE1,BACE2,BBS10,BCAT2,BCL2,BCL2L11,BDNF,BIRC2,CACNA2D2,CAMK4,CANX,CASP9,CAV1,CBX2,CCND3,CCNY,CCP110,CDK2,CDK6,CDKN1B,CDKN2C,CDO1,CEBPA,CEP19,CERS3,CFL2,CHD7,CLCN3,CLIC4,CNPY3,CNR1,CNTN1,COPS5,COQ9,CREB1,CRH,CRKL,CTSD,DACT1,DBI,DERL2…	314
Connective Tissue Development and Function,Connective Tissue Disorders,Organismal Injury and Abnormalities,Skeletal and Muscular Disorders,Skeletal and Muscular System Development and Function,Tissue Development	Abnormal morphology of bone	1.76e-07	ABCB4,ACVR2B,AKAP11,ARID5B,ARL6,ATP6V0D2,ATXN1L,BMP6,BMPR1B,CALCB,CAV1,CBX2,CCN2,CCN3,CCP110,CD47,CD80,CDK20,CDO1,CHD7,CNMD,CNR2,COL9A1,CREB3L2,CRKL,CRTAP,CSF3,CTSV,CYP51A1,DACT1,DCHS1,DERL2,DKK1,DLX5,DMP1,DNAJC21,E2F3,E2F4,E2F5,EBF1,EDNRA,EFEMP1,EGFR,ERRFI1,ESR2,EVX2,EXT1,EYA1,FGF10,FOXC2,FOXF2,FST,FSTL1,G6PC,GAB2,GNA11,GNAI3,GNAQ,GPC3,GSN,HCK,HELLS,HEXB,HOXA1,HOXA10,HOXA11,HOXA5,HOXA9,HOXB5,HOX…	172
Gene Expression	Transactivation	1.78e-07	ACVR1,ACVR2B,AHR,AHRR,APBA2,APPL1,ARHGEF12,ASCC1,ATF1,ATF2,ATOX1,BAG1,BCL2,BCR,BDNF,BICRA,BMP2,BTRC,CCN2,CCND2,CCND3,CCNH,CCNT1,CD28,CD80,CHP1,CIAO1,CITED2,COPS5,CREB1,CTNNB1,DAB2,DAP3,DDIT3,DDX20,DDX58,DDX60L,DHX9,DTX4,DUSP3,E2F3,E2F4,ELL,EPAS1,ERG,ERN1,ESR2,FOXC1,FOXO1,FOXO3,FOXO4,FOXP3,GABPB1,GABPB2,GATA4,GATA6,GNA13,HBP1,HES1,HGF,HSPA9,IKBKB,IL1A,IL6R,INHBA,IRF4,JAZF1,JMJD6,JUN,KAT7,KCTD11,KL…	181
Cellular Assembly and Organization,Cellular Function and Maintenance	Quantity of cellular protrusions	1.83e-07	ABL1,ACTR2,ADAMTS4,ADI1,AKAP5,ARC,ATAT1,ATP2C1,BACE1,BAG4,BCL2,BDNF,BMP2,CANX,CBLN4,CD2AP,CDK5R1,CRMP1,CTNNB1,CTTN,DAAM1,DICER1,DOCK1,EGFR,EIF4EBP2,ENAH,ERBIN,ERG,EYA1,EZR,FN1,FSCN1,FYN,GAL,GPM6A,GRIP1,GSN,HAS2,HTR1B,ITGA8,KALRN,KATNA1,KIF5A,L1CAM,MAOA,MAPK10,MET,MSN,MTSS1,MYB,NRG1,NRN1,P2RY12,PAK1,PCYT1B,PFN1,PFN2,PMP22,PTEN,PTPRZ1,RAC1,RALA,RALB,RBBP4,SIN3A,SMAD4,SOD1,SOX2,SP4,SPAST,TPM3,TTBK2,…	73
Cancer,Endocrine System Disorders,Organismal Injury and Abnormalities	Extrapancreatic neuroendocrine tumor	1.83e-07	ABCB10,ABL1,ADAM10,ADAMTS18,ADRA2B,ADRA2C,AEN,AFF4,AKAP5,APOBEC3A,ARHGEF2,ATM,AVEN,B2M,BCL2,BDNF,BLK,BLOC1S6,BNC2,C10orf105,C16orf70,CABLES1,CACNA1C,CAMSAP2,CBL,CCDC103,CCDC180,CCND3,CCNE2,CCSAP,CD274,CD70,CDC25B,CDH11,CDK2,CDKN1B,CDKN2C,CEBPD,CEP41,CFAP20DC,CHD2,CHL1,CHRM5,CLASP1,CLU,COL25A1,CREBRF,CTNNB1,CUZD1,DAPK1,DDX60L,DHFR,DHRSX,DICER1,DIS3,DLC1,DMWD,DNAJC28,DNMT3B,DST,DUT,DYNC1I1,E2F3,E2F…	249
Cardiovascular System Development and Function	Morphology of vessel	1.84e-07	ABCB4,ABL1,ABL2,ACKR3,ADAM17,ADGRA2,ADRB1,AHR,ANGPT2,APLN,ARID4B,BACH1,BCL2,BDKRB2,BMP2,CD151,CDKN1B,CDO1,CITED2,CLEC1B,CLU,CRHR2,CRK,CRKL,CTTN,CXADR,CYP51A1,DCBLD2,DDAH1,DLX5,E2F7,EDNRA,EDNRB,EFNB2,EGLN1,EGLN3,ELK3,EPN1,ERG,ERN1,ESR2,EYA1,F2RL1,FAT1,FBXW7,FGF10,FN1,FOXA2,FOXC2,FXR1,GATA4,GATA6,GNA13,GPC3,GPR180,HAND2,HAS2,HDAC7,HES1,HGF,IL1A,ISL1,ITGAV,ITGB8,JMJD6,JUN,KAT7,KLF5,KRAS,L1CAM,LIF,LM…	135
Nutritional Disease	Overweight disorder	1.85e-07	ABAT,ABCC8,ABCG1,ADGRE1,ADRA2B,ADRA2C,ADRB1,ANG,ANGPT2,ANGPTL6,APOC3,AQP7,ARID5B,ATF3,ATP6AP2,AURKB,B3GNT5,BBS10,BCAT2,BDNF,C1QL3,C1QTNF3,CA1,CA3,CACNA1C,CACNA2D1,CACNB1,CACNB2,CACNB4,CALCB,CAMKK2,CAV1,CBL,CCDC73,CCNA1,CCNB1,CCND3,CDCA8,CENPA,CEP19,CERS6,CFAP20DC,CHRM5,CHRNA6,CHRNA9,CISD1,CLOCK,CNR1,CNR2,COX19,CREB1,CREBRF,CRHR2,CX3CL1,CXCL11,CXCL2,CYBRD1,CYP51A1,DDIT3,DDX60L,DHFR,DICER1,DIXDC1,D…	222
Neurological Disease,Organismal Injury and Abnormalities,Psychological Disorders	Disorder of basal ganglia	1.89e-07	ABCD2,ABL1,ADCY7,ADRA2B,ADRA2C,ADRB1,AHCYL1,AP1S2,APLNR,ARHGAP32,ARPP19,ATP5MG,ATP6AP2,ATXN1,B2M,B3GNT2,B4GALNT1,B4GAT1,BASP1,BCAS1,BCL2,BCR,BDNF,BHLHE40,BIRC2,C19orf12,C4A/C4B,CACNA1C,CALB1,CAMK4,CAMKK2,CASP2,CASP9,CAV1,CCN2,CD160,CDK5R1,CDR1,CERS2,CHAF1B,CHRM5,CLU,CNR1,CNR2,COX7B,COX7C,CREB1,CTNNB1,CTSB,CX3CL1,CYCS,CYP2D6,CYP51A1,DDC,DDIT3,DDX60L,DIRAS2,DNAJA1,DNAJB6,DNAJC13,DTNA,DYNC1I1,EGLN1,…	290
Cardiovascular Disease,Organismal Injury and Abnormalities	Peripheral vascular disease	1.92e-07	ABCA1,ABCC8,ADAMTS8,ADGRE5,ADRA2B,ADRA2C,ADRB1,ALOX5,ANGPT2,ANKIB1,ATM,ATP2C1,ATR,B2M,BAG5,BCL2,BDNF,BEX4,CA1,CA3,CACNA1C,CACNA2D1,CACNB1,CACNB2,CACNB4,CCL18,CD1D,CFHR1,CHMP2B,CHORDC1,CHRM5,CHRNA6,CHRNA9,CKAP4,CLEC1B,CLINT1,CLU,CNR1,COX7C,CTDSP2,CTSB,CTSC,CX3CL1,CYP2C19,CYP2D6,CYRIB,DAB2,DDC,DHFR,DNAJA1,DNAJB4,DNAJB5,EDNRA,EGFR,EIF1B,F11,F13A1,F2RL2,FER,FN1,FYB1,GABRA2,GABRA3,GABRA5,GABRA6,GABRB1…	179
Cancer,Organismal Injury and Abnormalities	Intrathoracic malignant tumor	1.99e-07	A4GNT,ABCA5,ABCA8,ABCB10,ABL1,ABL2,ABRAXAS2,ACE2,ACKR3,ADAM10,ADAM17,ADAM9,ADAMTS3,ADCYAP1R1,ADGRB3,ADGRL2,AGFG2,AGO1,AHR,AIFM1,AIPL1,AJAP1,AJUBA,AKAP12,ALCAM,ALDH8A1,ALK,ALOX5,AMACR,ANAPC1,ANGPTL1,AOAH,AP3S1,APLN,APOBEC3B,AQP10,AQP8,ARAP2,ARFGAP2,ARHGAP6,ARHGEF12,ARID2,ARID4B,ARID5B,ARMCX1,ASB11,ASZ1,ATAD2,ATF3,ATF7IP,ATM,ATP10B,ATP5F1B,ATP5IF1,ATR,ATRNL1,ATXN1,AURKA,AURKB,AVEN,B2M,BACE2,BAG6,BA…	823
Infectious Diseases	Viral Infection	2e-07	A4GALT,ABCD2,ABCE1,ACE2,ACP3,ACTR2,ADAM10,ADGRE5,ADK,ADRA2B,ADRA2C,ADRB1,AEBP2,AFG3L2,AGFG1,AGO1,AHCYL1,AHR,AKTIP,ALKBH3,ALOX5,AP2B1,AP3M1,APLN,APLNR,APOBEC3B,ARCN1,ARGLU1,ARHGAP21,ARHGAP32,ARHGEF12,ARPC5,ARRDC3,ASF1A,ATCAY,ATG12,ATOX1,ATP1B3,ATP2C1,ATP5F1B,ATP5IF1,ATP6AP2,ATP6V0B,ATP6V1G1,ATR,ATRAID,B2M,BAG6,BAHD1,BAK1,BBC3,BCL2,BCL2L11,BCR,BLK,BMP2,BMP2K,BRINP2,BTRC,C1orf174,C4A/C4B,CACNA2D1,CA…	545
Organ Morphology,Reproductive System Development and Function	Morphology of genital organ	2.09e-07	ABCA1,ABCG1,ACP3,AFF4,AHR,AKAP12,ALK,AQP8,ARID4B,ARID5B,ARL4A,ASZ1,ATAT1,ATM,AURKC,BAK1,BCAT2,BCL2,BCL2L11,BDKRB2,BMPR1B,BNC1,BOLL,CABLES1,CAMK4,CASP2,CAV1,CBX2,CCNA1,CCND2,CCNE2,CDC25B,CDK2,CDKN1B,CDKN2C,CEBPD,CNBD2,CNOT7,CPEB1,CSTF2T,CTNNB1,DACT1,DDIAS,DIO3,DMRTB1,DNAJA1,DUSP1,E2F3,E2F4,E2F5,EFEMP1,ELMO1,ERRFI1,ESR2,EXO1,FABP2,FGF10,FGF9,FKBP1A,FKBP6,FMR1,FOXO3,FSHB,FST,FZD1,GAL,GAL3ST1,GALP,GA…	207
Cell Signaling,Post-Translational Modification	Activation of Protein kinase	2.1e-07	ADAM9,ADRA2B,ALK,ALS2,AVPI1,BMP2,CACUL1,CAMK2N1,CAV3,CCK,CDC25B,CDK5R1,CDK5R2,CDKN1B,CDKN2C,CEBPA,CEP43,CHP1,CRHR2,CRK,CRKL,DAB1,DAB2,DAB2IP,DGKG,DGKH,DNAJC3,EDNRA,EGFR,EPGN,ERN1,ERP29,F2RL1,FGF10,FRS2,GAB1,GAP43,GNAQ,GRM1,GRM5,GSKIP,HEXIM1,HGF,HTR1B,HTR2B,IPO5,IPO7,IQGAP3,ITGA1,LAMTOR3,LCP2,LPAR1,LPAR3,LRP6,MAP2K1,MAP2K3,MAP2K4,MAP2K7,MAP3K1,MAP3K2,MAP3K20,MAP3K4,MAP3K5,MAP4K5,MET,MMD,MMD2,MYOCD…	103
Behavior	Anxiety	2.14e-07	ADCYAP1R1,AKAP11,AKAP5,APBA2,ARHGEF10,ATF7,BACE1,BAG1,BCAS1,BDNF,BMPR1A,BMPR1B,CAMK4,CBLN4,CCK,CHL1,CLOCK,CNR1,CNR2,CPEB4,CREB1,CRH,CRHR2,CSK,CTNNB1,DICER1,DIXDC1,DUSP1,ELAVL4,ESR2,FEV,FGF9,FMR1,GABBR1,GAD2,GAL,GJB2,GNA11,GNAQ,GRIA1,GRIA4,GRIN2B,GRM5,HDC,HOMER1,HTR1A,HTR1B,HTR2A,HTR4,IGF1R,KALRN,KCNC2,KCNJ11,KCNJ6,KIF13A,KMT2A,LMTK3,LRRC7,LYPD1,MAPK1,MMP9,NAMPT,NDST3,NFKB1,NPAS3,NPEPPS,NPY2R,OPHN…	91
Cell Death and Survival	Cell death of sarcoma cell lines	2.16e-07	ABL1,AIFM1,ATAD2,ATF1,ATF3,ATG10,ATM,ATR,AURKA,BAG1,BAG6,BAK1,BBC3,BCL2,BCL2A1,BCL2L11,BHLHE40,BID,BIRC2,BMP2,BMPR1B,BNIP3,BUB3,CABLES1,CAPNS1,CASP2,CASP9,CAV1,CCNG1,CDIP1,CDK2,CDK6,CDKN1B,CLU,CSTA,CTSB,DCTN3,DDX58,DHX9,DPP8,E2F3,ETS1,FAP,FOXK2,FOXO3,HCK,HGF,IGF1R,IKBKB,IL24,ING2,JUN,KITLG,LAMP2,LIMS1,MAP2K4,MAP3K1,MAPK8,MAPKAPK2,MDM4,NAMPT,NAT10,NCL,NDN,NFKBIZ,NLRP11,NR3C1,NUAK1,NUMB,NUPR1,OTUB1…	96
Cellular Development,Skeletal and Muscular System Development and Function,Tissue Development	Differentiation of muscle	2.3e-07	ABL1,ACVR1,AKIRIN1,APLN,APLNR,ARHGEF3,ASF1A,ATF2,ATF3,BARX2,BDNF,BMP2,BTG1,CAMK1,CAV3,CCN3,CEBPA,CENPX,CITED2,CSRP3,CTNNA1,CTNNA2,CTNNB1,DDIT3,DDX5,DICER1,EID2B,EIF5A,EOMES,FBXO40,FEM1C,FGF10,FN1,FOXF1,FOXN2,FOXO1,FOXO4,GATA4,GATA6,H3-3A/H3-3B,HAND2,HEYL,HIF1AN,HLF,HMG20B,HOPX,IL36G,ITGA6,ITGB1,KLF5,KRAS,LAMC1,LIF,LIMS1,LMNA,MAFF,MAP2K1,MAP2K4,MAP3K5,MAPK1,MAPK8,MAPK9,MBNL1,MBNL3,MEF2C,MESP2,MET,…	119
Behavior	Emotional behavior	2.3e-07	ABCA2,ABL2,ADRA2B,ADRA2C,ADRB1,ALS2,APBA2,APRT,ARC,ARHGAP32,ARID5B,ASIC1,ATF7,B2M,BCL2,BDNF,CACNA1E,CBLN4,CCK,CD47,CDH11,CHRM5,CNR1,CNR2,CRH,CRHR2,CTNNA2,CTNNB1,CYP2D6,DBI,DICER1,DLGAP2,EGR3,EIF4EBP2,ESR2,FBXL20,FEV,FGF9,FMR1,FXR2,FYN,GABBR1,GABRA5,GAD2,GJB2,GNA11,GNAQ,GRIA1,GRIK2,GRIN2B,GRM5,GRM7,HOMER1,HPRT1,HTR1A,HTR1B,HTR2A,HTR2B,HTR2C,IGF1R,IKBKB,KCNJ11,KHDRBS1,LEPR,LMTK3,LRRC7,LYPD1,MAOA,MA…	119
Cell-To-Cell Signaling and Interaction,Embryonic Development	Binding of embryonic cell lines	2.31e-07	ABCA1,AKAP12,ATAT1,CAV1,CCN2,COLEC12,CRHR2,DAPK1,DLC1,FGA,FN1,GAB1,GRB2,HGF,INHBA,ITGAV,ITGB1,ITGB2,LOX,MGAT5,NCK2,PALLD,PLAU,PMP22,POSTN,PPP2CA,RASA1,RELN,SCARA3,SCARB1,SDC2,SDC4,SH3KBP1,SORT1,SRC,TMEM123,UTS2,VEGFA,VEGFD	39
Cell Death and Survival,Embryonic Development	Cell death of embryonic cells	2.34e-07	AGO1,AIFM1,ATF1,ATM,ATP2C1,BCL2,BCL2L11,BID,BMPR1A,BMPR1B,BNIP3,CAPNS1,CREB1,CTNNB1,DHX9,DICER1,DNMT3B,ETS1,EYA1,FOXO1,GATA6,GLI3,H3-3A/H3-3B,IL6ST,ISL1,ITGAV,KDR,LIMS1,MAP2K4,MAP3K1,MAPK1,MET,MTCH2,NRP1,PIK3R1,PTHLH,RAC1,RAD17,RASA1,SIX1,SMAD5,SOX10,SOX11,SOX17,TBX1,TNFSF11,TNFSF14,TPM3,XRCC4,YY1	50
Embryonic Development,Nervous System Development and Function,Organ Development,Organismal Development,Tissue Development	Formation of hippocampus	2.34e-07	ACVR1,ADAM10,ALK,ATAT1,BDNF,CDK5R1,CDK5R2,CDK6,CNR1,CREB1,CRK,CRKL,CXADR,DAB1,DCX,FGF13,FOXC1,FOXG1,FYN,GLI3,GRM1,GRM5,ID4,KIF14,L1CAM,L2HGDH,LAMC1,LMX1A,NEUROD1,NFIB,NOG,NR4A3,OGDH,OTX2,PAFAH1B1,PRDM16,PTEN,RAB17,RAC1,RELN,RHOA,SEMA3F,SMAD4,SRC,TSC1,VEGFA,VLDLR,YWHAE,ZBTB18,ZEB2	50
Cell Death and Survival	Apoptosis of fibroblast cell lines	2.39e-07	A4GALT,ABCE1,ABL1,ABL2,AHR,AIFM1,ATF2,ATF3,ATM,ATP6AP2,ATR,BACH2,BAK1,BAP1,BBC3,BCL2,BCL2A1,BCL2L11,BCL2L14,BID,BIRC2,BNIP3,CA3,CALB1,CAPNS1,CASP2,CASP9,CCNB1,CCNC,CCNG1,CDKN1B,CLIC4,COPS5,CRK,CTNNB1,DAPK1,DDIAS,DDIT3,DKK1,DUSP1,EGFR,EIF2S1,ENTPD5,EPHX1,ERG,ERN1,ETS1,FLI1,FN1,FOXO3,GLS,GNA13,GRB10,GRID2,GSN,HGF,IAPP,IKBKB,IL17RD,INSM2,ITGA6,ITGB1,ITPR1,JUN,KRAS,MAP2K4,MAP2K7,MAP3K1,MAP3K5,MAP3K8,…	124
Connective Tissue Development and Function,Embryonic Development,Organismal Development,Skeletal and Muscular System Development and Function,Tissue Development	Formation of skull	2.46e-07	ALG2,CHD7,CTNNB1,DLX5,EYA1,FGF10,FGF4,FOXO1,GLI3,GNA11,GNAQ,GPC3,GSKIP,HOXA1,INSIG1,INSIG2,LIF,NDST1,NOG,NR3C1,NR4A3,OTX2,PDGFRA,PITX2,POSTN,POU3F3,RBPJ,RUNX2,SMAD5,SNAI2,TBX1,TFAP2A,TGFB2,TWIST1,ZEB1	35
Developmental Disorder	Aplasia	2.49e-07	ABCA5,ABL1,ACVR2B,AHR,APBB2,ARID4B,ARID5B,BACH2,BAG4,BAK1,BCL2L11,BHLHE22,BLNK,CASP9,CD47,CDK6,CDKN1B,CITED2,COX7B,CTNNB1,DACT1,EPHA4,ERBB3,ESR2,EYA1,FGF10,FGF7,FKBP1A,FOXC2,FRMD4A,FUBP1,GATA6,GDNF,GPC3,GRIP1,HES1,HOXA11,HOXA9,HOXD13,HS2ST1,HTR4,IL7R,ITGA8,KLF4,KLF7,KMT2E,KRAS,LAMC1,LHX1,LHX2,LMX1B,LRP4,MDM4,MSTN,MTOR,MYBL1,NFIA,NFIB,NFKB1,OTX2,OVOL1,PAX6,PCLAF,PIK3AP1,PITX2,PPP3CA,RAG1,RARB,RARG…	87
Cancer,Organismal Injury and Abnormalities,Respiratory Disease	Lung carcinoma	2.51e-07	A4GNT,ABCA5,ABCA8,ABCB10,ABL1,ABL2,ABRAXAS2,ACE2,ADAM17,ADAM9,ADAMTS3,ADCYAP1R1,ADGRB3,ADGRL2,AGFG2,AGO1,AHR,AIFM1,AIPL1,AJAP1,AJUBA,ALCAM,ALDH8A1,ALK,AMACR,ANAPC1,ANGPTL1,AOAH,AP3S1,APLN,APOBEC3B,AQP10,AQP8,ARAP2,ARFGAP2,ARHGAP6,ARHGEF12,ARID2,ARID4B,ARID5B,ARMCX1,ASB11,ASZ1,ATAD2,ATF3,ATF7IP,ATM,ATP10B,ATP5F1B,ATP5IF1,ATR,ATRNL1,ATXN1,AURKA,AURKB,AVEN,B2M,BACE2,BAG6,BAP1,BBC3,BCL2,BCL2L11,BEND2…	758
Cancer,Organismal Injury and Abnormalities,Respiratory Disease	Lung cancer	2.55e-07	A4GNT,ABCA5,ABCA8,ABCB10,ABL1,ABL2,ABRAXAS2,ACE2,ACKR3,ADAM10,ADAM17,ADAM9,ADAMTS3,ADCYAP1R1,ADGRB3,ADGRL2,AGFG2,AGO1,AHR,AIFM1,AIPL1,AJAP1,AJUBA,AKAP12,ALCAM,ALDH8A1,ALK,ALOX5,AMACR,ANAPC1,ANGPTL1,AOAH,AP3S1,APLN,APOBEC3B,AQP10,AQP8,ARAP2,ARFGAP2,ARHGAP6,ARHGEF12,ARID2,ARID4B,ARID5B,ARMCX1,ASB11,ASZ1,ATAD2,ATF3,ATF7IP,ATM,ATP10B,ATP5F1B,ATP5IF1,ATR,ATRNL1,ATXN1,AURKA,AURKB,AVEN,B2M,BACE2,BAG6,BA…	817
Cardiovascular Disease,Organismal Injury and Abnormalities	Cardiac lesion	2.56e-07	ACE2,ADAM17,ADRA2C,ADRB1,AHR,ANGPT2,APLN,ATF3,BAK1,BMPR1A,BNIP3,CACNA1C,CAPNS1,CAV1,CAV3,CNR2,COQ9,CREB1,CSF3,CSRP3,CTNNA1,CTSV,DICER1,DIO3,DTNA,EGLN1,ERN1,ESR2,F11,FN1,GAS2L3,GATA4,GRB2,GSN,HAND2,HBEGF,HEXIM1,HMGB1,HOPX,HTR1B,IGF1R,ITGB1,JUN,KCNE2,KLF15,KLF5,LEP,LIMS1,LMNA,LPL,MAOA,MAP3K5,MAPK8,MBNL1,MBNL2,MEF2C,MMP9,MPO,MYOCD,NAMPT,NFKB1,NOX4,NPY1R,PIK3CA,PLAU,PNKD,POSTN,PPP1R13L,PPP3CA,PRKAR1A…	92
Nervous System Development and Function,Neurological Disease,Organ Morphology,Organismal Development,Organismal Injury and Abnormalities	Abnormal morphology of rhombencephalon	2.58e-07	ABCD2,ADAMTS4,AHI1,AKAP12,ALS2,ANK3,ATM,ATXN1,B4GALNT1,BCR,CACNA2D2,CALB1,CAMK4,CASP9,CCND2,CDK5R1,CDK5R2,CDKN2C,CNTN1,CTNNA2,CTSB,EBF1,EGFR,EI24,EPB41L2,EPM2A,ERBB3,FMR1,FUBP1,GLB1,GLI3,GMFB,GRID2,HEXB,HOXA1,IKBKB,KHDRBS1,KHDRBS2,KIF14,KIF2A,L1CAM,LIF,LMX1B,LYNX1,MAPK8IP1,MARVELD1,MDM4,MYH10,NEUROD1,NEUROD4,NFIA,NRCAM,OCLN,OSTM1,OTX2,PIANP,POMGNT1,PURA,RARG,RASA1,RNF2,ROBO2,RORA,SGCE,SMAD1,SOAT1…	71
Developmental Disorder,Neurological Disease,Organismal Injury and Abnormalities	Congenital encephalopathy	2.7e-07	ABCD2,ADAM10,ADRA2B,ADRA2C,ADRB1,AFF4,AHI1,ALOX5,ANGPT2,APBB2,ARHGEF2,ARID2,ARL13B,ARL6,ARMC9,ATM,ATP2C1,B3GALNT2,B4GAT1,BACE1,BAG6,BBS10,BCL10,BHLHE22,C8orf37,CACNA2D2,CASP9,CAV1,CC2D2A,CCDC88C,CCN2,CCND2,CD96,CDH11,CDK13,CDK20,CEP120,CEP19,CEP41,CFL1,CHD7,CHMP1A,CITED2,CLP1,CLU,CNN3,COL4A2,CTNNA2,CTSD,DCX,DICER1,DLAT,DLX5,DNMT3B,E2F5,EED,EFNA5,EGFR,EOMES,EPHA7,ERBB3,EXOC8,FGF10,FKBP1A,FLRT3,FMR…	220
Organismal Injury and Abnormalities	Fibrosis	2.74e-07	ABCB4,ABL1,ACE2,ACTA1,ADAM10,ADAM17,ADGRE1,ADK,ADRA2C,ADRB1,AGO1,AHR,ALOX5,ANGPT2,APLN,APRT,ATF3,AURKA,BARX2,BCL2,BDKRB2,BID,BMP2,BMP6,BMPR1A,CACNA1C,CAPNS1,CAV1,CAV3,CBL,CC2D2A,CCN2,CD151,CD160,CD1D,CD28,CD46,CDC37,CDH11,CEBPA,CENPX,CLIC5,CLU,CNR1,CNR2,COQ9,CREB1,CSF3,CSRP3,CTNNA1,CTNNB1,CTSB,CTSV,CXCL11,CXCL9,CYP1B1,CYP3A5,DAGLA,DDIT3,DDX5,DHFR,DICER1,DIO3,DTNA,DTNBP1,EDNRA,EDNRB,EFNB2,EGFR,ERG…	231
Cancer,Endocrine System Disorders,Organismal Injury and Abnormalities	Neuroendocrine tumor	2.78e-07	ABCB10,ABL1,ADAM10,ADAMTS18,ADRA2B,ADRA2C,AEN,AFF4,AKAP5,APOBEC3A,ARHGEF2,ATM,AVEN,B2M,BAP1,BCL2,BDNF,BLK,BLOC1S6,BNC2,C10orf105,C16orf70,CA1,CABLES1,CACNA1C,CAMSAP2,CBL,CCDC103,CCDC180,CCND3,CCNE2,CCSAP,CD274,CD70,CDC25B,CDH11,CDK2,CDKN1B,CDKN2C,CEBPD,CEP41,CFAP20DC,CHD2,CHL1,CHRM5,CLASP1,CLIC4,CLU,COL25A1,CREBRF,CTNNB1,CTSB,CTSV,CUZD1,CYYR1,DAPK1,DCAF4L2,DDX60L,DHFR,DHRSX,DICER1,DIS3,DLC1,DMWD,…	262
Cell-To-Cell Signaling and Interaction	Interaction of embryonic cell lines	2.88e-07	ABCA1,AKAP12,ATAT1,CAV1,CCN2,COLEC12,CRHR2,DAPK1,DLC1,FGA,FN1,GAB1,GRB2,HGF,INHBA,ITGAV,ITGB1,ITGB2,LOX,MGAT5,NCK2,PALLD,PLAU,PMP22,POSTN,PPP2CA,PTGER3,RASA1,RELN,SCARA3,SCARB1,SDC2,SDC4,SH3KBP1,SORT1,SRC,TMEM123,UTS2,VEGFA,VEGFD	40
Reproductive System Development and Function	Fertility	2.93e-07	ABCA1,ABCA2,ABCB4,ABL2,ADCYAP1R1,AHR,AKAP12,ALK,APRT,ARID4B,ARID5B,ASPH,ATAT1,ATP2B4,B3GNT5,BBC3,BMPR1A,BNC1,BTRC,CABLES1,CAMK4,CAV1,CCNE2,CD46,CDK6,CDKN1B,CEP41,CLCN3,CLIC4,CNBD2,CNOT6L,CPEB1,DICER1,DIO3,DNAJA1,E2F4,EFEMP1,EPN1,ESR2,F13A1,FOXO3,FSHB,FST,FYN,FZD1,GABBR1,GBA2,GMCL1,GNA11,GNAQ,GPR3,GRM1,H3-3A/H3-3B,HOXA10,HOXA11,HOXA9,HSP90AA1,HTR2B,IGF1R,IL6ST,INHBA,INSL5,IRS2,ITGB1,KHDC3L,KITLG,K…	142
Nutritional Disease	Obesity	2.98e-07	ABAT,ABCC8,ABCG1,ADGRE1,ADRA2B,ADRA2C,ADRB1,ANG,ANGPT2,ANGPTL6,APOC3,AQP7,ARID5B,ATF3,ATP6AP2,AURKB,B3GNT5,BBS10,BCAT2,BDNF,C1QL3,C1QTNF3,CA1,CA3,CACNA1C,CACNA2D1,CACNB1,CACNB2,CACNB4,CALCB,CAMKK2,CAV1,CBL,CCDC73,CCNA1,CCNB1,CCND3,CDCA8,CENPA,CEP19,CERS6,CFAP20DC,CHRM5,CHRNA6,CHRNA9,CISD1,CLOCK,CNR1,CNR2,COX19,CREB1,CREBRF,CRHR2,CX3CL1,CXCL11,CXCL2,CYBRD1,CYP51A1,DDIT3,DDX60L,DHFR,DICER1,DIXDC1,D…	220
Cell Morphology,Organ Morphology,Skeletal and Muscular System Development and Function,Tissue Morphology	Morphology of muscle cells	3.11e-07	ABL1,ACTA1,ADAM17,ADK,ADRB1,AHR,AKAP5,ALS2,ANGPT2,BDKRB2,BDNF,CACNB1,CAV1,CAV2,CAV3,CD47,CDK2,CDKN1B,CFL2,CHRM5,CLU,COL13A1,COL25A1,CSF3,CSRP3,CTNNB1,CTSV,CXADR,DICER1,DMPK,DOCK1,DTNA,DTNBP1,DUSP1,EGFR,ESR2,FN1,FOXO1,FOXO3,FST,FXR1,GAS2L3,GATA4,GATA6,GNAQ,H2AZ1,HAND2,HBEGF,HEXIM1,HEYL,HGF,HMGB1,HOXA9,HTR2B,IL1A,IL6R,IL6ST,INHBA,JUN,KALRN,KCND2,KITLG,KLF15,KLF4,LAMP2,LEP,LEPR,LIF,LIMS1,LMNA,LMO7,L…	140
Carbohydrate Metabolism	Metabolism of carbohydrate	3.17e-07	A4GNT,ABCC8,ADCYAP1R1,ADRB1,AGL,AGPAT4,AGPAT5,AJUBA,AKR1C1/AKR1C2,ALG2,AOAH,APLN,APLNR,APPL1,AQP9,ASPN,B3GALNT1,B3GALNT2,B3GALT2,B3GALT6,B3GAT2,B3GNT2,B3GNT7,B4GALNT1,B4GALT4,B4GALT6,B4GAT1,BDKRB2,BDNF,BMP2,C1QL3,CAMKK2,CASD1,CBR4,CCN2,CCND3,CEBPA,CHP1,CHPF2,CHPT1,CHST1,CHST11,CHST6,CHST9,CNKSR1,CNMD,CPNE3,CRH,CTNNB1,CYP2C9,CYP3A5,DBI,DDHD2,DGKA,DGKH,DGKQ,DSE,EPHX1,EPM2A,EPM2AIP1,EXT1,EXTL3,F2RL2…	261
Nervous System Development and Function,Neurological Disease,Organ Morphology,Organismal Development,Organismal Injury and Abnormalities	Abnormal morphology of metencephalon	3.2e-07	ABCD2,ADAMTS4,AHI1,AKAP12,ALS2,ANK3,ATM,ATXN1,B4GALNT1,BCR,CACNA2D2,CALB1,CAMK4,CCND2,CDK5R1,CDK5R2,CDKN2C,CNTN1,CTNNA2,CTSB,EBF1,EGFR,EI24,EPB41L2,EPM2A,ERBB3,FMR1,FUBP1,GLB1,GLI3,GMFB,GRID2,HEXB,KHDRBS1,KHDRBS2,KIF14,KIF2A,L1CAM,LIF,LMX1B,LYNX1,MAPK8IP1,MARVELD1,MDM4,MYH10,NEUROD1,NEUROD4,NFIA,NRCAM,OCLN,OSTM1,OTX2,PIANP,POMGNT1,PURA,RARG,RNF2,ROBO2,RORA,SGCE,SOAT1,SOX11,THAP1,UBE3A,VLDLR,ZNF423	66
Embryonic Development,Organ Development,Organismal Development,Reproductive System Development and Function,Tissue Development	Formation of mammary gland	3.35e-07	AHR,APLN,APRT,ATM,BCL2L11,BIRC2,BTRC,CAV1,CBL,CDKN1B,CDKN2C,CDO1,CEBPD,CREB1,CSN2,CUZD1,DSG2,EGFR,EPGN,ERBB3,ESR2,FAT1,FGF10,FGF7,FN1,FYN,GAL,GHRHR,GLI3,GSN,HEXIM1,HEYL,HGF,HOXA9,IGF1R,IRS1,IRS2,ITGB1,KALRN,LBH,LEP,LEPR,LIF,MED1,MET,MMP9,MTOR,MYBL1,NCOA2,NET1,NME1,NR3C1,NRG1,NRG3,NUMB,PGR,PHB2,PIN1,PTEN,PTGER2,PTHLH,PTPRF,RUNX2,SIRT1,SLIT2,SMAD4,SOCS2,SOCS5,SRC,STAT5A,STAT5B,STMN1,TGFA,THRSP,TNFS…	81
Cardiovascular System Development and Function	Morphogenesis of cardiovascular system	3.4e-07	ACVR1,AHI1,AHR,ANGPT2,ARID2,ARL13B,ATF2,BMP2,BMP5,BMPR1A,CCDC103,CERT1,CHD7,CITED2,CLIC4,CNMD,CRKL,CTNNB1,CXCL2,CYP1B1,DCHS1,DLC1,EFNA1,EFNB2,EGLN1,EPHA2,EYA1,FGF10,FKBP1A,FOXA2,FOXC1,FOXC2,FZD1,GATA4,HAND2,HES1,HEYL,HGF,HOXA1,HTR2B,IFT52,ISL1,JUN,KDR,LOX,LRP6,MAP2K3,MAPK7,MDM4,MECOM,MEF2C,MET,MIB1,MRTFB,MTOR,NOG,NPY1R,NPY2R,NPY5R,NR2F2,NRP1,NUS1,PIK3C2A,PITX2,PKD2,PKP2,PRRX1,PSEN2,RASA1,RBPJ,RCA…	103
Cancer,Gastrointestinal Disease,Organismal Injury and Abnormalities	Gastric carcinoma	3.47e-07	A4GNT,ABCA1,ABCC8,ABL1,ACO1,ACVR1,ADAM7,ADAM9,ADAMTS18,ADCK1,ADD3,ADGRL2,AGO1,AHRR,AJAP1,ALCAM,ALS2,AMMECR1L,ANAPC1,ANGPT2,ANK3,ANLN,AP2A2,AP3M2,APBA2,ARHGAP32,ARHGEF18,ARID2,ARID3A,ARID5B,ASIC1,ATG4B,ATM,ATP6V0A2,ATP8A1,ATR,B2M,B4GALNT1,BACE2,BCAP29,BCL2,BDP1,BEND7,BHLHE22,BLK,BMP2K,BNC2,BOD1L1,BRD9,BSN,C11orf54,C11orf88,C14orf39,C8B,CA1,CACNA1C,CACNA1E,CACNB2,CALD1,CANX,CASD1,CASP2,CASP5,CCDC10…	454
Nervous System Development and Function,Organ Morphology,Organismal Development	Morphology of cerebral cortex	3.52e-07	ABI2,ABL2,AKTIP,AP3M2,APBB2,ARL6,ATAT1,BACE1,BCL2L11,BDNF,BID,BMPR1A,BMPR1B,BTG1,CACNG8,CASP9,CAV1,CDK5R1,CDK5R2,CDKN1B,CHL1,CHMP2B,CLCN3,CNTN6,CPEB4,CRMP1,CTNNA2,CTNNB1,CTSB,CTSV,DAB1,DCX,DFFA,DSCAM,E2F5,EFNA5,EGFR,EIF4EBP2,EPHA4,ERBB3,ESR2,FMR1,FOXO3,FYN,GAL,GAP43,GLI3,GRIN2B,HDC,ITGA6,ITGB1,KALRN,KIF14,KIF2A,KLF7,L1CAM,LAMC1,LHX2,LMX1B,MAGOH,MAOA,MCPH1,NEUROD1,NFIA,NFIB,NPAS3,NR4A2,OPHN1,OTX2,…	99
Tissue Development	Formation of gland	3.57e-07	AHR,APLN,APRT,ARID5B,ATM,BCL2L11,BIRC2,BTRC,CALB1,CAV1,CBL,CBX2,CDKN1B,CDKN2C,CDO1,CEBPD,CITED2,CREB1,CRH,CRKL,CSN2,CUZD1,DSG2,EGFR,EPGN,ERBB3,ESR2,EYA1,FAT1,FGF10,FGF7,FN1,FYN,GAL,GHRHR,GLI3,GSN,HEXIM1,HEYL,HGF,HOXA9,ID4,IGF1R,IRS1,IRS2,ITGB1,KALRN,KLF6,LBH,LEP,LEPR,LIF,MED1,MET,MMP9,MTOR,MYBL1,NCOA2,NET1,NME1,NR3C1,NRG1,NRG3,NRP1,NUMB,PDGFRA,PGR,PHB2,PIN1,PLAU,PTEN,PTGER2,PTHLH,PTPRF,RUNX2,SIRT…	97
Cell Cycle,Cellular Movement	Cytokinesis of cervical cancer cell lines	3.58e-07	ANLN,AURKA,CD2AP,ECT2,GNAI1,GNAI3,KIF13A,KIF14,KIF20B,KIF23,LMNA,NEK7,OCRL,PI4KB,PIN1,RAB35,RAC1,RASSF1,RGS14,RHOA,SEPTIN6,SEPTIN7,SEPTIN9,SLC20A1,SPART,SSRP1,STX16,TERF1,TTC19,ZFYVE26	30
Organismal Development,Skeletal and Muscular Disorders,Skeletal and Muscular System Development and Function	Abnormal morphology of limb	3.6e-07	AKAP11,ARID5B,ATL1,BMPR1B,CACNB1,CBX2,CCN2,CCN3,CCP110,CD47,CD80,CDK20,CDO1,COL13A1,COL9A1,CREB3L2,CYP51A1,DKK1,DMP1,DNAJC21,EGLN3,ERRFI1,ESR2,EVX2,FGF10,FST,FSTL1,GDAP1,GPC3,HAND2,HELLS,HEXB,HOXA10,HOXA11,HOXA9,HOXB5,HOXC13,HOXD10,HOXD13,IGF1R,IL6ST,IRS1,ITGA6,KLF10,LMBR1,LMX1B,LRP4,LRP6,MDM4,MED1,MEOX2,MMP16,MMP9,MSTN,NOG,NPFFR2,NPR3,OCLN,PDGFRA,PGR,PLAGL1,PRRX1,PTH,PTHLH,RARB,RARG,RDH10,RPS6KB…	95
Cellular Development,Cellular Growth and Proliferation	Proliferation of blood cells	3.64e-07	ABCG1,ABI2,ABL1,ACP3,ADAM17,ADK,AHR,ALCAM,AMACR,APPL1,ATM,ATP6V0A2,AURKA,AURKB,B2M,B3GNT2,B3GNT5,BACH2,BBC3,BCL10,BCL2,BCL2A1,BCL2L11,BCR,BHLHE40,BLNK,BMP2,BMPR1B,BTLA,CALCB,CBL,CBX2,CCL22,CCL3,CCND2,CCND3,CD151,CD160,CD1D,CD226,CD274,CD28,CD2AP,CD300A,CD3G,CD46,CD47,CD69,CD70,CD80,CDK2,CDK6,CDKN1B,CDKN2C,CEBPA,CLEC4G,CNR2,CREB1,CRH,CRIP3,CSF3,CTNNB1,CXCL2,DAB2,DGKA,DHFR,DICER1,DUSP1,DUSP10,DUSP2…	308
Cellular Movement	Cell movement of squamous cell carcinoma cell lines	3.68e-07	ADAM17,AURKA,BDNF,CCL7,CCN2,CCN4,CLU,CSF3,CTSB,DDX58,DLX3,DSE,EGFR,EZR,FHOD1,FN1,FOXF1,FOXP1,GALNT2,HAS2,HGF,HIF1AN,IFIT2,IL17A,IL22,ITGAV,ITGB6,JUN,KLF4,L1CAM,MET,NME1,PDPN,PRKCI,RAC1,SELE,SNAI2,SRC,SULF1,TP63,ZEB1,ZEB2,ZNF750	43
Cellular Movement,Embryonic Development	Migration of embryonic cell lines	3.81e-07	APPL1,ARHGEF12,ATG12,ATG9A,CCR8,CDH11,CHL1,CLIC4,CNN3,CNR1,CRKL,CSK,CTTN,DLC1,DOCK1,DOCK4,EFEMP1,ELK3,EPHA2,FGA,FN1,FOXF1,GAB1,GIT2,GPC1,HARS1,HGF,IGF1R,ITGA1,ITGB1,ITGB2,L1CAM,MEOX2,MGAT5,MYLK,NARS1,NDST1,NFKB1,NR4A1,PALLD,PDGFD,PLAU,PMP22,POSTN,PTEN,PTP4A1,PTPN12,RAC1,RASA1,RASSF1,RECK,RHOA,ROCK1,ROCK2,SARS1,SRC,TFAP2A,TFAP2C,TMEFF2,TP53INP1,VEGFD	61
Cell Morphology,Cellular Assembly and Organization,Cellular Development,Cellular Function and Maintenance,Cellular Growth and Proliferation,Nervous System Development and Function,Organismal Development,Tissue Development	Formation of dendrites	3.92e-07	ABI2,ABL2,ADGRB3,AKAP5,ANKRD27,BDNF,BTBD3,CAMSAP2,CAPRIN1,CELSR2,CRK,CRKL,CTNNA2,DAB1,DACT1,DCX,DSCAM,DTNBP1,ELAVL4,EPHA4,FBXO31,FYN,HPRT1,ITGB1,KALRN,KIDINS220,KIF23,KLF7,L1CAM,LOX,LRP4,LST1,MAPK8,MARK1,MET,MYO5B,NFIA,NRG1,NRP1,NUMB,PAK1,PPP1R9B,PPP3CA,PTPRD,PTPRF,PTPRZ1,RAB17,RAB21,RABGEF1,RAC1,RAP2A,RAPGEF2,RAPGEF4,RBFOX2,RELN,RERE,RHOA,ROCK2,SDC2,SGK1,SLC25A46,SMAD1,SMAD4,STRN,TET1,TGFBR1,TRP…	71
Connective Tissue Development and Function,Skeletal and Muscular System Development and Function,Tissue Development	Growth of bone tissue	4.02e-07	ABL1,AHR,APLN,APLNR,ATRAID,BCL2,BMP2,CAPNS1,CNR2,CTNNB1,DMP1,EGFR,FGF13,FIGNL1,GREM1,HDAC7,HGF,HTR2B,HTR4,IGF1R,ITGAV,ITGB1,KITLG,LEP,MN1,NELL1,NPR3,PDGFRA,POSTN,PTH,PTHLH,RHOA,RUNX2,SIRT1,SRC,TMEM119,TNFRSF11B,TNFSF11,TREM2,TWIST1	40
Cancer	Transformation of fibroblast cell lines	4.03e-07	ABL1,ALK,ALKAL2,ARHGAP32,ARHGEF12,ASPH,ATF3,AURKA,AURKB,BAK1,BCL2,BLK,CBL,CCN4,CCND2,CCND3,CDK6,CDKN1B,CEBPA,CHRM5,CLU,CRK,CTNNB1,DCUN1D1,DCUN1D3,DKK1,DLC1,ECT2,EGFR,EIF2S1,EPS8,ERBB3,ERRFI1,ETS1,FER,FGF20,FGF4,FOXO3,FRS2,FYN,GAB1,GNA13,GNAQ,GRB2,HBP1,HCK,HGF,HMGA2,HSP90AA1,HTR2A,HTR2C,IGF1R,IRS1,JUN,KLF6,KRAS,LCK,LOX,LRIG1,MAP2K1,MAP3K8,MAPK1,MAPK7,MAPK8,MAPK8IP1,MAPK9,MECOM,MET,MITF,MTA1,MTOR,N…	102
Connective Tissue Disorders,Developmental Disorder,Gastrointestinal Disease,Organismal Development,Organismal Injury and Abnormalities,Skeletal and Muscular Disorders	Cleft palate	4.08e-07	ADRA2B,ADRA2C,AHR,ASPH,CCP110,CDK20,CRK,CTNND1,CYP51A1,DHFR,DNMT3B,EFNA5,EGFR,FGF10,FGF9,FOXC2,FOXF2,GSKIP,HKDC1,INSIG1,INSIG2,IRF6,ITGAV,ITGB8,KCNJ2,LHX8,LRP6,MDM4,MEIS2,MMP16,MN1,MSTN,PBX2,PBX3,PDGFRA,PITX2,PPP3CA,RARG,RSPO2,RYK,SATB2,SC5D,SNAI2,SOX11,TBX1,TBX22,TGFA,TP63,VEGFA,WFIKKN2	50
Cardiovascular System Development and Function,Cellular Movement	Cell movement of endothelial cells	4.09e-07	ABL1,ACKR3,ADAM17,ADGRA2,ALCAM,ANGPT2,ANGPTL1,ATF2,ATOH8,ATP2B4,ATP5F1B,BDNF,BMP2,BMP6,CALCB,CAV1,CAVIN2,CCR8,CD151,CDKN1B,CLEC1B,COL4A2,CRK,CSF3,CXCL1,CYP1B1,DGKA,DICER1,DIP2A,DKK1,DLC1,DMP1,DOCK1,EFNA1,EFNB2,EGFR,EGR3,ERG,ETS1,F2RL1,FAP,FN1,FOXC1,FOXC2,FOXO1,FOXO3,FOXP1,FRS2,FSTL1,GAB1,GATA6,GNA11,GPC1,GREM1,HGF,HMGB1,HOXA9,IL17A,ITGAV,ITGB1,ITGB2,KDR,KLHL20,KMT2A,LEP,LOX,MAP2K3,MAPKAPK2,MAPKAP…	135
Developmental Disorder	Agenesis	4.14e-07	ABCA5,ABL1,ACVR2B,AHR,APBB2,ARID4B,ARID5B,BACH2,BAG4,BAK1,BCL2L11,BHLHE22,BLNK,CASP9,CD47,CDK6,CDKN1B,CITED2,CTNNB1,DACT1,EPHA4,ERBB3,ESR2,EYA1,FGF10,FGF7,FKBP1A,FOXC2,FRMD4A,FUBP1,GATA6,GDNF,GPC3,GRIP1,HES1,HOXA11,HOXA9,HOXD13,HS2ST1,IL7R,ITGA8,KLF4,KLF7,KMT2E,LAMC1,LHX1,LHX2,LMX1B,LRP4,MDM4,MSTN,MTOR,MYBL1,NFIA,NFIB,NFKB1,OTX2,OVOL1,PCLAF,PIK3AP1,PITX2,PPP3CA,RAG1,RARB,RARG,RDH10,RERE,RORC,RPS6…	83
Cell Death and Survival,Skeletal and Muscular Disorders	Cell death of muscle cells	4.18e-07	ADRB1,ALS2,ATG16L1,ATP2B4,BACH1,BAG1,BBC3,BCL2,BCL2L11,BID,BMP2,BNIP3,CACNB2,CASP9,CAV1,CAV3,CBL,CCL3,CCN4,CCNT1,CDC42EP3,CDK2,CNR1,CNR2,COL13A1,CREG1,CSF3,CTNNB1,CXADR,CYCS,DDIT3,DICER1,DIP2A,DMPK,E2F3,EGLN1,ETS1,FHL1,FOXO1,FOXO3,FSTL1,GATA4,GATA6,GNA14,GNAQ,GNGT1,GNPTG,GSN,HBEGF,HGF,HTR2B,IGF1R,IL19,IL1A,IL6ST,INHBA,KITLG,KLF13,KLF5,KRAS,LAMP2,LEP,LEPR,LIF,LIMS1,LMNA,MAOA,MAP2K1,MAP2K4,MAP3K1,M…	118
Cellular Movement,Renal and Urological System Development and Function	Migration of kidney cell lines	4.23e-07	ADI1,ARHGEF12,CCR8,CDH11,CHL1,CNR1,CTTN,DOCK1,DOCK4,EPHA2,EZR,FGA,FN1,GAB1,HARS1,HGF,ITGA1,ITGB1,ITGB2,L1CAM,NARS1,NFKB1,NOX4,PDPN,PLAU,POSTN,PRKX,PTP4A1,RALB,RANBP9,RECK,RHOA,ROCK2,SARS1,SEPTIN9,SRC,TBXA2R,TMEFF2,VEGFA,VEGFD,WASF3,ZEB1	42
Cell-To-Cell Signaling and Interaction	Activation of cells	4.34e-07	ACKR3,ADAM10,ADAM9,ADGRF5,AHR,ALOX5,ALS2,ANGPT2,ANGPTL6,ANK3,APLN,ATF3,ATM,ATP6V0A2,B2M,BACH2,BAG6,BAK1,BCL10,BCL2,BCL2A1,BCL2L11,BDNF,BHLHE40,BLNK,BLOC1S6,BMP2,BMPR1A,BNIP3,BTLA,C4A/C4B,CAMK4,CBL,CCK,CCL22,CCL3,CCL7,CCN2,CD1A,CD1D,CD200,CD226,CD274,CD28,CD300LD,CD3G,CD46,CD47,CD80,CDK5R1,CDK5RAP3,CDKN1B,CEACAM6,CEBPA,CFL1,CHST11,CLEC1B,CLEC4G,CNR1,CNR2,CRY1,CSF3,CSK,CTNNB1,CTNND1,CX3CL1,CXCL2,CY…	323
Cellular Movement,Embryonic Development,Nervous System Development and Function	Migration of neuroblasts	4.35e-07	BDNF,CNR1,CNR2,EDNRB,EFNB2,EPHA4,FSCN1,GRB2,HGF,NRG1,PTEN,RELN,RTN4,SIX3	14
Digestive System Development and Function,Gastrointestinal Disease	Abnormal morphology of digestive system	4.38e-07	A4GNT,ABCA5,ABCB10,ABCB4,ABL1,ACVR2B,ADAM17,ADAMTS3,AGL,AHR,AKAP5,AMACR,AOAH,ARFGEF3,ARID4B,ATF2,ATF3,ATF7,B2M,BCL2,BCR,BDNF,BID,C4A/C4B,CAV1,CBX2,CCL28,CCNG1,CD1D,CDK2,CDKN1B,CDNF,CEBPA,CIAPIN1,CLCN3,CREB3L2,CRKL,CTNNB1,CTSD,CYP51A1,DACT1,DCHS1,DDX58,DKK1,DLX5,DNAJB9,DNAJC3,DUSP1,E2F4,EDNRA,EDNRB,EGFR,EGLN3,EI24,ENTPD5,ERBB3,ESR2,F11,FBXL20,FGA,FGF10,FGF9,FHIT,FOXA2,FOXC2,FOXF2,FOXP3,FST,FUBP1,G…	220
Free Radical Scavenging	Synthesis of reactive oxygen species	4.45e-07	ABCA1,ABL1,ACP5,AFG3L2,AHR,AIFM1,ALOX5,ALS2,ANGPT2,APLNR,APOL6,ASIC1,ATG16L1,ATP5IF1,ATP6AP2,BACE2,BAP1,BBC3,BCL2,BID,BNIP3,CALB1,CANX,CAV1,CD28,CD47,CD52,CISD3,CLCN3,CSF3,CTTN,CXCL2,CXCL9,CYP1B1,CYP2D6,DBI,DDIT3,DHCR24,EGFR,EPAS1,ERBIN,ESR2,ETS1,F2RL1,FCMR,FOXO1,FYN,GAB2,GRM5,GSN,GZMK,HAS2,HCK,HGF,HMGB1,HSPA9,HTN3,HTR2A,HTR4,IKBKB,IL17A,IL19,IL22,IL24,ITGA1,ITGA6,ITGB1,ITGB2,ITM2B,ITPR2,KLF4,KRA…	159
Skeletal and Muscular Disorders	Abnormality of limb	4.53e-07	ADAMTS18,ADAMTS3,ADAMTS4,ADAMTS8,ADRA2B,ADRA2C,ADRB1,AKAP11,ARID5B,ATF3,ATL1,ATR,B2M,BDKRB2,BID,BMPR1B,CACNB1,CBX2,CCN2,CCN3,CCP110,CD28,CD47,CD80,CDK20,CDO1,COL13A1,COL21A1,COL25A1,COL4A2,COL4A4,COL4A6,COL9A1,CREB3L2,CSK,CYP51A1,DKK1,DLX5,DMP1,DNAJC21,EDAR,EDARADD,EGLN1,EGLN3,ERRFI1,ESR2,EVX2,F13A1,FGF10,FGF9,FN1,FST,FSTL1,FZD6,GDAP1,GJB2,GJC1,GPC3,HAND2,HELLS,HEXB,HOXA10,HOXA11,HOXA5,HOXA9,HOXB…	148
Cardiovascular System Development and Function,Cellular Movement	Migration of endothelial cells	4.57e-07	ABL1,ACKR3,ADAM17,ADGRA2,ALCAM,ANGPT2,ANGPTL1,ATF2,ATOH8,ATP2B4,ATP5F1B,BDNF,BMP2,BMP6,CALCB,CAV1,CAVIN2,CD151,CDKN1B,CLEC1B,COL4A2,CSF3,CXCL1,CYP1B1,DICER1,DIP2A,DKK1,DLC1,DMP1,EFNB2,EGFR,EGR3,ERG,ETS1,F2RL1,FAP,FN1,FOXC1,FOXC2,FOXO1,FOXO3,FOXP1,FRS2,FSTL1,GAB1,GATA6,GNA11,GPC1,GREM1,HGF,HMGB1,HOXA9,IL17A,ITGAV,ITGB1,ITGB2,KDR,KLHL20,KMT2A,LEP,LOX,MAP2K3,MAPKAPK2,MAPKAPK5,MEF2C,MEOX2,MTOR,NCL,ND…	126
Cell Cycle	G1 phase	4.89e-07	ACVR1,AHR,AKAP12,APOBEC3A,ATF3,ATM,BAP1,BCL2,BHLHE40,BMP2,BTRC,CABLES1,CACUL1,CAMK1,CAMKK2,CAPNS1,CBL,CCNA1,CCND2,CCND3,CCNE2,CCNG1,CCNG2,CCNH,CD28,CDC25B,CDCA2,CDK2,CDK3,CDK5RAP3,CDK6,CDKN1B,CDKN2C,CDKN3,CEBPA,CEBPD,CNDP2,COPS5,CREG1,CRH,CRKL,CRLF3,CSF3,CUL5,CYP1B1,DAB2,DAB2IP,DARS1,DDIAS,DDIT3,DDX24,DLX3,DTD1,DUSP1,E2F3,E2F4,E2F5,EGFR,ERBB3,ERG,ESR2,ETS1,FKBP1A,FN1,FOXA1,FOXC2,FOXO1,FOXO4,GLI3,…	169
Digestive System Development and Function	Morphology of digestive system	4.95e-07	A4GNT,ABCA5,ABCB10,ABCB4,ABL1,ACVR1C,ACVR2B,ADAM17,ADAMTS3,ADGRE5,ADIPOR2,AGL,AHR,AKAP5,AMACR,AOAH,AQP7,ARFGEF3,ARID4B,ATF2,ATF3,ATF7,B2M,BCL2,BCR,BDNF,BID,C4A/C4B,CAV1,CBX2,CCK,CCL28,CCND2,CCNG1,CD1D,CDK2,CDKN1B,CDNF,CEBPA,CIAPIN1,CLCN3,CREB3L2,CRKL,CTNNB1,CTSD,CTSV,CYBRD1,CYP51A1,DACT1,DCHS1,DDX58,DICER1,DIO3,DKK1,DLX5,DNAJB9,DNAJC3,DUSP1,E2F4,EDNRA,EDNRB,EFEMP1,EGFR,EGLN3,EI24,ENTPD5,EPGN,ERBB…	274
Cancer,Organismal Injury and Abnormalities	Pelvic serous carcinoma	4.99e-07	ABCA8,ACP5,ALK,ANXA8/ANXA8L1,ARID5B,ATM,ATR,AURKA,B2M,BAP1,BCL10,BCL2,BCR,BNC1,C2orf88,C4A/C4B,CARD16,CD274,CDKN1B,CDKN2C,CEP43,CLU,CTNNB1,DAB2,DTNA,E2F3,EGFR,EPHA3,ESR2,FAM171A1,FBXW7,FLII,FOXA2,FOXG1,FOXN2,FZD3,GATA6,GNA13,HGF,HPS3,HSP90AA1,KDR,KEAP1,KLK7,KRAS,LOX,LRIG1,MAP2K1,MAP2K4,MAP3K1,MAP3K21,MAPK1,MAPK8IP1,MECOM,MET,MFAP5,MTOR,MUC1,NAV3,NRAS,OCLN,PARP2,PDGFRA,PGR,PHF6,PIK3CA,PIK3R1,POSTN…	96
Cellular Development,Cellular Growth and Proliferation,Organ Development,Skeletal and Muscular System Development and Function,Tissue Development	Proliferation of smooth muscle cells	4.99e-07	ACE2,ANG,BMP2,BMPR1A,CAV1,CBL,CCL3,CCN3,CCN4,CDK6,CDKN1B,CEBPD,CRHR2,CTNNB1,CX3CL1,E2F3,EDNRA,EFNB2,EGFR,ESR2,FAT1,FHL1,FOXF2,FOXO1,FOXP1,GNAQ,HAS2,HBEGF,HDAC7,HGF,HMGA2,IGF1R,IL12B,IL17A,IL17F,IL1A,IL22,IL6R,IL6ST,INHBA,IRS1,ITGB1,JUN,KALRN,KLF4,KLF5,LEP,LMNA,LPAR1,MAPK1,MTOR,NAMPT,NOX4,NPR3,NPY5R,NR4A1,NR4A2,NR4A3,PAK1,PDE4D,PDGFD,PGR,PIK3CA,PIK3R1,PIN1,PLAU,PRRX1,PTAFR,PTEN,PTHLH,PTPRF,RAB5A,R…	96
Embryonic Development,Organ Development,Organismal Development,Tissue Development	Development of sensory organ	5.02e-07	ABI2,ABL1,ADAM17,ADAM9,ADAMTS18,AHI1,AIPL1,AKTIP,AP1S2,AQP5,ARL13B,ARL6,ATM,BBS10,BCL2,BCL2L11,BCR,BDNF,BFSP1,BID,BLOC1S5,BMP2,BMP5,BMP6,BMPR1B,BNC2,C8orf37,CD46,CDK2,CDK20,CDKN1B,CEBPA,CEBPD,CFL1,CHD7,CHRDL1,CHRNA9,CHST6,CLCN3,CLIC4,CPLX3,CRK,CTNNB1,CTSD,CYP1B1,DICER1,DIO3,DKK2,DLX5,DNAJC5,DSCAM,EBF1,EBF3,EFEMP1,EGFR,EGLN3,ELK3,EOMES,ERC2,EYA1,FBXW7,FGF10,FGF20,FGF4,FGF7,FGF9,FMR1,FOXC1,FOXC2,FO…	219
Embryonic Development	Quantity of embryo	5.15e-07	ANGPT2,ATF2,BBC3,BDNF,BMPR1A,BMPR1B,CAPNS1,CASP9,CBL,CDK20,CDKN1B,CHD7,CITED2,CSF3,CTNNB1,EDNRB,EGFR,EGLN1,EOMES,FGF4,FGF9,FOXO3,FST,FSTL1,GLB1,GREM1,HES1,HGF,HOXA1,HOXA9,IL6ST,INHBA,ITGA1,KLF5,LEP,LIF,LMX1B,MET,NAP1L2,NEIL3,NOG,NPY1R,NPY2R,OGG1,PCLAF,PDGFRA,PITX2,PPP1R13L,PPP4R3A,PRDM16,PSEN2,PTEN,QKI,RARB,RBPJ,SOX10,TFAP2C,TNKS,TNKS2,TP63,TRNP1,TWIST1,VEGFA,WIF1,WNT5A,ZBTB18,ZIC3	67
Gene Expression	Transactivation of RNA	5.26e-07	ACVR1,ACVR2B,AHR,AHRR,APBA2,APPL1,ARHGEF12,ASCC1,ATF1,ATF2,ATOX1,BAG1,BCL2,BCR,BDNF,BICRA,BMP2,BTRC,CCND2,CCND3,CCNH,CCNT1,CD28,CD80,CIAO1,CITED2,COPS5,CREB1,CTNNB1,DAB2,DAP3,DDIT3,DDX20,DDX58,DDX60L,DHX9,DTX4,DUSP3,E2F3,E2F4,ELL,EPAS1,ERG,ERN1,ESR2,FOXC1,FOXO1,FOXO3,FOXO4,FOXP3,GABPB1,GABPB2,GATA4,GATA6,GNA13,HBP1,HES1,HGF,HSPA9,IKBKB,IL1A,IL6R,INHBA,IRF4,JAZF1,JMJD6,JUN,KAT7,KCTD11,KLF13,KLF4,K…	170
